# Supplementary material
Source: publisher figshare collection journal article supplement (https://tandf.figshare.com/articles/dataset/_/12212963)

# checkCIF/PLATON report

You have not supplied any structure factors. As a result the full set of tests cannot be run.

THIS REPORT IS FOR GUIDANCE ONLY. IF USED AS PART OF A REVIEW PROCEDURE FOR PUBLICATION, IT SHOULD NOT REPLACE THE EXPERTISE OF AN EXPERIENCED CRYSTALLOGRAPHIC REFEREE.

No syntax errors found.      CIF dictionary      Interpreting this report

## Datablock: mx-20181217

---

|                 |                  |                                       |
|-----------------|------------------|---------------------------------------|
| Bond precision: | C-C = 0.0110 Å   | Wavelength=1.54184                    |
| Cell:           | a=6.7743(3)      | b=11.1591(6)      c=13.7721(4)        |
|                 | alpha=100.881(3) | beta=102.221(3)      gamma=105.571(4) |
| Temperature:    | 295 K            |                                       |
|                 | Calculated       | Reported                              |
| Volume          | 946.23(8)        | 946.23(7)                             |
| Space group     | P -1             | P -1                                  |
| Hall group      | -P 1             | -P 1                                  |
| Moiety formula  | C16 H16 Ba2 O13  | C16 H16 Ba2 O13                       |
| Sum formula     | C16 H16 Ba2 O13  | C16 H16 Ba2 O13                       |
| Mr              | 690.95           | 690.97                                |
| Dx,g cm-3       | 2.425            | 2.425                                 |
| Z               | 2                | 2                                     |
| Mu (mm-1)       | 32.846           | 32.846                                |
| F000            | 656.0            | 656.0                                 |
| F000'           | 654.53           |                                       |
| h,k,lmax        | 8,13,16          | 8,13,16                               |
| Nref            | 3669             | 3510                                  |
| Tmin,Tmax       |                  | 0.046,1.000                           |
| Tmin'           |                  |                                       |

Correction method= # Reported T Limits: Tmin=0.046 Tmax=1.000  
AbsCorr = MULTI-SCAN

|                               |                                 |
|-------------------------------|---------------------------------|
| Data completeness= 0.957      | Theta(max)= 71.343              |
| R(reflections)= 0.0747( 3190) | wR2(reflections)= 0.2120( 3510) |
| S = 1.043                     | Npar= 273                       |

---

The following ALERTS were generated. Each ALERT has the format  
**test-name\_ALERT\_alert-type\_alert-level.**  
Click on the hyperlinks for more details of the test.

---

### Alert level B

|                   |                      |     |        |   |              |
|-------------------|----------------------|-----|--------|---|--------------|
| PLAT420_ALERT_2_B | D-H Without Acceptor | O3  | --H3   | . | Please Check |
| PLAT420_ALERT_2_B | D-H Without Acceptor | O11 | --H11B | . | Please Check |

---

### Alert level C

DIFMX02\_ALERT\_1\_C The maximum difference density is > 0.1\*ZMAX\*0.75  
The relevant atom site should be identified.

|                   |                                                 |                           |          |       |                 |
|-------------------|-------------------------------------------------|---------------------------|----------|-------|-----------------|
| PLAT029_ALERT_3_C | _diffn_measured_fraction_theta_full             | value Low                 | .        | 0.975 | Why?            |
| PLAT053_ALERT_1_C | Minimum Crystal Dimension Missing (or Error)    | ...                       |          |       | Please Check    |
| PLAT054_ALERT_1_C | Medium Crystal Dimension Missing (or Error)     | ...                       |          |       | Please Check    |
| PLAT055_ALERT_1_C | Maximum Crystal Dimension Missing (or Error)    | ...                       |          |       | Please Check    |
| PLAT097_ALERT_2_C | Large Reported Max. (Positive) Residual Density |                           |          | 4.79  | eA-3            |
| PLAT213_ALERT_2_C | Atom O3                                         | has ADP max/min Ratio     | ....     | 3.4   | oblate          |
| PLAT213_ALERT_2_C | Atom O6                                         | has ADP max/min Ratio     | ....     | 3.1   | oblate          |
| PLAT213_ALERT_2_C | Atom C9                                         | has ADP max/min Ratio     | ....     | 3.8   | oblate          |
| PLAT222_ALERT_3_C | Non-Solv. Resd 1 H                              | Uiso(max)/Uiso(min) Range |          | 5.2   | Ratio           |
| PLAT241_ALERT_2_C | High 'MainMol' Ueq as Compared to Neighbors of  |                           |          | 09    | Check           |
| PLAT241_ALERT_2_C | High 'MainMol' Ueq as Compared to Neighbors of  |                           |          | 013   | Check           |
| PLAT245_ALERT_2_C | U(iso) H3                                       | Smaller than U(eq) O3     | by       | 0.023 | Ang**2          |
| PLAT314_ALERT_2_C | Small Angle for H2O: Metal-O11                  | -H11A                     | .        | 54.01 | Degree          |
| PLAT342_ALERT_3_C | Low Bond Precision on C-C Bonds                 | .....                     |          | 0.011 | Ang.            |
| PLAT410_ALERT_2_C | Short Intra H...H Contact                       | H5                        | ..H10    | .     | 1.95 Ang.       |
|                   |                                                 |                           | x,y,z =  | 1_555 | Check           |
| PLAT751_ALERT_4_C | Bond Calc                                       | 2.24000, Rep              | 2.243(7) | ..... | Senseless s.u.  |
|                   | BA1                                             | -H3                       | 1.555    | 2.665 | ..... # 4 Check |

---

### Alert level G

|                   |                                                  |       |    |      |             |
|-------------------|--------------------------------------------------|-------|----|------|-------------|
| PLAT003_ALERT_2_G | Number of Uiso or Uij Restrained non-H Atoms     | ...   |    | 2    | Report      |
| PLAT004_ALERT_5_G | Polymeric Structure Found with Maximum Dimension |       |    | 3    | Info        |
| PLAT007_ALERT_5_G | Number of Unrefined Donor-H Atoms                | ..... |    | 10   | Report      |
| PLAT072_ALERT_2_G | SHELXL First Parameter in WGHT Unusually Large   |       |    | 0.17 | Report      |
| PLAT093_ALERT_1_G | No s.u.'s on H-positions, Refinement Reported as |       |    |      | mixed Check |
| PLAT171_ALERT_4_G | The CIF-Embedded .res File Contains EADP Records |       |    | 2    | Report      |
| PLAT186_ALERT_4_G | The CIF-Embedded .res File Contains ISOR Records |       |    | 2    | Report      |
| PLAT774_ALERT_1_G | Suspect X-Y Bond in CIF: Ba1                     | --Ba2 | .. | 4.37 | Ang.        |
| PLAT860_ALERT_3_G | Number of Least-Squares Restraints               | ..... |    | 12   | Note        |
| PLAT883_ALERT_1_G | No Info for _atom_sites_solution_primary         | ..... |    |      | Please Do ! |
| PLAT933_ALERT_2_G | Number of OMIT Records in Embedded .res File     | ...   |    | 91   | Note        |

---

0 **ALERT level A** = Most likely a serious problem - resolve or explain  
2 **ALERT level B** = A potentially serious problem, consider carefully  
17 **ALERT level C** = Check. Ensure it is not caused by an omission or oversight  
11 **ALERT level G** = General information/check it is not something unexpected

7 ALERT type 1 CIF construction/syntax error, inconsistent or missing data  
14 ALERT type 2 Indicator that the structure model may be wrong or deficient  
4 ALERT type 3 Indicator that the structure quality may be low  
3 ALERT type 4 Improvement, methodology, query or suggestion  
2 ALERT type 5 Informative message, check

---

---

It is advisable to attempt to resolve as many as possible of the alerts in all categories. Often the minor alerts point to easily fixed oversights, errors and omissions in your CIF or refinement strategy, so attention to these fine details can be worthwhile. In order to resolve some of the more serious problems it may be necessary to carry out additional measurements or structure refinements. However, the purpose of your study may justify the reported deviations and the more serious of these should normally be commented upon in the discussion or experimental section of a paper or in the "special\_details" fields of the CIF. checkCIF was carefully designed to identify outliers and unusual parameters, but every test has its limitations and alerts that are not important in a particular case may appear. Conversely, the absence of alerts does not guarantee there are no aspects of the results needing attention. It is up to the individual to critically assess their own results and, if necessary, seek expert advice.

### **Publication of your CIF in IUCr journals**

A basic structural check has been run on your CIF. These basic checks will be run on all CIFs submitted for publication in IUCr journals (*Acta Crystallographica*, *Journal of Applied Crystallography*, *Journal of Synchrotron Radiation*); however, if you intend to submit to *Acta Crystallographica Section C* or *E* or *IUCrData*, you should make sure that full publication checks are run on the final version of your CIF prior to submission.

### **Publication of your CIF in other journals**

Please refer to the *Notes for Authors* of the relevant journal for any special instructions relating to CIF submission.

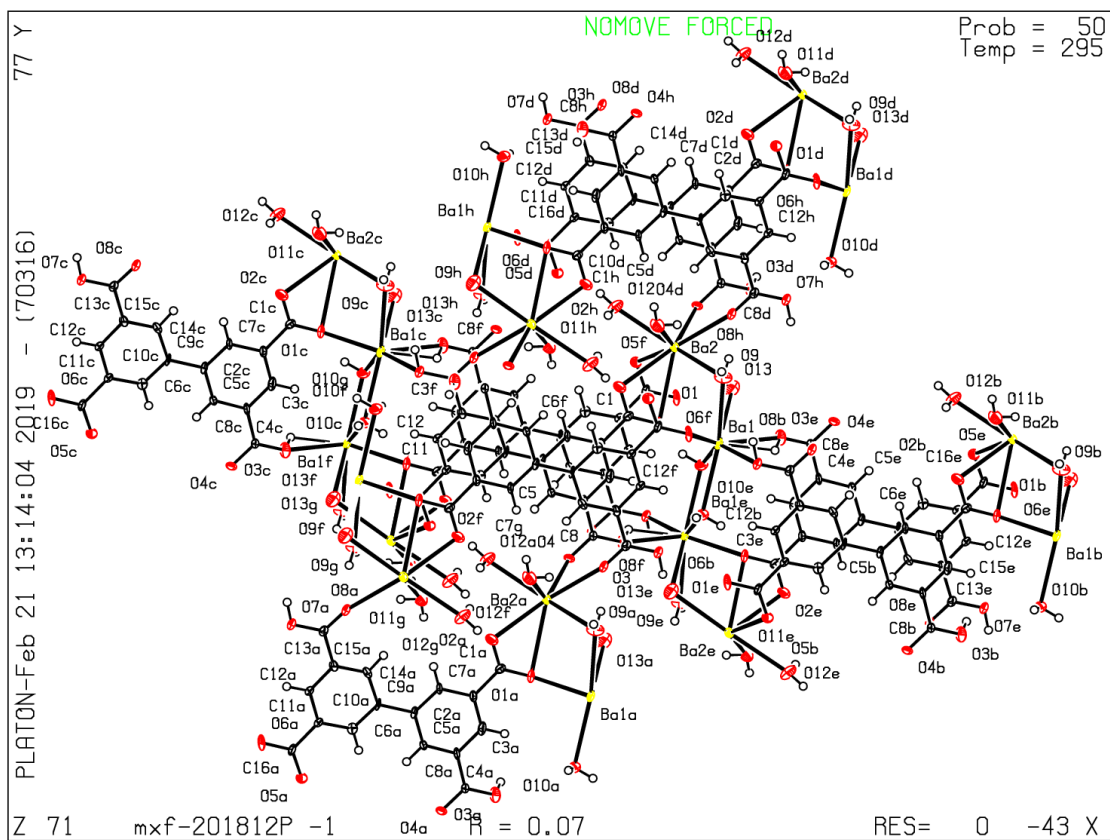

Supplement: Supplementary file 1 [file 1 › checkcif-1.pdf]
