# Supplementary material
Source: publisher figshare collection journal article supplement (https://tandf.figshare.com/articles/dataset/_/12212963)
Supplement: Supplementary file 1 [file 1]

Archive with 4 entries (4 files):
- 1.cif
- 2.cif
- checkcif-1.pdf
- checkcif-2.pdf
