# Supplementary material
Source: publisher figshare collection journal article supplement (https://tandf.figshare.com/articles/dataset/_/12212963)
Supplement: Supplementary file 1 [file 1 › 1.cif]

data_mxf-20181217
_audit_creation_date               2019-02-15
_audit_creation_method
;
Olex2 1.2-beta
(compiled 2018.05.29 svn.r3508 for OlexSys, GUI svn.r5506)
;
_shelx_SHELXL_version_number       '2018/3'
_audit_contact_author_address      ?
_audit_contact_author_email        ?
_audit_contact_author_name         ''
_audit_contact_author_phone        ?
_publ_contact_author_id_orcid      ?
_publ_section_references
;
Dolomanov, O.V., Bourhis, L.J., Gildea, R.J, Howard, J.A.K. & Puschmann, H.
 (2009), J. Appl. Cryst. 42, 339-341.

Sheldrick, G.M. (2015). Acta Cryst. A71, 3-8.

Sheldrick, G.M. (2015). Acta Cryst. C71, 3-8.
;
_chemical_name_common              ?
_chemical_name_systematic          ?
_chemical_formula_moiety           'C16 H16 Ba2 O13'
_chemical_formula_sum              'C16 H16 Ba2 O13'
_chemical_formula_weight           690.97
_chemical_melting_point            ?
loop_
  _atom_type_symbol
  _atom_type_description
  _atom_type_scat_dispersion_real
  _atom_type_scat_dispersion_imag
  _atom_type_scat_source
 'C' 'C' 0.0181 0.0091 'International Tables Vol C Tables 4.2.6.8 and 6.1.1.4'
 'H' 'H' 0.0000 0.0000 'International Tables Vol C Tables 4.2.6.8 and 6.1.1.4'
 'Ba' 'Ba' -1.0456 8.4617
 'International Tables Vol C Tables 4.2.6.8 and 6.1.1.4'
 'O' 'O' 0.0492 0.0322 'International Tables Vol C Tables 4.2.6.8 and 6.1.1.4'

_shelx_space_group_comment
;
The symmetry employed for this shelxl refinement is uniquely defined
by the following loop, which should always be used as a source of
symmetry information in preference to the above space-group names.
They are only intended as comments.
;
_space_group_crystal_system        'triclinic'
_space_group_IT_number             2
_space_group_name_H-M_alt          'P -1'
_space_group_name_Hall             '-P 1'
loop_
  _space_group_symop_operation_xyz
 'x, y, z'
 '-x, -y, -z'

_cell_length_a                     6.7743(3)
_cell_length_b                     11.1591(6)
_cell_length_c                     13.7721(4)
_cell_angle_alpha                  100.881(3)
_cell_angle_beta                   102.221(3)
_cell_angle_gamma                  105.571(4)
_cell_volume                       946.23(7)
_cell_formula_units_Z              2
_cell_measurement_reflns_used      5687
_cell_measurement_temperature      295.26(14)
_cell_measurement_theta_max        71.1730
_cell_measurement_theta_min        4.2420
_shelx_estimated_absorpt_T_max     ?
_shelx_estimated_absorpt_T_min     ?
_exptl_absorpt_coefficient_mu      32.846
_exptl_absorpt_correction_T_max    1.00000
_exptl_absorpt_correction_T_min    0.04564
_exptl_absorpt_correction_type     multi-scan
_exptl_absorpt_process_details
;
CrysAlisPro 1.171.39.46e (Rigaku Oxford Diffraction, 2018)
Empirical absorption correction using spherical harmonics,
 implemented in SCALE3 ABSPACK scaling algorithm.
;
_exptl_absorpt_special_details     ?
_exptl_crystal_colour              colorless
_exptl_crystal_density_diffrn      2.425
_exptl_crystal_density_meas        ?
_exptl_crystal_density_method      ?
_exptl_crystal_description         block
_exptl_crystal_F_000               656
_exptl_crystal_size_max            ?
_exptl_crystal_size_mid            ?
_exptl_crystal_size_min            ?
_exptl_transmission_factor_max     ?
_exptl_transmission_factor_min     ?
_diffrn_reflns_av_R_equivalents    0.0633
_diffrn_reflns_av_unetI/netI       0.0611
_diffrn_reflns_Laue_measured_fraction_full  0.975
_diffrn_reflns_Laue_measured_fraction_max  0.957
_diffrn_reflns_limit_h_max         5
_diffrn_reflns_limit_h_min         -8
_diffrn_reflns_limit_k_max         13
_diffrn_reflns_limit_k_min         -12
_diffrn_reflns_limit_l_max         16
_diffrn_reflns_limit_l_min         -16
_diffrn_reflns_number              8566
_diffrn_reflns_point_group_measured_fraction_full  0.975
_diffrn_reflns_point_group_measured_fraction_max  0.957
_diffrn_reflns_theta_full          67.684
_diffrn_reflns_theta_max           71.343
_diffrn_reflns_theta_min           3.401
_diffrn_ambient_environment        air
_diffrn_ambient_temperature        295.26(14)
_diffrn_detector                   'CCD plate'
_diffrn_detector_area_resol_mean   8.0528
_diffrn_detector_type              EosS2
_diffrn_measured_fraction_theta_full  0.975
_diffrn_measured_fraction_theta_max  0.957
_diffrn_measurement_details
;
List of Runs (angles in degrees, time in seconds):

  # Type    Start    End  Width  t~exp~   \w     \q     \k     \f   Frames
--------------------------------------------------------------------------
  1  \w   -103.00 -19.00   1.00    1.00    --  -35.37 -57.00-150.00   84
  2  \w   -103.00 -19.00   1.00    1.00    --  -35.37 -57.00-180.00   84
  3  \w    -52.00  32.00   1.00    1.00    --  -35.37  57.00  90.00   84
  4  \w    -52.00  32.00   1.00    1.00    --  -35.37  57.00 -30.00   84
  5  \w      6.00 107.00   1.00    1.00    --   35.37  19.00 120.00  101
  6  \w     16.00 105.00   1.00    1.00    --   35.37  38.00-180.00   89
  7  \w      1.00  74.00   1.00    1.00    --   35.37 -99.00   0.00   73
  8  \w     23.00  89.00   1.00    1.00    --   35.37-125.00-150.00   66
  9  \w     37.00 109.00   1.00    1.00    --  106.50 -95.00 150.00   72
 10  \w     88.00 173.00   1.00    1.00    --  106.50  61.00-150.00   85
 11  \w     40.00 125.00   1.00    1.00    --  106.50 -61.00 -90.00   85
 12  \w     40.00 125.00   1.00    1.00    --  106.50 -61.00-180.00   85
 13  \w     38.00 124.00   1.00    1.00    --  106.50 -45.00  90.00   86
 14  \w     88.00 173.00   1.00    1.00    --  106.50  61.00 -90.00   85
 15  \w     35.00 145.00   1.00    1.00    --  106.50 -15.00-120.00  110
 16  \w     37.00 112.00   1.00    1.00    --  106.50-111.00 -90.00   75
 17  \w     37.00 128.00   1.00    1.00    --  106.50 -30.00  60.00   91
 18  \w     37.00 112.00   1.00    1.00    --  106.50-111.00 120.00   75
 19  \w    100.00 176.00   1.00    1.00    --  106.50 111.00-180.00   76
 20  \w     37.00 112.00   1.00    1.00    --  106.50-111.00  30.00   75
 21  \w     57.00 151.00   1.00    1.00    --  106.50 178.00  90.00   94
 22  \w     85.00 176.00   1.00    1.00    --  106.50  30.00 -90.00   91
 23  \w   -103.00  -9.00   1.00    1.00    --  -35.37 -77.00 -60.00   94
 24  \w    -34.00  54.00   1.00    1.00    --   35.37 -38.00-180.00   88
 25  \w      9.00 103.00   1.00    1.00    --   35.37  77.00  60.00   94
 26  \w     16.00 105.00   1.00    1.00    --   35.37  38.00   0.00   89
;
_diffrn_measurement_device         'four-circle diffractometer'
_diffrn_measurement_device_type    'SuperNova, Dual, Cu at home/near, EosS2'
_diffrn_measurement_method         '\w scans'
_diffrn_orient_matrix_type        
 'CrysAlisPro convention (1999,Acta A55,543-557)'
_diffrn_orient_matrix_UB_11        -0.1059658000
_diffrn_orient_matrix_UB_12        -0.0597438000
_diffrn_orient_matrix_UB_13        -0.1161627000
_diffrn_orient_matrix_UB_21        -0.1859653000
_diffrn_orient_matrix_UB_22        -0.0931854000
_diffrn_orient_matrix_UB_23        0.0236768000
_diffrn_orient_matrix_UB_31        -0.1206870000
_diffrn_orient_matrix_UB_32        0.0989239000
_diffrn_orient_matrix_UB_33        -0.0014373000
_diffrn_radiation_monochromator    mirror
_diffrn_radiation_probe            x-ray
_diffrn_radiation_type             CuK\a
_diffrn_radiation_wavelength       1.54184
_diffrn_source                     'micro-focus sealed X-ray tube'
_diffrn_source_type                'SuperNova (Cu) X-ray Source'
_reflns_Friedel_coverage           0.000
_reflns_Friedel_fraction_full      .
_reflns_Friedel_fraction_max       .
_reflns_number_gt                  3190
_reflns_number_total               3510
_reflns_odcompleteness_completeness  100.00
_reflns_odcompleteness_iscentric   1
_reflns_odcompleteness_theta       66.97
_reflns_special_details
;
 Reflections were merged by SHELXL according to the crystal
 class for the calculation of statistics and refinement.
 
 _reflns_Friedel_fraction is defined as the number of unique
 Friedel pairs measured divided by the number that would be
 possible theoretically, ignoring centric projections and
 systematic absences.
;
_reflns_threshold_expression       'I > 2\s(I)'
_computing_cell_refinement         'CrysAlisPro 1.171.39.46e (Rigaku OD, 2018)'
_computing_data_collection         'CrysAlisPro 1.171.39.46e (Rigaku OD, 2018)'
_computing_data_reduction          'CrysAlisPro 1.171.39.46e (Rigaku OD, 2018)'
_computing_molecular_graphics      'Olex2 (Dolomanov et al., 2009)'
_computing_publication_material    'Olex2 (Dolomanov et al., 2009)'
_computing_structure_refinement    'ShelXL (Sheldrick, 2015)'
_computing_structure_solution      'SHELXT 2014/5 (Sheldrick, 2014)'
_refine_diff_density_max           4.794
_refine_diff_density_min           -2.682
_refine_diff_density_rms           0.406
_refine_ls_extinction_coef         .
_refine_ls_extinction_method       none
_refine_ls_goodness_of_fit_ref     1.043
_refine_ls_hydrogen_treatment      mixed
_refine_ls_matrix_type             full
_refine_ls_number_parameters       273
_refine_ls_number_reflns           3510
_refine_ls_number_restraints       12
_refine_ls_R_factor_all            0.0776
_refine_ls_R_factor_gt             0.0747
_refine_ls_restrained_S_all        1.042
_refine_ls_shift/su_max            0.002
_refine_ls_shift/su_mean           0.000
_refine_ls_structure_factor_coef   Fsqd
_refine_ls_weighting_details      
 'w=1/[\s^2^(Fo^2^)+(0.1746P)^2^] where P=(Fo^2^+2Fc^2^)/3'
_refine_ls_weighting_scheme        calc
_refine_ls_wR_factor_gt            0.2045
_refine_ls_wR_factor_ref           0.2120
_refine_special_details            ?
_olex2_refinement_description
;
1. Fixed Uiso
 At 1.2 times of:
  All C(H) groups
 At 1.5 times of:
  All O(H) groups, All O(H,H) groups
2. Uiso/Uaniso restraints and constraints
Uanis(C9) \\sim Ueq: with sigma of 0.01 and sigma for terminal atoms of 0.02
Uanis(O3) \\sim Ueq: with sigma of 0.01 and sigma for terminal atoms of 0.02
Uanis(C12) = Uanis(C11)
Uanis(O8) = Uanis(O7)
3.a Riding coordinates:
 O7(H7), O9(H9A,H9B), O10(H10A,H10B), O11(H11A,H11B)
3.b Free rotating group:
 O12(H12A,H12B)
3.c Aromatic/amide H refined with riding coordinates:
 C3(H3A), C5(H5), C7(H7A), C10(H10), C12(H12), C14(H14)
3.d Idealised tetrahedral OH refined as rotating group:
 O3(H3)
;
_atom_sites_solution_hydrogens     mixed
_atom_sites_solution_primary       ?
_atom_sites_solution_secondary     ?
loop_
  _atom_site_label
  _atom_site_type_symbol
  _atom_site_fract_x
  _atom_site_fract_y
  _atom_site_fract_z
  _atom_site_U_iso_or_equiv
  _atom_site_adp_type
  _atom_site_occupancy
  _atom_site_site_symmetry_order
  _atom_site_calc_flag
  _atom_site_refinement_flags_posn
  _atom_site_refinement_flags_adp
  _atom_site_refinement_flags_occupancy
  _atom_site_disorder_assembly
  _atom_site_disorder_group
 Ba1 Ba 0.79992(7) 0.71069(4) 0.04058(3) 0.0167(2) Uani 1 1 d . . . . .
 Ba2 Ba 0.69862(7) 0.99393(4) 0.27494(3) 0.0175(2) Uani 1 1 d . . . . .
 O1 O 0.6674(10) 0.7086(6) 0.2117(4) 0.0226(13) Uani 1 1 d . . . . .
 O2 O 0.8272(11) 0.8176(6) 0.3749(5) 0.0334(15) Uani 1 1 d . . . . .
 O3 O 0.3611(11) 0.2271(6) 0.1246(5) 0.0333(15) Uani 1 1 d . U . . .
 H3 H 0.275922 0.267243 0.120382 0.01(2) Uiso 1 1 calc GR . . . .
 O4 O 0.4118(9) 0.1263(5) 0.2473(4) 0.0199(12) Uani 1 1 d . . . . .
 O5 O 0.6431(9) 0.1346(5) 0.6722(4) 0.0219(13) Uani 1 1 d . . . . .
 O6 O 0.8080(10) 0.2386(6) 0.8365(5) 0.0258(14) Uani 1 1 d . . . . .
 O7 O 1.1034(10) 0.7126(6) 0.9377(4) 0.0215(9) Uani 1 1 d . . . . .
 H7 H 1.195661 0.795714 0.985571 0.032 Uiso 1 1 d R . . . .
 O8 O 1.1429(9) 0.8186(5) 0.8177(4) 0.0215(9) Uani 1 1 d . . . . .
 O12 O 0.7728(10) 1.0851(7) 0.4873(5) 0.0320(14) Uani 1 1 d . . . . .
 H12A H 0.883087 1.062657 0.503844 0.048 Uiso 1 1 d G . . . .
 H12B H 0.741036 1.114579 0.541442 0.048 Uiso 1 1 d G . . . .
 O13 O 0.5172(11) 0.8841(7) 0.0554(5) 0.0358(16) Uani 1 1 d . . . . .
 C1 C 0.7345(13) 0.7137(8) 0.3067(6) 0.0201(17) Uani 1 1 d . . . . .
 C2 C 0.6947(12) 0.5879(7) 0.3376(6) 0.0150(15) Uani 1 1 d . . . . .
 C3 C 0.5907(13) 0.4718(8) 0.2643(6) 0.0212(17) Uani 1 1 d . . . . .
 H3A H 0.546781 0.470377 0.195235 0.025 Uiso 1 1 calc R . . . .
 C4 C 0.5513(12) 0.3563(7) 0.2938(6) 0.0163(15) Uani 1 1 d . . . . .
 C5 C 0.6192(12) 0.3622(7) 0.3972(5) 0.0144(14) Uani 1 1 d . . . . .
 H5 H 0.596918 0.285645 0.417161 0.017 Uiso 1 1 calc R . . . .
 C6 C 0.7193(11) 0.4779(8) 0.4721(6) 0.0125(15) Uani 1 1 d . . . . .
 C7 C 0.7535(12) 0.5889(7) 0.4407(5) 0.0150(15) Uani 1 1 d . . . . .
 H7A H 0.818265 0.667600 0.489899 0.018 Uiso 1 1 calc R . . . .
 C8 C 0.4338(13) 0.2302(7) 0.2169(5) 0.0176(15) Uani 1 1 d . . . . .
 C9 C 0.7884(12) 0.4797(8) 0.5821(5) 0.0149(15) Uani 1 1 d . U . . .
 C10 C 0.7419(11) 0.3657(7) 0.6132(6) 0.0154(15) Uani 1 1 d . . . . .
 H10 H 0.671316 0.288585 0.562779 0.018 Uiso 1 1 calc R . . . .
 C11 C 0.7942(13) 0.3610(8) 0.7134(6) 0.0159(11) Uani 1 1 d . . . . .
 C12 C 0.9131(12) 0.4762(7) 0.7884(5) 0.0159(11) Uani 1 1 d . . . . .
 H12 H 0.957455 0.474763 0.856758 0.019 Uiso 1 1 calc R . . . .
 C13 C 0.9655(11) 0.5924(7) 0.7622(5) 0.0153(15) Uani 1 1 d . . . . .
 C14 C 0.8994(12) 0.5931(7) 0.6607(6) 0.0149(15) Uani 1 1 d . . . . .
 H14 H 0.929363 0.671544 0.643735 0.018 Uiso 1 1 calc R . . . .
 C15 C 1.0763(12) 0.7169(7) 0.8433(5) 0.0147(14) Uani 1 1 d . . . . .
 C16 C 0.7475(13) 0.2358(8) 0.7429(6) 0.0169(16) Uani 1 1 d . . . . .
 O9 O 0.9882(10) 0.9684(6) 0.1314(5) 0.0348(16) Uani 1 1 d . . . . .
 H9A H 0.943004 1.032714 0.137949 0.052 Uiso 1 1 d R . . . .
 H9B H 1.123104 1.001134 0.153559 0.052 Uiso 1 1 d R . . . .
 O10 O 0.6666(9) 0.4323(5) -0.0205(4) 0.0258(13) Uani 1 1 d . . . . .
 H10A H 0.804228 0.432585 0.001494 0.039 Uiso 1 1 d R . . . .
 H10B H 0.640868 0.409545 -0.085536 0.039 Uiso 1 1 d R . . . .
 O11 O 1.1324(10) 1.1037(6) 0.3829(5) 0.0307(14) Uani 1 1 d . . . . .
 H11A H 1.072012 1.117144 0.327154 0.046 Uiso 1 1 d R . . . .
 H11B H 1.221542 1.174164 0.422304 0.046 Uiso 1 1 d R . . . .

loop_
  _atom_site_aniso_label
  _atom_site_aniso_U_11
  _atom_site_aniso_U_22
  _atom_site_aniso_U_33
  _atom_site_aniso_U_23
  _atom_site_aniso_U_13
  _atom_site_aniso_U_12
 Ba1 0.0250(4) 0.0188(4) 0.0068(3) 0.0033(2) 0.0031(2) 0.0089(3)
 Ba2 0.0281(4) 0.0149(4) 0.0142(3) 0.0068(2) 0.0082(2) 0.0104(3)
 O1 0.037(3) 0.025(3) 0.010(2) 0.009(2) 0.009(2) 0.010(3)
 O2 0.054(4) 0.016(3) 0.023(3) 0.006(2) -0.003(3) 0.011(3)
 O3 0.043(4) 0.037(4) 0.017(3) 0.012(3) -0.009(3) 0.018(3)
 O4 0.030(3) 0.009(2) 0.016(2) 0.002(2) -0.001(2) 0.006(2)
 O5 0.025(3) 0.013(3) 0.018(3) 0.002(2) 0.001(2) -0.003(2)
 O6 0.030(3) 0.037(4) 0.015(3) 0.018(3) 0.002(2) 0.016(3)
 O7 0.035(2) 0.020(2) 0.0091(17) 0.0032(15) 0.0063(16) 0.0072(17)
 O8 0.035(2) 0.020(2) 0.0091(17) 0.0032(15) 0.0063(16) 0.0072(17)
 O12 0.031(3) 0.040(4) 0.021(3) -0.005(2) 0.006(2) 0.015(3)
 O13 0.035(4) 0.040(4) 0.026(3) 0.004(3) 0.008(3) 0.007(3)
 C1 0.032(4) 0.019(4) 0.012(3) 0.002(3) 0.005(3) 0.015(3)
 C2 0.019(4) 0.019(4) 0.012(3) 0.009(3) 0.008(3) 0.009(3)
 C3 0.026(4) 0.032(5) 0.011(3) 0.010(3) 0.005(3) 0.016(4)
 C4 0.024(4) 0.020(4) 0.011(3) 0.011(3) 0.007(3) 0.011(3)
 C5 0.018(4) 0.011(3) 0.010(3) 0.005(2) 0.001(3) 0.000(3)
 C6 0.010(3) 0.023(4) 0.007(3) 0.006(3) 0.002(3) 0.008(3)
 C7 0.021(4) 0.018(4) 0.008(3) 0.008(3) 0.003(3) 0.006(3)
 C8 0.029(4) 0.013(4) 0.009(3) 0.004(3) 0.003(3) 0.005(3)
 C9 0.018(4) 0.024(4) 0.003(3) 0.005(3) 0.000(3) 0.009(3)
 C10 0.009(3) 0.018(4) 0.015(3) 0.004(3) 0.000(3) 0.001(3)
 C11 0.023(3) 0.013(3) 0.008(2) 0.000(2) 0.002(2) 0.003(2)
 C12 0.023(3) 0.013(3) 0.008(2) 0.000(2) 0.002(2) 0.003(2)
 C13 0.016(4) 0.018(4) 0.014(3) 0.008(3) 0.000(3) 0.009(3)
 C14 0.017(4) 0.015(4) 0.019(4) 0.011(3) 0.008(3) 0.008(3)
 C15 0.019(4) 0.021(4) 0.012(3) 0.005(3) 0.008(3) 0.015(3)
 C16 0.023(4) 0.022(4) 0.007(3) 0.004(3) 0.004(3) 0.010(3)
 O9 0.034(4) 0.022(3) 0.044(4) 0.002(3) 0.007(3) 0.009(3)
 O10 0.032(3) 0.019(3) 0.020(3) 0.000(2) 0.000(2) 0.006(2)
 O11 0.031(3) 0.027(3) 0.034(3) 0.012(3) 0.004(3) 0.009(3)

_geom_special_details
;
 All esds (except the esd in the dihedral angle between two l.s. planes)
 are estimated using the full covariance matrix.  The cell esds are taken
 into account individually in the estimation of esds in distances, angles
 and torsion angles; correlations between esds in cell parameters are only
 used when they are defined by crystal symmetry.  An approximate (isotropic)
 treatment of cell esds is used for estimating esds involving l.s. planes.
;
loop_
  _geom_bond_atom_site_label_1
  _geom_bond_atom_site_label_2
  _geom_bond_distance
  _geom_bond_site_symmetry_2
  _geom_bond_publ_flag
 Ba1 Ba2 4.3737(6) . ?
 Ba1 O1 2.695(5) . ?
 Ba1 O3 2.608(6) 2_665 ?
 Ba1 H3 2.243(7) 2_665 ?
 Ba1 O6 2.678(6) 2_766 ?
 Ba1 O7 2.731(6) 1_554 ?
 Ba1 O13 3.075(7) . ?
 Ba1 O9 2.731(6) . ?
 Ba1 O10 2.891(6) . ?
 Ba1 O10 3.060(6) 2_665 ?
 Ba2 O1 3.074(6) . ?
 Ba2 O2 2.822(6) . ?
 Ba2 O4 2.746(6) 1_565 ?
 Ba2 O5 2.696(6) 2_666 ?
 Ba2 O8 2.745(5) 2_776 ?
 Ba2 O12 2.797(6) . ?
 Ba2 O13 2.894(7) . ?
 Ba2 C1 3.303(8) . ?
 Ba2 C16 3.325(8) 2_666 ?
 Ba2 O9 3.093(7) . ?
 Ba2 H9A 2.7809 . ?
 Ba2 O11 2.806(6) . ?
 Ba2 H11A 2.4074 . ?
 O1 C1 1.276(10) . ?
 O2 C1 1.253(10) . ?
 O3 H3 0.8200 . ?
 O3 C8 1.252(10) . ?
 O4 C8 1.288(9) . ?
 O5 C16 1.260(9) . ?
 O6 C16 1.259(10) . ?
 O7 H7 0.9847 . ?
 O7 C15 1.285(9) . ?
 O8 C15 1.250(9) . ?
 O12 H12A 0.8499 . ?
 O12 H12B 0.8509 . ?
 C1 C2 1.514(11) . ?
 C2 C3 1.382(11) . ?
 C2 C7 1.389(10) . ?
 C3 H3A 0.9300 . ?
 C3 C4 1.398(11) . ?
 C4 C5 1.384(10) . ?
 C4 C8 1.488(10) . ?
 C5 H5 0.9300 . ?
 C5 C6 1.386(11) . ?
 C6 C7 1.366(10) . ?
 C6 C9 1.483(10) . ?
 C7 H7A 0.9300 . ?
 C9 C10 1.396(11) . ?
 C9 C14 1.402(11) . ?
 C10 H10 0.9300 . ?
 C10 C11 1.365(12) . ?
 C11 C12 1.400(10) . ?
 C11 C16 1.500(12) . ?
 C12 H12 0.9300 . ?
 C12 C13 1.386(11) . ?
 C13 C14 1.377(10) . ?
 C13 C15 1.496(10) . ?
 C14 H14 0.9300 . ?
 O9 H9A 0.8501 . ?
 O9 H9B 0.8500 . ?
 O10 H10A 0.9164 . ?
 O10 H10B 0.8500 . ?
 O11 H11A 0.8498 . ?
 O11 H11B 0.8501 . ?

loop_
  _geom_angle_atom_site_label_1
  _geom_angle_atom_site_label_2
  _geom_angle_atom_site_label_3
  _geom_angle
  _geom_angle_site_symmetry_1
  _geom_angle_site_symmetry_3
  _geom_angle_publ_flag
 Ba2 Ba1 H3 116.3(19) . 2_665 ?
 O1 Ba1 Ba2 44.06(13) . . ?
 O1 Ba1 H3 146(2) . 2_665 ?
 O1 Ba1 O7 151.67(18) . 1_554 ?
 O1 Ba1 O13 70.65(18) . . ?
 O1 Ba1 O9 84.02(19) . . ?
 O1 Ba1 O10 60.60(18) . 2_665 ?
 O1 Ba1 O10 91.36(17) . . ?
 O3 Ba1 Ba2 100.08(15) 2_665 . ?
 O3 Ba1 O1 129.2(2) 2_665 . ?
 O3 Ba1 H3 17(2) 2_665 2_665 ?
 O3 Ba1 O6 135.7(2) 2_665 2_766 ?
 O3 Ba1 O7 78.0(2) 2_665 1_554 ?
 O3 Ba1 O13 61.6(2) 2_665 . ?
 O3 Ba1 O9 87.3(2) 2_665 . ?
 O3 Ba1 O10 104.23(18) 2_665 . ?
 O3 Ba1 O10 83.84(19) 2_665 2_665 ?
 O6 Ba1 Ba2 88.26(14) 2_766 . ?
 O6 Ba1 O1 86.05(19) 2_766 . ?
 O6 Ba1 H3 125.5(15) 2_766 2_665 ?
 O6 Ba1 O7 66.20(18) 2_766 1_554 ?
 O6 Ba1 O13 125.69(19) 2_766 . ?
 O6 Ba1 O9 68.5(2) 2_766 . ?
 O6 Ba1 O10 140.46(17) 2_766 2_665 ?
 O6 Ba1 O10 100.03(18) 2_766 . ?
 O7 Ba1 Ba2 134.94(12) 1_554 . ?
 O7 Ba1 H3 62(2) 1_554 2_665 ?
 O7 Ba1 O13 129.93(18) 1_554 . ?
 O7 Ba1 O9 90.6(2) 1_554 . ?
 O7 Ba1 O10 140.98(16) 1_554 2_665 ?
 O7 Ba1 O10 88.14(17) 1_554 . ?
 O13 Ba1 Ba2 41.29(13) . . ?
 O13 Ba1 H3 79(2) . 2_665 ?
 O9 Ba1 Ba2 44.55(14) . . ?
 O9 Ba1 H3 95.0(8) . 2_665 ?
 O9 Ba1 O13 60.97(19) . . ?
 O9 Ba1 O10 122.92(18) . 2_665 ?
 O9 Ba1 O10 167.88(19) . . ?
 O10 Ba1 Ba2 134.28(12) . . ?
 O10 Ba1 Ba2 81.95(11) 2_665 . ?
 O10 Ba1 H3 95.2(10) . 2_665 ?
 O10 Ba1 H3 92.8(12) 2_665 2_665 ?
 O10 Ba1 O13 65.41(16) 2_665 . ?
 O10 Ba1 O13 127.84(17) . . ?
 O10 Ba1 O10 63.2(2) . 2_665 ?
 Ba1 Ba2 H9A 50.6 . . ?
 Ba1 Ba2 H11A 90.8 . . ?
 O1 Ba2 Ba1 37.56(10) . . ?
 O1 Ba2 C1 22.73(17) . . ?
 O1 Ba2 C16 59.76(18) . 2_666 ?
 O1 Ba2 O9 72.15(16) . . ?
 O1 Ba2 H9A 86.6 . . ?
 O1 Ba2 H11A 106.8 . . ?
 O2 Ba2 Ba1 73.56(14) . . ?
 O2 Ba2 O1 44.01(17) . . ?
 O2 Ba2 O13 112.1(2) . . ?
 O2 Ba2 C1 21.84(18) . . ?
 O2 Ba2 C16 74.1(2) . 2_666 ?
 O2 Ba2 O9 91.4(2) . . ?
 O2 Ba2 H9A 106.1 . . ?
 O2 Ba2 H11A 85.4 . . ?
 O4 Ba2 Ba1 127.39(11) 1_565 . ?
 O4 Ba2 O1 134.30(16) 1_565 . ?
 O4 Ba2 O2 145.46(19) 1_565 . ?
 O4 Ba2 O12 88.17(18) 1_565 . ?
 O4 Ba2 O13 82.9(2) 1_565 . ?
 O4 Ba2 C1 141.84(18) 1_565 . ?
 O4 Ba2 C16 80.02(18) 1_565 2_666 ?
 O4 Ba2 O9 122.25(18) 1_565 . ?
 O4 Ba2 H9A 108.1 1_565 . ?
 O4 Ba2 O11 125.45(17) 1_565 . ?
 O4 Ba2 H11A 117.4 1_565 . ?
 O5 Ba2 Ba1 105.91(12) 2_666 . ?
 O5 Ba2 O1 74.84(17) 2_666 . ?
 O5 Ba2 O2 74.0(2) 2_666 . ?
 O5 Ba2 O4 73.68(17) 2_666 1_565 ?
 O5 Ba2 O8 145.81(18) 2_666 2_776 ?
 O5 Ba2 O12 71.93(18) 2_666 . ?
 O5 Ba2 O13 95.70(18) 2_666 . ?
 O5 Ba2 C1 69.5(2) 2_666 . ?
 O5 Ba2 C16 21.02(17) 2_666 2_666 ?
 O5 Ba2 O9 144.15(17) 2_666 . ?
 O5 Ba2 H9A 152.8 2_666 . ?
 O5 Ba2 O11 132.12(18) 2_666 . ?
 O5 Ba2 H11A 148.0 2_666 . ?
 O8 Ba2 Ba1 89.05(11) 2_776 . ?
 O8 Ba2 O1 126.50(15) 2_776 . ?
 O8 Ba2 O2 140.24(19) 2_776 . ?
 O8 Ba2 O4 72.86(17) 2_776 1_565 ?
 O8 Ba2 O12 113.62(18) 2_776 . ?
 O8 Ba2 O13 73.40(18) 2_776 . ?
 O8 Ba2 C1 140.87(18) 2_776 . ?
 O8 Ba2 C16 141.45(18) 2_776 2_666 ?
 O8 Ba2 O9 56.38(17) 2_776 . ?
 O8 Ba2 H9A 41.0 2_776 . ?
 O8 Ba2 O11 75.09(18) 2_776 . ?
 O8 Ba2 H11A 58.8 2_776 . ?
 O12 Ba2 Ba1 143.15(14) . . ?
 O12 Ba2 O1 112.27(18) . . ?
 O12 Ba2 O2 70.6(2) . . ?
 O12 Ba2 O13 166.43(19) . . ?
 O12 Ba2 C1 89.9(2) . . ?
 O12 Ba2 C16 91.94(19) . 2_666 ?
 O12 Ba2 O9 134.37(18) . . ?
 O12 Ba2 H9A 134.6 . . ?
 O12 Ba2 O11 66.22(18) . . ?
 O12 Ba2 H11A 78.4 . . ?
 O13 Ba2 Ba1 44.53(15) . . ?
 O13 Ba2 O1 68.24(18) . . ?
 O13 Ba2 C1 90.9(2) . . ?
 O13 Ba2 C16 76.53(19) . 2_666 ?
 O13 Ba2 O9 59.17(19) . . ?
 O13 Ba2 H9A 58.5 . . ?
 O13 Ba2 H11A 114.8 . . ?
 C1 Ba2 Ba1 56.94(13) . . ?
 C1 Ba2 C16 62.0(2) . 2_666 ?
 C1 Ba2 H9A 100.2 . . ?
 C1 Ba2 H11A 99.4 . . ?
 C16 Ba2 Ba1 86.10(13) 2_666 . ?
 C16 Ba2 H9A 131.9 2_666 . ?
 C16 Ba2 H11A 159.3 2_666 . ?
 O9 Ba2 Ba1 38.28(11) . . ?
 O9 Ba2 C1 84.68(19) . . ?
 O9 Ba2 C16 123.84(18) . 2_666 ?
 O9 Ba2 H9A 15.5 . . ?
 O9 Ba2 H11A 58.1 . . ?
 H9A Ba2 H11A 56.3 . . ?
 O11 Ba2 Ba1 94.49(13) . . ?
 O11 Ba2 O1 100.24(17) . . ?
 O11 Ba2 O2 71.10(18) . . ?
 O11 Ba2 O13 127.35(19) . . ?
 O11 Ba2 C1 87.85(19) . . ?
 O11 Ba2 C16 143.40(19) . 2_666 ?
 O11 Ba2 O9 68.33(18) . . ?
 O11 Ba2 H9A 70.0 . . ?
 O11 Ba2 H11A 16.6 . . ?
 Ba1 O1 Ba2 98.38(17) . . ?
 C1 O1 Ba1 141.5(5) . . ?
 C1 O1 Ba2 88.8(5) . . ?
 C1 O2 Ba2 101.2(5) . . ?
 Ba1 O3 H3 55.2 2_665 . ?
 C8 O3 Ba1 162.1(6) . 2_665 ?
 C8 O3 H3 109.5 . . ?
 C8 O4 Ba2 127.8(5) . 1_545 ?
 C16 O5 Ba2 108.9(5) . 2_666 ?
 C16 O6 Ba1 130.4(5) . 2_766 ?
 Ba1 O7 H7 90.0 1_556 . ?
 C15 O7 Ba1 124.1(5) . 1_556 ?
 C15 O7 H7 111.8 . . ?
 C15 O8 Ba2 167.2(5) . 2_776 ?
 Ba2 O12 H12A 95.4 . . ?
 Ba2 O12 H12B 154.7 . . ?
 H12A O12 H12B 109.4 . . ?
 Ba2 O13 Ba1 94.2(2) . . ?
 O1 C1 Ba2 68.5(4) . . ?
 O1 C1 C2 118.0(7) . . ?
 O2 C1 Ba2 56.9(4) . . ?
 O2 C1 O1 122.9(8) . . ?
 O2 C1 C2 119.1(7) . . ?
 C2 C1 Ba2 161.5(5) . . ?
 C3 C2 C1 120.5(6) . . ?
 C3 C2 C7 119.4(7) . . ?
 C7 C2 C1 120.0(7) . . ?
 C2 C3 H3A 120.0 . . ?
 C2 C3 C4 120.1(7) . . ?
 C4 C3 H3A 120.0 . . ?
 C3 C4 C8 121.2(6) . . ?
 C5 C4 C3 118.3(7) . . ?
 C5 C4 C8 120.5(6) . . ?
 C4 C5 H5 118.8 . . ?
 C4 C5 C6 122.4(7) . . ?
 C6 C5 H5 118.8 . . ?
 C5 C6 C9 120.6(7) . . ?
 C7 C6 C5 117.7(7) . . ?
 C7 C6 C9 121.6(7) . . ?
 C2 C7 H7A 119.0 . . ?
 C6 C7 C2 122.0(7) . . ?
 C6 C7 H7A 119.0 . . ?
 O3 C8 O4 121.6(7) . . ?
 O3 C8 C4 119.7(7) . . ?
 O4 C8 C4 118.7(6) . . ?
 C10 C9 C6 120.8(7) . . ?
 C10 C9 C14 115.9(7) . . ?
 C14 C9 C6 123.3(7) . . ?
 C9 C10 H10 118.1 . . ?
 C11 C10 C9 123.8(7) . . ?
 C11 C10 H10 118.1 . . ?
 C10 C11 C12 117.9(8) . . ?
 C10 C11 C16 121.9(7) . . ?
 C12 C11 C16 119.9(7) . . ?
 C11 C12 H12 119.6 . . ?
 C13 C12 C11 120.9(7) . . ?
 C13 C12 H12 119.6 . . ?
 C12 C13 C15 120.9(6) . . ?
 C14 C13 C12 118.9(7) . . ?
 C14 C13 C15 119.9(7) . . ?
 C9 C14 H14 118.8 . . ?
 C13 C14 C9 122.4(7) . . ?
 C13 C14 H14 118.8 . . ?
 O7 C15 C13 117.3(7) . . ?
 O8 C15 O7 122.9(7) . . ?
 O8 C15 C13 119.7(6) . . ?
 O5 C16 Ba2 50.1(4) . 2_666 ?
 O5 C16 C11 117.4(7) . . ?
 O6 C16 Ba2 88.0(5) . 2_666 ?
 O6 C16 O5 124.2(8) . . ?
 O6 C16 C11 118.3(7) . . ?
 C11 C16 Ba2 134.0(5) . 2_666 ?
 Ba1 O9 Ba2 97.2(2) . . ?
 Ba1 O9 H9A 134.1 . . ?
 Ba1 O9 H9B 120.9 . . ?
 Ba2 O9 H9A 60.9 . . ?
 Ba2 O9 H9B 121.5 . . ?
 H9A O9 H9B 104.5 . . ?
 Ba1 O10 Ba1 116.8(2) . 2_665 ?
 Ba1 O10 H10A 144.6 2_665 . ?
 Ba1 O10 H10A 91.6 . . ?
 Ba1 O10 H10B 107.2 . . ?
 Ba1 O10 H10B 89.5 2_665 . ?
 H10A O10 H10B 102.4 . . ?
 Ba2 O11 H11A 54.0 . . ?
 Ba2 O11 H11B 140.9 . . ?
 H11A O11 H11B 109.4 . . ?

loop_
  _geom_torsion_atom_site_label_1
  _geom_torsion_atom_site_label_2
  _geom_torsion_atom_site_label_3
  _geom_torsion_atom_site_label_4
  _geom_torsion
  _geom_torsion_site_symmetry_1
  _geom_torsion_site_symmetry_2
  _geom_torsion_site_symmetry_3
  _geom_torsion_site_symmetry_4
  _geom_torsion_publ_flag
 Ba1 O1 C1 Ba2 101.9(7) . . . . ?
 Ba1 O1 C1 O2 84.3(11) . . . . ?
 Ba1 O1 C1 C2 -97.1(9) . . . . ?
 Ba1 O3 C8 O4 149.7(15) 2_665 . . . ?
 Ba1 O3 C8 C4 -31(2) 2_665 . . . ?
 Ba1 O6 C16 Ba2 147.8(5) 2_766 . . 2_666 ?
 Ba1 O6 C16 O5 110.9(9) 2_766 . . . ?
 Ba1 O6 C16 C11 -71.8(10) 2_766 . . . ?
 Ba1 O7 C15 O8 99.2(8) 1_556 . . . ?
 Ba1 O7 C15 C13 -82.8(7) 1_556 . . . ?
 Ba2 O1 C1 O2 -17.6(9) . . . . ?
 Ba2 O1 C1 C2 160.9(7) . . . . ?
 Ba2 O2 C1 O1 19.7(9) . . . . ?
 Ba2 O2 C1 C2 -158.9(6) . . . . ?
 Ba2 O4 C8 O3 96.2(9) 1_545 . . . ?
 Ba2 O4 C8 C4 -82.9(8) 1_545 . . . ?
 Ba2 O5 C16 O6 51.5(10) 2_666 . . . ?
 Ba2 O5 C16 C11 -125.8(6) 2_666 . . . ?
 Ba2 O8 C15 O7 146.7(19) 2_776 . . . ?
 Ba2 O8 C15 C13 -31(3) 2_776 . . . ?
 Ba2 C1 C2 C3 106.9(15) . . . . ?
 Ba2 C1 C2 C7 -69.9(17) . . . . ?
 O1 C1 C2 C3 0.7(12) . . . . ?
 O1 C1 C2 C7 -176.2(7) . . . . ?
 O2 C1 C2 C3 179.3(8) . . . . ?
 O2 C1 C2 C7 2.4(12) . . . . ?
 C1 C2 C3 C4 -178.9(7) . . . . ?
 C1 C2 C7 C6 179.5(7) . . . . ?
 C2 C3 C4 C5 -0.1(12) . . . . ?
 C2 C3 C4 C8 178.1(7) . . . . ?
 C3 C2 C7 C6 2.6(12) . . . . ?
 C3 C4 C5 C6 1.7(12) . . . . ?
 C3 C4 C8 O3 -2.8(12) . . . . ?
 C3 C4 C8 O4 176.3(7) . . . . ?
 C4 C5 C6 C7 -1.1(12) . . . . ?
 C4 C5 C6 C9 179.7(7) . . . . ?
 C5 C4 C8 O3 175.3(8) . . . . ?
 C5 C4 C8 O4 -5.5(12) . . . . ?
 C5 C6 C7 C2 -1.1(12) . . . . ?
 C5 C6 C9 C10 -4.2(12) . . . . ?
 C5 C6 C9 C14 176.8(7) . . . . ?
 C6 C9 C10 C11 -177.6(8) . . . . ?
 C6 C9 C14 C13 -178.8(7) . . . . ?
 C7 C2 C3 C4 -2.0(12) . . . . ?
 C7 C6 C9 C10 176.6(8) . . . . ?
 C7 C6 C9 C14 -2.4(12) . . . . ?
 C8 C4 C5 C6 -176.5(7) . . . . ?
 C9 C6 C7 C2 178.2(7) . . . . ?
 C9 C10 C11 C12 -4.2(14) . . . . ?
 C9 C10 C11 C16 -177.9(7) . . . . ?
 C10 C9 C14 C13 2.2(12) . . . . ?
 C10 C11 C12 C13 3.6(13) . . . . ?
 C10 C11 C16 Ba2 -65.1(11) . . . 2_666 ?
 C10 C11 C16 O5 -5.3(13) . . . . ?
 C10 C11 C16 O6 177.2(8) . . . . ?
 C11 C12 C13 C14 -0.2(12) . . . . ?
 C11 C12 C13 C15 174.7(7) . . . . ?
 C12 C11 C16 Ba2 121.4(7) . . . 2_666 ?
 C12 C11 C16 O5 -178.8(7) . . . . ?
 C12 C11 C16 O6 3.7(12) . . . . ?
 C12 C13 C14 C9 -2.7(12) . . . . ?
 C12 C13 C15 O7 -6.0(11) . . . . ?
 C12 C13 C15 O8 172.1(7) . . . . ?
 C14 C9 C10 C11 1.4(13) . . . . ?
 C14 C13 C15 O7 168.9(7) . . . . ?
 C14 C13 C15 O8 -13.0(11) . . . . ?
 C15 C13 C14 C9 -177.7(7) . . . . ?
 C16 C11 C12 C13 177.3(7) . . . . ?

_shelx_res_file
;
TITL mxf-20181217_a.res in P-1
    mxf-20181217.res
    created by SHELXL-2018/3 at 15:39:21 on 15-Feb-2019
REM Old TITL MXF-20181217 in P-1 #2
REM SHELXT solution in P-1
REM R1 0.132, Rweak 0.004, Alpha 0.120, Orientation as input
REM Formula found by SHELXT: C17 N2 O10 Ba2
CELL 1.54184 6.7743 11.1591 13.7721 100.881 102.221 105.571
ZERR 2 0.0003 0.0006 0.0004 0.003 0.003 0.004
LATT 1
SFAC C H Ba O
UNIT 32 32 4 26
ISOR 0.01 0.02 C9
ISOR 0.01 0.02 O3
EADP C12 C11
EADP O8 O7

L.S. 14
PLAN  5
BOND $H
LIST 6
MORE -1
CONF
fmap 2
acta
OMIT 5 5 1
OMIT 3 0 6
OMIT 0 1 1
OMIT 3 7 2
OMIT 3 5 3
OMIT 2 8 3
OMIT 4 6 2
OMIT 7 -8 4
OMIT 0 8 4
OMIT 4 2 3
OMIT 6 2 1
OMIT 6 1 1
OMIT 5 -5 7
OMIT 3 1 6
OMIT 1 9 3
OMIT -4 13 0
OMIT 2 9 2
OMIT 5 -10 7
OMIT 0 10 3
OMIT 4 -3 7
OMIT 4 7 1
OMIT 6 -9 6
OMIT 1 9 4
OMIT 3 -3 6
OMIT -2 4 7
OMIT 2 6 3
OMIT 6 3 0
OMIT 5 6 0
OMIT 5 -7 7
OMIT 2 1 6
OMIT -3 1 9
OMIT 1 5 5
OMIT 1 8 3
OMIT 3 -2 6
OMIT -3 13 1
OMIT 2 3 6
OMIT 2 7 4
OMIT 4 8 1
OMIT -3 2 8
OMIT 0 0 2
OMIT 2 10 2
OMIT 4 -12 7
OMIT 0 3 6
OMIT 5 -4 3
OMIT 1 8 4
OMIT 0 10 4
OMIT 5 -2 3
OMIT 5 1 2
OMIT -3 -8 11
OMIT 3 8 2
OMIT 0 0 3
OMIT -6 2 9
OMIT -6 2 8
OMIT -2 -5 11
OMIT 4 -6 8
OMIT 3 3 5
OMIT 3 -9 9
OMIT -3 0 1
OMIT -7 -3 1
OMIT -4 -9 1
OMIT 5 4 1
OMIT -2 -3 10
OMIT 5 -8 7
OMIT 4 -8 8
OMIT 0 2 5
OMIT 5 6 1
OMIT 2 4 5
OMIT 0 5 6
OMIT 7 -2 1
OMIT 0 9 4
OMIT 1 -4 7
OMIT 5 -9 7
OMIT 0 6 5
OMIT -1 4 6
OMIT 4 -9 8
OMIT 2 4 6
OMIT 5 -11 7
OMIT 1 3 5
OMIT -1 7 5
OMIT -3 -3 11
OMIT -8 3 0
OMIT -1 5 6
OMIT -7 9 3
OMIT -8 4 0
OMIT 4 -10 8
OMIT -7 -2 9
OMIT -6 1 8
OMIT -7 9 4
OMIT 3 5 4
OMIT -5 12 3
OMIT -5 3 7
REM <olex2.extras>
REM <HklSrc "%.\\MXF-20181217.hkl">
REM </olex2.extras>

WGHT    0.174600
FVAR       0.41771
BA1   3    0.799917    0.710691    0.040582    11.00000    0.02504    0.01876 =
         0.00676    0.00329    0.00306    0.00888
BA2   3    0.698619    0.993928    0.274942    11.00000    0.02812    0.01492 =
         0.01423    0.00683    0.00816    0.01044
O1    4    0.667372    0.708649    0.211657    11.00000    0.03686    0.02452 =
         0.00965    0.00938    0.00879    0.00971
O2    4    0.827230    0.817590    0.374908    11.00000    0.05382    0.01639 =
         0.02344    0.00550   -0.00312    0.01111
O3    4    0.361145    0.227058    0.124621    11.00000    0.04285    0.03717 =
         0.01741    0.01227   -0.00873    0.01841
AFIX 147
H3    2    0.275922    0.267243    0.120382    11.00000    0.00809
AFIX   0
O4    4    0.411792    0.126273    0.247323    11.00000    0.03024    0.00932 =
         0.01569    0.00226   -0.00131    0.00579
O5    4    0.643087    0.134570    0.672199    11.00000    0.02526    0.01345 =
         0.01779    0.00162    0.00071   -0.00274
O6    4    0.807975    0.238649    0.836469    11.00000    0.03044    0.03714 =
         0.01535    0.01776    0.00216    0.01557
O7    4    1.103391    0.712564    0.937681    11.00000    0.03473    0.01965 =
         0.00911    0.00316    0.00631    0.00724
AFIX   3
H7    2    1.195661    0.795714    0.985571    11.00000   -1.50000
AFIX   0
O8    4    1.142936    0.818615    0.817652    11.00000    0.03473    0.01965 =
         0.00911    0.00316    0.00631    0.00724
AFIX   6
O12   4    0.772850    1.085116    0.487302    11.00000    0.03072    0.04018 =
         0.02092   -0.00541    0.00591    0.01496
H12A  2    0.883087    1.062657    0.503844    11.00000   -1.50000
H12B  2    0.741036    1.114579    0.541442    11.00000   -1.50000
AFIX   0
O13   4    0.517192    0.884058    0.055421    11.00000    0.03487    0.04043 =
         0.02623    0.00385    0.00757    0.00677
C1    1    0.734486    0.713675    0.306689    11.00000    0.03185    0.01888 =
         0.01239    0.00153    0.00522    0.01523
C2    1    0.694682    0.587918    0.337557    11.00000    0.01920    0.01910 =
         0.01191    0.00917    0.00751    0.00856
C3    1    0.590660    0.471756    0.264270    11.00000    0.02587    0.03197 =
         0.01132    0.01003    0.00455    0.01583
AFIX  43
H3A   2    0.546781    0.470377    0.195235    11.00000   -1.20000
AFIX   0
C4    1    0.551304    0.356311    0.293770    11.00000    0.02443    0.02003 =
         0.01094    0.01143    0.00700    0.01063
C5    1    0.619214    0.362168    0.397171    11.00000    0.01841    0.01150 =
         0.00983    0.00521    0.00074    0.00023
AFIX  43
H5    2    0.596918    0.285645    0.417161    11.00000   -1.20000
AFIX   0
C6    1    0.719259    0.477896    0.472064    11.00000    0.01014    0.02343 =
         0.00678    0.00650    0.00217    0.00848
C7    1    0.753547    0.588942    0.440696    11.00000    0.02087    0.01759 =
         0.00831    0.00840    0.00326    0.00622
AFIX  43
H7A   2    0.818265    0.667600    0.489899    11.00000   -1.20000
AFIX   0
C8    1    0.433767    0.230187    0.216879    11.00000    0.02887    0.01347 =
         0.00852    0.00379    0.00347    0.00458
C9    1    0.788372    0.479718    0.582092    11.00000    0.01840    0.02362 =
         0.00300    0.00488   -0.00010    0.00855
C10   1    0.741934    0.365729    0.613216    11.00000    0.00921    0.01829 =
         0.01500    0.00392    0.00015    0.00140
AFIX  43
H10   2    0.671316    0.288585    0.562779    11.00000   -1.20000
AFIX   0
C11   1    0.794188    0.360976    0.713385    11.00000    0.02277    0.01279 =
         0.00833    0.00003    0.00167    0.00332
C12   1    0.913078    0.476209    0.788423    11.00000    0.02277    0.01279 =
         0.00833    0.00003    0.00167    0.00332
AFIX  43
H12   2    0.957455    0.474763    0.856758    11.00000   -1.20000
AFIX   0
C13   1    0.965540    0.592418    0.762250    11.00000    0.01593    0.01821 =
         0.01369    0.00767    0.00011    0.00933
C14   1    0.899366    0.593081    0.660746    11.00000    0.01697    0.01488 =
         0.01866    0.01069    0.00759    0.00810
AFIX  43
H14   2    0.929363    0.671544    0.643735    11.00000   -1.20000
AFIX   0
C15   1    1.076311    0.716882    0.843319    11.00000    0.01889    0.02065 =
         0.01177    0.00488    0.00796    0.01453
C16   1    0.747523    0.235764    0.742868    11.00000    0.02252    0.02210 =
         0.00740    0.00370    0.00368    0.00980
O9    4    0.988184    0.968364    0.131429    11.00000    0.03408    0.02193 =
         0.04353    0.00161    0.00658    0.00925
AFIX   3
H9A   2    0.943004    1.032714    0.137949    11.00000   -1.50000
H9B   2    1.123104    1.001134    0.153559    11.00000   -1.50000
AFIX   0
O10   4    0.666578    0.432335   -0.020456    11.00000    0.03236    0.01854 =
         0.01965    0.00007    0.00012    0.00631
AFIX   3
H10A  2    0.804228    0.432585    0.001494    11.00000   -1.50000
H10B  2    0.640868    0.409545   -0.085536    11.00000   -1.50000
AFIX   0
O11   4    1.132382    1.103724    0.382884    11.00000    0.03080    0.02696 =
         0.03369    0.01183    0.00447    0.00919
AFIX   3
H11A  2    1.072012    1.117144    0.327154    11.00000   -1.50000
H11B  2    1.221542    1.174164    0.422304    11.00000   -1.50000
AFIX   0
HKLF 4


REM  mxf-20181217_a.res in P-1
REM wR2 = 0.2120, GooF = S = 1.043, Restrained GooF = 1.042 for all data
REM R1 = 0.0747 for 3190 Fo > 4sig(Fo) and 0.0776 for all 3510 data
REM 273 parameters refined using 12 restraints

END

WGHT      0.1747      0.0000

REM Highest difference peak  4.794,  deepest hole -2.682,  1-sigma level  0.406
Q1    1   0.7522  0.6786 -0.0404  11.00000  0.05    4.79
Q2    1   0.8507  0.7460  0.1208  11.00000  0.05    4.58
Q3    1   0.7560  1.0325  0.3640  11.00000  0.05    4.53
Q4    1   0.6530  0.9636  0.1957  11.00000  0.05    4.14
Q5    1   0.8600  0.6919  0.1806  11.00000  0.05    2.23
;
_shelx_res_checksum                25048
_shelx_hkl_file
;
   0   0  -1 1022.06   36.72
   0   0  -2 1503.62   54.42
   0   0  -2 1381.87   48.68
   0   0  -3 3985.62   81.70
   0   0  -3 3998.58   86.09
   0   0  -4 4425.72   76.87
   0   0   4 4581.52   84.59
   0   0   4 3770.80   58.61
   0   0  -4 4055.18   84.12
   0   0  -4 3987.49   78.82
   0   0  -5   64.07   10.34
   0   0   5   71.54   10.52
   0   0   5   55.92    6.95
   0   0  -5   66.76    9.35
   0   0   6  274.95   14.98
   0   0   6  301.88   21.26
   0   0  -6  321.48   20.37
   0   0  -6  302.12   22.26
   0   0  -7  337.51   21.11
   0   0  -7  335.53   23.79
   0   0   7  331.35   22.22
   0   0   8    3.93    2.68
   0   0  -8    3.52    2.28
   0   0  -8    5.14    3.26
   0   0   9 2885.89   69.93
   0   0  -9 2921.59   76.19
   0   0  -9 3049.63   68.58
   0   0 -10  685.80   36.67
   0   0  10  705.81   34.99
   0   0 -11   62.34   10.92
   0   0  11   70.29   10.67
   0   0 -12  938.95   42.16
   0   0  12  990.86   39.75
   0   0  13 1362.19   43.86
   0   0 -13 1298.49   47.19
   0   0 -14   65.66    9.74
   0   0 -14   79.59   11.72
   0   0 -15    1.45    1.25
   0   0 -15    1.46    0.90
   0   1 -16   67.96    7.39
   0   1 -15  561.55   27.16
   0   1 -15  611.44   27.25
   0   1 -14  346.99   24.94
   0   1 -14  334.24   22.58
   0   1 -13   57.40   11.36
   0   1 -13   48.48    9.19
   0   1 -12   51.60   10.03
   0   1 -11  348.87   26.29
   0   1 -10  167.43   19.65
   0  -1  10  141.38   15.08
   0   1 -10  166.56   16.52
   0   1  -9 2791.59   79.40
   0   1  -9 2571.08   60.38
   0  -1   8  119.07   13.10
   0   1  -8  143.14   13.88
   0  -1   7  276.66   19.51
   0   1  -7  333.80   20.18
   0   1  -7  323.24   24.61
   0  -1   7  289.02   17.59
   0  -1   6 2398.23   57.58
   0   1  -6 3266.51   63.71
   0  -1   6 2998.77   57.54
   0   1  -6 2568.86   68.02
   0   1  -5 7431.63   96.96
   0  -1   5 6619.28   88.97
   0  -1   4 1033.32   36.20
   0   1  -4 1198.14   40.45
   0  -1   3  775.53   32.62
   0   1  -3  753.42   32.27
   0   1  -2 2341.01   26.96
   0   1  -2 2236.21   41.82
   0   1  -1  446.31    8.28
   0   1  -1  452.96    7.73
   0  -1   0  332.84    5.43
   0   1   0  280.96    5.26
   0   1   0  291.12    6.66
   0   1   0  307.02    8.46
   0   1   0  291.66    3.99
   0   1   0  293.86    4.74
   0  -1   0  260.43    6.31
   0   1   1   57.76    2.70
   0  -1  -1   51.41    1.79
   0  -1  -1   44.42    1.94
   0  -1  -1   53.88    3.36
   0  -1  -1   46.61    3.16
   0  -1  -1   41.02    4.13
   0  -1  -2 1679.28   30.56
   0  -1  -2 1641.01   29.09
   0   1   3  521.19   12.68
   0  -1  -3  467.57   23.13
   0  -1  -3  481.39   22.66
   0   1   4 3417.17   42.13
   0  -1  -4 1588.99   48.03
   0   1   4 1848.52   29.05
   0  -1  -4 1712.11   49.10
   0  -1  -4 3880.93   72.92
   0  -1  -5   18.91    5.09
   0  -1  -5   16.43    4.85
   0   1   5   17.51    4.82
   0  -1  -5   32.50    6.90
   0   1   6  430.93   26.39
   0  -1  -6  491.64   26.87
   0  -1  -6  331.54   21.06
   0  -1  -6  331.74   21.79
   0   1   7 4163.94   84.99
   0  -1  -7 4404.58   80.73
   0   1   8 2393.94   66.19
   0  -1  -8 2517.01   63.42
   0  -1  -9   46.50    9.07
   0  -1  -9   74.17   11.40
   0   1   9   67.01   11.24
   0   1  10  368.92   25.99
   0  -1 -10  365.69   27.21
   0   1  11 1205.94   46.44
   0  -1 -11 1254.81   50.11
   0  -1 -12   33.29    7.83
   0   1  12   39.09    7.93
   0  -1 -13  208.34   18.64
   0   1  13  201.96   16.96
   0  -1 -14   47.51    8.89
   0   1  14   47.42    7.17
   0  -1 -14   47.36    7.97
   0  -1 -15    5.30    2.16
   0  -1 -15    3.08    2.01
   0   2 -16  142.18   10.91
   0   2 -16  142.49   11.47
   0   2 -15  436.51   24.32
   0   2 -15  451.08   24.21
   0   2 -14  708.13   36.06
   0   2 -14  684.83   33.40
   0   2 -13    8.61    4.27
   0   2 -13   12.78    4.95
   0   2 -12  513.92   35.83
   0   2 -12  444.06   29.71
   0   2 -11 3197.14   80.34
   0   2 -10 1082.44   52.04
   0   2 -10 1125.93   40.33
   0   2  -9   57.09   11.79
   0  -2   9   39.30    7.72
   0   2  -9   49.61    8.27
   0  -2   8 1687.03   46.59
   0   2  -8 1500.31   57.27
   0   2  -7 3400.38   64.04
   0   2  -7 1692.43   57.14
   0  -2   7 3069.61   64.90
   0  -2   7 1619.26   51.07
   0  -2   6   28.51    6.46
   0  -2   6   20.44    5.40
   0   2  -6   29.11    5.98
   0   2  -6    9.86    3.82
   0  -2   5  306.22   18.19
   0  -2   5  491.65   27.91
   0   2  -5  577.29   27.44
   0   2  -5  336.18   19.37
   0  -2   4  408.41   25.95
   0   2  -4  373.74   16.76
   0   2  -3   60.04    7.77
   0   2  -3   70.35    5.76
   0   2  -2 1798.49   23.17
   0   2  -2 1716.56   23.56
   0   2  -1 2651.47   23.73
   0   2  -1 2636.14   20.76
   0  -2   1 2703.14   38.04
   0   2   0   45.58    2.22
   0   2   0   47.40    3.89
   0  -2   0   40.77    3.29
   0  -2   0   46.56    3.57
   0   2   0   44.92    2.63
   0   2   0   44.07    2.96
   0   2   1 3619.67   27.93
   0  -2  -1 3772.43   37.28
   0   2   1 3668.90   31.94
   0   2   1 3719.71   41.87
   0  -2  -1 3857.65   24.68
   0  -2  -1 3656.10   34.71
   0  -2  -1 3473.58   15.68
   0  -2  -1 3672.95   34.39
   0  -2  -2 2988.33   36.98
   0  -2  -2 3001.72   38.20
   0  -2  -3  135.26   10.07
   0  -2  -3  132.17   10.30
   0   2   3  134.68   10.69
   0   2   4  446.67   23.58
   0  -2  -4  495.48   25.16
   0  -2  -4  517.37   24.46
   0   2   4  471.10   22.70
   0  -2  -5 1329.30   43.29
   0  -2  -5 1331.30   45.67
   0  -2  -6  875.98   36.33
   0   2   6  937.70   42.56
   0   2   6 1011.90   41.61
   0  -2  -6  958.17   37.15
   0  -2  -7  313.78   21.82
   0   2   7  414.57   27.87
   0  -2  -7  340.10   21.92
   0   2   7  415.18   29.42
   0   2   8  221.26   22.11
   0  -2  -8  249.40   21.37
   0   2   9  190.28   19.60
   0  -2  -9  178.58   19.71
   0  -2 -10  110.12   15.25
   0   2  10  106.76   14.46
   0   2  11  880.69   40.45
   0  -2 -11  961.99   44.58
   0  -2 -12  142.38   16.16
   0   2  12  142.58   15.38
   0   2  13    3.55    2.24
   0  -2 -13    7.14    3.18
   0  -2 -14  550.89   27.94
   0  -2 -14  613.57   26.39
   0   2  14  581.50   24.47
   0  -2 -15  742.81   26.40
   0   3 -16 1459.14   37.73
   0   3 -15  127.77   13.09
   0   3 -15  129.29   13.14
   0   3 -14    9.27    4.09
   0   3 -14    7.77    3.69
   0   3 -13  653.28   39.14
   0   3 -13  610.13   34.16
   0   3 -12 1133.64   54.32
   0   3 -12  949.74   43.93
   0   3 -11  132.61   19.55
   0   3 -11  111.58   15.20
   0  -3  10   31.19    7.18
   0   3 -10   44.12   11.01
   0  -3   9  371.68   25.58
   0   3  -9  458.51   34.18
   0  -3   8  133.71   14.98
   0   3  -8  158.57   13.71
   0  -3   8   60.30   10.67
   0   3  -8   79.17   13.05
   0  -3   7 1248.27   46.13
   0  -3   7 2432.87   65.38
   0   3  -7 1446.58   51.21
   0   3  -7 2911.45   58.27
   0  -3   6   78.79   12.27
   0  -3   6   64.24    9.04
   0   3  -6   62.26    9.17
   0  -3   5   36.38    8.62
   0  -3   5   29.22    5.08
   0   3  -5   29.52    5.37
   0   3  -4 2321.18   40.00
   0  -3   4 2303.42   39.17
   0   3  -3 1572.99   29.05
   0   3  -3 1580.94   32.29
   0   3  -2  253.80   10.38
   0   3  -2  252.08    5.56
   0   3  -2  247.43   10.49
   0   3  -2  280.82   11.32
   0   3  -2  254.09    9.00
   0  -3   2  241.18   15.60
   0  -3   1 1063.61   25.14
   0   3  -1 1013.19   15.07
   0   3  -1 1085.88   22.24
   0   3  -1 1012.57   17.71
   0   3  -1 1108.33   16.13
   0   3   0 2817.04   34.26
   0  -3   0 2869.24   35.02
   0   3   0 2916.01   38.09
   0   3   0 2724.13   29.11
   0   3   0 2693.96   25.23
   0   3   0 3007.96   21.22
   0  -3   0 2754.08   31.61
   0  -3  -1  238.54    7.75
   0  -3  -1  233.41   10.58
   0   3   1  228.64    8.16
   0   3   1  223.23    9.15
   0  -3  -1  220.52    4.52
   0   3   1  219.97   10.17
   0   3   2  118.65    8.71
   0   3   2  119.54    7.14
   0  -3  -2  110.73    9.66
   0  -3  -2  118.97    8.39
   0   3   2  122.69    8.16
   0  -3  -2  122.51    8.64
   0  -3  -3 1233.99   33.04
   0   3   3 1249.41   33.88
   0  -3  -3 1226.59   31.41
   0  -3  -4  482.42   23.68
   0  -3  -4  476.46   24.95
   0   3   4  451.45   24.15
   0  -3  -5 1247.29   44.68
   0  -3  -5 1176.00   44.98
   0  -3  -6  764.59   35.53
   0  -3  -6  738.42   37.12
   0  -3  -7   79.40   11.32
   0   3   7  101.75   15.39
   0  -3  -7   90.99   12.94
   0  -3  -8  151.72   16.44
   0  -3  -8  169.16   16.67
   0   3   9 3003.37   75.38
   0  -3  -9 3074.72   85.92
   0   3   9 3010.37   80.48
   0  -3 -10  254.59   24.36
   0   3  10  229.88   21.59
   0   3  10  235.38   20.03
   0   3  11    7.67    3.14
   0  -3 -11   19.64    6.28
   0   3  11   16.39    5.30
   0  -3 -12  440.05   27.46
   0   3  12  376.19   24.45
   0   3  13  708.32   29.89
   0  -3 -13  821.31   32.79
   0  -3 -14   12.94    4.09
   0   3  14   14.99    3.58
   0   4 -16   82.60    8.90
   0   4 -15  245.83   18.07
   0   4 -14  337.95   23.84
   0   4 -14  393.92   27.25
   0   4 -13  669.19   36.30
   0   4 -13  816.86   44.27
   0   4 -12  777.58   40.63
   0   4 -12  948.59   51.51
   0   4 -11    2.72    1.95
   0   4 -11    2.98    2.33
   0   4 -10  554.34   42.18
   0   4 -10  568.93   35.98
   0  -4  10  649.26   34.73
   0   4  -9 1318.16   59.82
   0  -4   9 1162.65   52.86
   0  -4   8  258.19   23.65
   0   4  -8  303.00   26.31
   0   4  -7   99.55   13.32
   0  -4   7  127.49   16.79
   0  -4   7   88.56   12.09
   0   4  -6 1154.26   39.27
   0  -4   6 1105.64   36.75
   0  -4   5 1940.84   67.75
   0  -4   5 2094.93   45.29
   0   4  -4  241.62   13.64
   0  -4   4  242.68   13.55
   0   4  -3   12.47    2.91
   0  -4   3   12.24    4.40
   0   4  -3   10.51    2.63
   0   4  -3   10.94    2.46
   0   4  -3   13.22    2.86
   0   4  -2 2593.94   31.37
   0   4  -2 2668.13   39.37
   0   4  -2 2528.08   39.48
   0  -4   2 2676.22   52.00
   0   4  -1  268.90    9.01
   0   4  -1  267.05   10.70
   0   4  -1  301.55    8.88
   0  -4   1  276.05   13.53
   0   4  -1  290.29   13.74
   0   4  -1  277.07   12.56
   0   4   0 2374.98   32.47
   0   4   0 2452.86   38.09
   0   4   0 2449.53   27.53
   0  -4   0 2345.10   32.91
   0  -4   0 2504.70   38.44
   0  -4  -1 2435.00   40.16
   0  -4  -1 2382.20   40.58
   0  -4  -1 2489.11   29.94
   0   4   1 2282.09   34.15
   0   4   1 2301.05   39.61
   0   4   1 2371.95   30.16
   0   4   2   35.48    4.79
   0   4   2   37.45    4.39
   0  -4  -2   37.48    5.63
   0  -4  -2   40.21    5.65
   0   4   2   34.72    5.31
   0   4   3   90.23    9.08
   0  -4  -3   63.69    9.34
   0   4   3   75.96    9.10
   0  -4  -3   78.86    9.26
   0  -4  -3   84.15    9.30
   0   4   3   79.74    7.68
   0   4   4 2288.07   58.77
   0  -4  -4 2475.23   60.70
   0   4   4 2254.67   48.39
   0   4   4 2433.22   55.61
   0  -4  -4 2534.64   59.26
   0  -4  -5   98.27   14.61
   0   4   5   78.10   10.41
   0   4   5   95.43   12.83
   0  -4  -5  113.60   15.06
   0  -4  -5  117.75   14.70
   0   4   5   85.34   12.79
   0   4   6   -1.14    2.84
   0  -4  -6    0.70    2.74
   0   4   6   -1.80    2.55
   0  -4  -6    1.59    2.55
   0  -4  -6   -0.73    0.89
   0  -4  -7 1032.68   45.47
   0  -4  -7  926.55   44.16
   0   4   7  947.70   49.90
   0   4   8  376.73   28.83
   0   4   8  349.91   29.14
   0   4   9  197.99   19.96
   0   4   9  195.45   20.96
   0   4  10    3.04    0.13
   0   4  10    2.60    1.39
   0   4  11  204.89   17.35
   0   4  11  200.16   18.99
   0   4  12  160.89   13.28
   0   4  12  177.17   15.97
   0   4  13  736.67   27.86
   0   5 -16    5.89    2.34
   0   5 -15  596.40   27.48
   0   5 -14  835.81   37.10
   0   5 -13    8.98    5.07
   0   5 -12   70.31   12.36
   0   5 -11 1862.56   62.16
   0   5 -11 2343.10   74.11
   0   5 -10  128.17   21.23
   0   5 -10  134.68   16.73
   0   5  -9   50.33   11.80
   0   5  -9   69.64   14.90
   0  -5   9   36.01    9.86
   0  -5   9   74.04   13.20
   0   5  -8   18.12    7.39
   0  -5   8   39.38    9.81
   0  -5   8   18.32    6.61
   0   5  -8   25.69    7.67
   0  -5   7 1044.86   42.72
   0   5  -7 1158.73   45.95
   0  -5   6  419.70   23.88
   0  -5   6  404.40   34.30
   0   5  -6  369.89   27.38
   0   5  -6  429.80   24.48
   0   5  -5 1850.04   51.46
   0  -5   5 1757.92   43.53
   0   5  -5 1711.27   43.60
   0   5  -4   23.68    4.66
   0  -5   4   15.87    6.29
   0   5  -4   29.05    5.38
   0   5  -3    5.50    2.06
   0   5  -3    3.89    1.53
   0   5  -3    8.06    2.55
   0   5  -3    6.57    2.03
   0  -5   3    6.52    3.72
   0   5  -2 5559.26   52.53
   0  -5   2 5542.14   76.38
   0   5  -2 5506.37   64.68
   0   5  -2 5609.43   47.16
   0   5  -1 2169.53   43.93
   0  -5   1 2160.75   40.40
   0  -5   1 2170.62   40.08
   0   5  -1 2141.96   29.21
   0   5  -1 2113.23   39.85
   0   5  -1 2031.53   34.06
   0  -5   0    6.13    1.75
   0   5   0    8.42    2.28
   0  -5   0    5.72    2.13
   0   5   0    4.64    1.79
   0   5   1  347.03   15.22
   0   5   1  348.16   17.92
   0  -5  -1  376.11   18.48
   0  -5  -1  379.16   18.30
   0  -5  -2 2967.52   55.63
   0  -5  -2 2866.44   55.63
   0   5   2 2808.56   56.60
   0   5   2 2919.17   48.99
   0  -5  -3   59.02    8.76
   0  -5  -3   56.41    8.99
   0   5   3   53.93    8.82
   0   5   3   61.48    8.15
   0  -5  -4   15.31    4.97
   0  -5  -4   19.56    5.83
   0   5   4   19.83    5.77
   0  -5  -5   74.27   13.70
   0  -5  -5   49.58   10.17
   0   5   5   47.02   10.25
   0   5   6    6.65    3.94
   0  -5  -6   11.40    5.97
   0  -5  -6   12.35    5.31
   0   5   7 1249.07   58.28
   0   5   7 1386.78   58.91
   0   5   8 1359.74   59.42
   0   5   8 1338.35   55.54
   0   5   9    9.73    4.77
   0   5   9   16.55    5.69
   0   5  10  299.37   22.64
   0   5  10  286.00   23.97
   0   5  11 1465.65   48.68
   0   5  11 1380.27   42.67
   0  -5 -12  287.61   15.46
   0   5  12  272.24   15.78
   0   5  12  296.14   18.77
   0   5  13    6.23    2.29
   0   6 -16  877.16   25.70
   0   6 -15   20.08    4.67
   0   6 -14   23.70    5.72
   0   6 -13  387.85   26.78
   0   6 -13  346.24   24.19
   0   6 -12  131.55   16.29
   0   6 -12  162.56   18.62
   0   6 -11 1387.94   73.96
   0   6 -11 1213.52   52.90
   0   6 -10 1454.68   61.29
   0   6 -10 1167.42   67.21
   0   6  -9  496.94   40.65
   0  -6   8  402.16   35.85
   0  -6   8  301.68   26.47
   0   6  -8  339.55   29.23
   0  -6   7 4713.79  127.06
   0   6  -7 4411.55   93.59
   0   6  -6  354.81   25.75
   0   6  -6  340.82   23.21
   0  -6   6  322.46   22.28
   0  -6   5    2.85    3.08
   0   6  -5    8.66    3.50
   0  -6   5    6.69    3.32
   0   6  -5    8.72    3.44
   0  -6   4 1721.60   61.02
   0   6  -4 1672.56   44.17
   0   6  -3 1297.89   35.91
   0  -6   3 1345.90   46.12
   0   6  -3 1247.23   37.27
   0  -6   2  322.80   17.34
   0   6  -2  332.10   19.18
   0  -6   2  344.51   19.79
   0   6  -2  319.72   17.58
   0  -6   1  119.65   10.57
   0  -6   1  111.80    9.83
   0   6  -1  112.70   10.51
   0  -6   0  372.39   19.46
   0   6   0  358.58   19.62
   0  -6  -1  148.00   13.04
   0  -6  -1  147.78   13.17
   0   6   1  148.73   13.48
   0  -6  -2 2361.12   58.25
   0   6   2 2290.06   58.06
   0  -6  -2 2414.66   56.74
   0  -6  -3  111.76   13.59
   0   6   3   94.71   13.38
   0  -6  -3   92.81   12.98
   0   6   4   16.80    6.33
   0  -6  -4   14.55    5.86
   0  -6  -4   13.60    5.53
   0   6   5  281.12   27.98
   0   6   5  546.78   39.44
   0   6   6 1257.05   60.89
   0   6   6 1770.00   71.06
   0   6   7  131.16   18.78
   0   6   7  106.61   17.59
   0   6   8   32.84    9.36
   0   6   8   37.85    9.85
   0   6   9  661.60   35.83
   0   6   9  713.36   40.06
   0   6  10  284.17   22.41
   0   6  10  247.82   19.28
   0   6  11   75.77    9.92
   0   6  11   72.72    8.75
   0  -6 -11   76.37    8.63
   0   6  12   20.14    4.10
   0   7 -15   52.98    7.01
   0   7 -14   12.84    4.11
   0   7 -14    9.51    3.30
   0   7 -13  813.32   37.32
   0   7 -13  726.53   35.28
   0   7 -12  443.18   30.81
   0   7 -12  566.92   34.67
   0   7 -11   89.92   18.93
   0   7 -11  121.88   17.13
   0   7 -11   97.07   15.01
   0   7 -10  733.76   53.77
   0   7 -10  731.17   43.93
   0   7  -9 1509.04   71.68
   0   7  -8  382.71   32.69
   0   7  -7  582.34   36.04
   0  -7   7  466.94   43.49
   0  -7   7  553.57   34.05
   0   7  -6  221.21   20.38
   0  -7   6  200.62   18.82
   0  -7   5  296.31   29.73
   0   7  -5  295.68   21.81
   0  -7   5  267.35   20.15
   0   7  -4 1072.28   39.55
   0  -7   4 1294.99   54.06
   0   7  -3 1637.49   44.84
   0  -7   3 1589.70   43.52
   0   7  -3 1551.33   46.82
   0  -7   2    4.03    2.21
   0  -7   2    2.30    2.05
   0   7  -2    0.80    0.33
   0   7  -1  300.39   19.34
   0  -7   1  303.34   19.03
   0   7   0 3000.54   64.17
   0  -7   0 2994.37   63.61
   0  -7   0 3066.10   63.43
   0   7   1 1562.24   49.88
   0  -7  -1 1514.39   48.05
   0  -7  -1 1570.21   48.17
   0  -7  -2   26.37    7.09
   0   7   2   23.48    6.30
   0  -7  -2   26.13    6.74
   0   7   3 1083.72   50.86
   0   7   3  716.18   43.73
   0   7   4  874.76   48.87
   0   7   4  352.88   32.75
   0   7   5   10.38    6.06
   0   7   5    3.56    2.18
   0   7   6   27.64    9.52
   0   7   6   52.28   13.01
   0   7   7   21.26    8.14
   0   7   7   15.36    7.57
   0   7   8   17.09    6.34
   0   7   8   14.32    6.18
   0   7   9  313.84   22.71
   0   7   9  300.36   23.73
   0   7  10  341.19   21.57
   0  -7 -10  310.51   18.03
   0   7  10  309.08   19.19
   0   7  11    1.81    1.05
   0  -7 -11    2.26    1.12
   0   8 -14  625.93   26.36
   0   8 -14  670.24   26.95
   0   8 -13    4.29    3.41
   0   8 -13    4.46    2.87
   0   8 -12   13.80    5.14
   0   8 -12   17.20    5.80
   0   8 -12   16.81    7.19
   0   8 -11   61.47   12.09
   0   8 -11   40.45    9.88
   0   8 -11   44.38   12.66
   0   8 -10    6.09    4.36
   0   8 -10    9.46    4.14
   0   8  -9 1493.71   71.82
   0   8  -8   94.88   16.57
   0   8  -7   99.01   15.56
   0   8  -6 1118.39   48.08
   0   8  -5 2558.04   68.75
   0  -8   5 2474.67   85.89
   0   8  -4   71.67   11.58
   0  -8   4   71.13   12.77
   0   8  -4   82.31   12.05
   0  -8   4   73.17   10.46
   0  -8   3   24.55    6.02
   0   8  -3   21.94    5.58
   0   8  -2 1579.84   48.92
   0  -8   2 1602.98   47.98
   0   8  -1 1034.34   40.71
   0   8  -1 1104.25   44.44
   0   8   0  529.68   32.01
   0   8   0  438.00   40.68
   0   8   1    0.63    3.05
   0   8   1    7.67    3.99
   0   8   1    5.59    4.39
   0   8   2  790.39   45.44
   0   8   2  963.43   49.85
   0   8   3  106.34   17.88
   0   8   4  245.40   28.00
   0   8   5    4.64    3.62
   0   8   5    0.05    2.28
   0   8   6   31.34    9.77
   0   8   6   54.41   12.59
   0   8   7  943.41   48.27
   0   8   7 1034.87   48.97
   0   8   8  644.87   34.97
   0   8   8  630.27   33.60
   0  -8  -9    5.75    2.52
   0   8   9    3.04    1.80
   0   8  10   99.72    9.06
   0   8  10   93.37    8.49
   0  -8 -10   90.48    7.82
   0   9 -14  412.77   19.15
   0   9 -13    9.55    3.52
   0   9 -12   24.68    8.50
   0   9 -12   22.80    6.27
   0   9 -11 1131.22   51.17
   0   9 -11  957.71   57.86
   0   9 -10  581.86   45.38
   0   9  -9    0.99    4.58
   0   9  -8  600.87   41.70
   0   9  -7 1679.86   65.51
   0   9  -6   16.25    6.69
   0   9  -5   89.96   13.97
   0   9  -5   88.50   13.85
   0   9  -4  391.25   30.46
   0   9  -4  394.79   28.19
   0   9  -3  189.64   19.42
   0   9  -3  218.16   24.00
   0   9  -2 1014.65   44.97
   0   9  -2 1072.63   57.19
   0   9  -1  598.52   47.20
   0   9  -1  649.63   36.80
   0   9  -1  667.46   56.18
   0   9   0    5.78    4.73
   0   9   0   19.88   14.36
   0   9   0   11.98    5.71
   0   9   1  107.34   16.23
   0   9   1  104.87   16.53
   0   9   2 1265.49   59.71
   0   9   2 1043.92   54.47
   0   9   3  125.10   19.78
   0   9   3  187.73   24.25
   0   9   4   -2.67    4.58
   0   9   4   -0.89    2.55
   0   9   5  233.50   27.05
   0   9   5  454.06   35.81
   0   9   6  596.50   37.38
   0  -9  -6  724.43   37.81
   0   9   7   31.06    7.35
   0   9   7   41.93    9.19
   0  -9  -7   40.45    7.88
   0   9   8   89.55   10.43
   0   9   8  102.60   11.53
   0  -9  -8   93.89    9.75
   0  10 -13  945.55   31.54
   0  10 -12  530.69   28.36
   0  10 -11   90.33   15.88
   0  10 -11  112.30   15.20
   0  10 -10   11.38    5.26
   0  10 -10   10.98    4.01
   0  10  -9  407.59   35.15
   0  10  -8   32.62   10.06
   0  10  -7  238.30   24.92
   0  10  -6  155.98   19.21
   0  10  -5    3.27    2.88
   0  10  -5    0.61    1.10
   0  10  -4  830.69   47.08
   0  10  -4  808.45   41.94
   0  10  -3 1152.17   59.59
   0  10  -3 1033.79   47.67
   0  10  -2    0.05    2.44
   0  10  -2    2.72    3.57
   0  10  -1   32.51   11.90
   0  10  -1   39.74   10.17
   0  10   0 1409.73   60.01
   0  10   0  999.35   68.53
   0  10   1  170.80   21.95
   0  10   1  154.76   19.35
   0  10   2   28.89    8.85
   0  10   2   40.98   11.48
   0  10   2   30.17   12.21
   0  10   3    9.45    4.42
   0 -10  -3   11.34    5.06
   0  10   4   77.59   14.75
   0  10   4  104.61   16.31
   0  10   5   76.03   12.82
   0 -10  -5  109.84   13.81
   0  10   5   69.28   12.55
   0  10   6  546.26   29.41
   0 -10  -6  605.14   27.87
   0  10   6  537.98   29.95
   0  10   7    0.51    0.44
   0  10   7   -0.66    1.32
   0  11 -12  551.67   25.20
   0  11 -11    5.76    3.12
   0  11 -11    6.67    2.29
   0  11 -10    3.79    2.54
   0  11 -10    8.72    2.83
   0  11  -9 1247.77   61.27
   0  11  -9 1372.47   60.61
   0  11  -8  344.51   30.10
   0 -11   7   15.18    6.05
   0  11  -7   18.30    7.76
   0  11  -6  461.68   33.39
   0  11  -5  824.03   44.70
   0  11  -5  838.91   44.24
   0  11  -4    1.11    2.34
   0  11  -4    2.79    2.18
   0  11  -3  113.79   16.23
   0  11  -3  116.54   19.71
   0  11  -2  214.63   29.01
   0  11  -2  194.42   21.55
   0  11  -1   81.31   19.30
   0  11  -1   81.57   14.22
   0  11   0  253.92   34.99
   0  11   0  523.58   36.34
   0  11   1  146.08   25.71
   0  11   1  145.40   19.29
   0  11   2    0.93    0.94
   0  11   2    1.95    2.90
   0  11   3  349.89   30.06
   0  11   3   81.47   13.70
   0  11   4  486.22   29.82
   0  11   4  928.24   38.86
   0  11   5   77.79    9.97
   0  12 -10  146.18   17.05
   0  12 -10  269.72   21.82
   0  12  -9  164.99   21.16
   0  12  -9  113.86   16.09
   0  12  -8   38.02   12.42
   0  12  -8   39.21    9.61
   0  12  -7  713.22   65.55
   0  12  -7  461.12   33.32
   0  12  -6    0.29    9.76
   0 -12   6   10.82    5.10
   0  12  -6   10.78    6.07
   0  12  -5  745.52   41.55
   0  12  -5  694.51   40.03
   0  12  -4   33.06    9.12
   0  12  -4   29.90    9.04
   0  12  -3   -1.17    0.51
   0  12  -3   -1.01    2.63
   0  12  -2  631.04   48.42
   0  12  -2  718.83   41.05
   0  12  -1  510.62   45.07
   0  12  -1  714.91   40.95
   0  12   0    9.69    5.70
   0  12   0   10.08    4.75
   0  12   1   58.37   11.05
   0  12   1  141.11   21.02
   0  12   2  224.39   20.17
   0  12   2  738.49   40.59
   0  13  -7 1162.83   53.75
   0  13  -6  145.58   19.01
   0  13  -5   16.87    6.89
   0  13  -4  797.82   44.72
   0  13  -3  315.79   27.88
   0  13  -3  289.89   28.58
   0  13  -2   47.33   10.62
   0  13  -2   24.84    8.42
  -1  13   0   67.90   11.99
  -1  13   0  123.46   21.65
  -1  13  -1    2.46    3.06
  -1  13  -1    1.93    2.88
  -1  13  -2  328.88   36.53
  -1  13  -2  362.17   28.74
  -1  13  -3  223.16   28.13
  -1  13  -3  218.90   22.65
  -1  13  -4  100.85   17.35
  -1  13  -4  119.79   16.60
  -1  13  -5  229.88   23.26
  -1  13  -5  211.41   22.80
  -1  13  -6  124.40   17.13
  -1  13  -7    3.91    3.10
  -1  12   4   95.43   11.78
  -1  12   3  220.05   20.53
  -1  12   3  781.18   40.60
  -1  12   2   26.47    9.75
  -1  12   2    6.45    2.58
  -1  12   1  470.37   44.72
  -1  12   1  325.28   27.60
  -1  12   0    6.56    3.92
  -1  12   0    0.73    4.59
  -1  12  -1   53.89   10.98
  -1  12  -1   41.84   13.39
  -1  12  -2  477.16   33.03
  -1  12  -2  448.48   43.54
  -1  12  -3  776.02   41.85
  -1  12  -3  837.11   55.52
  -1  12  -4   11.01    4.76
  -1  12  -4   16.61    7.31
  -1  12  -5   10.53    5.25
  -1  12  -5   16.31    6.60
  -1  12  -6 1286.94   54.81
  -1  12  -6 1188.91   53.10
  -1  12  -7  642.03   39.37
  -1  12  -7 1124.95   75.70
  -1  12  -8   35.59   11.31
  -1  12  -8   25.07    7.47
  -1  12  -9   61.19   12.35
  -1  12  -9  102.97   15.83
  -1  12 -10  784.08   35.92
  -1  12 -10  558.91   32.87
  -1  11   6   85.15   10.71
  -1  11   5   24.11    6.72
  -1  11   5   29.15    6.80
  -1  11   4    1.26    1.19
  -1  11   4   -0.14    2.10
  -1  11   4    4.91    2.12
  -1  11   3  978.43   57.38
  -1  11   3  435.73   33.83
  -1  11   2  189.24   28.63
  -1  11   2  143.51   19.61
  -1  11   1   10.43    6.85
  -1  11   1   25.66    8.52
  -1  11   0  359.50   42.52
  -1  11   0  569.51   37.66
  -1  11  -1 2283.50   73.52
  -1  11  -1 2113.25   98.70
  -1  11  -2   71.30   12.49
  -1  11  -2   88.24   18.96
  -1  11  -3    8.72    5.96
  -1  11  -3    8.07    3.79
  -1  11  -4  767.55   41.30
  -1  11  -4  797.13   49.72
  -1  11  -5  434.37   34.35
  -1  11  -5  412.38   30.58
  -1  11  -6   80.06   14.23
  -1  11  -6  109.04   28.58
  -1  11  -6   85.68   14.70
  -1  11  -7   95.04   15.69
  -1  11  -7   96.87   22.26
  -1  11  -8  227.48   30.16
  -1  11  -8  226.36   24.66
  -1  11  -9  109.04   17.88
  -1  11  -9   85.78   15.05
  -1  11 -10  650.84   40.96
  -1  11 -10 1144.17   48.94
  -1  11 -11  117.98   15.53
  -1  11 -11  119.56   13.48
  -1  11 -12   40.49    6.54
  -1  10   8  478.49   21.48
   1 -10  -8  493.12   19.86
  -1  10   8  503.93   23.28
  -1  10   7  100.32   12.17
  -1  10   7   86.34   12.15
   1 -10  -7  103.44   11.20
  -1  10   6   32.36    7.93
  -1  10   6   30.71    8.54
  -1  10   5  582.27   37.78
  -1  10   5  321.98   30.42
  -1  10   4  550.86   40.80
  -1  10   4  289.01   28.05
  -1  10   3    3.68    4.38
  -1  10   3   -1.42    5.02
  -1  10   3    1.49    1.72
  -1  10   3    1.27    2.92
  -1  10   2   12.88    8.39
  -1  10   2   19.51    7.68
  -1  10   2    8.33    4.93
  -1  10   1  847.96   63.71
  -1  10   1  810.98   65.94
  -1  10   0   60.26   12.44
  -1  10   0   50.53   16.51
  -1  10   0   51.17   16.43
  -1  10  -1  423.37   30.84
  -1  10  -1  418.85   41.57
  -1  10  -1  410.09   41.94
  -1  10  -2  193.92   28.16
  -1  10  -2  167.40   18.85
  -1  10  -2  173.94   25.22
  -1  10  -3  195.20   25.02
  -1  10  -3  200.34   20.49
  -1  10  -4  960.01   44.93
  -1  10  -4  975.10   52.42
  -1  10  -5 1253.28   57.03
  -1  10  -5 1253.79   52.72
  -1  10  -6    6.97    4.15
  -1  10  -6    8.36    3.84
  -1  10  -7  249.39   25.68
  -1  10  -8 1834.08   73.22
  -1  10  -8 1379.96   72.50
  -1  10  -9  254.41   27.77
  -1  10  -9  255.27   28.31
  -1  10 -10   16.53    5.62
  -1  10 -10   23.92    7.45
  -1  10 -11  203.80   19.44
  -1  10 -11  178.76   21.81
  -1  10 -12  619.81   29.47
  -1  10 -13   34.67    5.72
   1  -9  -9  209.30   14.01
  -1   9   9  203.29   14.92
  -1   9   9  215.23   16.60
  -1   9   8   13.41    6.14
  -1   9   8    9.72    4.17
  -1   9   7  337.02   30.01
  -1   9   7  390.65   28.69
  -1   9   6  609.38   39.78
  -1   9   5   32.20    9.83
  -1   9   5   82.90   15.28
  -1   9   4   83.25   16.25
  -1   9   4  124.85   21.34
  -1   9   3   51.46   11.93
  -1   9   3   72.74   14.53
  -1   9   3   65.50   17.57
  -1   9   3   62.13   15.92
  -1   9   2   74.51   13.38
  -1   9   2   20.12    7.72
  -1   9   2   74.53   14.03
  -1   9   2   21.26   10.02
  -1   9   1  160.04   27.45
  -1   9   1  166.83   26.70
  -1   9   0 1360.18   73.60
  -1   9   0 1526.33   74.40
  -1   9   0 1520.01   56.48
  -1   9  -1  241.96   21.68
  -1   9  -1  229.68   22.63
  -1   9  -1  248.31   29.33
  -1   9  -1  256.51   28.56
  -1   9  -2  920.19   44.13
  -1   9  -2  934.03   41.76
  -1   9  -2  951.65   53.83
  -1   9  -2 1040.74   54.63
  -1   9  -3 2334.14   78.51
  -1   9  -3 2236.63   67.89
  -1   9  -3 2424.82   80.13
  -1   9  -3 2239.42   64.85
  -1   9  -4    9.64    5.22
  -1   9  -4    5.68    3.78
  -1   9  -5   12.53    5.46
  -1   9  -5   11.63    4.72
  -1   9  -6 1263.51   53.67
  -1   9  -6 1155.99   51.65
  -1   9  -7  397.25   32.42
  -1   9  -8  386.91   34.68
  -1   9  -9    3.64    1.94
  -1   9  -9    5.74    4.38
  -1   9 -10   94.67   15.54
  -1   9 -10   82.97   16.74
  -1   9 -11  177.64   23.85
  -1   9 -11  188.38   19.86
  -1   9 -12 1036.17   41.31
  -1   9 -13   43.76    7.23
  -1   9 -14    5.42    2.09
  -1   8  10   89.58   10.02
  -1   8  10   92.60   10.22
  -1   8   9    2.87    2.23
  -1   8   9    1.08    1.46
  -1   8   8  109.53   15.09
  -1   8   8  112.54   15.36
  -1   8   7  245.75   24.85
  -1   8   7  296.95   27.58
  -1   8   6  851.13   49.69
  -1   8   5    5.31    4.04
  -1   8   5    1.68    2.69
  -1   8   4  106.74   19.95
  -1   8   4   30.73    9.09
  -1   8   3 1392.37   60.36
  -1   8   3 1339.47   74.26
  -1   8   2  457.21   39.33
  -1   8   2  340.82   36.98
  -1   8   1  127.05   15.67
  -1   8   1  113.32   14.17
   1  -8  -1  118.37   13.44
   1  -8  -1  112.24   13.72
  -1   8   1   80.05   16.93
   1  -8   0  390.79   24.28
  -1   8   0  417.32   24.46
   1  -8   0  433.48   24.42
   1  -8   1  778.85   32.02
  -1   8  -1  752.64   31.61
  -1   8  -2    9.47    3.70
   1  -8   2   16.18    4.45
   1  -8   3  786.18   32.75
   1  -8   3  686.78   31.59
  -1   8  -3  775.38   35.54
   1  -8   4  364.84   24.15
  -1   8  -4  398.34   26.49
   1  -8   4  426.44   35.57
   1  -8   5  250.35   21.36
  -1   8  -5  266.11   22.80
   1  -8   5  211.95   28.81
  -1   8  -6 1382.25   54.23
  -1   8  -7  685.50   41.74
  -1   8  -7  659.43   40.68
  -1   8  -8    8.16    5.90
  -1   8  -9  210.97   24.50
  -1   8  -9  299.33   32.53
  -1   8 -10  971.74   49.77
  -1   8 -10  794.42   55.09
  -1   8 -11  180.45   19.76
  -1   8 -11  200.29   26.73
  -1   8 -12   10.96    4.64
  -1   8 -13  417.95   24.30
  -1   8 -14  404.50   20.13
  -1   7  11  239.38   15.88
  -1   7  11  241.73   16.66
  -1   7  10    1.10    0.79
  -1   7  10    1.45    1.92
  -1   7   9  419.21   29.11
  -1   7   9  408.91   28.03
  -1   7   8 1498.38   59.09
  -1   7   8 1455.88   59.49
  -1   7   7  106.05   17.04
  -1   7   7  124.94   18.21
  -1   7   6   -2.03    3.89
  -1   7   6    0.87    0.98
  -1   7   5  628.44   43.12
   1  -7  -4  661.88   37.07
  -1   7   4  687.28   40.06
   1  -7  -3  290.15   23.49
   1  -7  -3  336.12   23.49
  -1   7   3  306.06   23.87
  -1   7   2   17.46    5.11
  -1   7   2   14.46    4.80
   1  -7  -2   13.31    4.65
   1  -7  -2   17.29    4.97
   1  -7  -1  515.38   24.98
  -1   7   1  470.70   24.25
   1  -7  -1  486.19   25.29
  -1   7   1  502.64   25.09
  -1   7   0   55.90    8.01
   1  -7   0   55.81    7.77
  -1   7   0   54.31    7.76
   1  -7   0   58.50    8.49
  -1   7  -1 2524.91   51.29
   1  -7   1 2662.98   52.69
  -1   7  -1 2543.55   52.11
   1  -7   2  565.70   24.62
  -1   7  -2  560.74   23.89
  -1   7  -2  530.27   26.01
   1  -7   3   53.51   11.16
  -1   7  -3   34.42    6.87
   1  -7   4  845.93   51.65
  -1   7  -4  929.26   36.25
   1  -7   4  845.61   33.28
  -1   7  -5 1838.88   54.03
  -1   7  -5 1864.90   50.81
  -1   7  -6    2.59    2.75
   1  -7   6    1.24    0.74
  -1   7  -6    0.48    1.52
   1  -7   6    0.89    0.84
  -1   7  -7   66.14   12.35
  -1   7  -7   61.81   12.36
   1  -7   7   85.51   18.02
   1  -7   7   56.44   11.75
  -1   7  -8 2240.94   81.62
  -1   7  -8 2121.69   80.64
  -1   7  -9   24.92    8.76
  -1   7  -9   30.69    9.48
  -1   7  -9   16.34    6.55
  -1   7 -10  164.62   24.61
  -1   7 -10  226.88   29.23
  -1   7 -11   17.22    5.90
  -1   7 -11    0.17    2.95
  -1   7 -11    0.43    2.61
  -1   7 -11   12.70    5.08
  -1   7 -12  132.07   15.07
  -1   7 -12  143.21   20.47
  -1   7 -12  110.87   14.54
  -1   7 -13  341.38   22.65
  -1   7 -13  398.95   23.63
  -1   7 -14  658.66   26.72
  -1   7 -14  646.95   26.90
  -1   6  12   15.12    3.78
  -1   6  12   16.35    4.22
  -1   6  11  107.58   12.63
  -1   6  11  114.63   12.36
  -1   6  10 1044.83   44.53
  -1   6  10  976.98   40.95
  -1   6   9   96.77   14.24
  -1   6   9  100.06   14.98
  -1   6   8  286.30   26.11
  -1   6   8  268.62   26.09
  -1   6   7  137.41   18.80
  -1   6   7  128.23   18.34
  -1   6   6  149.42   19.64
  -1   6   6  222.51   24.57
  -1   6   5  766.76   42.40
  -1   6   5  766.65   41.68
   1  -6  -5  714.37   42.55
   1  -6  -5  747.20   39.98
  -1   6   4 1061.39   44.34
  -1   6   4 1063.75   43.52
   1  -6  -4 1017.33   44.52
   1  -6  -4 1062.79   42.01
  -1   6   3   63.45    9.41
   1  -6  -3   67.19   10.33
  -1   6   3   70.96   10.10
   1  -6  -3   66.38    9.21
  -1   6   2   38.90    6.73
  -1   6   2   35.85    6.35
   1  -6  -2   41.56    6.66
   1  -6  -2   34.59    6.49
   1  -6  -1 2547.70   51.09
   1  -6  -1 2707.86   50.21
  -1   6   1 2614.54   50.58
  -1   6   1 2615.16   49.70
  -1   6   0  982.41   29.55
  -1   6   0  953.55   28.17
   1  -6   0 1011.98   29.58
   1  -6   1  135.34   10.59
  -1   6  -1  126.33   11.25
  -1   6  -1  128.77   10.09
  -1   6  -1  118.97   10.12
   1  -6   1  134.79   12.21
   1  -6   2  198.03   18.25
  -1   6  -2  186.55   12.28
  -1   6  -2  184.44   11.03
  -1   6  -2  184.44   12.65
  -1   6  -2  184.43   13.58
  -1   6  -3 3982.95   63.88
  -1   6  -3 4066.48   56.92
   1  -6   4   50.23    7.66
   1  -6   4   33.26   10.95
  -1   6  -4   51.41    7.60
  -1   6  -4   50.79    7.26
  -1   6  -5  439.36   24.48
   1  -6   5  463.40   41.99
   1  -6   5  392.96   23.18
  -1   6  -5  463.93   26.09
   1  -6   6   67.59   10.75
  -1   6  -6   80.57   12.81
  -1   6  -6   94.22   12.64
   1  -6   6   96.20   18.73
   1  -6   7   80.82   13.61
  -1   6  -7   88.94   15.57
  -1   6  -7  113.93   15.62
   1  -6   8  839.94   46.83
  -1   6  -8  686.74   47.20
  -1   6  -8 1514.70   64.32
   1  -6   8 1924.56   73.76
  -1   6  -9 1313.20   55.89
  -1   6  -9 1201.08   63.79
  -1   6  -9 1094.02   62.40
  -1   6 -10   70.70   12.44
  -1   6 -10   41.44   12.05
  -1   6 -10   65.60   14.37
  -1   6 -11  532.53   33.36
  -1   6 -11  481.40   42.06
  -1   6 -11  414.11   29.13
  -1   6 -12 1874.04   58.44
  -1   6 -12 2264.55   64.80
  -1   6 -13  183.42   16.61
  -1   6 -13  206.69   17.92
  -1   6 -14   25.31    5.56
  -1   6 -14   30.91    6.94
  -1   6 -15  479.10   20.85
  -1   6 -15  744.96   31.90
  -1   5  13    7.64    2.52
  -1   5  13    8.65    2.82
  -1   5  12  317.53   20.85
  -1   5  12  332.75   19.89
  -1   5  11   12.45    4.67
  -1   5  11   12.61    4.30
  -1   5  10 1085.11   44.52
  -1   5  10 1069.77   46.69
  -1   5   9  594.14   35.16
  -1   5   9  628.31   37.43
  -1   5   8   83.12   14.05
  -1   5   8   77.73   13.31
  -1   5   7  473.18   35.98
   1  -5  -7 1781.54   63.43
  -1   5   7  430.66   35.10
   1  -5  -7  686.35   35.92
  -1   5   7 1596.24   61.99
  -1   5   7 1536.16   61.13
   1  -5  -6  885.23   45.52
   1  -5  -6  983.02   44.94
  -1   5   6 1008.95   48.56
  -1   5   5   42.11    9.26
   1  -5  -5   56.63   10.68
  -1   5   5   36.84    8.12
   1  -5  -5   44.73    9.83
   1  -5  -5   41.46    8.36
  -1   5   4    7.00    3.06
   1  -5  -4    5.02    1.92
   1  -5  -4    5.23    3.01
   1  -5  -4    7.43    3.69
   1  -5  -3 2520.18   49.11
  -1   5   3 2524.26   53.49
   1  -5  -3 2420.36   52.81
  -1   5   3 2542.50   52.40
   1  -5  -2 1372.73   33.21
  -1   5   2 1323.20   34.47
   1  -5  -2 1298.49   34.05
  -1   5   2 1331.04   33.59
   1  -5  -1  441.27   18.22
   1  -5  -1  450.21   17.77
  -1   5   1  435.70   17.45
  -1   5   1  439.24   18.25
  -1   5   0    2.39    1.13
   1  -5   0    2.09    1.31
  -1   5   0    4.08    1.79
  -1   5   0    2.93    1.35
   1  -5   0    1.12    0.74
  -1   5  -1  342.61   13.34
  -1   5  -1  340.02   15.99
  -1   5  -1  340.71   15.34
   1  -5   1  318.53   20.49
  -1   5  -1  352.01   14.41
  -1   5  -2 3765.88   53.32
  -1   5  -2 3896.27   49.00
  -1   5  -2 3808.68   47.82
  -1   5  -2 3731.97   51.68
   1  -5   2 3637.30   88.02
   1  -5   3 1942.09   38.46
  -1   5  -3 2047.42   39.74
  -1   5  -3 1913.33   38.91
  -1   5  -4  250.26   15.25
   1  -5   4  300.41   32.79
   1  -5   4  230.93   14.81
  -1   5  -4  284.13   17.91
  -1   5  -5   99.33   10.79
  -1   5  -5  110.54   13.27
   1  -5   5   91.30   10.68
  -1   5  -6 1752.61   60.88
   1  -5   6 1803.28   55.50
  -1   5  -7 1262.38   57.94
  -1   5  -7 2691.60   74.75
   1  -5   7 3456.19   93.17
   1  -5   7 1666.12   59.76
   1  -5   8   -0.47    2.30
  -1   5  -8   -0.90    2.88
  -1   5  -8   -0.20    1.36
   1  -5   8    2.84    3.51
  -1   5  -9   69.26   14.81
  -1   5  -9   63.05   11.27
   1  -5   9   81.71   13.00
   1  -5   9   52.91   10.82
  -1   5 -10 1217.49   50.01
  -1   5 -10 1220.53   66.42
  -1   5 -11  141.08   16.48
  -1   5 -11  166.29   18.50
  -1   5 -11  161.20   23.37
  -1   5 -12  351.40   24.57
  -1   5 -12  388.31   27.24
  -1   5 -13   19.80    7.42
  -1   5 -13   10.77    4.22
  -1   5 -14   28.90    6.26
  -1   5 -14   42.74    8.85
  -1   5 -15  471.17   23.44
  -1   5 -15  414.34   20.58
  -1   4  14   38.00    5.72
  -1   4  13    8.78    3.14
  -1   4  13   10.93    3.29
  -1   4  12  807.33   32.86
  -1   4  12  804.57   35.60
  -1   4  11  999.40   40.07
  -1   4  11  990.52   42.59
  -1   4  10   42.24    9.27
  -1   4  10   44.97    9.18
  -1   4   9  648.16   36.97
  -1   4   9  617.47   34.90
  -1   4   8 2601.36   73.29
   1  -4  -8 2809.19   74.48
  -1   4   8 1601.51   67.69
  -1   4   8 1784.64   67.77
  -1   4   8 2687.00   77.27
  -1   4   7    6.02    3.40
   1  -4  -7    2.31    1.12
   1  -4  -7    7.37    4.03
  -1   4   7    0.37    2.04
  -1   4   6   92.61   13.73
  -1   4   6  111.31   15.51
   1  -4  -6   78.89   12.70
   1  -4  -6   97.84   12.65
  -1   4   5  199.19   17.97
   1  -4  -5  192.64   16.55
   1  -4  -5  180.19   17.86
  -1   4   5  231.73   19.91
   1  -4  -4  243.31   17.57
  -1   4   4  268.33   18.38
  -1   4   4  254.26   17.30
   1  -4  -4  248.60   15.99
   1  -4  -3 2108.86   43.51
  -1   4   3 2162.33   42.51
  -1   4   3 2211.03   45.34
   1  -4  -3 2114.30   39.27
  -1   4   2 1886.37   33.91
  -1   4   2 1857.88   36.12
   1  -4  -2 1893.10   35.56
   1  -4  -2 1966.01   33.93
   1  -4  -1   94.41    7.76
  -1   4   1  114.91    7.57
   1  -4  -1  109.41    7.54
   1  -4  -1   98.56    6.63
  -1   4   1  105.53    7.85
  -1   4   0 1941.08   28.18
  -1   4   0 1887.13   32.93
  -1   4   0 1836.89   31.82
  -1   4   0 1880.84   28.95
  -1   4  -1 9789.90   65.99
  -1   4  -1 9770.57   73.46
  -1   4  -1 9999.00   65.16
  -1   4  -1 9736.02   73.28
  -1   4  -2  286.65   12.53
  -1   4  -2  292.69   11.62
  -1   4  -2  302.36   12.95
  -1   4  -2  287.93   12.90
   1  -4   3   22.84    3.97
   1  -4   3   36.40   12.63
  -1   4  -3   25.40    4.00
  -1   4  -3   32.50    5.26
   1  -4   4 3319.40   54.50
  -1   4  -4 3396.91   52.56
   1  -4   5 2857.97   59.50
  -1   4  -5 2974.03   68.52
  -1   4  -6    1.84    1.59
   1  -4   6    3.34    2.18
  -1   4  -6   12.64    4.47
   1  -4   6   14.12    5.36
   1  -4   7   72.54   12.07
  -1   4  -7   54.22   11.52
   1  -4   8   28.09    7.21
  -1   4  -8   27.11    8.65
  -1   4  -8   19.32    6.53
   1  -4   8   19.94    6.15
  -1   4  -9   52.96   12.29
  -1   4  -9   33.90    9.49
   1  -4   9   31.32    7.47
   1  -4   9   36.51    7.92
  -1   4 -10 2092.56   83.31
  -1   4 -10 2325.57   70.33
  -1   4 -11  336.40   24.14
  -1   4 -11  387.43   28.34
  -1   4 -12   21.91    8.22
  -1   4 -12   17.33    5.68
  -1   4 -13 1057.74   50.41
  -1   4 -13  928.62   40.04
  -1   4 -14 1413.83   44.98
  -1   4 -14 1587.96   54.14
  -1   4 -15   66.66    8.42
  -1   4 -15   72.78    9.55
  -1   3  15   19.95    3.67
   1  -3 -15   15.09    3.76
  -1   3  14  538.39   24.20
  -1   3  13  470.72   23.05
  -1   3  13  433.02   24.57
  -1   3  12   36.23    7.94
  -1   3  12   33.89    6.69
  -1   3  11    5.22    3.16
  -1   3  11    3.59    3.18
  -1   3  10  288.05   23.79
  -1   3  10  270.14   22.05
  -1   3   9   61.98   11.24
  -1   3   9   47.71    9.92
  -1   3   9   52.83    9.62
   1  -3  -8 1801.53   53.61
  -1   3   8 1564.58   60.33
   1  -3  -7  131.40   14.62
   1  -3  -7  152.59   14.14
  -1   3   7  167.72   19.03
   1  -3  -6   84.50   10.68
   1  -3  -6   67.67   10.41
  -1   3   6   60.17   10.55
   1  -3  -5 1691.22   51.93
   1  -3  -5 1701.72   47.08
  -1   3   5 1759.71   51.62
  -1   3   4 4499.11   69.57
   1  -3  -4 4340.20   72.85
   1  -3  -4 4524.12   65.09
   1  -3  -3  126.76    9.98
  -1   3   3  132.59    9.66
  -1   3   3  139.12   10.48
   1  -3  -3  128.71    8.73
  -1   3   2  276.77   11.15
   1  -3  -2  274.44   10.68
   1  -3  -2  263.42   11.73
  -1   3   2  269.21   12.28
  -1   3   1 3300.90   38.43
  -1   3   1 3427.47   33.51
  -1   3   0  650.36   14.96
  -1   3   0  651.29   15.87
  -1   3   0  662.52   13.87
  -1   3  -1 3181.73   34.10
  -1   3  -1 3172.17   30.15
  -1   3  -1 3124.77   34.54
   1  -3   2  199.66    9.53
  -1   3  -2  194.16    8.94
   1  -3   3  403.01   17.03
  -1   3  -3  404.84   15.00
  -1   3  -3  450.60   19.03
  -1   3  -4 1230.83   31.64
  -1   3  -4 1189.22   36.91
   1  -3   5 1245.32   44.00
  -1   3  -5 1232.00   32.81
  -1   3  -5 1287.19   45.18
  -1   3  -6   20.84    6.44
   1  -3   6   61.49   10.33
   1  -3   6   33.96    7.49
  -1   3  -6   20.31    5.07
  -1   3  -6   53.60    9.25
  -1   3  -7  222.64   18.11
  -1   3  -7  174.62   20.36
   1  -3   7  242.17   20.49
  -1   3  -7  148.11   17.49
   1  -3   7  251.85   19.96
   1  -3   8 1900.65   54.73
   1  -3   8 1979.70   53.86
  -1   3  -8 1799.22   65.39
  -1   3  -9 1323.83   58.57
  -1   3  -9 1446.26   62.01
  -1   3 -10   65.47   14.12
  -1   3 -10   65.73   11.66
  -1   3 -11  339.85   26.50
  -1   3 -11  386.49   33.74
  -1   3 -12 1978.59   72.58
  -1   3 -12 1735.55   57.90
  -1   3 -13   14.51    5.65
  -1   3 -13   14.68    5.00
  -1   3 -14  319.82   24.01
  -1   3 -14  282.51   20.58
  -1   3 -15   71.93    9.52
  -1   3 -15   63.17    8.45
  -1   2  15   51.86    6.63
   1  -2 -15   47.16    7.20
  -1   2  14  541.71   25.70
   1  -2 -13  759.62   33.70
  -1   2  13  683.42   32.16
   1  -2 -12  131.25   15.26
  -1   2  12  128.04   13.39
  -1   2  12  120.87   14.31
  -1   2  11   65.01   11.00
   1  -2 -11   80.50   12.22
  -1   2  11   63.71    9.97
  -1   2  10 4547.95   89.95
  -1   2  10 4553.89   87.27
  -1   2  10 4600.86   94.38
  -1   2   9 1069.15   44.32
   1  -2  -9  947.91   38.47
   1  -2  -8   93.15   12.02
  -1   2   8  109.28   13.87
   1  -2  -8  121.19   13.18
  -1   2   7 1300.24   47.13
   1  -2  -7 1314.92   42.39
  -1   2   6 2040.18   55.96
   1  -2  -6 2163.26   51.30
   1  -2  -6 1992.05   55.34
   1  -2  -5   74.05   10.70
   1  -2  -5   91.98   10.73
  -1   2   5   55.78    8.23
   1  -2  -4  700.96   31.03
   1  -2  -4  872.79   38.23
   1  -2  -4  710.59   27.64
  -1   2   4  835.18   26.98
   1  -2  -3  814.52   22.58
   1  -2  -3  812.52   27.01
  -1   2   2   66.80    2.90
   1  -2  -2   54.39    7.32
   1  -2  -2   63.91    5.46
  -1   2   2   65.91    4.98
   1  -2  -2   59.36    4.15
   1  -2  -2   61.60    2.72
  -1   2   1 2684.33   22.37
   1  -2  -1 2870.78   31.99
   1  -2  -1 2651.24   25.82
  -1   2   1 2728.21   22.10
  -1   2   1 2835.35   28.57
   1  -2  -1 2793.31   23.38
  -1   2   0  820.36   10.89
  -1   2   0  829.63   13.54
  -1   2   0  832.01   17.91
  -1   2   0  812.91   15.06
  -1   2  -1   20.17    2.16
   1  -2   1   19.32    2.53
  -1   2  -1   21.72    4.26
  -1   2  -2 2539.68   30.02
  -1   2  -2 2312.99   54.14
  -1   2  -3 4703.69   53.58
   1  -2   3 3709.05   71.42
  -1   2  -4  790.04   25.40
   1  -2   4  748.76   35.45
  -1   2  -4  791.06   30.75
  -1   2  -5   41.73    6.66
  -1   2  -5   54.56    9.53
   1  -2   6 5916.38   91.27
  -1   2  -6 4417.55   89.99
  -1   2  -6 4319.32   76.83
   1  -2   6 7003.47  102.03
  -1   2  -6 3190.38   81.34
  -1   2  -7  903.85   40.06
  -1   2  -7  827.95   43.71
   1  -2   7  867.59   36.30
  -1   2  -7  833.32   41.86
  -1   2  -8 1665.71   55.30
  -1   2  -8 1576.63   60.12
  -1   2  -8 1690.33   63.37
  -1   2  -9  150.11   17.06
   1  -2   9  128.82   14.38
  -1   2  -9  148.66   18.85
  -1   2  -9  156.53   19.39
  -1   2 -10  379.09   27.92
  -1   2 -11   52.30   11.79
  -1   2 -11   38.69    8.49
  -1   2 -12  684.90   41.33
  -1   2 -12  642.09   35.27
  -1   2 -13  392.19   29.01
  -1   2 -13  355.85   25.00
  -1   2 -14    5.10    2.68
  -1   2 -14    1.95    1.67
  -1   2 -15  654.45   28.10
  -1   2 -15  624.18   26.43
   1  -1 -15 1339.35   36.09
  -1   1  15 1249.77   34.76
   1  -1 -14   58.03    8.69
  -1   1  14   59.31    8.62
   1  -1 -13   68.91   10.41
  -1   1  13   77.76   10.86
  -1   1  12 2239.25   62.13
   1  -1 -12 2136.80   61.51
  -1   1  11  629.73   34.01
   1  -1 -11  588.20   33.06
  -1   1  10  525.63   31.73
  -1   1  10  451.86   28.35
   1  -1  -9  124.55   15.25
  -1   1   9  124.74   14.45
   1  -1  -9  109.88   12.35
   1  -1  -8  391.68   26.10
  -1   1   8  443.21   26.84
  -1   1   7   98.93   12.06
   1  -1  -7   79.95   10.33
   1  -1  -7   87.54   12.01
   1  -1  -6 1246.22   44.32
   1  -1  -6  947.71   37.45
  -1   1   5  193.15   16.68
   1  -1  -5   46.53    8.66
   1  -1  -5  161.46   16.05
  -1   1   5   78.38    6.28
   1  -1  -4  476.91   25.57
   1  -1  -4  227.76   16.34
  -1   1   4  288.18   11.03
   1  -1  -4  410.13   27.04
  -1   1   4  453.73   25.10
   1  -1  -3 3921.47   84.92
  -1   1   3 3899.86   36.15
   1  -1  -2 2994.35   30.99
   1  -1  -2 3006.33   20.91
   1  -1  -2 2755.94   46.30
   1  -1  -2 2948.23   27.98
  -1   1   2 2839.26   36.58
   1  -1  -2 2891.00   61.33
  -1   1   1   14.40    1.78
   1  -1  -1   14.80    1.36
   1  -1  -1   16.51    2.27
   1  -1  -1   14.81    1.83
   1  -1  -1   15.65    1.03
  -1   1   1   14.83    1.59
  -1   1   0  346.33    8.33
  -1   1   0  297.34    7.68
   1  -1   0  329.29    6.52
   1  -1   0  297.46    7.97
  -1   1   0  334.94    4.98
  -1   1  -1 3278.86   30.60
  -1   1  -1 3198.00   26.24
  -1   1  -2  881.13   21.07
  -1   1  -2  847.59   20.57
  -1   1  -3  284.35   14.95
  -1   1  -3  285.55   13.69
  -1   1  -3  206.34   14.00
  -1   1  -3  236.02   14.06
  -1   1  -4    7.06    2.74
  -1   1  -4    9.51    3.13
  -1   1  -4    7.45    2.82
  -1   1  -5  670.33   33.35
   1  -1   5  866.58   37.97
  -1   1  -6  566.75   31.53
  -1   1  -6  377.01   24.07
   1  -1   6  602.05   30.93
   1  -1   6  309.89   18.76
   1  -1   7 1060.21   40.85
  -1   1  -7 1066.13   45.24
  -1   1  -7 1131.91   46.37
  -1   1  -7 1083.81   48.54
  -1   1  -8  137.38   17.43
   1  -1   8  126.16   14.63
  -1   1  -8  126.50   15.57
  -1   1  -9  147.42   17.30
   1  -1   9  136.04   15.56
  -1   1  -9  154.53   18.67
  -1   1  -9  168.11   19.52
  -1   1 -10 2105.41   66.78
  -1   1 -11  734.48   39.29
  -1   1 -12   94.82   15.03
  -1   1 -12   93.95   13.68
  -1   1 -13  355.01   26.73
  -1   1 -13  337.05   24.24
  -1   1 -14  655.33   30.43
  -1   1 -14  675.80   32.55
  -1   1 -15    8.57    2.86
  -1   1 -15   11.11    3.41
   1   0 -16   70.38    7.29
  -1   0  15   91.32    9.45
   1   0 -15   95.84   10.59
   1   0 -15   84.55   10.19
   1   0 -14  244.55   20.66
  -1   0  14  270.07   18.82
   1   0 -14  283.82   20.46
  -1   0  13  294.23   21.33
   1   0 -13  298.38   22.68
   1   0 -12  521.40   31.03
  -1   0  12  573.24   31.51
  -1   0  11  773.69   37.79
   1   0 -11  708.49   36.58
  -1   0  10   57.85    9.49
   1   0 -10   61.34    9.43
   1   0 -10   61.43   11.54
   1   0  -9  469.05   25.07
  -1   0   9  501.10   27.20
  -1   0   8 2813.15   63.04
   1   0  -8 3185.74   79.74
   1   0  -7 2384.69   66.80
  -1   0   7 2176.54   54.82
   1   0  -6  111.72   13.88
  -1   0   6  102.80   11.96
  -1   0   6   75.83    8.61
   1   0  -5 1544.09   42.38
   1   0  -5 2319.42   61.16
  -1   0   5 2305.14   58.43
  -1   0   4 3805.51   67.34
  -1   0   4 4206.91   53.82
  -1   0   3   99.71    7.12
   1   0  -3   98.11    6.03
  -1   0   3  108.32    8.00
   1   0  -3  103.43    5.36
  -1   0   2  439.00    9.65
   1   0  -2  398.47    9.60
  -1   0   2  447.68   13.11
   1   0  -2  420.78   10.00
   1   0  -2  391.39   11.64
  -1   0   1  828.94   10.33
   1   0  -1  888.16   15.17
   1   0  -1  898.05   13.41
   1   0  -1  809.87    7.89
   1   0  -1  818.88    9.88
  -1   0   1  831.17    7.28
  -1   0   1  906.16   16.60
  -1   0   0    1.55    0.71
   1   0   0    2.26    0.56
   1   0   0    3.28    0.83
  -1   0   0    3.12    1.39
  -1   0   0    1.74    0.54
  -1   0   0    2.27    0.47
  -1   0   0    2.12    0.48
   1   0   1 3128.83   32.04
  -1   0  -1 3189.67   66.05
   1   0   1 3280.77   41.02
   1   0   1 3112.86   28.40
  -1   0  -1 3249.92   27.29
  -1   0  -1 3173.67   54.50
  -1   0  -2 1032.06   20.93
   1   0   2  827.70   24.97
  -1   0  -2 1121.93   43.58
  -1   0  -2  827.27   16.58
   1   0   2  871.06   24.80
  -1   0  -2  941.42   43.82
  -1   0  -3  390.78   25.68
   1   0   3  154.70   12.53
  -1   0  -3  241.75   14.06
  -1   0  -3  353.50   26.22
   1   0   3  130.98   12.30
  -1   0  -3  215.73   10.90
  -1   0  -3  246.74   14.01
  -1   0  -4  846.12   37.85
  -1   0  -4  318.80   20.24
   1   0   4  420.16   25.05
   1   0   4  596.39   26.23
  -1   0  -4  368.20   17.71
  -1   0  -4  931.85   38.71
   1   0   5 6802.28   89.03
  -1   0  -5 6618.89  103.26
  -1   0  -6  438.70   26.66
   1   0   6  460.53   28.42
  -1   0  -7  227.84   21.51
  -1   0  -7  265.44   23.08
  -1   0  -7  204.77   18.46
   1   0   7  231.66   20.56
   1   0   8 1333.08   50.71
  -1   0  -8 1292.73   48.62
  -1   0  -9  319.50   26.59
   1   0   9  304.12   24.49
  -1   0  -9  302.75   24.38
  -1   0 -10  574.08   35.99
   1   0  10  616.46   33.66
  -1   0 -11    7.57    3.40
   1   0  11    5.90    3.03
  -1   0 -12  178.44   18.53
  -1   0 -13  161.82   17.44
  -1   0 -13  171.66   16.82
  -1   0 -14  718.59   30.48
  -1   0 -14  656.52   30.65
  -1   0 -15  125.22   11.02
  -1   0 -15  129.66   10.87
   1   1 -16   95.06    9.36
   1   1 -15    9.12    3.54
   1   1 -14  628.25   32.95
   1   1 -14  620.81   31.43
   1   1 -13 1496.82   51.97
  -1  -1  13 1640.19   50.43
  -1  -1  12   82.93   11.82
   1   1 -12   66.38   11.30
  -1  -1  11  107.09   14.07
  -1  -1  11  104.01   13.57
   1   1 -11   97.55   13.69
   1   1 -10 2251.46   56.36
  -1  -1  10 2268.91   58.75
   1   1  -9   34.78    6.71
   1   1  -9   42.55    9.65
  -1  -1   9   28.10    6.31
  -1  -1   8  563.56   28.59
   1   1  -8  525.09   27.23
  -1  -1   7 1006.01   38.82
   1   1  -7 1158.05   46.41
   1   1  -6 1137.46   39.15
  -1  -1   6 1199.26   39.64
   1   1  -6 1104.07   40.68
   1   1  -5  754.19   25.05
  -1  -1   5  779.59   26.99
   1   1  -5  706.10   27.25
  -1  -1   4 2434.62   36.72
   1   1  -4 2346.32   33.64
   1   1  -4 2468.50   39.96
  -1  -1   3   35.97    3.57
   1   1  -3   37.29    4.03
  -1  -1   3   37.47    5.06
   1   1  -3   33.86    3.67
   1   1  -2   10.74    1.67
  -1  -1   2   14.88    2.80
   1   1  -2   13.22    1.90
   1   1  -1 5082.21   32.80
   1   1  -1 5095.30   34.84
  -1  -1   0 2128.70   26.72
   1   1   0 2133.32   23.07
  -1  -1   0 2091.43   23.23
  -1  -1  -1    6.74    1.01
  -1  -1  -1    4.74    1.36
  -1  -1  -1    7.92    1.42
   1   1   1    7.10    1.99
  -1  -1  -1    5.66    1.89
   1   1   1    8.77    1.73
  -1  -1  -2  418.52   17.05
  -1  -1  -2  399.83   18.66
   1   1   2  423.33   17.55
  -1  -1  -2  455.31   12.62
  -1  -1  -2  376.58   10.71
   1   1   2  416.38   15.36
   1   1   3 3715.07   58.68
  -1  -1  -3 4628.68   55.16
  -1  -1  -3 3722.12   67.66
   1   1   3 4195.19   62.90
  -1  -1  -3 4646.84   66.93
   1   1   3 4478.21   64.27
  -1  -1  -3 4419.25   44.04
  -1  -1  -3 3889.23   72.19
  -1  -1  -4  123.77   11.85
  -1  -1  -4  193.60   12.04
   1   1   4  152.59   14.35
   1   1   4  157.61   14.42
  -1  -1  -4  154.84   15.11
  -1  -1  -4  166.54   16.35
  -1  -1  -4  140.92   13.89
   1   1   4  218.55   15.14
  -1  -1  -5  108.60   13.98
  -1  -1  -5  316.00   21.88
   1   1   5  160.93   16.27
  -1  -1  -5  166.99   16.53
  -1  -1  -5  301.12   21.73
  -1  -1  -6   96.55   13.84
  -1  -1  -6  101.74   12.53
   1   1   6  101.06   13.60
   1   1   6   85.93   12.81
  -1  -1  -6  100.21   12.16
   1   1   7  118.59   15.26
  -1  -1  -7  116.78   15.92
   1   1   7  106.91   15.08
  -1  -1  -7   98.23   12.20
   1   1   8 1736.45   61.62
   1   1   8 1721.80   59.65
  -1  -1  -9  320.07   27.55
   1   1   9  295.59   24.75
   1   1  10   42.14    9.04
  -1  -1 -10   35.40    8.92
   1   1  11 1105.73   44.93
  -1  -1 -11 1129.83   49.48
   1   1  12 2045.87   56.53
  -1  -1 -12 2095.71   63.12
  -1  -1 -13  230.79   20.35
   1   1  13  258.81   17.58
  -1  -1 -13  255.61   19.93
  -1  -1 -14    1.51    1.75
  -1  -1 -14    1.35    2.31
   1   2 -16  472.39   22.20
   1   2 -15  939.06   36.39
   1   2 -14    4.65    2.37
   1   2 -13   16.55    5.96
   1   2 -12  424.73   29.79
  -1  -2  12  426.13   27.46
   1   2 -11   98.75   14.42
  -1  -2  11  104.64   13.86
   1   2 -10 1256.69   40.72
   1   2 -10 1361.49   58.79
   1   2  -9  754.27   42.14
   1   2  -9  763.20   31.90
   1   2  -8   11.49    4.76
  -1  -2   8   11.92    4.36
   1   2  -8   18.21    5.31
  -1  -2   7  741.67   33.36
   1   2  -7  734.23   34.97
  -1  -2   6 7306.86  109.30
   1   2  -6 6716.90   89.22
   1   2  -6 7955.66   98.14
  -1  -2   6 8479.15   94.25
   1   2  -5  118.30    9.37
  -1  -2   5  124.88    9.67
   1   2  -5  133.14   10.57
   1   2  -5  119.68    9.07
  -1  -2   5  103.53   12.17
  -1  -2   4  140.22    8.81
   1   2  -4  140.00    8.69
   1   2  -4  131.98    7.76
  -1  -2   4  120.07   11.74
   1   2  -4  148.14    9.22
   1   2  -3 2137.59   29.80
  -1  -2   3 2184.43   42.58
   1   2  -3 2065.57   29.26
  -1  -2   2  752.20   21.50
   1   2  -2  765.39   17.37
   1   2  -2  754.80   16.70
   1   2  -2  748.59   16.45
  -1  -2   1  592.26   17.00
   1   2  -1  593.96   15.07
   1   2  -1  599.92   14.85
  -1  -2   1  563.44   14.13
  -1  -2   0   77.89    5.68
  -1  -2   0   70.10    5.31
   1   2   0   70.35    2.55
   1   2   0   72.78    5.26
  -1  -2   0   74.09    4.79
   1   2   0   88.33    7.70
   1   2   0   69.16    5.28
   1   2   1  665.74   17.50
  -1  -2  -1  707.37   17.59
  -1  -2  -1  687.23   14.12
  -1  -2  -1  678.74   18.72
   1   2   1  655.30   17.58
  -1  -2  -2   72.93    7.38
  -1  -2  -2   75.09    6.90
  -1  -2  -2   66.30    4.56
   1   2   2   67.72    7.78
   1   2   2   72.98    6.65
   1   2   2   74.37    7.03
  -1  -2  -2   77.80    3.56
  -1  -2  -3 5341.78   78.39
  -1  -2  -3 5526.03   75.63
   1   2   3 5542.80   73.50
  -1  -2  -3 5247.03   47.11
  -1  -2  -4  265.48   20.31
  -1  -2  -4  259.33   19.64
   1   2   4  293.97   20.13
  -1  -2  -4  262.17   13.86
  -1  -2  -5   30.61    7.14
   1   2   5   29.85    7.20
  -1  -2  -5   38.29    8.08
  -1  -2  -6 1456.74   48.91
  -1  -2  -6 1334.63   46.93
  -1  -2  -7 2477.73   63.95
  -1  -2  -7 2430.97   62.43
   1   2   7 2614.61   78.06
   1   2   8  339.11   28.60
  -1  -2  -8  357.73   30.59
   1   2   8  374.87   29.33
  -1  -2  -8  271.21   21.33
   1   2   9  514.46   34.06
  -1  -2  -9  560.94   38.41
   1   2  10 1006.81   46.08
  -1  -2 -10 1067.60   51.18
  -1  -2 -11  849.77   43.01
   1   2  11  777.03   37.88
  -1  -2 -12  196.10   19.02
   1   2  12  183.82   16.66
  -1  -2 -13    6.06    3.29
   1   2  13    8.29    2.82
  -1  -2 -13    3.10    2.34
  -1  -2 -14   55.52    6.98
  -1  -2 -14   45.49    6.88
   1   3 -16   74.99    8.95
   1   3 -15  656.92   31.13
   1   3 -14    9.85    4.28
   1   3 -13    6.52    3.50
   1   3 -12 1552.50   59.84
  -1  -3  11 1917.23   62.47
   1   3 -11 1750.42   65.22
   1   3 -10   29.45    8.46
  -1  -3  10   29.06    7.70
  -1  -3   9   14.54    5.64
   1   3  -9   45.00    7.65
   1   3  -9   17.77    6.33
  -1  -3   9   44.43    9.53
   1   3  -8 1756.63   50.92
   1   3  -8 1628.56   57.55
  -1  -3   8 1672.19   56.64
  -1  -3   7  233.81   18.11
  -1  -3   7  250.08   22.95
   1   3  -7  240.21   19.45
  -1  -3   6  851.09   29.63
   1   3  -6  860.99   31.42
   1   3  -5 1638.41   35.89
   1   3  -5 1669.67   32.12
   1   3  -5 1728.65   37.94
   1   3  -4  117.92    8.47
  -1  -3   4  122.73   12.95
   1   3  -4  120.05    8.71
   1   3  -4  121.53    7.29
   1   3  -3 2025.74   31.74
   1   3  -3 2177.23   46.04
   1   3  -3 2151.49   35.47
   1   3  -3 2009.02   32.99
  -1  -3   3 2156.03   45.97
   1   3  -2 2435.79   35.97
  -1  -3   2 2399.58   41.81
   1   3  -2 2261.42   31.92
   1   3  -2 2545.63   50.38
   1   3  -2 2374.52   35.71
   1   3  -1    6.77    1.99
   1   3  -1    7.84    2.08
  -1  -3   1    7.43    2.18
   1   3  -1    6.37    0.73
   1   3  -1    9.76    2.04
  -1  -3   0  948.02   22.73
   1   3   0 1072.81   34.82
   1   3   0  949.24   21.56
  -1  -3   0 1037.27   19.53
   1   3   0  923.06   23.05
   1   3   0  910.06   13.33
  -1  -3   0  970.56   22.07
   1   3   1 6208.10   64.44
   1   3   1 6413.36   88.03
   1   3   1 6570.67   42.84
  -1  -3  -1 6827.94   47.74
  -1  -3  -1 6449.23   65.51
   1   3   1 6302.52   60.37
  -1  -3  -1 6637.61   64.39
  -1  -3  -1 6415.26   54.54
   1   3   2 2724.05   45.13
  -1  -3  -2 2697.59   30.32
  -1  -3  -2 2799.82   47.06
  -1  -3  -2 2707.94   48.07
   1   3   2 2665.01   47.56
   1   3   3   33.76    5.69
  -1  -3  -3   33.52    6.25
  -1  -3  -3   30.91    6.00
   1   3   3   37.39    6.68
   1   3   4 1152.14   39.24
  -1  -3  -4 1146.54   43.47
  -1  -3  -4 1133.98   43.27
   1   3   4 1136.97   42.04
   1   3   5  708.63   37.56
  -1  -3  -5  719.77   38.22
   1   3   5  683.86   34.20
  -1  -3  -5  700.44   36.68
  -1  -3  -6    2.34    1.11
   1   3   6    1.72    1.19
   1   3   6    1.81    1.01
   1   3   7  133.87   18.60
  -1  -3  -7  138.02   16.04
  -1  -3  -7  151.27   16.86
   1   3   7  136.70   17.50
   1   3   8  645.91   40.65
   1   3   8  640.43   37.09
  -1  -3  -8  661.21   43.94
   1   3   9    3.14    2.60
   1   3   9    5.68    3.71
  -1  -3  -9    1.90    2.56
  -1  -3 -10  548.24   37.26
   1   3  10  472.75   32.04
   1   3  11  756.43   36.82
  -1  -3 -11  869.08   42.84
   1   3  12   39.98    7.35
  -1  -3 -12   42.76    8.69
  -1  -3 -13  346.32   20.36
   1   3  13  356.14   18.36
  -1  -3 -13  382.00   19.86
   1   4 -16  289.76   17.81
   1   4 -15   16.26    5.23
   1   4 -14  839.16   40.36
   1   4 -13 1062.63   49.15
   1   4 -12   -0.62    2.97
   1   4 -11  157.84   20.22
   1   4 -10  185.78   24.38
  -1  -4  10  122.95   18.35
  -1  -4   9   10.50    5.09
  -1  -4   9   20.17    6.97
   1   4  -9    4.74    3.59
   1   4  -8 1458.72   54.60
  -1  -4   8 1493.49   53.72
  -1  -4   7  537.26   37.05
   1   4  -7  615.92   30.99
  -1  -4   7  604.17   30.00
   1   4  -6   37.14    6.76
  -1  -4   6   33.96    6.58
  -1  -4   6   35.00    9.12
   1   4  -5 2500.05   39.39
   1   4  -5 2517.07   46.36
   1   4  -5 2521.78   48.33
  -1  -4   4 8130.32  110.83
   1   4  -4 7854.32   58.75
   1   4  -4 7493.98   72.36
   1   4  -4 7310.11   75.38
   1   4  -3   11.20    2.99
  -1  -4   3   16.76    4.54
   1   4  -3    9.88    2.49
   1   4  -3    9.37    2.54
   1   4  -2  208.06   18.47
   1   4  -2  193.81   11.78
  -1  -4   2  208.98   13.70
   1   4  -2  197.47   10.33
  -1  -4   2  183.74   10.89
   1   4  -2  196.64   11.98
  -1  -4   1 3151.81   45.96
   1   4  -1 3193.34   42.13
  -1  -4   1 3317.76   39.51
  -1  -4   1 3246.52   48.07
   1   4  -1 3325.08   51.16
   1   4  -1 3176.61   47.96
   1   4   0  706.73   20.94
  -1  -4   0  720.05   21.04
   1   4   0  706.92   23.50
   1   4   0  711.03   37.29
  -1  -4   0  801.28   18.25
  -1  -4   0  719.80   23.14
  -1  -4  -1  333.56   17.10
  -1  -4  -1  348.13   17.25
   1   4   1  314.66   17.08
  -1  -4  -1  339.91   13.84
   1   4   1  343.06   15.69
  -1  -4  -2    4.48    2.76
  -1  -4  -2    4.22    2.55
   1   4   2    6.41    2.67
   1   4   2    4.87    2.47
   1   4   3  802.36   30.79
  -1  -4  -3  779.59   33.70
  -1  -4  -3  794.42   33.62
   1   4   3  750.98   32.98
  -1  -4  -4  218.78   20.63
   1   4   4  209.47   19.78
   1   4   4  202.96   17.77
  -1  -4  -4  215.01   20.35
   1   4   5  518.18   31.91
   1   4   5  492.05   33.91
  -1  -4  -5  525.50   35.13
  -1  -4  -5  513.89   34.90
  -1  -4  -6   16.54    6.09
  -1  -4  -6   15.99    5.52
   1   4   6    7.10    4.20
   1   4   6   11.87    4.91
   1   4   7   26.35    8.54
   1   4   7   13.24    6.01
  -1  -4  -7   16.85    7.34
   1   4   8 1275.80   58.72
  -1  -4  -8 1187.48   63.14
   1   4   8 1269.40   53.48
   1   4   9  927.71   47.59
  -1  -4  -9  997.91   54.52
   1   4   9  916.13   42.06
  -1  -4 -10    5.02    2.91
  -1  -4 -10    3.06    0.34
   1   4  10    3.91    3.19
   1   4  10    1.88    1.94
  -1  -4 -11   97.76   13.37
  -1  -4 -11   85.83    9.55
   1   4  11   94.53   12.37
   1   4  12  709.44   28.69
  -1  -4 -12  765.78   29.78
   1   5 -16   65.48    8.17
   1   5 -15  277.56   20.08
   1   5 -14  150.21   16.90
   1   5 -13  713.07   40.79
   1   5 -12    7.73    3.68
   1   5 -11  153.32   23.10
   1   5 -10  615.26   46.60
  -1  -5   9 1181.46   56.23
   1   5  -9 1085.84   53.96
  -1  -5   8   50.43   10.72
  -1  -5   8   55.66   13.37
   1   5  -8   60.74   11.40
   1   5  -7  634.95   32.75
  -1  -5   7  664.81   33.02
   1   5  -6 2208.20   54.55
  -1  -5   6 2291.79   55.88
   1   5  -5  515.14   22.75
   1   5  -5  563.47   25.00
  -1  -5   5  521.80   34.09
   1   5  -4   61.80    7.89
   1   5  -4   54.65    6.73
   1   5  -4   48.48    6.94
  -1  -5   4   56.58    9.92
  -1  -5   3   71.98    9.61
   1   5  -3   64.01    7.88
   1   5  -3   74.53    8.28
   1   5  -3   67.97    6.96
  -1  -5   3   69.48    7.64
  -1  -5   2  481.61   20.19
   1   5  -2  467.13   17.75
  -1  -5   2  506.97   22.89
   1   5  -2  484.48   21.79
   1   5  -2  462.17   20.48
  -1  -5   1 1229.06   32.34
  -1  -5   1 1239.64   32.93
   1   5  -1 1221.78   33.74
   1   5  -1 1201.49   28.72
   1   5   0  692.89   22.79
   1   5   0  662.34   26.30
  -1  -5   0  685.24   25.86
  -1  -5   0  683.30   22.33
   1   5   1   88.42   10.43
   1   5   1   89.44    8.97
  -1  -5  -1   86.54   10.04
  -1  -5  -1   89.69   10.11
   1   5   2  622.63   26.41
   1   5   2  599.84   30.01
  -1  -5  -2  606.79   28.70
  -1  -5  -2  587.40   28.33
  -1  -5  -3 2653.31   69.34
   1   5   3 2533.32   69.12
  -1  -5  -3 2606.43   68.84
   1   5   4  345.77   28.73
  -1  -5  -4  361.73   29.75
  -1  -5  -4  346.92   28.32
   1   5   5    6.63    2.75
   1   5   5   14.85    6.37
   1   5   6  430.29   36.57
  -1  -5  -6  287.17   31.90
   1   5   7 1051.33   56.54
  -1  -5  -7  937.83   58.28
   1   5   8   38.44   10.75
  -1  -5  -8   37.49   12.11
   1   5   8   27.36    8.28
   1   5   9   13.09    4.94
   1   5   9   16.41    6.40
  -1  -5  -9   12.61    6.24
   1   5  10  265.98   22.03
   1   5  10  260.91   19.13
  -1  -5 -10  239.18   17.48
  -1  -5 -10  313.83   24.53
   1   5  11    0.49    0.57
  -1  -5 -11    1.03    0.86
   1   6 -16  245.04   14.63
   1   6 -15 1349.32   42.35
   1   6 -14  246.05   21.15
   1   6 -13    3.55    3.71
   1   6 -12  903.50   44.96
   1   6 -12 1114.75   54.50
   1   6 -11  795.53   55.17
   1   6 -10  282.18   31.69
  -1  -6   9   38.46   10.29
   1   6  -9   39.12   10.57
  -1  -6   8 1206.51   53.85
   1   6  -8 1300.33   55.03
  -1  -6   8 1156.15   66.02
  -1  -6   7    1.28    1.55
  -1  -6   7    2.11    3.06
  -1  -6   6 1020.25   40.74
   1   6  -6 1107.83   41.81
   1   6  -5  721.06   31.56
   1   6  -5  667.95   28.79
  -1  -6   5  772.23   43.31
   1   6  -4   53.07    8.29
  -1  -6   4   49.04    9.65
   1   6  -4   46.38    7.39
  -1  -6   4   49.13    7.38
   1   6  -3  753.61   30.63
  -1  -6   3  748.35   28.44
   1   6  -3  761.43   29.46
  -1  -6   3  810.27   34.43
   1   6  -2 1171.87   36.46
  -1  -6   2 1126.10   34.72
  -1  -6   2 1215.50   37.70
  -1  -6   1    7.56    3.48
   1   6  -1    6.60    2.83
  -1  -6   0  139.51   13.17
  -1  -6   0  146.25   13.63
   1   6   0  140.26   13.69
  -1  -6  -1 3560.34   71.35
   1   6   1 3518.07   74.87
  -1  -6  -1 3567.62   71.21
  -1  -6  -2  572.07   31.64
   1   6   2  586.21   33.50
  -1  -6  -2  572.24   31.65
  -1  -6  -3   83.69   14.04
   1   6   3   81.27   14.05
  -1  -6  -3   80.99   13.36
   1   6   4   17.44    7.01
   1   6   4   45.29   11.79
   1   6   5   62.21   14.44
   1   6   5  154.08   22.10
   1   6   6  110.16   19.43
   1   6   6  148.41   21.04
   1   6   7  646.35   44.62
   1   6   7  695.51   42.55
   1   6   8    5.02    3.45
   1   6   8    1.05    2.47
   1   6   9   32.61    8.15
  -1  -6  -9   38.27    7.44
   1   6   9   36.67    7.69
  -1  -6 -10  623.06   24.88
   1   6  10  688.81   31.34
   1   6  10  606.41   25.85
   1   7 -15   40.35    6.60
   1   7 -14  192.04   17.50
   1   7 -13  532.56   31.18
   1   7 -13  611.60   35.42
   1   7 -12  254.50   25.18
   1   7 -12  268.34   30.65
   1   7 -11  388.46   38.37
   1   7 -10    5.97    1.76
   1   7  -9   34.98   10.92
  -1  -7   9   34.91   10.30
  -1  -7   8 2644.17   82.10
   1   7  -8 2897.03   86.85
   1   7  -7  598.26   35.97
   1   7  -6   12.58    5.01
  -1  -7   6    6.16    3.38
  -1  -7   6   17.84    8.00
  -1  -7   5  766.50   33.82
   1   7  -5  753.34   35.88
  -1  -7   5  860.26   47.46
   1   7  -4 2444.68   59.67
  -1  -7   4 2327.22   56.84
   1   7  -4 2312.90   60.82
  -1  -7   3   97.72   12.57
   1   7  -3   74.98   10.19
  -1  -7   3   84.19   10.59
  -1  -7   2  147.89   14.10
   1   7  -2  144.40   14.36
   1   7  -1  996.15   38.99
  -1  -7   1  989.54   37.81
  -1  -7   1  955.67   37.23
  -1  -7   0   25.89    6.71
  -1  -7   0   30.01    6.85
   1   7   0   22.51    6.26
   1   7   1 1900.35   61.97
   1   7   1 1726.37   63.07
   1   7   2  381.46   32.45
   1   7   3   11.18    6.31
   1   7   3   12.39    6.28
   1   7   4  203.70   25.73
   1   7   4   59.51   14.28
   1   7   5  368.14   35.81
   1   7   5  889.02   54.13
   1   7   6  103.22   17.50
   1   7   6   67.20   14.72
   1   7   7    0.90    2.54
   1   7   7    8.89    4.61
  -1  -7  -7    7.19    4.30
   1   7   8  559.86   34.05
  -1  -7  -8  525.55   28.38
   1   7   8  539.86   30.89
   1   7   9  454.76   24.07
  -1  -7  -9  407.18   20.88
   1   7   9  410.79   22.17
  -1  -7 -10   18.40    3.37
   1   8 -15   26.90    4.54
   1   8 -14  406.34   21.01
   1   8 -14  458.40   23.80
   1   8 -13  997.28   40.65
   1   8 -13 1219.92   45.66
   1   8 -12   13.52    6.29
   1   8 -12   10.62    4.56
   1   8 -12    8.65    4.07
   1   8 -11    6.46    2.47
   1   8 -10 1078.34   61.39
  -1  -8  10 1018.66   54.18
   1   8  -9  610.17   43.38
  -1  -8   9  574.03   40.54
   1   8  -8  157.80   20.51
  -1  -8   8  129.88   18.67
   1   8  -7   51.66   11.19
   1   8  -6 1101.48   47.64
   1   8  -5   79.85   12.34
   1   8  -4 1747.73   56.21
   1   8  -4 1859.20   61.40
   1   8  -3  110.03   14.04
  -1  -8   3   94.31   11.90
   1   8  -2   30.32    7.38
   1   8  -1  154.63   17.21
   1   8  -1  158.84   17.73
   1   8   0 2682.77   76.81
   1   8   0 2583.50   76.34
  -1  -8  -1  140.19   18.46
   1   8   1  156.78   19.37
   1   8   1  136.01   18.93
   1   8   2   42.80   11.00
   1   8   2   37.90   11.16
  -1  -8  -2   17.57    6.94
  -1  -8  -3  212.76   25.59
   1   8   3  359.77   34.79
   1   8   4   71.33   14.84
   1   8   4   43.05   11.82
  -1  -8  -5  166.00   21.03
   1   8   5  106.78   17.58
   1   8   6   50.06   11.36
  -1  -8  -6   91.49   13.85
   1   8   6   63.97   12.49
   1   8   7  106.88   14.06
  -1  -8  -7  118.32   13.56
   1   8   7  112.21   14.20
   1   8   8  260.70   17.48
  -1  -8  -8  241.65   16.07
   1   8   8  239.53   17.10
   1   9 -13   72.54    9.91
   1   9 -13   72.44   10.03
   1   9 -12  221.48   24.33
   1   9 -12  170.56   17.75
   1   9 -12  234.72   20.48
   1   9 -11   86.62   16.00
   1   9 -11   96.65   15.13
   1   9 -10  417.49   36.58
  -1  -9  10  385.34   31.38
  -1  -9   9  399.85   32.18
   1   9  -9  427.22   36.18
   1   9  -8   69.73   13.84
  -1  -9   8   53.12   12.05
   1   9  -7  368.04   30.37
   1   9  -6 1995.04   67.37
   1   9  -5  302.61   25.43
   1   9  -4   27.68    7.52
   1   9  -4   18.80    7.22
   1   9  -3 1432.07   54.61
   1   9  -3 1523.52   65.26
  -1  -9   3 1361.00   46.01
   1   9  -2  901.03   44.09
  -1  -9   2  858.27   38.02
   1   9  -1  311.41   26.83
   1   9   0   22.41    7.67
   1   9   0   14.22    5.86
   1   9   1   88.87   15.51
  -1  -9  -1   81.37   13.82
   1   9   1   89.18   16.15
   1   9   2    2.34    2.47
   1   9   2    4.93    2.92
  -1  -9  -2    0.39    1.32
  -1  -9  -3  164.27   20.83
   1   9   3  142.43   20.98
   1   9   4   75.28   14.12
   1   9   4   99.07   16.78
   1   9   5   17.89    6.57
   1   9   5   17.24    6.27
   1   9   5   39.89    8.95
  -1  -9  -5   24.12    6.95
   1   9   6  401.96   21.85
   1   9   6  367.98   24.38
  -1  -9  -6  428.75   24.84
   1   9   6  404.96   26.52
  -1  -9  -7  733.67   26.68
   1   9   7  755.54   27.31
   1  10 -13   82.01    9.03
   1  10 -12  359.42   23.18
   1  10 -11  483.98   31.12
   1  10 -11  465.83   34.65
   1  10 -10    5.53    0.83
  -1 -10   9   44.14   10.03
   1  10  -9   50.04   11.82
   1  10  -8 1211.63   56.74
  -1 -10   8 1054.67   50.10
   1  10  -7  513.30   35.92
   1  10  -6  268.28   25.36
   1  10  -5   30.36    8.66
   1  10  -5   29.17    7.91
   1  10  -4  296.35   25.72
   1  10  -4  343.08   29.91
   1  10  -3  418.71   30.96
   1  10  -3  417.35   35.94
   1  10  -2  245.56   29.90
   1  10  -2  244.58   24.02
  -1 -10   2  238.14   19.98
  -1 -10   1   27.05    7.28
   1  10  -1   31.01    8.42
   1  10  -1   24.55   10.50
  -1 -10   0    2.79    1.35
   1  10   0   -1.05    3.33
   1  10   1 1147.83   54.80
   1  10   1 1026.65   65.84
  -1 -10  -2  281.44   23.77
   1  10   2  387.46   31.38
   1  10   3    4.99    2.44
  -1 -10  -3   14.18    4.76
   1  10   4  115.52   14.69
  -1 -10  -4   91.55   11.96
   1  10   5  629.34   26.47
  -1 -10  -5  639.30   26.92
   1  10   5  581.56   27.21
   1  11 -11   26.70    7.21
   1  11 -11   22.09    5.82
   1  11 -10  124.29   17.00
   1  11 -10  129.29   16.85
   1  11  -9   41.73    9.85
  -1 -11   9   32.50    7.98
   1  11  -8  549.68   37.70
  -1 -11   8  428.67   30.67
   1  11  -7  231.42   23.92
  -1 -11   7  185.78   20.57
   1  11  -6   63.55   12.28
   1  11  -5  232.98   23.53
   1  11  -5  241.68   22.36
   1  11  -4 1255.00   56.25
   1  11  -4 1279.92   54.79
   1  11  -3   92.53   14.89
   1  11  -3   86.07   16.13
   1  11  -2    1.19    1.77
   1  11  -2    1.91    4.06
   1  11  -1  890.59   46.44
   1  11  -1  656.98   49.99
   1  11   0  380.65   30.28
  -1 -11   0  378.89   24.97
   1  11   1   47.07   10.21
  -1 -11  -1   53.68    9.13
   1  11   2   11.03    4.67
  -1 -11  -2    4.49    2.25
   1  11   3  560.41   29.94
   1  11   3  371.57   22.79
   1  12  -9  737.89   43.11
   1  12  -9  469.27   32.57
   1  12  -8   -0.30    2.14
   1  12  -8   -1.29    5.44
  -1 -12   8    0.74    1.75
   1  12  -7  127.21   17.94
  -1 -12   7   82.43   13.14
  -1 -12   6  984.27   47.29
   1  12  -6 1319.11   57.85
   1  12  -5  255.13   25.42
   1  12  -4  114.35   16.89
   1  12  -4  120.70   16.42
   1  12  -3   91.73   15.33
   1  12  -3   85.98   15.06
   1  12  -2  347.76   28.73
   1  12  -2  290.07   29.04
   1  12  -1   75.74   13.19
   1  12  -1   63.65   13.71
   1  12   0  188.28   21.77
  -2  13   1    0.69    0.30
  -2  13   1  -12.19    6.81
  -2  13   0  701.25   60.12
  -2  13   0  502.30   32.56
  -2  13  -1  213.02   34.00
  -2  13  -1  228.55   22.29
  -2  13  -2    8.02    7.50
  -2  13  -2   10.24    5.10
  -2  13  -3  333.78   27.45
  -2  13  -3  349.51   38.76
  -2  13  -4 1012.47   48.36
  -2  13  -4 1070.91   61.61
  -2  13  -5   17.06    6.92
  -2  13  -5    7.10    3.87
  -2  13  -6    5.05    4.84
  -2  13  -6    1.94    2.67
  -2  12   4    1.23    1.60
  -2  12   3   10.75    4.30
  -2  12   3   69.44   14.01
  -2  12   2  660.89   38.52
  -2  12   2 1466.70   78.25
  -2  12   1  468.93   32.51
  -2  12   1  504.60   51.69
  -2  12   0    3.75    2.82
  -2  12   0   15.44    5.45
  -2  12  -1   60.87   18.17
  -2  12  -1   60.93   11.57
  -2  12  -2  676.91   38.24
  -2  12  -2  751.40   60.18
  -2  12  -3   13.27    5.29
  -2  12  -3   12.75    7.24
  -2  12  -4  391.33   37.35
  -2  12  -4  376.35   28.84
  -2  12  -5  192.09   21.06
  -2  12  -5  204.56   25.15
  -2  12  -6   34.53    8.93
  -2  12  -6   32.44    9.21
  -2  12  -7  569.19   37.33
  -2  12  -7  606.33   37.84
  -2  12  -8  369.86   31.71
  -2  12  -8  178.73   20.42
  -2  12  -9   -1.78    2.54
  -2  12  -9    3.60    2.26
  -2  12 -10   98.55   11.42
  -2  11   6   74.95   11.19
  -2  11   5   -1.16    3.20
  -2  11   4  823.17   46.41
  -2  11   4  828.33   48.16
  -2  11   3  648.92   51.45
  -2  11   3  535.42   44.24
  -2  11   2  165.85   29.78
  -2  11   2  161.33   20.12
  -2  11   1    9.29    5.35
  -2  11   1   34.12    9.43
  -2  11   1   14.20    9.49
  -2  11   0  453.72   32.29
  -2  11   0  325.26   43.07
  -2  11   0  435.39   44.01
  -2  11  -1    6.50    3.33
  -2  11  -1   10.88    6.73
  -2  11  -1   10.22    8.71
  -2  11  -2 1190.99   72.41
  -2  11  -2 1262.90   67.60
  -2  11  -2 1071.46   47.67
  -2  11  -3  131.94   16.71
  -2  11  -3  135.36   19.61
  -2  11  -3  169.54   25.73
  -2  11  -4   48.74   11.85
  -2  11  -4   44.11    9.85
  -2  11  -4   47.60   13.71
  -2  11  -5  568.30   35.90
  -2  11  -5  559.67   41.99
  -2  11  -5  502.29   37.92
  -2  11  -6 1397.48   63.32
  -2  11  -6 1530.29   66.45
  -2  11  -6 1594.13   62.11
  -2  11  -7   76.16   13.91
  -2  11  -7   65.02   13.93
  -2  11  -7   80.64   14.56
  -2  11  -8    1.06    0.84
  -2  11  -8    5.72    2.95
  -2  11  -9  342.26   29.35
  -2  11  -9  731.54   42.18
  -2  11 -10   21.22    6.25
  -2  11 -10   15.05    5.26
  -2  11 -11  267.20   18.45
  -2  10   8   24.13    6.02
  -2  10   8   26.71    5.63
  -2  10   7  198.00   20.05
  -2  10   7  232.81   19.64
  -2  10   6   37.75    9.93
  -2  10   6   68.99   12.09
  -2  10   5   54.34   12.63
  -2  10   5   48.26   10.71
  -2  10   4  334.20   34.92
  -2  10   4  288.38   31.64
  -2  10   3  564.96   51.47
  -2  10   3  462.45   35.69
  -2  10   2    6.38    4.33
  -2  10   2   -0.16    3.56
  -2  10   2   -1.55    2.79
  -2  10   1   11.73    5.42
  -2  10   1    4.72    3.68
  -2  10   1    6.38    1.43
  -2  10   0 1765.48   61.39
  -2  10   0 1837.74   82.46
  -2  10  -1  361.49   30.10
  -2  10  -1  398.96   41.90
  -2  10  -1  418.13   37.23
  -2  10  -1  350.61   26.71
  -2  10  -2   51.81   11.36
  -2  10  -2   58.37   10.49
  -2  10  -2   62.19   13.73
  -2  10  -2   62.15   15.76
  -2  10  -3  491.64   34.67
  -2  10  -3  481.99   40.97
  -2  10  -3  519.75   32.06
  -2  10  -3  542.44   38.08
  -2  10  -4 1349.08   52.89
  -2  10  -4 1276.09   56.79
  -2  10  -4 1267.61   63.51
  -2  10  -4 1423.39   60.17
  -2  10  -5  135.04   18.88
  -2  10  -5  136.55   17.38
  -2  10  -5  124.27   19.21
  -2  10  -6  307.26   29.62
  -2  10  -6  319.82   28.06
  -2  10  -6  317.94   30.35
  -2  10  -7  139.44   19.49
  -2  10  -7  113.29   18.83
  -2  10  -7  157.42   27.20
  -2  10  -7  126.55   18.89
  -2  10  -8   53.69   13.18
  -2  10  -8   51.69   12.30
  -2  10  -8   72.45   15.84
  -2  10  -9  393.60   34.49
  -2  10  -9  525.19   39.31
  -2  10 -10  159.03   19.82
  -2  10 -10  134.18   18.96
  -2  10 -11   26.74    6.57
  -2  10 -12  439.20   22.57
  -2   9  10    0.17    0.62
  -2   9  10    2.63    1.52
  -2   9   9  563.82   30.09
  -2   9   9  530.21   26.11
  -2   9   8   32.45    9.06
  -2   9   8   36.56    8.03
  -2   9   7    8.03    5.00
  -2   9   6  530.10   37.34
  -2   9   5 1192.82   61.97
  -2   9   5  389.55   33.32
  -2   9   4   15.81    6.31
  -2   9   4   30.10    8.91
  -2   9   4   36.20   12.23
  -2   9   4   33.04   10.59
  -2   9   3  127.25   24.76
  -2   9   3  175.35   21.55
  -2   9   2 1829.39   98.75
  -2   9   2  509.94   50.00
  -2   9   2  974.51   61.06
  -2   9   2 1346.19   55.45
  -2   9   1  278.89   24.21
  -2   9   1  276.43   31.09
  -2   9   0  201.90   43.65
  -2   9   0  199.15   28.75
  -2   9   0  223.90   26.34
  -2   9   0  197.02   19.38
  -2   9   0  216.17   22.38
  -2   9  -1   30.45    7.49
  -2   9  -1   33.43    8.99
  -2   9  -1   18.52   12.91
  -2   9  -1   27.06   10.00
  -2   9  -1   22.70    6.88
  -2   9  -2  292.27   22.58
  -2   9  -2  304.47   25.46
  -2   9  -2  321.13   32.40
  -2   9  -2  363.39   29.27
  -2   9  -3  440.65   28.06
  -2   9  -3  442.60   30.97
  -2   9  -3  450.38   36.52
  -2   9  -3  473.90   32.14
  -2   9  -4 1506.45   53.24
  -2   9  -4 1494.81   58.84
  -2   9  -4 1498.91   64.57
  -2   9  -4 1486.90   56.00
  -2   9  -5   35.54    8.47
  -2   9  -5   40.26   15.58
  -2   9  -5   25.92    8.24
  -2   9  -5   32.94    9.61
  -2   9  -6   21.12    7.57
  -2   9  -6   23.20   10.84
  -2   9  -6   31.19    8.92
  -2   9  -6   24.19    8.33
  -2   9  -7 2174.43   77.39
  -2   9  -7 2237.75   98.24
  -2   9  -7 2026.41   76.73
  -2   9  -7 2077.07   80.58
  -2   9  -8 1305.35   67.03
  -2   9  -8 1364.11   65.17
  -2   9  -9    4.72    4.43
  -2   9  -9   -1.24    4.90
  -2   9  -9    5.94    3.61
  -2   9 -10    0.26    1.96
  -2   9 -10    4.44    1.81
  -2   9 -11  755.14   36.99
  -2   9 -11  753.47   45.29
  -2   9 -12   42.35    7.69
  -2   9 -12   45.07    9.12
  -2   9 -13  276.13   16.70
  -2   8  11  652.41   24.07
  -2   8  10  742.34   30.15
  -2   8  10  676.04   29.44
  -2   8   9   19.23    5.92
  -2   8   8   41.74    9.33
  -2   8   7 1502.07   62.50
  -2   8   6    0.26    2.71
  -2   8   6    6.32    2.98
  -2   8   5   56.03   12.79
  -2   8   5  128.06   20.83
  -2   8   4  165.34   21.64
  -2   8   4  172.84   26.59
  -2   8   4   65.78   15.58
  -2   8   4   70.10   13.90
  -2   8   3   31.15    9.82
  -2   8   3   36.61   12.72
  -2   8   2 1217.33   49.24
  -2   8   2 1147.87   47.10
  -2   8   2 1714.75   95.71
  -2   8   2  576.34   48.69
  -2   8   2 1089.90   57.97
   2  -8  -1  968.42   38.10
  -2   8   1 1021.50   41.93
  -2   8   0    8.55    3.61
   2  -8   0    6.79    2.97
   2  -8   1  442.55   22.93
  -2   8  -1  417.96   24.89
   2  -8   2 2583.07   56.56
  -2   8  -3  272.56   21.01
   2  -8   3  278.03   30.25
   2  -8   4    8.42    6.16
  -2   8  -4   10.36    4.03
  -2   8  -5 1192.40   47.45
  -2   8  -5 1186.59   52.28
  -2   8  -5 1238.94   83.61
  -2   8  -5 1178.36   46.19
  -2   8  -5 1060.35   50.74
  -2   8  -6 1307.06   53.97
  -2   8  -6 1337.38   60.03
  -2   8  -6 1219.62   74.85
  -2   8  -6 1164.84   54.79
  -2   8  -7   64.87   14.24
  -2   8  -7   60.10   14.77
  -2   8  -7   70.44   13.92
  -2   8  -8  619.87   43.90
  -2   8  -8  710.09   47.59
  -2   8  -8  674.43   49.17
  -2   8  -9  423.60   40.37
  -2   8  -9  424.87   37.50
  -2   8 -10   29.57   10.14
  -2   8 -10   61.85   13.33
  -2   8 -10   65.85   12.17
  -2   8 -11 1482.33   69.78
  -2   8 -11 1436.42   52.53
  -2   8 -12  569.26   37.53
  -2   8 -12  416.52   25.30
  -2   8 -13   14.21    4.79
  -2   8 -13    5.64    2.26
  -2   8 -14  367.03   16.94
  -2   7  12  488.27   20.31
  -2   7  12  478.37   20.10
  -2   7  11   31.68    6.14
  -2   7  11   29.28    6.00
  -2   7  10   22.14    5.99
  -2   7  10   17.57    5.30
  -2   7   9  157.62   17.75
  -2   7   9  163.91   18.32
  -2   7   8   18.69    6.82
  -2   7   8   16.24    6.14
  -2   7   7 1068.93   52.07
  -2   7   7 1202.72   56.92
  -2   7   6  319.73   30.36
  -2   7   6  289.35   28.90
  -2   7   5   48.28   11.91
  -2   7   5   69.80   15.18
   2  -7  -4 1563.51   58.11
  -2   7   4 1871.96   64.52
   2  -7  -3 2878.11   70.33
  -2   7   3 3115.73   75.67
   2  -7  -2   21.16    5.57
  -2   7   2   17.71    5.34
   2  -7  -1   31.40    6.23
   2  -7  -1   35.47    5.93
  -2   7   1   35.69    6.87
  -2   7   0 1514.28   43.68
   2  -7   0 1446.35   39.36
   2  -7   1  517.46   22.24
  -2   7  -1  505.86   21.58
  -2   7  -1  493.08   24.55
  -2   7  -2  365.82   21.05
  -2   7  -2  381.55   19.66
   2  -7   2  389.88   33.69
  -2   7  -3    8.80    3.36
  -2   7  -3    6.98    3.05
   2  -7   3    4.47    5.54
  -2   7  -4  107.34   12.30
  -2   7  -4  107.52   12.45
   2  -7   4   88.53   22.52
  -2   7  -5  530.63   30.57
  -2   7  -5  548.33   30.27
  -2   7  -6 1607.87   57.37
  -2   7  -6 1412.93   56.28
  -2   7  -7   65.40   14.51
  -2   7  -7   69.89   15.19
  -2   7  -7   91.22   18.07
  -2   7  -8  835.78   49.21
  -2   7  -8  790.87   54.70
  -2   7  -9  506.01   45.90
  -2   7  -9  891.60   47.64
  -2   7  -9  594.54   43.90
  -2   7  -9  782.85   64.67
  -2   7 -10  226.45   30.35
  -2   7 -10  240.29   36.07
  -2   7 -10  258.80   24.15
  -2   7 -11   -0.19    2.08
  -2   7 -11    0.63    0.32
  -2   7 -11    5.42    6.96
  -2   7 -12  324.98   30.47
  -2   7 -12  406.23   37.94
  -2   7 -13 1171.32   48.23
  -2   7 -13 1435.97   58.16
  -2   7 -14   -0.10    0.98
  -2   7 -14    1.62    1.10
  -2   7 -14    1.44    1.48
  -2   6  13  204.69   12.94
  -2   6  13  192.68   12.11
  -2   6  12  460.29   23.41
  -2   6  12  426.04   21.79
  -2   6  11   -0.91    1.18
  -2   6  11    1.36    1.48
  -2   6  10  263.13   22.26
  -2   6  10  246.72   21.31
  -2   6   9 1623.65   58.98
  -2   6   9 1558.13   57.67
  -2   6   8  847.57   44.54
  -2   6   8  865.52   45.56
  -2   6   7   12.88    4.51
  -2   6   7   30.38    9.48
   2  -6  -6  112.04   16.34
  -2   6   6  205.22   23.94
   2  -6  -5 1217.48   52.67
  -2   6   5 1931.35   66.47
  -2   6   4    3.65    2.46
   2  -6  -4    2.25    1.63
   2  -6  -3  387.29   22.79
  -2   6   3  446.87   25.43
   2  -6  -2  977.40   31.98
   2  -6  -2 1066.40   29.89
  -2   6   2 1045.30   35.85
   2  -6  -1   44.74    5.85
   2  -6  -1   37.93    5.94
  -2   6   1   47.03    7.24
  -2   6   0 1185.79   30.92
   2  -6   0 1263.10   30.89
  -2   6   0 1197.94   35.15
  -2   6  -1  550.56   21.30
  -2   6  -1  546.33   22.13
   2  -6   1  544.41   40.53
  -2   6  -1  570.36   24.03
  -2   6  -2   61.13    7.41
  -2   6  -2   64.88    7.71
  -2   6  -2   61.19    7.95
   2  -6   2   43.83   15.23
  -2   6  -3 1077.94   34.08
  -2   6  -3 1078.03   32.94
  -2   6  -4 2745.32   60.60
  -2   6  -4 2776.76   56.75
   2  -6   4 2673.40   67.70
  -2   6  -5  579.16   28.74
  -2   6  -5  523.72   29.99
  -2   6  -6   39.80    8.53
   2  -6   6   11.24    5.76
  -2   6  -6   29.55    8.15
   2  -6   6   50.39   13.21
  -2   6  -7 1175.55   52.79
  -2   6  -7  689.03   43.60
   2  -6   7  877.05   44.41
   2  -6   7 1454.27   65.38
  -2   6  -8 1225.88   56.54
  -2   6  -8  941.90   59.65
  -2   6  -9  133.32   17.76
  -2   6  -9   70.99   16.95
  -2   6 -10   32.39   11.38
  -2   6 -10   27.93    7.67
  -2   6 -11  482.46   42.32
  -2   6 -11  378.70   26.76
  -2   6 -12   69.98   10.68
  -2   6 -12   86.25   11.40
  -2   6 -12  109.78   18.28
  -2   6 -13 1005.41   36.80
  -2   6 -13 1120.59   37.94
  -2   6 -14  336.39   22.04
  -2   6 -14  294.74   16.75
  -2   6 -14  295.76   16.57
  -2   5  14  875.67   25.69
  -2   5  13   71.58    8.82
  -2   5  13   70.79    8.31
  -2   5  12   73.21   10.22
  -2   5  12   70.14    9.58
  -2   5  11 1144.21   43.23
  -2   5  11 1141.00   44.45
  -2   5  10  522.72   32.09
  -2   5  10  508.65   31.14
  -2   5   9  320.89   25.92
  -2   5   9  315.36   26.20
  -2   5   8    0.20    2.24
  -2   5   8    3.01    2.50
  -2   5   7  200.28   24.50
   2  -5  -7  247.81   22.20
   2  -5  -6   22.70    6.48
   2  -5  -6    4.72    2.84
  -2   5   6   19.77    6.92
  -2   5   5  994.71   37.79
  -2   5   5 1027.41   44.30
  -2   5   4 1378.22   38.13
  -2   5   4 1368.97   44.75
   2  -5  -3   11.00    3.03
  -2   5   3    7.37    3.08
  -2   5   3   10.71    2.91
   2  -5  -3    9.38    3.55
   2  -5  -2 2322.57   37.79
  -2   5   2 2252.28   46.65
  -2   5   2 2327.49   37.49
   2  -5  -1 1630.33   32.99
  -2   5   1 1646.14   37.86
  -2   5   1 1677.06   28.57
  -2   5   0  125.79   10.30
   2  -5   0  131.00    8.64
  -2   5   0  122.13    9.22
  -2   5   0  130.97    7.57
  -2   5  -1  322.62   15.37
  -2   5  -1  327.30   14.75
  -2   5  -1  330.10   16.74
  -2   5  -2 3703.54   55.30
  -2   5  -2 3700.62   50.77
  -2   5  -2 3792.13   58.18
  -2   5  -3   88.44    8.35
  -2   5  -3   96.77    9.84
   2  -5   3  101.88   11.75
  -2   5  -4  326.29   17.86
  -2   5  -4  312.27   20.12
   2  -5   4  267.00   22.59
  -2   5  -5   68.56    9.37
  -2   5  -5   57.90    9.82
  -2   5  -6  875.91   38.92
   2  -5   6 1008.96   53.26
  -2   5  -6  636.56   37.43
   2  -5   6  707.45   40.42
  -2   5  -7  708.26   39.95
   2  -5   7  801.61   39.92
   2  -5   7  824.62   44.26
  -2   5  -8  508.31   42.51
  -2   5  -8  892.15   45.91
   2  -5   8  868.29   40.56
  -2   5  -8  579.39   40.03
  -2   5  -8  359.92   33.29
   2  -5   8  836.48   42.59
  -2   5  -9   -1.96    5.29
  -2   5  -9    0.20    0.88
  -2   5 -10   77.06   16.70
  -2   5 -10   57.92   10.70
  -2   5 -10   80.29   12.82
  -2   5 -11 1716.97   77.40
  -2   5 -11 1495.30   54.43
  -2   5 -12  246.13   20.15
  -2   5 -12  286.32   22.15
  -2   5 -13   13.83    4.55
  -2   5 -13   13.30    4.13
  -2   5 -13   21.78    7.19
  -2   5 -14  320.73   22.24
  -2   5 -14  271.14   17.02
  -2   5 -15  763.49   26.21
  -2   5 -15  900.23   31.87
  -2   4  14   45.97    6.71
  -2   4  14   45.31    6.03
  -2   4  13  248.87   17.13
  -2   4  13  246.30   17.95
  -2   4  12  152.64   15.57
  -2   4  12  143.92   14.66
  -2   4  11  838.29   37.83
  -2   4  11  852.63   39.71
  -2   4  10  203.46   19.67
  -2   4  10  211.58   20.73
  -2   4   9  136.70   17.39
  -2   4   9  129.01   17.73
  -2   4   9  144.03   17.33
  -2   4   8  199.85   24.33
   2  -4  -8  496.59   28.15
  -2   4   8  583.93   36.00
   2  -4  -8  345.06   24.43
  -2   4   7 1041.50   52.19
  -2   4   7  866.20   42.66
  -2   4   6  225.74   19.65
   2  -4  -6  183.86   17.90
  -2   4   5   76.75   11.20
  -2   4   5   76.29    9.80
   2  -4  -5   99.20   13.83
  -2   4   4 3566.28   66.37
   2  -4  -4 3722.58   89.72
  -2   4   4 3508.76   54.81
   2  -4  -3 4073.66   63.35
   2  -4  -3 4023.23   48.06
  -2   4   3 4114.45   61.74
   2  -4  -2   36.10    4.94
  -2   4   2   35.65    3.82
   2  -4  -2   27.96    7.10
  -2   4   2   35.58    5.25
   2  -4  -2   33.72    3.61
   2  -4  -2   36.76    3.98
  -2   4   1  129.90    8.96
   2  -4  -1  138.25    7.27
   2  -4  -1  133.24   11.89
  -2   4   1  112.05   17.60
  -2   4   1  128.06    6.32
   2  -4  -1  123.34    7.69
  -2   4   1  129.11    9.51
   2  -4   0 1544.13   28.45
  -2   4   0 1535.40   30.44
  -2   4   0 1491.47   26.36
  -2   4   0 1477.56   20.48
  -2   4   0 1538.54   32.50
  -2   4  -1  203.47   11.48
  -2   4  -1  213.23   10.02
  -2   4  -1  222.99   27.38
   2  -4   1  233.20   13.10
  -2   4  -1  223.30   12.54
  -2   4  -2 2709.77   37.50
   2  -4   2 2795.53   61.55
  -2   4  -3  432.83   16.81
  -2   4  -3  442.76   20.55
  -2   4  -4  120.37   10.41
  -2   4  -4  118.09   12.09
   2  -4   4   89.04   14.47
  -2   4  -5 1349.89   41.35
   2  -4   5 1386.17   54.13
  -2   4  -6 3056.16   72.54
   2  -4   6 2998.66   82.10
   2  -4   7  135.59   16.42
  -2   4  -7  108.61   15.50
  -2   4  -8   57.08   12.71
  -2   4  -8   58.10   12.23
   2  -4   8   75.11   11.99
  -2   4  -9  973.16   59.21
  -2   4  -9 1108.10   47.55
  -2   4 -10  794.76   41.46
  -2   4 -10  646.58   35.10
  -2   4 -10  758.39   51.53
  -2   4 -11   33.41    7.75
  -2   4 -11   47.72    9.89
  -2   4 -11   42.61   11.54
  -2   4 -12  126.33   18.29
  -2   4 -12   97.25   12.17
  -2   4 -12  109.30   14.20
  -2   4 -13   37.22    9.03
  -2   4 -13   31.68    6.83
  -2   4 -14  109.34   11.18
  -2   4 -14  131.67   14.11
  -2   4 -15  603.43   23.90
  -2   4 -15  865.55   34.39
  -2   3  15   69.20    7.58
  -2   3  14    2.83    2.04
  -2   3  14    1.38    0.48
  -2   3  13  915.68   34.56
  -2   3  13  909.51   36.69
  -2   3  12 1060.44   42.69
  -2   3  12 1102.00   41.47
  -2   3  11  101.69   13.91
  -2   3  11  100.48   13.16
  -2   3  11   91.31   13.34
  -2   3  10   53.60    9.95
  -2   3  10   50.15   10.36
  -2   3  10   55.60   10.75
  -2   3   9 2071.88   69.29
  -2   3   9 2141.21   69.29
  -2   3   9 2237.65   66.61
   2  -3  -8  506.68   28.10
  -2   3   8  543.87   34.59
   2  -3  -8  454.37   27.66
   2  -3  -7   52.74    9.53
  -2   3   7   45.00    9.43
   2  -3  -7   53.62    9.72
  -2   3   6  279.40   22.97
   2  -3  -6  326.87   22.96
   2  -3  -6  290.31   23.25
   2  -3  -5  263.02   22.10
   2  -3  -5  350.19   24.18
   2  -3  -4 1124.90   42.54
  -2   3   4 1717.23   41.79
   2  -3  -4 1341.51   44.16
  -2   3   4 1771.41   37.79
   2  -3  -4 1068.72   33.75
  -2   3   3 3397.76   51.06
  -2   3   3 3633.45   40.33
   2  -3  -3 3212.26   60.76
   2  -3  -3 3391.88   43.65
  -2   3   3 3340.58   36.99
   2  -3  -3 3518.80   57.49
   2  -3  -2   76.90    7.13
  -2   3   2   69.37    6.49
  -2   3   2   75.88    4.33
   2  -3  -2   72.71    6.45
   2  -3  -2   69.37    4.37
  -2   3   2   70.43    5.71
   2  -3  -2   70.62    5.28
  -2   3   1  269.25   12.05
   2  -3  -1  277.20    8.12
   2  -3  -1  254.91   10.01
  -2   3   1  280.23   12.31
  -2   3   1  265.68   12.03
  -2   3   1  260.21    6.19
   2  -3  -1  251.50    9.55
  -2   3   0 1157.70   24.79
  -2   3   0 1232.79   29.17
  -2   3   0 1114.91   18.11
   2  -3   0 1185.99   13.67
  -2   3   0 1242.55   26.11
  -2   3  -1 3495.85   45.09
  -2   3  -1 3611.10   33.44
   2  -3   1 3568.80   29.63
   2  -3   1 3872.16  102.78
  -2   3  -1 3618.40   57.72
  -2   3  -1 3855.43   47.15
  -2   3  -2    5.01    1.93
  -2   3  -2   10.06    3.62
  -2   3  -2    9.30    1.96
  -2   3  -3  749.22   25.99
  -2   3  -3  779.02   21.76
  -2   3  -4 4753.53   76.75
  -2   3  -4 4853.52   68.13
   2  -3   5   21.82    7.03
  -2   3  -5   13.87    4.86
  -2   3  -5   15.24    4.60
  -2   3  -6  291.67   25.36
  -2   3  -6  408.50   27.33
   2  -3   7  143.03   15.99
  -2   3  -7  149.09   18.11
  -2   3  -8   60.69   13.01
  -2   3  -8   94.26   15.24
   2  -3   8  100.97   13.50
   2  -3   8   62.58   10.49
  -2   3  -9 1031.54   58.50
  -2   3  -9  922.27   42.46
  -2   3  -9 1086.73   50.51
  -2   3 -10  923.90   45.63
  -2   3 -10  972.17   55.66
  -2   3 -11   37.77   10.59
  -2   3 -11   33.49    7.63
  -2   3 -11   42.66    9.32
  -2   3 -12  457.01   29.00
  -2   3 -12  496.18   35.26
  -2   3 -13 1665.03   57.67
  -2   3 -13 1512.74   48.41
  -2   3 -14  291.65   20.52
  -2   3 -14  256.03   17.53
  -2   3 -15   15.94    4.18
  -2   3 -15   14.45    3.44
  -2   3 -15   16.93    3.84
  -2   2  15  365.16   19.05
  -2   2  14 1141.63   38.74
  -2   2  14 1143.22   34.98
  -2   2  13   18.92    5.13
  -2   2  13   25.51    6.53
  -2   2  12   11.55    4.27
  -2   2  12    5.76    2.99
  -2   2  12    5.12    3.38
  -2   2  11  457.26   28.53
  -2   2  11  481.01   31.27
  -2   2  11  444.86   28.96
  -2   2  10  179.82   19.77
  -2   2  10  170.80   17.90
  -2   2  10  160.24   18.08
   2  -2  -9  949.42   38.47
   2  -2  -9 1116.88   45.90
   2  -2  -8  457.13   27.46
   2  -2  -8  608.32   33.30
   2  -2  -7   15.70    5.11
   2  -2  -7   35.36    7.92
  -2   2   6  782.78   31.63
   2  -2  -6  546.77   30.86
   2  -2  -5 3607.95   67.56
  -2   2   5 2847.08   51.21
  -2   2   4   96.48    7.19
  -2   2   4   97.32    6.93
   2  -2  -4   75.99    7.97
  -2   2   3  502.37   17.61
  -2   2   3  532.86   15.27
   2  -2  -3  492.76   16.68
   2  -2  -3  467.63   14.58
   2  -2  -3  493.11   12.64
  -2   2   2 1017.48   21.99
  -2   2   2 1057.06   20.62
   2  -2  -2 1020.49   16.49
   2  -2  -2 1045.33   20.12
  -2   2   2 1050.49   12.97
   2  -2  -1 7888.50   25.54
  -2   2   1 7898.00   57.82
   2  -2  -1 7517.55   62.78
  -2   2   1 7397.00   55.32
   2  -2  -1 7962.41   43.58
  -2   2   0  134.12    7.93
  -2   2   0  144.16    7.85
   2  -2   0  137.35    3.92
   2  -2   0  138.53    3.65
  -2   2   0  135.44    4.10
   2  -2   0  144.44    6.25
  -2   2   0  130.51    7.84
   2  -2   0  133.16   10.14
  -2   2  -1 1316.78   16.56
  -2   2  -1 1304.05   25.90
   2  -2   1 1279.23   25.94
   2  -2   1 1283.41   20.67
  -2   2  -1 1286.70   26.35
  -2   2  -2  215.13   11.59
  -2   2  -2  223.83    9.61
  -2   2  -2  212.14   12.09
  -2   2  -3  181.94   13.05
  -2   2  -3  214.93   13.53
  -2   2  -3  216.49   12.58
  -2   2  -4 4063.64   69.52
  -2   2  -4 3520.36   66.49
  -2   2  -5  405.35   26.15
  -2   2  -5  350.63   23.66
  -2   2  -6    3.63    2.48
   2  -2   6   10.73    4.68
  -2   2  -6    6.69    3.43
   2  -2   7 1185.52   42.94
  -2   2  -7 1162.51   53.14
   2  -2   7 2466.78   68.05
   2  -2   7 2526.06   64.58
  -2   2  -7 2235.56   70.52
   2  -2   8 2624.11   71.15
  -2   2  -8 2668.64   79.13
  -2   2  -9   99.00   17.89
  -2   2  -9   77.48   12.12
  -2   2  -9   93.29   14.82
  -2   2 -10   98.31   16.99
  -2   2 -10   78.40   12.00
  -2   2 -10  100.40   15.35
  -2   2 -11 1258.81   58.00
  -2   2 -11 1221.00   51.20
  -2   2 -12  309.91   24.23
  -2   2 -12  311.53   26.67
  -2   2 -13  298.27   23.47
  -2   2 -13  277.50   20.90
  -2   2 -14   22.18    5.37
  -2   2 -14   20.30    5.12
  -2   1  16  178.15   11.22
  -2   1  15   40.10    6.49
  -2   1  14  900.01   36.01
  -2   1  13   30.26    6.96
  -2   1  13   33.57    7.60
  -2   1  13   32.05    6.55
  -2   1  12   10.31    3.76
  -2   1  12   12.52    5.23
  -2   1  12    8.32    4.27
  -2   1  11 1334.00   49.83
  -2   1  11 1369.62   49.99
  -2   1  10 1945.63   60.83
  -2   1  10 1933.71   62.23
  -2   1  10 1905.31   60.76
   2  -1 -10 2075.51   67.28
   2  -1  -9    4.71    2.82
   2  -1  -9    4.75    2.15
   2  -1  -8   70.83   11.68
   2  -1  -8  188.61   19.19
  -2   1   7 2931.61   65.05
   2  -1  -7 2363.66   66.28
   2  -1  -6  348.85   21.62
   2  -1  -6  524.37   31.20
   2  -1  -5  563.25   15.07
   2  -1  -5  514.42   21.09
   2  -1  -5  524.10   29.61
   2  -1  -4  712.01   21.26
   2  -1  -4  700.40   19.46
  -2   1   3  793.34   20.03
   2  -1  -3  854.90   18.38
  -2   1   3  817.06   20.05
   2  -1  -3  826.13   17.85
  -2   1   2 5906.79   46.12
  -2   1   2 5878.45   50.09
   2  -1  -2 6014.92   51.00
   2  -1  -2 6183.49   45.34
   2  -1  -2 4988.13   33.92
  -2   1   2 5208.86   52.39
  -2   1   1  718.29   17.36
   2  -1  -1  791.01   20.77
  -2   1   1  789.58   15.72
  -2   1   1  728.51   17.30
   2  -1  -1  799.29   16.33
  -2   1   0    8.14    1.84
   2  -1   0    8.88    1.84
  -2   1   0    8.59    2.07
  -2   1   0    9.58    1.79
   2  -1   0    7.95    0.79
  -2   1  -1 2371.19   32.92
   2  -1   1 2265.23   30.63
   2  -1   1 2334.42   22.01
   2  -1   1 2361.21   29.75
   2  -1   1 2425.42   50.21
  -2   1  -1 2232.41   32.12
  -2   1  -2 5567.48   56.80
   2  -1   2 5321.54   55.30
   2  -1   2 5028.39   60.39
   2  -1   2 5491.71   51.80
  -2   1  -2 5136.42   53.34
  -2   1  -2 4780.65   50.45
  -2   1  -3 2082.36   40.70
  -2   1  -3 1752.65   35.01
  -2   1  -3 1440.55   38.93
   2  -1   3 1135.12   36.63
   2  -1   3  942.69   39.85
  -2   1  -4  172.91   15.90
  -2   1  -4  197.18   15.34
   2  -1   4  216.08   19.86
  -2   1  -4  184.99   13.60
   2  -1   5 1525.76   51.96
  -2   1  -5 1354.39   47.46
   2  -1   6 2340.72   62.77
  -2   1  -6 2212.66   63.31
  -2   1  -7   19.19    6.40
   2  -1   7   33.28    8.17
   2  -1   8  193.96   19.96
   2  -1   8  205.24   20.61
  -2   1  -8  225.53   22.77
  -2   1  -9  358.24   29.65
  -2   1 -10   58.26   11.66
  -2   1 -10   70.40   14.05
  -2   1 -11 1007.84   50.29
  -2   1 -11  969.19   46.46
  -2   1 -12  505.10   32.64
  -2   1 -12  477.75   30.42
  -2   1 -13    1.25    1.12
  -2   1 -13    1.07    0.74
  -2   1 -14  467.92   23.17
  -2   1 -14  479.95   23.68
  -2   0  16 1141.70   29.21
  -2   0  15  528.33   24.57
   2   0 -15  543.46   24.36
  -2   0  14   14.07    4.41
   2   0 -14   12.85    4.16
   2   0 -13  829.99   37.19
  -2   0  13  819.54   36.13
  -2   0  12 1287.75   47.21
   2   0 -12 1194.74   46.90
  -2   0  12 1322.46   53.21
  -2   0  12 1064.62   43.71
  -2   0  12 1143.09   46.72
  -2   0  11   15.83    6.57
  -2   0  11    9.76    4.34
  -2   0  11   12.10    5.71
   2   0 -11   11.66    4.78
  -2   0  11   11.30    4.62
   2   0 -10  161.08   16.32
   2   0 -10  238.44   23.28
  -2   0   9  620.32   29.90
   2   0  -9  630.25   36.43
   2   0  -8   26.08    7.29
  -2   0   8   30.15    6.43
   2   0  -8    9.67    4.22
   2   0  -7 1934.52   56.26
   2   0  -7 1551.79   51.47
   2   0  -6  509.16   26.56
  -2   0   6  547.19   27.53
   2   0  -5   27.67    4.59
   2   0  -5   29.86    4.66
  -2   0   5   24.44    5.37
   2   0  -5   29.64    4.09
   2   0  -5   18.53    3.93
  -2   0   5   22.72    5.39
   2   0  -4 2700.45   40.11
   2   0  -4 2774.39   37.14
   2   0  -4 2755.16   38.58
  -2   0   4 2758.50   40.70
  -2   0   4 2737.16   52.52
   2   0  -3 6661.19   54.97
   2   0  -3 6569.64   56.34
  -2   0   3 6461.58   45.74
  -2   0   3 6770.53   74.64
  -2   0   2 2163.77   23.00
   2   0  -2 2302.12   17.31
  -2   0   2 2124.94   31.56
  -2   0   2 2081.37   18.54
   2   0  -2 2206.56   33.97
   2   0  -2 2273.85   30.95
  -2   0   1  614.96   16.35
   2   0  -1  628.05   11.53
   2   0  -1  660.52   16.72
  -2   0   1  657.59   11.17
  -2   0   0 5778.94   46.12
  -2   0   0 5815.99   65.74
  -2   0   0 5750.21  110.92
   2   0   0 6031.48   38.23
   2   0   0 5749.30   50.00
  -2   0   0 5541.33   49.16
  -2   0  -1  317.40   11.39
   2   0   1  349.82   18.99
  -2   0  -1  279.29   26.82
  -2   0  -1  321.05   12.35
   2   0   1  300.47   12.47
   2   0   1  310.28   10.04
  -2   0  -2  711.05   19.13
   2   0   2  687.10   21.61
   2   0   2  725.31   19.72
  -2   0  -2  668.58   18.86
  -2   0  -3   37.44    5.22
   2   0   3   14.46    4.49
   2   0   3   35.52    5.64
  -2   0  -3   53.43    9.44
  -2   0  -3   49.87   10.25
  -2   0  -3   34.21    4.75
   2   0   3   32.38    5.92
   2   0   4  255.87   19.53
  -2   0  -4  706.65   36.88
   2   0   4  487.96   29.01
  -2   0  -4  478.66   20.68
  -2   0  -4  501.36   22.90
   2   0   4  325.03   20.54
  -2   0  -4  783.54   35.67
   2   0   5   54.65    9.91
   2   0   5   33.23    7.34
  -2   0  -5   78.26   10.66
   2   0   5  171.67   17.15
  -2   0  -5  173.86   16.88
  -2   0  -5   89.18   10.40
   2   0   6  960.34   44.08
   2   0   6  708.68   37.32
   2   0   7   83.29   13.36
   2   0   7   88.03   13.66
  -2   0  -7  125.58   14.80
  -2   0  -8   19.88    6.87
   2   0   8   13.51    5.43
  -2   0  -9 2301.29   78.70
  -2   0 -10 1176.79   54.01
  -2   0 -11    5.15    3.92
  -2   0 -11    4.61    2.87
  -2   0 -12  104.52   14.23
  -2   0 -12  118.24   14.96
  -2   0 -13  821.84   34.47
  -2   0 -13  850.18   35.29
  -2   0 -14  166.05   12.81
  -2   0 -14  175.56   13.26
   2   1 -16   51.34    6.61
  -2  -1  15   40.87    6.72
   2   1 -15   36.19    6.72
  -2  -1  14   58.89    9.63
   2   1 -14   61.60    9.73
   2   1 -13  119.70   15.06
  -2  -1  13  103.59   12.88
  -2  -1  13  122.50   15.27
   2   1 -12  730.97   38.99
  -2  -1  12  707.35   36.35
  -2  -1  12  715.10   38.70
  -2  -1  11    6.14    4.69
  -2  -1  11    8.41    4.16
   2   1 -11    5.23    2.61
  -2  -1  11    7.51    4.30
  -2  -1  10    8.00    3.38
   2   1 -10   10.87    4.82
   2   1 -10    5.32    3.52
  -2  -1   9 2389.38   61.07
   2   1  -9 2081.46   67.56
  -2  -1   8 1003.44   40.96
   2   1  -8  974.51   42.98
  -2  -1   7   19.20    5.34
  -2  -1   7   28.81    7.46
   2   1  -7   21.54    5.49
   2   1  -7   36.07    7.09
  -2  -1   6  772.75   28.91
   2   1  -6  817.62   28.91
   2   1  -6  844.80   27.84
   2   1  -6  840.18   28.22
   2   1  -5 4173.99   53.43
  -2  -1   5 4127.81   53.52
   2   1  -5 4139.55   54.08
   2   1  -5 4241.69   56.12
   2   1  -4  222.33   12.09
   2   1  -4  212.69    9.75
  -2  -1   4  215.31   10.38
  -2  -1   4  232.04   16.28
   2   1  -4  227.85   11.77
   2   1  -3 1650.35   32.82
  -2  -1   3 1744.81   39.93
   2   1  -3 1684.55   29.97
   2   1  -2  524.20   13.76
  -2  -1   2  510.42   16.27
   2   1  -2  555.93   12.62
  -2  -1   2  525.86    7.76
   2   1  -2  539.57   16.56
   2   1  -2  554.27   19.36
  -2  -1   2  535.62   20.04
  -2  -1   1 2751.47   36.63
  -2  -1   1 2751.03   32.98
   2   1  -1 2867.73   38.37
   2   1  -1 2864.90   31.85
  -2  -1   0  353.70   10.94
  -2  -1   0  370.95   13.34
   2   1   0  375.10   14.16
  -2  -1   0  392.92   15.89
   2   1   0  386.36   12.32
  -2  -1  -1  353.56   10.97
  -2  -1  -1  349.56   15.35
   2   1   1  387.16   20.97
  -2  -1  -1  393.82   20.86
  -2  -1  -1  350.95   13.39
   2   1   1  333.44   14.56
   2   1   1  339.76   12.71
  -2  -1  -2   36.58    3.96
  -2  -1  -2   31.01    6.31
   2   1   2   32.87    4.74
  -2  -1  -2   35.62    4.49
   2   1   2   29.00    6.41
   2   1   2   36.43    5.46
  -2  -1  -2   23.28    6.70
   2   1   3 1737.82   43.50
   2   1   3 1051.73   41.54
  -2  -1  -3 1726.11   33.68
  -2  -1  -3 1084.50   45.10
   2   1   3 1704.70   40.83
  -2  -1  -3 1062.98   40.23
   2   1   4 3221.07   74.24
  -2  -1  -4 3300.75   71.68
  -2  -1  -4 3055.91   52.30
   2   1   4 2498.96   58.63
  -2  -1  -4 2661.90   70.01
   2   1   4 2646.27   62.24
  -2  -1  -5  622.12   32.75
   2   1   5  284.08   23.06
   2   1   5  234.85   20.48
  -2  -1  -5  694.71   32.14
  -2  -1  -5  421.28   22.75
   2   1   6   16.87    6.01
   2   1   6    7.54    3.13
   2   1   7  459.09   33.70
   2   1   7  515.60   34.65
   2   1   8 2308.92   76.14
  -2  -1  -8 2479.41   86.76
   2   1   9   13.63    5.54
  -2  -1  -9   19.59    8.20
   2   1  10   30.46    8.18
  -2  -1 -10   32.71    9.40
  -2  -1 -11  293.55   24.82
   2   1  11  287.17   22.15
  -2  -1 -11  290.89   25.74
  -2  -1 -12    3.31    2.63
  -2  -1 -12    4.39    2.60
  -2  -1 -13  555.30   25.63
  -2  -1 -13  574.32   27.31
   2   2 -16   79.29    8.78
   2   2 -15  535.05   27.64
   2   2 -14 2404.15   65.57
  -2  -2  13  258.04   21.46
   2   2 -13  264.31   23.65
  -2  -2  13  265.76   22.83
  -2  -2  12    7.97    5.45
   2   2 -12    3.96    2.52
  -2  -2  12   11.24    5.88
  -2  -2  12    0.48    2.57
  -2  -2  11 1412.40   56.49
   2   2 -11 1368.29   57.93
  -2  -2  11 1425.63   58.59
   2   2 -10 1164.58   48.50
   2   2 -10 1130.68   54.10
  -2  -2  10 1224.78   46.63
  -2  -2   9   34.84    8.54
   2   2  -9   35.03    8.69
   2   2  -9   28.04    7.47
   2   2  -8    7.10    3.63
  -2  -2   8    6.22    3.17
  -2  -2   8    8.23    4.17
   2   2  -8   12.10    4.80
   2   2  -7 1048.98   37.46
  -2  -2   7  979.49   35.87
   2   2  -7 1015.12   35.58
  -2  -2   6    8.14    2.86
   2   2  -6    9.30    3.15
   2   2  -6   10.47    3.23
  -2  -2   6    4.53    3.26
   2   2  -6    7.43    2.89
   2   2  -5 1870.29   35.87
  -2  -2   5 1868.32   37.44
   2   2  -5 1809.68   40.51
   2   2  -5 1881.44   36.74
   2   2  -5 1954.20   39.59
  -2  -2   5 1770.00   53.26
   2   2  -4  248.01   11.50
   2   2  -4  259.45   15.11
   2   2  -4  273.32   13.68
  -2  -2   4  277.47   18.92
   2   2  -3  322.83   16.78
  -2  -2   3  313.57   17.88
   2   2  -3  305.01   11.85
   2   2  -3  302.00   13.61
   2   2  -3  309.00   12.97
  -2  -2   3  282.97   10.94
  -2  -2   2 1434.47   24.94
   2   2  -2 1571.92   26.78
  -2  -2   2 1449.89   29.18
   2   2  -2 1502.14   27.37
   2   2  -2 1487.04   30.02
  -2  -2   2 1521.30   35.72
  -2  -2   1 5426.30   52.48
  -2  -2   1 5759.81   56.44
   2   2  -1 5692.24   59.19
   2   2  -1 5775.41   54.51
  -2  -2   1 5493.75   63.40
   2   2   0  394.40   14.94
  -2  -2   0  417.86   15.14
  -2  -2   0  394.40   16.09
   2   2   0  374.84   15.72
  -2  -2   0  407.62   13.72
  -2  -2  -1  783.17   27.17
   2   2   1  774.95   33.37
   2   2   1  753.67   22.63
  -2  -2  -1  848.67   21.87
  -2  -2  -1  762.26   22.21
   2   2   1  749.49   24.15
  -2  -2  -2 1314.42   28.18
  -2  -2  -2 1195.85   35.41
   2   2   2 1236.35   32.87
   2   2   2 1250.30   35.06
  -2  -2  -2 1165.32   39.76
  -2  -2  -3  284.74   20.74
  -2  -2  -3  307.95   23.42
   2   2   3  416.88   22.20
  -2  -2  -3  415.17   16.92
   2   2   3  394.74   22.55
   2   2   3  266.03   21.95
   2   2   4   43.72    8.37
  -2  -2  -4   27.54    6.84
  -2  -2  -4   24.50    6.57
   2   2   4   43.77    8.53
   2   2   5   68.44   11.72
  -2  -2  -5  100.37   13.74
  -2  -2  -5  119.29   13.96
   2   2   5   69.07   11.79
   2   2   6   69.49   12.78
   2   2   6   63.24   12.19
  -2  -2  -6  226.01   20.46
  -2  -2  -6  232.22   19.38
   2   2   7   43.68   10.99
  -2  -2  -7   67.47   11.90
  -2  -2  -7   51.97   13.12
   2   2   8  436.53   34.72
  -2  -2  -8  464.80   39.75
   2   2   9   65.37   13.11
  -2  -2  -9   61.74   14.11
   2   2  10   62.92   11.22
  -2  -2 -10   73.94   14.08
  -2  -2 -11  832.88   38.60
   2   2  11  846.04   36.78
  -2  -2 -11  916.57   44.17
  -2  -2 -12  517.28   26.48
  -2  -2 -12  575.33   29.43
  -2  -2 -13   12.19    3.33
  -2  -2 -13   16.95    4.03
   2   3 -16 1216.67   36.11
   2   3 -15   83.98   11.03
   2   3 -14   50.13    9.77
  -2  -3  14   49.93    9.20
  -2  -3  13  213.42   21.13
   2   3 -13  194.42   21.49
  -2  -3  13  185.39   18.77
  -2  -3  12  907.64   45.93
   2   3 -12  963.24   50.62
  -2  -3  12 1022.44   50.48
  -2  -3  11  189.24   22.03
  -2  -3  11  169.13   21.15
   2   3 -10  229.65   24.83
  -2  -3  10  231.04   24.36
  -2  -3  10  246.23   24.47
  -2  -3  10  246.26   25.57
  -2  -3   9    3.55    2.18
   2   3  -9    5.51    3.07
   2   3  -9    0.86    1.27
  -2  -3   9    4.95    2.78
   2   3  -8  102.21   13.54
  -2  -3   8   96.42   13.01
   2   3  -8   82.11   12.04
  -2  -3   8  105.40   16.65
   2   3  -7 3109.08   64.48
   2   3  -7 3012.22   63.96
  -2  -3   7 3099.93   64.82
   2   3  -6 1141.26   34.01
   2   3  -6 1118.78   32.18
   2   3  -6 1176.99   35.61
  -2  -3   6 1155.69   35.50
   2   3  -5  140.28   10.54
   2   3  -5  143.63   13.09
   2   3  -5  145.38   10.38
   2   3  -5  147.81   11.50
  -2  -3   5  149.44   16.47
   2   3  -4 1101.67   36.28
   2   3  -4 1054.49   26.62
   2   3  -4 1107.64   29.45
  -2  -3   4 1170.82   41.35
   2   3  -3 4760.32   55.53
   2   3  -3 5226.42   80.12
  -2  -3   3 4406.91   51.50
   2   3  -3 4738.85   57.35
   2   3  -3 4681.53   57.73
  -2  -3   3 4962.00   75.27
  -2  -3   2  191.77   10.77
   2   3  -2  206.78   11.81
   2   3  -2  206.26   11.60
  -2  -3   2  207.96   11.69
   2   3  -2  208.99   12.11
   2   3  -2  239.62   17.87
  -2  -3   2  216.43   14.40
  -2  -3   1  148.46   10.11
  -2  -3   1  164.58   10.06
   2   3  -1  170.95   16.11
   2   3  -1  153.83   10.59
   2   3  -1  149.43   10.20
  -2  -3   1  161.22   11.47
   2   3   0 1918.25   38.34
  -2  -3   0 2106.55   35.74
  -2  -3   0 1899.65   39.62
   2   3   0 1970.83   39.97
  -2  -3   0 2035.23   36.52
  -2  -3  -1  870.70   26.59
   2   3   1  779.80   38.57
   2   3   1  871.11   28.81
  -2  -3  -1  850.71   29.76
  -2  -3  -1  963.02   24.65
   2   3   1  891.74   28.68
  -2  -3  -2 3588.17   48.19
  -2  -3  -2 3171.39   67.20
   2   3   2 3420.24   63.93
  -2  -3  -2 3198.53   60.97
   2   3   2 3454.69   63.39
  -2  -3  -3  527.15   31.54
  -2  -3  -3  577.86   30.98
   2   3   3  692.61   32.43
   2   3   3  706.89   32.65
  -2  -3  -4   24.44    7.02
  -2  -3  -4   24.65    6.65
   2   3   4   40.18    8.74
   2   3   4   47.78    9.66
  -2  -3  -5  308.87   24.46
   2   3   5  267.15   25.38
  -2  -3  -5  295.84   25.62
   2   3   5  297.81   26.58
   2   3   6  849.94   51.50
  -2  -3  -6  636.84   48.27
   2   3   7  341.44   32.70
  -2  -3  -7  374.34   36.79
   2   3   8   33.29   10.04
  -2  -3  -8   37.80    8.65
  -2  -3  -8   33.13   10.64
   2   3   9  928.31   47.61
  -2  -3  -9  877.02   37.56
  -2  -3  -9 1020.58   55.54
   2   3  10  341.01   25.91
  -2  -3 -10  380.83   30.55
  -2  -3 -11   14.86    4.91
   2   3  11   15.12    4.63
  -2  -3 -11   16.03    5.54
  -2  -3 -12   22.64    4.79
  -2  -3 -12   24.26    5.34
   2   4 -16  441.94   21.92
   2   4 -15  155.01   15.67
  -2  -4  14    7.66    3.59
   2   4 -14    4.46    2.93
  -2  -4  13  820.10   42.35
   2   4 -13  759.20   44.39
  -2  -4  13  765.86   40.37
  -2  -4  12 1251.17   56.66
  -2  -4  12 1352.91   60.18
   2   4 -12 1200.30   59.76
  -2  -4  11   75.53   14.68
  -2  -4  11   69.83   13.73
  -2  -4  10   13.14    5.73
   2   4 -10   17.68    5.94
  -2  -4  10    8.71    4.39
   2   4  -9 1408.71   57.90
  -2  -4   9 1393.64   57.73
  -2  -4   8 1152.98   46.95
   2   4  -8 1167.56   46.89
   2   4  -7   90.13   11.33
  -2  -4   7   87.36   11.54
   2   4  -7   96.88   11.81
  -2  -4   7   58.70   13.08
   2   4  -6   44.46    7.10
  -2  -4   6   36.73    7.00
   2   4  -6   43.47    6.44
   2   4  -6   50.91    7.68
  -2  -4   6   45.32   10.96
   2   4  -5 1139.85   33.37
   2   4  -5 1210.24   34.73
  -2  -4   5 1215.10   50.05
   2   4  -4  229.75   19.61
   2   4  -4  219.54   13.94
   2   4  -4  219.55   14.00
   2   4  -4  237.33   14.87
  -2  -4   4  203.36   12.82
  -2  -4   4  238.68   19.62
  -2  -4   3 2490.57   45.05
  -2  -4   3 2370.54   42.90
   2   4  -3 2468.84   46.25
   2   4  -3 2513.83   47.20
   2   4  -3 2466.83   45.28
   2   4  -2   27.66    7.52
  -2  -4   2   22.50    4.05
   2   4  -2   19.95    4.06
  -2  -4   2   19.54    3.95
   2   4  -2   21.35    4.23
  -2  -4   2   17.41    4.37
   2   4  -1    9.26    3.08
   2   4  -1    9.46    2.82
   2   4  -1   13.65    5.87
  -2  -4   1    8.32    2.67
  -2  -4   1   10.66    2.69
  -2  -4   1   10.48    3.24
   2   4   0 1949.30   44.81
   2   4   0 1863.90   69.08
  -2  -4   0 1895.74   44.40
   2   4   0 1994.36   44.48
  -2  -4   0 1944.21   41.73
   2   4   1 1868.19   46.62
  -2  -4  -1 1812.23   47.56
   2   4   1 1820.23   47.19
  -2  -4  -1 1775.59   43.60
  -2  -4  -2    1.62    0.41
  -2  -4  -2    0.10    1.85
   2   4   2    2.90    2.19
   2   4   2    3.63    2.42
  -2  -4  -3   17.40    5.71
  -2  -4  -3   15.23    5.23
   2   4   3   12.67    4.62
   2   4   3   12.10    4.72
  -2  -4  -4  895.17   45.60
  -2  -4  -4  922.37   48.69
   2   4   4 1358.36   55.40
   2   4   4 1306.53   56.85
  -2  -4  -5  135.57   22.77
   2   4   5  118.48   18.71
   2   4   6  108.64   19.64
  -2  -4  -6   90.89   18.94
   2   4   7  208.86   25.89
  -2  -4  -7  274.73   25.18
  -2  -4  -7  213.92   29.25
   2   4   7  261.26   25.54
   2   4   8  102.01   16.99
  -2  -4  -8   99.09   13.90
  -2  -4  -8  112.37   19.99
   2   4   8  105.26   14.81
   2   4   9  450.99   32.08
  -2  -4  -9  410.40   24.67
  -2  -4  -9  455.54   35.70
   2   4  10  491.08   28.88
  -2  -4 -10  447.62   21.63
  -2  -4 -10  521.35   32.36
  -2  -4 -11    6.74    2.55
  -2  -4 -11    4.42    2.44
   2   5 -16   47.10    6.81
   2   5 -15  283.79   20.85
   2   5 -14 1215.45   50.91
  -2  -5  13   15.97    5.29
   2   5 -13    9.39    4.66
  -2  -5  13    4.87    2.74
  -2  -5  12   27.44    8.27
  -2  -5  12   27.02    8.36
  -2  -5  11 1011.46   56.03
  -2  -5  11  996.07   54.04
  -2  -5  10   43.93   10.76
   2   5 -10   30.77    9.61
  -2  -5  10   25.81    8.95
   2   5  -9  764.01   47.80
  -2  -5   9  816.16   48.72
   2   5  -8  707.24   37.94
  -2  -5   8  641.77   36.04
   2   5  -7   31.86    7.38
   2   5  -7   24.45    6.37
  -2  -5   7   25.17    6.77
  -2  -5   7   15.77    7.22
   2   5  -6  420.09   23.95
  -2  -5   6  390.57   24.42
   2   5  -6  422.12   23.66
  -2  -5   6  434.57   35.16
   2   5  -5 2886.91   59.46
   2   5  -5 2892.28   57.83
  -2  -5   5 3027.52   58.17
  -2  -5   4  598.94   24.74
   2   5  -4  621.64   26.66
   2   5  -4  649.59   27.16
   2   5  -4  646.94   25.68
  -2  -5   4  683.65   34.98
  -2  -5   3   85.49    9.31
   2   5  -3   82.52    9.58
  -2  -5   3   90.23    9.00
   2   5  -3   79.87    8.89
   2   5  -3  102.88   16.99
   2   5  -3   84.39    9.63
  -2  -5   3   87.93   11.29
  -2  -5   2 1349.65   37.59
   2   5  -2 1344.42   38.55
  -2  -5   2 1401.90   33.86
  -2  -5   2 1326.19   40.33
   2   5  -2 1327.38   36.05
   2   5  -1  968.87   60.15
  -2  -5   1 1054.22   34.76
   2   5  -1 1044.11   33.18
   2   5  -1 1051.16   35.18
  -2  -5   1 1051.35   33.22
  -2  -5   1 1004.02   32.86
   2   5   0   10.78    3.88
   2   5   0    8.80    6.18
  -2  -5   0    9.41    3.53
   2   5   0   10.91    3.69
  -2  -5   0   12.93    4.20
  -2  -5  -1  142.85   14.14
   2   5   1  132.54   14.59
   2   5   1  136.52   13.86
  -2  -5  -1  129.14   14.14
  -2  -5  -2  379.30   25.79
   2   5   2  417.12   26.88
   2   5   2  397.71   28.05
  -2  -5  -2  373.32   27.33
   2   5   3    4.15    4.25
   2   5   3    5.69    4.87
  -2  -5  -3   -0.75    3.31
  -2  -5  -3   15.47    7.19
   2   5   3    7.11    4.63
  -2  -5  -3    3.25    1.31
   2   5   4  835.83   52.71
  -2  -5  -4  798.84   49.50
  -2  -5  -5  145.43   24.35
   2   5   5  203.85   25.53
   2   5   6   30.85    9.34
   2   5   6   20.52    8.46
  -2  -5  -6   43.40   10.97
  -2  -5  -6   16.64    8.05
   2   5   7  831.94   50.75
  -2  -5  -7  939.86   45.53
  -2  -5  -7  862.40   55.19
   2   5   7  929.42   47.61
   2   5   8 1174.71   54.81
  -2  -5  -8 1180.61   44.90
  -2  -5  -8 1192.54   58.17
   2   5   8 1188.71   47.23
  -2  -5  -9   44.83    7.55
  -2  -5  -9   46.21   10.32
   2   5   9   47.67    7.79
  -2  -5 -10    3.99    1.79
  -2  -5 -10    2.91    2.03
   2   6 -16  491.36   20.59
   2   6 -15   21.41    5.39
   2   6 -14  799.09   39.33
   2   6 -13  221.44   23.60
  -2  -6  13  221.54   21.44
  -2  -6  12    9.82    4.47
  -2  -6  11  166.68   23.15
  -2  -6  11  173.63   22.03
  -2  -6  10 1332.81   65.12
  -2  -6  10 1546.68   62.67
  -2  -6   9    9.11    4.26
   2   6  -9    5.70    4.24
  -2  -6   9    3.08    4.57
   2   6  -8   59.61   12.25
  -2  -6   8   51.36   12.05
  -2  -6   8   53.31    9.94
   2   6  -7 1532.84   54.48
   2   6  -7 1425.26   51.04
  -2  -6   7 1402.68   52.13
  -2  -6   7 1543.33   52.32
   2   6  -6  239.17   19.38
   2   6  -6  251.08   20.53
  -2  -6   6  223.76   19.53
  -2  -6   6  235.96   27.12
  -2  -6   6  259.73   20.01
  -2  -6   5  256.88   19.01
   2   6  -5  283.52   20.75
   2   6  -5  286.39   19.88
  -2  -6   5  330.22   28.54
  -2  -6   4   75.99    9.95
   2   6  -4   68.98   10.19
   2   6  -4   76.14    9.78
   2   6  -4   77.42   10.45
  -2  -6   4   78.25   12.47
  -2  -6   3  697.13   30.04
   2   6  -3  721.36   29.30
   2   6  -3  680.51   30.66
  -2  -6   3  708.25   33.94
   2   6  -2  224.37   17.82
  -2  -6   2  241.89   17.99
  -2  -6   2  229.71   17.73
   2   6  -1  791.64   34.81
  -2  -6   1  767.77   33.32
  -2  -6   1  785.35   32.51
  -2  -6   0    4.79    3.27
  -2  -6   0    6.33    3.62
   2   6   0    4.76    3.04
   2   6   1   33.78    9.02
  -2  -6  -1   24.23    7.62
  -2  -6  -1   34.52    8.92
  -2  -6  -1   35.10    7.94
  -2  -6  -2 1722.93   69.21
   2   6   2 1274.90   61.19
  -2  -6  -3  154.11   22.47
   2   6   3  313.32   32.14
   2   6   4   -2.75    5.09
  -2  -6  -4    1.93    3.65
  -2  -6  -4    3.72    4.12
   2   6   5   16.29    7.00
  -2  -6  -5    8.67    5.68
  -2  -6  -6 1627.54   62.70
   2   6   6 1444.24   63.06
  -2  -6  -7  179.06   18.53
  -2  -6  -7  179.01   21.81
   2   6   7  183.58   20.13
  -2  -6  -8   52.68    8.54
  -2  -6  -8   47.82    9.73
   2   6   8   46.89    8.51
  -2  -6  -9  110.84   10.05
  -2  -6  -9  115.30   11.47
   2   7 -15  434.10   21.76
   2   7 -14   31.35    7.08
   2   7 -13  243.74   23.16
  -2  -7  12  822.79   45.71
   2   7 -11   40.75   11.13
  -2  -7  11   37.57   10.03
  -2  -7  10   30.11    8.46
   2   7 -10   18.32    6.25
  -2  -7  10   24.85    8.85
   2   7  -9  165.55   22.27
  -2  -7   9  200.65   23.94
  -2  -7   9  189.04   19.93
   2   7  -8   82.17   14.73
  -2  -7   8   82.72   15.42
  -2  -7   8   98.24   13.59
   2   7  -7 1199.90   52.24
  -2  -7   7 1172.31   44.44
   2   7  -6  242.58   21.87
  -2  -7   6  238.95   19.48
  -2  -7   5   98.18   12.35
   2   7  -5  112.49   14.23
   2   7  -4  585.20   31.38
  -2  -7   4  527.70   28.19
  -2  -7   3 2167.57   57.70
   2   7  -3 2368.96   62.87
   2   7  -2  213.35   19.24
  -2  -7   1  172.06   17.50
  -2  -7   0  902.41   44.09
   2   7   0  934.43   48.32
  -2  -7  -1  447.35   34.15
  -2  -7  -1  567.81   38.95
   2   7   1  536.98   39.51
   2   7   2   35.95   11.26
  -2  -7  -2   16.15    6.77
  -2  -7  -2   44.39   11.96
   2   7   3    2.78    1.67
  -2  -7  -3    3.74    2.83
  -2  -7  -3    3.81    2.45
  -2  -7  -4  141.03   22.38
   2   7   4  166.33   23.90
   2   7   5   21.43    6.87
  -2  -7  -5   24.47    8.12
  -2  -7  -5    3.54    3.45
  -2  -7  -6  395.60   27.96
  -2  -7  -6  311.32   27.75
   2   7   6  386.92   29.65
  -2  -7  -7   52.23    8.72
   2   7   7   52.10    9.21
  -2  -7  -8    8.15    2.83
   2   8 -14  318.71   19.78
   2   8 -13   17.36    4.86
   2   8 -13   19.96    5.75
  -2  -8  12  196.00   20.57
   2   8 -11   16.17    6.14
  -2  -8  11    8.94    4.65
   2   8 -10   28.78    9.01
  -2  -8  10   27.95    9.23
  -2  -8   9  681.28   44.02
  -2  -8   9  732.36   37.89
   2   8  -9  687.77   45.15
   2   8  -8  953.82   50.84
  -2  -8   8  944.50   51.18
  -2  -8   8  947.04   41.90
   2   8  -7   22.89    8.69
  -2  -8   7   15.18    4.86
  -2  -8   6  266.82   20.97
   2   8  -6  291.00   25.33
   2   8  -5 1940.02   63.80
  -2  -8   5 1818.54   54.48
   2   8  -4  282.02   23.64
  -2  -8   4  261.85   20.92
  -2  -8   3   16.41    5.41
   2   8  -3   18.24    5.63
   2   8  -2  150.45   17.54
  -2  -8   2  141.17   16.11
   2   8  -1  594.38   35.82
   2   8   0  234.09   23.23
  -2  -8   0  187.83   20.60
  -2  -8  -1  377.32   31.40
   2   8   1  493.28   34.69
   2   8   1  415.24   35.96
   2   8   2   13.59    6.36
   2   8   2   24.53    8.11
  -2  -8  -2   13.09    6.25
   2   8   3    8.05    4.61
  -2  -8  -3   25.61    8.56
  -2  -8  -4  669.83   40.44
   2   8   4  511.35   38.14
  -2  -8  -5  378.18   27.02
   2   8   5  334.11   27.45
  -2  -8  -6   26.44    6.01
  -2  -8  -7  485.36   21.11
   2   9 -13   88.89   10.04
   2   9 -13  123.23   12.59
   2   9 -12    9.22    3.86
   2   9 -12   15.26    4.64
  -2  -9  12    6.91    3.03
   2   9 -11  457.45   34.74
  -2  -9  11  306.41   25.94
   2   9 -10 1120.86   56.97
  -2  -9  10 1166.55   54.02
   2   9  -9    0.36    2.46
  -2  -9   9    0.66    0.98
   2   9  -8  204.51   23.98
  -2  -9   8  185.96   22.44
   2   9  -7  719.38   42.90
  -2  -9   7  623.89   41.82
  -2  -9   7  655.68   33.06
  -2  -9   6  100.79   12.96
   2   9  -6  102.33   15.81
  -2  -9   5  699.11   34.08
   2   9  -5  764.34   41.88
  -2  -9   4  143.34   15.58
   2   9  -4  144.93   17.93
   2   9  -4  155.73   19.35
  -2  -9   3   22.05    6.40
   2   9  -3   24.57    7.76
  -2  -9   2  408.73   28.02
   2   9  -2  442.06   31.89
  -2  -9   1 1070.95   47.25
   2   9  -1 1158.61   52.57
  -2  -9   0   66.76   12.01
   2   9   0   72.49   13.29
   2   9   1   13.15    5.51
  -2  -9  -1    6.00    4.01
  -2  -9  -2  239.61   23.36
  -2  -9  -3  218.40   21.14
  -2  -9  -4   17.71    5.31
  -2  -9  -5   26.17    5.73
   2   9   5   21.08    4.88
   2  10 -12  338.12   20.45
   2  10 -11   73.14   12.33
   2  10 -11   57.79   10.75
   2  10 -10  221.17   23.77
  -2 -10  10  195.66   20.33
   2  10  -9   17.87    6.77
  -2 -10   9    8.33    4.37
   2  10  -8    7.61    3.29
  -2 -10   8    4.64    3.81
   2  10  -7  825.58   46.77
  -2 -10   7  760.26   45.75
   2  10  -6  820.69   46.28
  -2 -10   6  728.38   33.50
  -2 -10   5    9.21    4.44
   2  10  -5    2.28    3.24
  -2 -10   4  278.96   21.28
   2  10  -4  326.15   28.37
   2  10  -4  303.67   26.41
   2  10  -3 1437.57   59.08
  -2 -10   3 1318.66   47.83
   2  10  -3 1418.94   62.89
   2  10  -2  111.78   16.39
   2  10  -2  106.42   19.01
  -2 -10   2  113.72   14.28
  -2 -10   1   65.16   11.17
   2  10  -1   55.90   11.68
   2  10  -1   60.45   15.02
  -2 -10   0  159.35   17.68
   2  10   0  131.57   17.36
  -2 -10  -1   69.33   11.48
   2  10   1  147.77   21.52
  -2 -10  -2   73.20   10.19
  -2 -10  -2   51.40    9.37
  -2 -10  -3  231.36   17.88
  -2 -10  -3  257.22   17.07
   2  11  -9  419.09   32.82
  -2 -11   9  348.63   26.27
   2  11  -8  410.13   34.20
  -2 -11   8  348.14   28.42
   2  11  -7   55.74   12.83
  -2 -11   7   47.94   11.55
   2  11  -6   12.79    6.11
  -2 -11   6   12.02    6.40
   2  11  -5  684.23   43.82
  -2 -11   5  563.49   42.35
  -2 -11   4   16.54    4.78
   2  11  -4   17.39    7.18
   2  11  -4   17.26    6.14
   2  11  -3  597.56   39.78
  -2 -11   3  553.93   29.04
   2  11  -3  563.37   36.66
  -2 -11   2   41.02    8.11
   2  11  -2   33.63    9.35
  -2 -11   1   42.44    8.05
   2  11  -1   33.30    9.22
  -2 -11   0  124.55   13.27
   2  11   0  279.65   26.10
   2  11   1  594.23   33.05
  -3  13   1  846.40   65.95
  -3  13   0  414.75   53.19
  -3  13  -1  120.51   28.96
  -3  13  -2   17.90   10.37
  -3  13  -3  276.93   37.80
  -3  13  -4  175.21   26.78
  -3  13  -5  713.87   48.45
  -3  13  -6    3.46    2.41
  -3  12   4  141.72   17.73
  -3  12   3    8.03    5.01
  -3  12   3   11.69    6.37
  -3  12   2   29.17   11.96
  -3  12   2    6.88    6.04
  -3  12   1  750.29   70.23
  -3  12   1  430.58   42.12
  -3  12   0  131.34   30.32
  -3  12   0  211.37   29.97
  -3  12  -1   39.86   16.97
  -3  12  -1   86.40   20.89
  -3  12  -2  171.54   31.68
  -3  12  -3 1433.79   83.44
  -3  12  -4  357.97   32.98
  -3  12  -4  373.23   39.20
  -3  12  -5   25.99    9.10
  -3  12  -5   18.85    7.59
  -3  12  -6  284.55   28.78
  -3  12  -6  294.53   29.73
  -3  12  -7  269.75   26.92
  -3  12  -7  381.53   30.87
  -3  12  -8   43.39   10.09
  -3  11   6  899.05   36.36
  -3  11   5   11.25    4.53
  -3  11   5   60.76   11.57
  -3  11   4    1.11    2.69
  -3  11   4    0.12    3.77
  -3  11   3  562.21   35.27
  -3  11   3  427.04   41.44
  -3  11   2  463.81   31.68
  -3  11   2  313.01   35.70
  -3  11   1   60.34   20.50
  -3  11   1   87.06   18.51
  -3  11   0  118.26   28.81
  -3  11   0  180.60   25.73
  -3  11  -1  909.50   74.30
  -3  11  -1  949.51   54.99
  -3  11  -2  143.02   20.07
  -3  11  -2  161.14   29.11
  -3  11  -2  169.45   21.92
  -3  11  -3  230.91   25.65
  -3  11  -3  255.49   34.53
  -3  11  -3  297.85   28.20
  -3  11  -4    1.98    2.15
  -3  11  -4    3.33    5.69
  -3  11  -5   56.34   13.05
  -3  11  -5   64.80   15.40
  -3  11  -6  188.87   24.33
  -3  11  -6  197.94   25.52
  -3  11  -7  615.98   43.95
  -3  11  -7  663.20   44.46
  -3  11  -8   -1.59    4.26
  -3  11  -8    9.34    4.68
  -3  11  -9   16.57    6.20
  -3  11  -9   36.70    8.34
  -3  11 -10 1107.63   44.82
  -3  11 -10 1226.29   41.48
  -3  10   8  804.23   32.07
  -3  10   8  905.85   33.09
  -3  10   7  310.66   21.96
  -3  10   7  240.20   19.76
  -3  10   6   38.75    9.60
  -3  10   6    8.61    4.20
  -3  10   5  142.84   18.79
  -3  10   5  345.35   33.12
  -3  10   4 1073.41   50.93
  -3  10   4  934.26   59.78
  -3  10   3    6.64    4.18
  -3  10   3    8.94    7.55
  -3  10   3    5.40    6.87
  -3  10   3    2.88    1.85
  -3  10   2  929.12   77.12
  -3  10   2 1070.46   64.86
  -3  10   1  439.27   54.10
  -3  10   1  769.26   53.04
  -3  10   0  163.28   20.55
  -3  10   0  131.27   38.70
  -3  10   0  161.37   31.36
  -3  10   0  186.87   24.33
  -3  10  -1  883.39   46.72
  -3  10  -1  880.24   68.14
  -3  10  -1  916.49   50.58
  -3  10  -2  473.86   34.46
  -3  10  -2  525.68   49.60
  -3  10  -2  527.54   36.22
  -3  10  -3    3.05    2.75
  -3  10  -3    0.17    2.02
  -3  10  -3    2.55    5.03
  -3  10  -3    4.09    4.70
  -3  10  -4  283.16   27.97
  -3  10  -4  284.60   32.99
  -3  10  -4  286.66   25.11
  -3  10  -5 1539.41   67.12
  -3  10  -5 1470.43   72.85
  -3  10  -6  171.49   23.42
  -3  10  -6  148.56   22.49
  -3  10  -7   10.87    6.42
  -3  10  -7   17.76    9.09
  -3  10  -7    4.30    3.99
  -3  10  -8  572.00   41.60
  -3  10  -8  457.61   39.30
  -3  10  -9  243.86   27.68
  -3  10  -9  674.66   38.70
  -3  10 -10   34.87    9.28
  -3  10 -10   52.40    9.24
  -3  10 -11    3.92    2.97
  -3  10 -11    6.01    2.74
  -3  10 -12  166.81   11.92
  -3   9  10  649.99   24.40
  -3   9   9  244.30   19.26
  -3   9   9  261.01   18.84
  -3   9   8   61.08   10.59
  -3   9   8   49.35   10.29
  -3   9   8   72.53   10.56
  -3   9   7    1.88    2.35
  -3   9   7   -3.55    4.67
  -3   9   7    1.76    1.87
  -3   9   6  147.39   20.26
  -3   9   6  237.04   24.48
  -3   9   5   44.71   10.77
  -3   9   5   57.63   11.34
  -3   9   5   55.92   14.27
  -3   9   4  714.45   42.41
  -3   9   4  808.80   50.53
  -3   9   3   50.21   15.09
  -3   9   3   34.09   14.46
  -3   9   3   31.50   11.09
  -3   9   2   15.43    9.06
  -3   9   2   37.12   11.66
  -3   9   1 1529.15   68.94
  -3   9   1 1485.43   59.74
  -3   9   0 1535.18   58.55
  -3   9   0 1442.91   87.38
  -3   9   0 1598.79   65.36
  -3   9  -1    5.68    3.03
  -3   9  -1    9.95   13.58
  -3   9  -1    5.61    3.92
  -3   9  -1    9.72    4.88
  -3   9  -2  196.24   20.76
  -3   9  -2  199.64   28.71
  -3   9  -2  200.30   20.56
  -3   9  -2  161.89   32.78
  -3   9  -3 1469.97   58.49
  -3   9  -3 1398.50   72.35
  -3   9  -3 1448.11   53.39
  -3   9  -4   95.30   14.20
  -3   9  -4   77.67   16.77
  -3   9  -4   81.28   12.50
  -3   9  -4   77.08   14.09
  -3   9  -5  187.49   21.03
  -3   9  -5  229.23   36.88
  -3   9  -5  191.27   23.13
  -3   9  -5  164.16   24.13
  -3   9  -6   31.58    9.94
  -3   9  -6   19.71    7.35
  -3   9  -6   28.72   11.54
  -3   9  -6   22.53    8.91
  -3   9  -7  583.41   45.45
  -3   9  -7  620.42   43.60
  -3   9  -7  536.42   43.35
  -3   9  -8  296.90   31.15
  -3   9  -8  316.75   32.63
  -3   9  -8  290.07   32.62
  -3   9  -9  357.76   35.93
  -3   9  -9  347.50   33.30
  -3   9 -10   13.72    7.02
  -3   9 -10   18.33    7.68
  -3   9 -10   21.14    6.14
  -3   9 -11   44.47   10.61
  -3   9 -11   48.60   10.12
  -3   9 -11   43.18    7.85
  -3   9 -12  947.47   38.19
  -3   9 -12  783.54   29.18
  -3   8  11   88.18    9.24
  -3   8  11   86.90    9.06
  -3   8  10  203.51   16.52
  -3   8   9  245.05   20.91
  -3   8   8   10.29    5.20
  -3   8   8    5.48    3.76
  -3   8   7  176.50   21.46
  -3   8   7  179.94   22.48
  -3   8   6 1815.48   77.57
  -3   8   6 1418.15   63.76
  -3   8   5  148.42   20.69
  -3   8   5  211.38   28.17
  -3   8   4   -1.38    3.08
  -3   8   4    3.79    2.43
  -3   8   3  767.61   39.78
  -3   8   3  922.92   66.31
  -3   8   3  485.21   50.84
  -3   8   3  601.33   45.20
  -3   8   2 1402.22   56.41
  -3   8   2 1281.57   48.47
  -3   8   2 1323.39   62.08
  -3   8   1  116.81   15.57
  -3   8   1  107.74   13.45
  -3   8   1  126.65   17.59
  -3   8   1   70.91   18.70
  -3   8   0   11.41    4.70
  -3   8   0    5.05    2.92
  -3   8   0    8.58    5.92
  -3   8   0   10.88    4.97
  -3   8  -1 1047.93   44.83
  -3   8  -1 1087.65   64.84
  -3   8  -1 1057.89   44.81
  -3   8  -2  296.44   20.76
  -3   8  -2  352.97   35.44
  -3   8  -2  351.39   24.76
  -3   8  -2  346.03   25.96
  -3   8  -3 1593.53   55.04
  -3   8  -3 1589.80   58.06
  -3   8  -3 1538.25   71.36
  -3   8  -3 1611.40   51.75
  -3   8  -4  280.12   24.42
  -3   8  -4  301.85   43.83
  -3   8  -4  283.10   25.77
  -3   8  -4  206.80   25.82
  -3   8  -5    5.41    4.12
  -3   8  -5    7.20    4.24
  -3   8  -5    8.39    5.28
  -3   8  -5    0.72    2.00
  -3   8  -6  859.00   52.09
  -3   8  -6  917.79   52.70
  -3   8  -7 1219.63   66.48
  -3   8  -7 1148.93   64.79
  -3   8  -8  280.47   33.59
  -3   8  -8  266.42   30.78
  -3   8  -8  273.48   32.87
  -3   8  -9    6.51    3.70
  -3   8  -9   16.41    8.40
  -3   8 -10  500.54   42.35
  -3   8 -10  534.01   44.50
  -3   8 -10  588.67   34.57
  -3   8 -11  544.19   39.19
  -3   8 -11  591.11   40.87
  -3   8 -11  448.32   27.12
  -3   8 -12  127.86   15.80
  -3   8 -12  120.94   15.14
  -3   8 -12   90.29   10.55
  -3   8 -13   24.77    5.48
  -3   8 -13   32.88    5.98
  -3   8 -13   20.49    4.08
  -3   7  12  607.85   22.54
  -3   7  12  565.41   22.65
  -3   7  11  683.52   29.54
  -3   7  11  723.18   29.57
  -3   7  10  106.89   12.93
  -3   7  10   90.56   12.14
  -3   7   9  130.65   15.85
  -3   7   9  145.62   16.96
  -3   7   9  137.87   16.80
  -3   7   8 1569.99   63.00
  -3   7   8 1437.14   58.90
  -3   7   7  535.68   40.63
  -3   7   7  521.32   37.63
  -3   7   6  122.95   20.32
  -3   7   6  135.92   20.60
  -3   7   5   35.09   10.59
  -3   7   5   39.07   10.04
  -3   7   5   14.50    7.47
  -3   7   4  641.19   36.68
  -3   7   4  589.16   45.09
  -3   7   3  393.69   27.55
  -3   7   2  946.83   39.76
  -3   7   1   28.67    6.46
  -3   7   0   33.81    6.93
  -3   7  -1 3556.58   66.23
  -3   7  -1 3656.33   71.93
  -3   7  -2 1178.21   39.92
   3  -7   2 1077.26   92.38
  -3   7  -3  146.63   15.02
   3  -7   3  247.90   44.38
  -3   7  -4  376.75   26.36
   3  -7   4  684.32   68.34
  -3   7  -5 2541.97   83.62
  -3   7  -5 2729.89  116.20
  -3   7  -6   55.77   13.08
  -3   7  -6   62.15   14.80
  -3   7  -6   71.28   16.99
  -3   7  -6   44.49   11.53
  -3   7  -7  427.42   40.17
  -3   7  -7  543.11   43.15
  -3   7  -7  547.48   48.54
  -3   7  -8  463.12   44.10
  -3   7  -8  562.91   52.27
  -3   7  -9   10.80    5.15
  -3   7  -9    4.29    3.49
  -3   7  -9   11.05    4.54
  -3   7 -10  571.71   47.11
  -3   7 -10  676.68   55.14
  -3   7 -10  605.34   35.56
  -3   7 -11  692.08   46.32
  -3   7 -11  815.21   53.26
  -3   7 -12    4.70    2.55
  -3   7 -12    0.90    1.28
  -3   7 -12    3.84    3.36
  -3   7 -13  147.54   14.45
  -3   7 -13  157.19   15.28
  -3   7 -13  122.31   10.89
  -3   6  13  526.60   20.95
  -3   6  13  517.92   20.61
  -3   6  12    9.57    3.27
  -3   6  12   14.42    3.96
  -3   6  11    0.76    0.53
  -3   6  11    5.92    3.12
  -3   6  10  551.28   31.47
  -3   6  10  479.28   30.06
  -3   6   9  125.91   16.53
  -3   6   9  111.57   15.33
  -3   6   9  121.40   16.65
  -3   6   8  925.49   48.27
  -3   6   8  942.96   50.64
  -3   6   8  938.66   47.10
  -3   6   7  508.60   37.59
  -3   6   7  398.99   35.36
  -3   6   6   48.01   12.23
  -3   6   6   22.42    8.94
  -3   6   5  406.27   30.45
  -3   6   4 2196.36   63.92
  -3   6   3  155.85   15.60
  -3   6   2   78.01   10.29
  -3   6   1 1066.49   36.30
  -3   6   0 1534.92   40.71
  -3   6   0 1601.98   43.84
  -3   6  -1   28.31    5.55
  -3   6  -1   33.16    6.28
  -3   6  -2  411.15   22.60
  -3   6  -3  546.35   28.25
   3  -6   3 1065.42   88.25
  -3   6  -4   55.25    9.89
   3  -6   4   94.86   22.88
  -3   6  -5 1906.37   64.49
   3  -6   5 2585.98  106.87
  -3   6  -6   80.14   16.00
  -3   6  -6   83.78   17.54
  -3   6  -6   70.21   15.86
  -3   6  -6   46.92   11.79
  -3   6  -7   11.64    6.69
  -3   6  -7   13.89    6.38
  -3   6  -7   12.03    5.94
  -3   6  -7    8.59    4.59
  -3   6  -8  787.60   57.80
  -3   6  -8 1115.46   79.92
  -3   6  -9 1161.08   70.85
  -3   6  -9 1358.48   88.56
  -3   6 -10   21.86   10.15
  -3   6 -10   11.41    4.86
  -3   6 -11   43.98   11.91
  -3   6 -11   67.20   17.30
  -3   6 -11   32.91    7.43
  -3   6 -12 1060.10   50.48
  -3   6 -12 1309.83   62.87
  -3   6 -13  175.07   16.49
  -3   6 -13  150.46   12.43
  -3   5  14   41.20    5.52
  -3   5  14   42.24    5.45
  -3   5  13  775.04   28.93
  -3   5  13  777.97   28.60
  -3   5  12    5.22    3.26
  -3   5  12    7.19    3.13
  -3   5  11  171.32   17.27
  -3   5  11  181.67   17.66
  -3   5  10  934.22   43.06
  -3   5  10  995.87   44.53
  -3   5  10 1033.68   45.19
  -3   5   9 1283.44   53.87
  -3   5   9 1386.35   55.84
  -3   5   9 1329.44   56.37
  -3   5   8   13.10    5.46
  -3   5   8   10.25    5.65
  -3   5   8    8.04    3.70
  -3   5   8   11.55    6.16
  -3   5   7  334.43   30.60
  -3   5   7  273.67   28.94
  -3   5   7  234.74   27.59
  -3   5   6 1381.40   57.56
  -3   5   5  212.97   20.01
  -3   5   4  383.12   24.07
  -3   5   3   27.65    5.79
  -3   5   2   80.61    9.36
  -3   5   1  783.55   28.32
   3  -5  -1  747.96   26.03
  -3   5   0 1717.50   40.81
   3  -5   0 1876.36   50.41
  -3   5   0 1854.10   43.25
  -3   5  -1    3.06    1.60
  -3   5  -1    4.88    2.09
  -3   5  -2  476.44   23.31
  -3   5  -3 2273.34   55.78
  -3   5  -4  499.52   28.94
  -3   5  -5  109.64   15.17
  -3   5  -6  231.58   24.47
   3  -5   6  345.28   32.05
  -3   5  -7 1366.35   71.31
  -3   5  -7 2259.35   80.91
  -3   5  -8    5.61    3.00
  -3   5  -8   25.94    7.96
  -3   5  -9  131.87   23.52
  -3   5  -9  151.85   18.43
  -3   5 -10  114.72   20.82
  -3   5 -10   88.57   13.46
  -3   5 -11   29.51   10.05
  -3   5 -11   49.91   15.31
  -3   5 -11   23.39    6.30
  -3   5 -12  769.94   42.93
  -3   5 -12  580.99   28.71
  -3   5 -13  240.88   19.80
  -3   5 -13  197.54   14.23
  -3   5 -14    0.10    1.06
  -3   5 -14    1.26    1.50
  -3   4  14  371.21   19.11
  -3   4  14  365.04   18.18
  -3   4  13  130.57   12.95
  -3   4  13  126.85   12.53
  -3   4  12  146.40   15.42
  -3   4  12  148.24   15.12
  -3   4  11 2768.45   71.27
  -3   4  11 2897.21   74.81
  -3   4  10    1.99    2.91
  -3   4  10    1.44    0.67
  -3   4   9  204.22   22.79
  -3   4   9  213.73   22.09
  -3   4   9  211.07   23.97
  -3   4   9  207.22   22.67
  -3   4   8  918.56   48.23
  -3   4   8 1022.09   52.19
  -3   4   8  924.20   52.15
  -3   4   7    0.75    2.44
   3  -4  -7    3.85    3.19
  -3   4   6 1331.63   51.61
   3  -4  -6  629.96   38.24
  -3   4   5  580.82   29.86
   3  -4  -5  350.25   26.82
  -3   4   4   10.36    3.87
   3  -4  -4    8.83    4.05
  -3   4   3 1404.23   37.51
   3  -4  -3 1412.32   39.27
  -3   4   2 2837.81   50.21
   3  -4  -2 2791.95   47.14
   3  -4  -2 2863.63   43.69
  -3   4   1  227.49   13.83
   3  -4  -1  234.06   14.36
   3  -4  -1  220.50   11.74
  -3   4   1  273.71   18.88
  -3   4   1  231.26   13.94
  -3   4   0    8.13    2.62
  -3   4   0    7.81    2.61
   3  -4   0    9.54    3.58
  -3   4   0    9.98    4.16
   3  -4   1 2782.53   70.27
  -3   4  -1 2838.73   68.42
  -3   4  -1 2781.32   49.24
  -3   4  -2  814.03   29.41
  -3   4  -2  816.82   40.40
  -3   4  -3   29.40    6.22
  -3   4  -3   27.76    7.59
  -3   4  -4   42.55    8.27
  -3   4  -5  534.75   32.67
   3  -4   6  182.36   22.47
  -3   4  -6   64.41   12.69
  -3   4  -7  952.88   57.78
  -3   4  -7 2120.31   76.62
   3  -4   7 2285.77   74.77
  -3   4  -8  134.50   22.36
  -3   4  -8  277.73   26.19
  -3   4  -9   27.04    9.38
  -3   4  -9   29.76    7.98
  -3   4  -9   31.87    8.53
  -3   4 -10 1737.17   76.80
  -3   4 -10 1763.75   63.11
  -3   4 -11  575.57   40.66
  -3   4 -11  448.32   27.70
  -3   4 -11  530.48   32.43
  -3   4 -12    6.59    3.88
  -3   4 -12   17.25    8.06
  -3   4 -12    4.45    2.56
  -3   4 -12    8.60    3.76
  -3   4 -13  295.36   21.48
  -3   4 -13  273.44   17.99
  -3   4 -14  754.16   26.76
  -3   4 -14  912.21   32.27
  -3   3  15   15.60    3.29
  -3   3  15   14.56    3.49
  -3   3  14   67.03    8.86
  -3   3  14   61.99    8.08
  -3   3  13  105.23   12.14
  -3   3  13  111.99   13.17
  -3   3  12  434.98   28.64
  -3   3  12  424.71   28.10
  -3   3  12  439.07   27.43
  -3   3  11  469.68   30.17
  -3   3  11  500.32   32.90
  -3   3  11  452.58   31.10
  -3   3  10   25.82    7.70
  -3   3  10   30.94    8.95
  -3   3  10   28.94    8.35
  -3   3   9    1.73    1.86
  -3   3   9    6.06    3.80
  -3   3   9    5.13    4.90
  -3   3   8 1123.00   55.33
   3  -3  -8 1615.51   61.11
  -3   3   7  722.56   40.06
   3  -3  -7  365.34   29.61
  -3   3   6   34.27    7.57
   3  -3  -6   34.09    7.92
  -3   3   5  373.01   22.07
   3  -3  -5  341.16   21.58
  -3   3   4 2337.32   47.88
   3  -3  -4 2182.90   46.58
   3  -3  -3  165.17   11.28
  -3   3   3  186.84   12.21
  -3   3   3  176.69   11.96
   3  -3  -3  176.09   10.03
   3  -3  -2  196.57   11.72
  -3   3   2  217.85   13.16
  -3   3   2  206.85   12.20
  -3   3   1  239.70   13.51
   3  -3  -1  270.60   15.53
  -3   3   1  270.67   14.71
  -3   3   1  270.67   13.60
   3  -3   0 1526.84   42.82
  -3   3   0 1529.00   36.13
   3  -3   0 1465.51   24.59
  -3   3   0 1507.67   32.45
  -3   3  -1 1097.48   30.50
  -3   3  -1 1140.70   33.18
   3  -3   1 1155.58   23.73
   3  -3   1 1162.60   44.07
  -3   3  -2  735.34   26.97
  -3   3  -2  661.07   27.47
   3  -3   2  721.57   21.45
  -3   3  -3   30.87    6.14
   3  -3   3   25.41    4.72
  -3   3  -3   20.19    5.39
   3  -3   4  889.84   32.56
  -3   3  -4  885.03   36.70
   3  -3   4  787.53   47.47
  -3   3  -5  668.29   35.94
   3  -3   5  701.31   33.53
  -3   3  -6  135.51   18.01
   3  -3   6  124.26   15.67
  -3   3  -7   56.29   13.45
  -3   3  -7   52.52   12.05
   3  -3   7  237.12   23.26
   3  -3   7   49.79   10.63
  -3   3  -7  226.87   24.60
  -3   3  -8 1022.59   50.16
  -3   3  -8  971.31   51.74
  -3   3  -9 2142.92   85.74
  -3   3  -9 2030.86   66.51
  -3   3  -9 2222.46   76.18
  -3   3 -10    1.15    2.25
  -3   3 -10    0.86    1.16
  -3   3 -10    5.41    4.52
  -3   3 -11   50.72   11.49
  -3   3 -11   47.85    9.08
  -3   3 -11   56.74   10.88
  -3   3 -12  428.44   29.39
  -3   3 -12  353.75   21.21
  -3   3 -12  408.80   25.69
  -3   3 -13    4.43    2.99
  -3   3 -13    7.03    4.27
  -3   3 -13    6.38    2.88
  -3   2  15    5.85    2.19
  -3   2  15    2.21    1.25
  -3   2  14  326.65   19.79
  -3   2  14  322.86   21.16
  -3   2  13 1043.63   43.02
  -3   2  13  916.57   38.79
  -3   2  13 1029.54   40.14
  -3   2  12  299.68   23.56
  -3   2  12  325.57   26.08
  -3   2  12  287.06   23.48
  -3   2  11   29.68    7.91
  -3   2  11   28.41    9.01
  -3   2  11   34.61    8.54
  -3   2  10 2849.56   87.35
  -3   2  10 2659.34   76.73
  -3   2  10 2654.41   78.73
  -3   2   9  765.77   46.91
   3  -2  -9  999.97   49.28
  -3   2   9 2093.25   77.79
  -3   2   9 2269.17   75.60
  -3   2   9 2108.16   70.92
  -3   2   8   19.47    6.11
   3  -2  -8   25.71    8.08
  -3   2   7   36.11    8.33
   3  -2  -7   42.09    9.38
  -3   2   6 1033.37   38.83
   3  -2  -6 1003.68   38.01
  -3   2   5    7.68    2.86
   3  -2  -5    4.28    2.05
  -3   2   5    7.15    2.53
  -3   2   4 1422.32   33.95
  -3   2   4 1495.49   35.48
   3  -2  -4 1421.85   34.19
   3  -2  -4 1406.77   29.98
   3  -2  -4 1522.72   29.87
  -3   2   3   62.95    6.40
  -3   2   3   64.50    6.98
   3  -2  -3   65.33    5.77
   3  -2  -3   60.26    6.09
   3  -2  -2   15.71    3.32
  -3   2   2   11.44    2.56
   3  -2  -2   13.07    2.57
  -3   2   2   13.93    3.17
  -3   2   1 3522.11   49.93
   3  -2  -1 3523.73   40.92
  -3   2   1 3607.62   44.66
  -3   2   0 5784.07   64.66
  -3   2   0 6101.60   67.17
   3  -2   0 6055.22   56.12
   3  -2   0 6537.48   89.27
  -3   2   0 6244.63   58.30
  -3   2  -1   29.58    4.83
   3  -2   1   30.86    7.24
  -3   2  -1   31.67    4.97
   3  -2   1   29.73    4.30
  -3   2  -2  226.88   14.53
  -3   2  -2  216.17   14.07
   3  -2   2  222.12   13.02
  -3   2  -3 2254.66   51.34
   3  -2   3 2232.59   47.86
  -3   2  -4 1451.58   46.09
   3  -2   4 1452.23   44.54
  -3   2  -4 1304.21   43.27
   3  -2   4 1441.98   62.95
  -3   2  -5  141.22   16.16
   3  -2   5  140.34   15.86
  -3   2  -5  124.29   14.75
  -3   2  -6   29.62    8.35
   3  -2   6   21.05    6.53
  -3   2  -7  257.84   28.88
  -3   2  -7  482.28   35.80
   3  -2   7  458.45   32.14
   3  -2   7  140.37   18.83
  -3   2  -8  190.75   25.09
  -3   2  -8  211.64   22.85
  -3   2  -8  193.53   23.78
  -3   2  -9 1558.94   70.22
  -3   2  -9 1387.61   54.98
  -3   2  -9 1511.53   64.56
  -3   2 -10    6.41    4.29
  -3   2 -10    5.53    3.40
  -3   2 -10    8.31    4.88
  -3   2 -11    9.49    4.92
  -3   2 -11    6.02    3.42
  -3   2 -11    9.04    4.26
  -3   2 -12  855.17   39.11
  -3   2 -12  816.12   36.82
  -3   2 -13  670.44   29.15
  -3   2 -13  629.51   27.11
  -3   1  16  198.65   12.09
  -3   1  15 1177.21   36.86
  -3   1  14  198.55   16.16
  -3   1  14  209.45   18.15
  -3   1  14  184.55   16.05
  -3   1  13   73.91   11.12
  -3   1  13   89.36   13.34
  -3   1  13   72.05   10.87
  -3   1  12  204.68   20.10
  -3   1  12  221.55   22.82
  -3   1  12  180.02   18.78
  -3   1  12  183.07   19.03
  -3   1  11  658.29   42.85
  -3   1  11  611.08   36.59
  -3   1  11  585.75   35.56
  -3   1  10  487.86   38.87
  -3   1  10  520.61   34.85
  -3   1  10  489.26   33.61
   3  -1  -9  333.43   29.72
   3  -1  -8  199.47   21.41
  -3   1   7   53.54    8.86
   3  -1  -7   66.88   10.51
  -3   1   6 3076.64   63.26
  -3   1   6 3060.07   62.20
   3  -1  -6 3131.55   60.90
   3  -1  -6 2887.13   55.84
  -3   1   5 1419.05   35.93
  -3   1   5 1540.42   39.86
   3  -1  -5 1507.96   38.00
   3  -1  -5 1541.40   32.74
   3  -1  -5 1487.92   34.46
  -3   1   4   19.49    3.56
   3  -1  -4   16.05    3.28
  -3   1   4   14.68    3.53
   3  -1  -4   14.22    3.01
  -3   1   3 2593.31   44.13
  -3   1   3 2478.93   35.33
   3  -1  -3 2573.82   42.77
  -3   1   2 5887.40   63.99
   3  -1  -2 5940.97   68.91
  -3   1   2 5998.48   51.29
  -3   1   1    3.64    1.77
   3  -1  -1    1.71    0.95
   3  -1  -1    1.51    0.89
  -3   1   1    1.10    0.47
  -3   1   0   50.37    5.81
  -3   1   0   52.35    6.11
   3  -1   0   55.94    5.86
   3  -1   0   56.50    8.38
  -3   1  -1 1258.21   30.59
  -3   1  -1 1290.95   31.08
   3  -1   1 1288.96   30.46
   3  -1   1 1342.14   46.98
  -3   1  -2  260.19   14.76
  -3   1  -2  267.19   15.39
   3  -1   2  266.59   15.56
  -3   1  -3 1232.61   36.93
  -3   1  -3 1193.18   34.32
   3  -1   3 1255.47   38.89
  -3   1  -4  458.72   25.26
   3  -1   4  479.63   34.89
  -3   1  -4  471.60   24.77
   3  -1   4  490.72   27.77
   3  -1   5   79.87   12.60
  -3   1  -5  107.82   13.50
   3  -1   6   60.24   11.73
   3  -1   6  356.77   28.00
  -3   1  -7 2318.16   85.50
  -3   1  -7 1853.26   76.82
  -3   1  -8  537.08   40.49
  -3   1  -8  502.31   35.09
  -3   1  -8  484.69   39.39
  -3   1  -9  164.70   21.73
  -3   1  -9  140.44   17.45
  -3   1  -9  162.57   22.03
  -3   1 -10  908.67   47.55
  -3   1 -10  877.92   47.63
  -3   1 -11  512.08   32.20
  -3   1 -11  500.72   32.47
  -3   1 -12    7.55    3.53
  -3   1 -12    6.79    3.55
  -3   1 -13   91.24    9.66
  -3   1 -13  115.41   11.58
  -3   1 -13   92.84    9.98
  -3   0  16   56.43    6.66
  -3   0  15  806.46   31.62
  -3   0  15  715.74   28.42
  -3   0  14   90.66   12.50
  -3   0  14   93.87   11.55
  -3   0  14   84.45   11.25
  -3   0  13   24.77    6.98
  -3   0  13   27.63    6.98
  -3   0  13   23.79    7.00
  -3   0  13   23.00    6.01
  -3   0  12  609.16   35.00
  -3   0  12  609.33   36.17
  -3   0  12  617.05   36.70
  -3   0  11 1738.27   75.59
  -3   0  11 1594.65   60.97
  -3   0  11 1654.43   60.85
  -3   0  10  309.83   33.27
  -3   0  10  389.38   30.98
   3   0  -9  533.45   37.86
   3   0  -8 1007.10   45.67
   3   0  -7 1697.11   50.76
   3   0  -6   95.27   10.58
   3   0  -6   99.20   10.18
   3   0  -6   94.91    9.18
  -3   0   5    1.29    0.99
   3   0  -5    2.76    1.61
   3   0  -5    2.78    1.90
   3   0  -5    4.22    2.23
  -3   0   5    3.19    1.78
   3   0  -4 1248.18   31.63
  -3   0   4 1234.19   33.60
   3   0  -4 1277.14   30.65
  -3   0   4 1171.74   24.26
  -3   0   3  256.42   14.26
   3   0  -3  285.72   13.83
   3   0  -3  254.94   14.67
  -3   0   2 3065.40   47.21
   3   0  -2 3149.20   45.64
   3   0  -2 3181.84   54.64
   3   0  -1    8.55    3.14
  -3   0   1    5.53    2.01
   3   0  -1    8.71    2.44
   3   0   0    0.99    1.18
   3   0   0    2.28    1.35
  -3   0  -1 2228.85   39.74
   3   0   1 2172.24   61.83
  -3   0  -1 2240.22   41.76
   3   0   1 2175.43   43.38
  -3   0  -2 1897.93   39.36
  -3   0  -2 1904.77   40.22
   3   0   2 1894.13   45.07
   3   0   3    3.07    1.61
  -3   0  -3    2.63    2.35
   3   0   3    3.58    2.41
  -3   0  -4  146.70   13.68
   3   0   4  134.36   15.59
   3   0   4  168.12   20.36
  -3   0  -5 1791.07   55.72
   3   0   5 1280.06   54.19
   3   0   6   26.36    8.12
  -3   0  -7  142.76   20.38
  -3   0  -7  105.24   16.70
  -3   0  -7   81.54   17.02
  -3   0  -8  178.02   22.33
  -3   0  -8  144.52   18.42
  -3   0  -8  143.67   21.71
  -3   0  -9   48.90   11.21
  -3   0  -9   48.14    9.68
  -3   0  -9   52.92   12.84
  -3   0 -10   89.96   14.16
  -3   0 -10   92.17   15.42
  -3   0 -11  238.79   20.44
  -3   0 -11  231.51   21.91
  -3   0 -12   10.56    3.82
  -3   0 -12    8.12    3.54
  -3   0 -13   76.34    8.39
  -3  -1  16  677.02   23.15
  -3  -1  15   16.84    4.63
  -3  -1  15   16.36    4.27
  -3  -1  14  201.51   19.23
   3   1 -14  178.01   16.12
  -3  -1  14  162.41   15.99
   3   1 -13 1456.32   51.96
  -3  -1  13 1355.64   50.57
  -3  -1  13 1460.11   55.53
  -3  -1  12  216.92   26.21
   3   1 -12  196.78   20.52
  -3  -1  12  195.36   20.44
  -3  -1  12  186.15   21.14
  -3  -1  11   35.28   11.85
   3   1 -11   37.30    9.28
  -3  -1  11   45.80   11.18
  -3  -1  11   43.96   10.13
  -3  -1  10  338.70   36.46
  -3  -1  10  382.11   31.88
   3   1  -9  139.39   19.24
   3   1  -8  684.84   36.80
  -3  -1   8  648.82   40.15
   3   1  -7  488.32   23.82
   3   1  -7  534.78   26.98
   3   1  -7  556.24   27.55
   3   1  -6  114.76   11.36
   3   1  -6  120.16   11.66
   3   1  -6  109.97   10.84
  -3  -1   6   94.04   14.29
  -3  -1   5   78.49    9.48
   3   1  -5   76.70    8.77
   3   1  -5   81.19    8.73
  -3  -1   5   81.80   12.45
  -3  -1   4 2776.96   51.92
   3   1  -4 2877.54   53.22
   3   1  -4 2898.99   49.40
  -3  -1   4 2889.97   67.18
  -3  -1   3 1217.84   32.07
   3   1  -3 1287.82   36.56
   3   1  -3 1218.24   30.78
  -3  -1   2   14.73    3.32
   3   1  -2   12.22    3.97
   3   1  -2   10.47    2.33
   3   1  -2   11.10    2.81
   3   1  -1 1690.84   28.92
  -3  -1   1 1787.41   36.67
   3   1  -1 1763.63   37.64
   3   1   0 1444.57   28.49
  -3  -1   0 1531.38   34.39
   3   1   0 1476.50   36.17
   3   1   1   -0.26    0.62
   3   1   1    1.61    1.32
  -3  -1  -1   -1.11    4.21
  -3  -1  -1    1.92    1.49
   3   1   1    5.18    2.22
   3   1   2   26.09    7.71
  -3  -1  -2   49.03    6.69
  -3  -1  -2   40.29   10.00
   3   1   2   56.67    8.58
  -3  -1  -3  492.43   22.98
   3   1   3  485.13   28.23
  -3  -1  -3  520.37   34.24
  -3  -1  -4   19.30    6.85
   3   1   4   17.50    6.64
  -3  -1  -4   17.48    4.77
   3   1   4   14.24    5.46
   3   1   5  820.42   46.01
   3   1   6   23.84    8.03
  -3  -1  -6   36.60   11.46
   3   1   7  317.49   30.91
  -3  -1  -7  365.97   36.56
  -3  -1  -8 2317.37   79.33
  -3  -1  -8 2169.97   87.22
  -3  -1  -9 1777.58   63.66
  -3  -1  -9 1691.78   72.89
  -3  -1 -10   22.49    6.72
  -3  -1 -10   21.84    7.59
  -3  -1 -11   52.35    8.55
  -3  -1 -11   50.72    9.72
  -3  -1 -12  530.55   22.23
  -3  -1 -12  507.81   25.04
   3   2 -16    1.50    0.78
  -3  -2  15  634.05   27.97
   3   2 -15  551.03   26.30
  -3  -2  15  575.14   26.90
  -3  -2  14    8.25    4.11
  -3  -2  14    5.56    3.53
   3   2 -14    8.26    3.94
  -3  -2  14    5.18    2.78
   3   2 -13  720.68   39.44
  -3  -2  13  682.56   37.16
  -3  -2  13  763.04   41.65
  -3  -2  12   40.07   11.12
  -3  -2  12   30.32   11.01
   3   2 -12   31.52    9.17
  -3  -2  12   35.60    9.13
  -3  -2  11   29.16    9.34
  -3  -2  11   26.35   11.09
  -3  -2  11   45.80   11.30
  -3  -2  10 1040.08   54.40
  -3  -2  10  660.40   42.99
   3   2  -9 1293.68   56.36
   3   2  -8   53.92   10.00
   3   2  -8   52.84    9.66
  -3  -2   8   46.92   11.93
   3   2  -7   19.76    5.32
   3   2  -7   12.52    4.32
  -3  -2   7    5.65    3.93
   3   2  -6 1054.95   36.69
  -3  -2   6 1024.45   32.54
   3   2  -6 1138.88   36.44
   3   2  -6 1199.26   37.83
  -3  -2   6  955.09   47.71
  -3  -2   5  473.38   19.88
  -3  -2   5  505.14   24.84
   3   2  -5  578.28   24.44
   3   2  -5  511.49   25.08
  -3  -2   5  501.25   31.51
   3   2  -4  144.37   13.37
  -3  -2   4  135.82   11.88
   3   2  -4  140.25   11.47
  -3  -2   4  139.59   15.15
   3   2  -3   10.29    3.94
  -3  -2   3    9.36    3.01
   3   2  -3    9.94    3.08
  -3  -2   2  607.58   22.64
   3   2  -2  618.08   23.41
   3   2  -2  590.88   19.70
  -3  -2   1  526.47   20.83
   3   2  -1  505.92   21.76
   3   2  -1  571.42   30.90
   3   2  -1  504.51   18.55
  -3  -2   0 1119.87   43.41
  -3  -2   0 1181.93   31.47
   3   2   0 1218.32   49.40
   3   2   0 1075.52   33.66
   3   2   0 1085.46   29.05
   3   2   1   15.62    3.87
  -3  -2  -1   11.20    5.44
   3   2   1   13.38    5.58
  -3  -2  -1   19.30    4.27
   3   2   1   13.38    4.10
  -3  -2  -2    3.37    2.42
   3   2   2   11.05    3.91
   3   2   2    6.06    3.63
  -3  -2  -2   11.33    3.33
   3   2   2    7.95    3.69
  -3  -2  -3 1871.17   46.13
   3   2   3 1819.97   59.53
   3   2   3 1750.33   68.09
   3   2   3 1846.14   53.91
  -3  -2  -4  592.03   35.55
   3   2   4  606.78   38.52
  -3  -2  -5    2.17    1.94
   3   2   5    0.79    1.91
  -3  -2  -5    0.13    1.12
  -3  -2  -6  430.00   35.41
   3   2   6  136.69   21.50
  -3  -2  -6  435.10   32.25
  -3  -2  -6  139.21   23.68
   3   2   7  680.99   47.32
  -3  -2  -7  743.58   54.13
  -3  -2  -8   80.89   10.69
   3   2   8   86.46   15.49
  -3  -2  -8  111.35   20.02
  -3  -2  -9  166.61   22.81
  -3  -2 -10  158.89   18.91
  -3  -2 -11  210.32   17.67
   3   3 -16   11.90    3.04
   3   3 -15 1157.95   39.74
  -3  -3  15 1132.10   37.41
   3   3 -14  414.62   28.23
  -3  -3  14  401.88   25.88
  -3  -3  14  442.03   28.89
  -3  -3  13   21.79    6.94
  -3  -3  13   24.61    9.04
   3   3 -13   21.36    7.21
  -3  -3  13   24.91    7.59
  -3  -3  12  516.17   38.78
  -3  -3  12  539.65   36.81
  -3  -3  11  719.74   54.30
  -3  -3  11  619.49   43.83
  -3  -3  10   29.73    8.89
  -3  -3  10   18.56    7.43
   3   3  -9  134.22   18.09
  -3  -3   9   79.20   15.55
  -3  -3   9  141.26   21.60
  -3  -3   9  151.69   18.46
   3   3  -8  514.09   29.67
   3   3  -8  567.40   32.67
   3   3  -7  270.57   19.37
   3   3  -7  301.69   21.44
  -3  -3   7  271.25   19.21
   3   3  -6 1102.51   41.57
   3   3  -6 1096.20   36.88
  -3  -3   6 1057.00   35.02
  -3  -3   6 1000.55   52.20
  -3  -3   5   78.29   10.15
   3   3  -5   95.58   10.47
   3   3  -5   90.27   12.07
  -3  -3   5   87.99   14.12
   3   3  -4   11.74    4.47
  -3  -3   4    7.73    3.05
   3   3  -4    8.89    3.07
  -3  -3   4   11.07    4.77
  -3  -3   3 1687.75   40.88
   3   3  -3 1629.14   40.30
   3   3  -3 1649.21   37.64
  -3  -3   3 1730.03   50.90
  -3  -3   2 3246.76   54.69
   3   3  -2 3130.11   56.74
   3   3  -2 3186.93   52.26
   3   3  -1  611.56   23.59
  -3  -3   1  636.71   23.92
   3   3  -1  603.27   25.71
  -3  -3   1  643.07   28.06
  -3  -3   0    2.44    2.26
   3   3   0    2.56    2.90
  -3  -3   0    5.09    2.09
   3   3   0    4.56    2.63
   3   3   0    3.54    1.69
  -3  -3  -1  894.78   29.60
   3   3   1  848.16   35.62
   3   3   1  838.52   32.45
  -3  -3  -2 1125.73   51.98
   3   3   2 1848.07   58.04
   3   3   2 1377.40   65.17
   3   3   2 1869.01   54.14
  -3  -3  -3   16.53    6.35
   3   3   3   42.22    9.32
   3   3   3   30.30    8.23
   3   3   4    0.52    0.85
  -3  -3  -4    0.46    2.10
   3   3   5   71.90   16.08
  -3  -3  -5  157.17   25.85
   3   3   6   -0.59    4.45
  -3  -3  -6    9.20    4.69
  -3  -3  -6    6.00    6.20
  -3  -3  -7  708.70   38.22
  -3  -3  -7  639.69   50.54
  -3  -3  -8   64.69    9.21
  -3  -3  -8   74.80   10.93
  -3  -3  -8   90.31   18.15
  -3  -3  -9   51.44   11.57
  -3  -3 -10  590.84   31.30
  -3  -3 -11  923.59   30.34
   3   4 -16  453.13   19.92
   3   4 -15   55.04    8.84
  -3  -4  15   44.35    7.15
  -3  -4  15   54.44    8.29
  -3  -4  14    9.57    4.56
   3   4 -14    3.60    2.43
  -3  -4  14    7.03    2.74
   3   4 -13  453.87   34.74
  -3  -4  13  447.13   31.66
  -3  -4  13  504.75   35.64
  -3  -4  12    4.15    1.26
  -3  -4  12    3.49    2.78
  -3  -4  11  683.03   51.72
  -3  -4  11  666.71   44.87
  -3  -4  11  660.69   45.21
  -3  -4  10   10.88    5.65
  -3  -4  10    1.97    0.61
  -3  -4   9  138.57   21.11
  -3  -4   9  194.39   21.48
  -3  -4   8 1473.39   65.55
  -3  -4   8 1724.31   58.07
   3   4  -7 2694.02   66.27
  -3  -4   7 2340.36   61.00
   3   4  -6    7.10    3.70
   3   4  -6    2.18    2.48
  -3  -4   6    3.64    2.64
  -3  -4   6    3.05    2.00
  -3  -4   6    4.10    4.48
   3   4  -5   63.61   11.81
  -3  -4   5   66.53    9.59
   3   4  -5   67.02    9.43
  -3  -4   5   67.16   12.49
  -3  -4   4 2792.37   57.98
   3   4  -4 2676.20   56.57
   3   4  -4 2921.11   81.64
  -3  -4   4 2847.59   73.04
  -3  -4   3  316.37   18.48
   3   4  -3  297.58   18.61
   3   4  -3  303.81   18.24
  -3  -4   3  323.45   22.80
  -3  -4   2  131.71   11.49
   3   4  -2  125.10   12.22
   3   4  -2  154.34   21.01
   3   4  -2  118.10   11.52
   3   4  -1  170.46   23.95
  -3  -4   1  175.09   13.11
   3   4  -1  160.35   14.47
  -3  -4   1  162.10   15.77
   3   4  -1  163.13   13.91
   3   4   0  839.57   35.25
   3   4   0  835.40   33.66
  -3  -4   0  820.38   38.66
   3   4   1   23.88   10.16
  -3  -4  -1   45.70    9.98
   3   4   1   57.72   10.10
   3   4   1   43.12    8.31
  -3  -4  -2  483.57   35.78
  -3  -4  -2  398.00   32.39
  -3  -4  -2  840.62   48.49
   3   4   2  758.17   40.52
   3   4   2  732.00   38.30
   3   4   2  550.77   39.30
  -3  -4  -3    1.19    2.58
  -3  -4  -3    7.96    5.54
   3   4   3    5.17    4.63
  -3  -4  -4   51.90   12.46
  -3  -4  -4   81.22   19.03
  -3  -4  -5 1496.57   64.60
   3   4   5 1096.99   57.39
  -3  -4  -6  761.12   42.89
   3   4   6  716.53   42.21
  -3  -4  -7   35.17    8.24
  -3  -4  -7   42.92   12.73
  -3  -4  -8  349.85   22.14
  -3  -4  -8  366.78   31.30
  -3  -4  -9  504.02   21.26
  -3  -4  -9  580.02   31.92
  -3  -4 -10   15.12    4.31
   3   5 -16  143.87   10.58
   3   5 -15   55.95    8.56
  -3  -5  15   46.71    6.83
  -3  -5  15   61.59    7.94
  -3  -5  14  137.60   15.04
   3   5 -14  123.96   15.68
  -3  -5  14  117.52   13.82
  -3  -5  13 1034.76   47.38
   3   5 -13 1053.47   52.14
  -3  -5  13 1170.40   52.55
  -3  -5  12  151.11   20.67
  -3  -5  12  117.83   18.52
  -3  -5  11  133.11   19.71
  -3  -5  11   87.78   16.56
  -3  -5  10  525.85   41.30
  -3  -5  10  827.49   46.86
  -3  -5   9 1403.43   66.59
  -3  -5   9 1837.03   64.68
  -3  -5   8   10.85    4.90
  -3  -5   8    9.84    6.10
  -3  -5   7   63.29   10.69
  -3  -5   7   60.13   12.99
  -3  -5   6 1497.92   48.32
   3   5  -6 1437.66   47.82
  -3  -5   6 1561.11   63.89
  -3  -5   5  179.03   16.21
   3   5  -5  171.45   15.71
  -3  -5   5  183.15   21.57
  -3  -5   4  826.69   32.46
   3   5  -4  809.63   33.26
  -3  -5   4  878.21   42.56
  -3  -5   3  488.61   23.58
   3   5  -3  467.82   25.34
   3   5  -3  432.41   24.20
   3   5  -2   13.92    8.35
   3   5  -2    1.82    0.36
   3   5  -2    8.32    3.21
   3   5  -1  900.17   36.99
  -3  -5   1 1078.85   46.02
   3   5  -1  962.73   38.56
   3   5  -1  779.81   62.97
  -3  -5   0 1764.36   61.23
  -3  -5   0 1999.97   67.72
  -3  -5  -1  153.41   19.94
   3   5   1  204.50   23.84
  -3  -5  -2   26.74    9.27
   3   5   2   50.51   12.79
  -3  -5  -3  223.02   26.56
   3   5   3  326.57   33.36
  -3  -5  -4  279.73   33.25
   3   5   4  235.78   28.07
   3   5   5   14.69    5.98
  -3  -5  -5   18.91    7.13
  -3  -5  -5    2.85    3.11
  -3  -5  -6   -0.84    1.61
  -3  -5  -6   -2.18    3.75
  -3  -5  -7  221.08   18.89
  -3  -5  -7  208.56   23.18
  -3  -5  -8    0.27    0.85
  -3  -5  -8    7.20    2.93
  -3  -5  -8    5.01    2.69
  -3  -5  -9  316.25   18.20
   3   6 -15  928.25   32.56
   3   6 -14  325.79   23.65
  -3  -6  14  309.79   21.07
  -3  -6  14  347.92   21.62
  -3  -6  13   22.90    6.98
   3   6 -13    7.31    2.94
  -3  -6  13   21.62    6.65
  -3  -6  12   27.85    8.07
  -3  -6  12   40.52   10.04
  -3  -6  11  268.35   28.55
  -3  -6  11  403.15   32.77
  -3  -6  10   87.62   14.78
  -3  -6  10   56.18   13.31
  -3  -6   9  510.04   40.01
  -3  -6   9  630.94   37.65
  -3  -6   8   18.51    6.48
  -3  -6   8   22.49    9.08
  -3  -6   7    2.87    2.86
  -3  -6   7    3.02    4.23
  -3  -6   6 1485.50   50.30
  -3  -6   5 1088.77   42.29
  -3  -6   4    0.89    2.33
  -3  -6   3  588.74   31.91
  -3  -6   2 1110.78   44.89
  -3  -6   2 1165.91   43.97
  -3  -6   1  255.34   22.48
  -3  -6   0   11.93    5.63
  -3  -6   0    8.85    4.58
  -3  -6  -1  291.68   28.48
  -3  -6  -1  375.09   32.86
  -3  -6  -2  104.66   18.83
  -3  -6  -2   36.03   10.30
  -3  -6  -3   76.71   15.25
  -3  -6  -3  166.30   24.86
  -3  -6  -4  181.21   22.66
  -3  -6  -4   60.62   14.40
  -3  -6  -5    5.93    3.69
  -3  -6  -5    0.16    4.15
  -3  -6  -6   50.05    9.09
  -3  -6  -6   43.58   10.60
  -3  -6  -7  791.23   30.61
  -3  -6  -7  737.27   35.82
  -3  -6  -8  176.99   11.08
   3   7 -14  137.17   13.93
  -3  -7  14  129.19   11.80
  -3  -7  13   21.16    5.94
   3   7 -13   12.69    4.42
  -3  -7  13   15.87    5.26
  -3  -7  12  146.13   18.38
  -3  -7  12  128.49   16.37
  -3  -7  11  525.04   38.07
  -3  -7  11  740.82   41.30
  -3  -7  10  124.20   19.39
  -3  -7  10  141.16   17.61
  -3  -7   9   -0.59    2.13
  -3  -7   9    0.68    2.46
  -3  -7   8 1098.67   58.40
  -3  -7   8 1197.74   48.63
  -3  -7   7  545.41   32.16
  -3  -7   7  600.68   43.46
  -3  -7   6    6.29    3.15
  -3  -7   5   10.46    4.53
  -3  -7   4 1244.03   47.52
  -3  -7   3   15.51    5.52
  -3  -7   2 2973.20   77.44
  -3  -7   2 2946.40   72.03
  -3  -7   1    3.49    0.93
  -3  -7   1    6.02    2.89
  -3  -7   0  246.93   24.61
  -3  -7  -1  416.60   33.65
  -3  -7  -2  129.66   19.25
  -3  -7  -3    0.43    3.71
  -3  -7  -3   -2.21    4.33
  -3  -7  -4   25.09    7.50
  -3  -7  -4    2.53    2.01
  -3  -7  -5  649.65   33.56
  -3  -7  -6  186.31   14.96
   3   8 -14   74.40    8.58
  -3  -8  13  627.41   28.17
   3   8 -13  708.30   32.35
  -3  -8  12   66.46   10.88
  -3  -8  12   76.62   10.85
  -3  -8  11   13.68    4.97
  -3  -8  11   12.28    5.26
  -3  -8  10  124.66   18.55
  -3  -8  10  167.71   18.07
  -3  -8   9  322.98   31.12
  -3  -8   9  369.86   26.39
  -3  -8   8   46.13   12.49
  -3  -8   8   56.76   10.31
  -3  -8   7  270.35   22.12
  -3  -8   7  267.81   30.15
  -3  -8   6    4.57    3.78
  -3  -8   6    3.27    5.03
  -3  -8   5   35.55    8.22
  -3  -8   4  784.08   38.25
  -3  -8   3  182.47   18.95
  -3  -8   2    8.64    4.51
  -3  -8   1  118.41   16.09
  -3  -8   1  112.38   14.66
  -3  -8   0 1086.23   50.89
  -3  -8   0 1031.72   47.72
  -3  -8  -1    6.44    1.88
  -3  -8  -1    4.65    1.75
  -3  -8  -2   -0.36    3.76
  -3  -8  -2    0.41    2.15
  -3  -8  -3  100.84   14.26
  -3  -8  -3  158.26   17.92
  -3  -8  -4   49.84    8.99
  -3  -8  -4   52.82    9.04
  -3  -8  -5  246.73   14.31
  -3  -8  -5  297.88   17.56
  -3  -8  -5  292.42   17.46
   3   9 -12   12.85    4.05
   3   9 -12   24.58    6.10
  -3  -9  12   21.34    5.21
  -3  -9  11   30.18    7.53
  -3  -9  10  134.42   17.97
  -3  -9  10  165.48   16.58
  -3  -9   9  635.79   41.95
  -3  -9   9  802.33   36.67
  -3  -9   8    3.35    1.89
  -3  -9   8    6.33    5.46
  -3  -9   7    9.89    4.24
  -3  -9   7   10.81    6.16
  -3  -9   6  574.82   31.17
  -3  -9   6  616.11   47.05
  -3  -9   5  545.95   30.92
  -3  -9   5  610.40   49.28
  -3  -9   4    4.84    3.53
  -3  -9   3    3.47    2.54
  -3  -9   2  273.90   23.57
  -3  -9   1   17.63    6.16
  -3  -9   0  171.87   17.01
  -3  -9   0  158.02   18.27
  -3  -9  -1   -1.18    2.95
  -3  -9  -1   -1.92    2.99
  -3  -9  -2    6.51    2.78
  -3  -9  -2    9.62    3.75
  -3  -9  -3  361.67   21.54
  -3  -9  -3  376.81   20.64
  -3 -10  10   21.91    6.44
  -3 -10   9   10.27    5.55
  -3 -10   8  150.46   20.65
  -3 -10   8  139.24   14.59
  -3 -10   7  253.22   28.92
  -3 -10   7  276.41   20.78
  -3 -10   6  151.98   24.01
  -3 -10   6  152.07   15.49
  -3 -10   5  243.04   19.94
  -3 -10   5  235.64   31.60
  -3 -10   4   39.02    8.01
  -3 -10   4   30.42   12.40
  -3 -10   3   98.73   13.24
   3  10  -3   94.78   13.90
  -3 -10   2  507.83   29.92
   3  10  -2  445.97   32.30
  -3 -10   1  107.90   13.73
   3  10  -1   80.31   13.81
  -3 -10   0    9.39    3.48
   3  10   0   32.68    8.51
  -4  13   0 1715.18  127.37
  -4  13  -1  761.49   88.40
  -4  13  -2    1.38    4.86
  -4  13  -3  118.82   27.32
  -4  13  -4  826.14   62.04
  -4  12   4   93.43   14.74
  -4  12   3    0.87    3.56
  -4  12   2  825.52   70.13
  -4  12   2  255.17   29.62
  -4  12   1  928.44   90.51
  -4  12   1  465.43   39.46
  -4  12   0   20.35   13.43
  -4  12   0   37.56   11.16
  -4  12  -1   -0.88    6.76
  -4  12  -1   34.57   11.12
  -4  12  -2  474.56   59.75
  -4  12  -3   32.06    9.81
  -4  12  -3   37.95   14.84
  -4  12  -4 1151.55   57.09
  -4  12  -4 1208.62   74.90
  -4  12  -5   77.95   14.90
  -4  12  -5   70.11   16.30
  -4  12  -6   65.52   13.36
  -4  12  -6   83.67   16.07
  -4  12  -7  110.33   16.56
  -4  11   6  362.11   25.56
  -4  11   5  161.41   20.66
  -4  11   4   18.57    8.31
  -4  11   3  260.08   30.79
  -4  11   2  320.97   50.87
  -4  11   2  127.54   21.34
  -4  11   1  406.74   62.85
  -4  11   1  515.40   41.27
  -4  11   0   10.15   10.08
  -4  11   0   14.69   12.15
  -4  11   0    6.79    3.67
  -4  11  -1   68.98   13.76
  -4  11  -1   56.35   21.34
  -4  11  -1   50.82   20.84
  -4  11  -1   66.77   12.75
  -4  11  -2 1064.55   53.79
  -4  11  -2 1159.30   89.50
  -4  11  -2 1134.86   50.23
  -4  11  -3  531.57   38.41
  -4  11  -3  558.39   55.93
  -4  11  -3  598.38   34.67
  -4  11  -4    2.60    2.14
  -4  11  -4    1.72    2.59
  -4  11  -5  216.97   25.27
  -4  11  -5  218.33   29.86
  -4  11  -6  731.61   46.86
  -4  11  -6  686.77   49.05
  -4  11  -7    4.76    2.46
  -4  11  -7   28.12   11.19
  -4  11  -8   32.09    8.48
  -4  11  -8   88.10   12.12
  -4  11  -9   20.73    6.83
  -4  11  -9   28.90    6.06
  -4  10   8  132.27   12.59
  -4  10   7  358.05   26.30
  -4  10   6  252.50   25.95
  -4  10   5   23.65    7.36
  -4  10   5   12.23    5.91
  -4  10   4  105.93   18.53
  -4  10   4   30.91   10.70
  -4  10   3 1459.04   84.00
  -4  10   3 1861.26  113.26
  -4  10   2  356.52   56.31
  -4  10   2  354.95   35.23
  -4  10   1    1.62    0.48
  -4  10   1   -1.91    6.58
  -4  10   1    3.84    5.27
  -4  10   1    7.06    5.91
  -4  10   0  700.11   42.13
  -4  10   0  668.36   37.05
  -4  10   0  612.68   73.66
  -4  10   0  729.12   44.11
  -4  10  -1  626.47   39.95
  -4  10  -1  610.14   35.53
  -4  10  -1  517.57   69.70
  -4  10  -1  699.21   72.31
  -4  10  -1  668.57   39.43
  -4  10  -2   65.28   13.04
  -4  10  -2   58.21   11.00
  -4  10  -2   43.83   15.56
  -4  10  -2   76.57   22.77
  -4  10  -2   57.47   10.81
  -4  10  -3   34.80    9.76
  -4  10  -3   35.94    8.82
  -4  10  -3   27.74   10.05
  -4  10  -3   35.88   14.04
  -4  10  -3   38.59    8.32
  -4  10  -4  335.57   28.48
  -4  10  -4  347.68   31.58
  -4  10  -4  327.21   39.50
  -4  10  -5   34.91   10.88
  -4  10  -5   33.96    9.95
  -4  10  -5   29.85   10.66
  -4  10  -6  454.98   38.27
  -4  10  -6  425.51   34.22
  -4  10  -6  374.52   37.64
  -4  10  -7   34.20   10.44
  -4  10  -7   27.14    8.61
  -4  10  -7   51.94   12.08
  -4  10  -7   52.18   14.18
  -4  10  -8   12.50    5.67
  -4  10  -8    7.28    3.78
  -4  10  -9  584.41   38.31
  -4  10  -9  568.30   34.13
  -4  10 -10  952.97   41.78
  -4  10 -10  954.28   36.11
  -4  10 -10 1009.34   35.05
  -4   9   9  993.20   35.02
  -4   9   9  960.31   34.28
  -4   9   8  654.39   35.20
  -4   9   8  535.22   29.58
  -4   9   7    8.19    5.04
  -4   9   6  145.33   16.61
  -4   9   6  188.34   24.97
  -4   9   5  897.97   49.18
  -4   9   5  547.17   45.77
  -4   9   4  158.74   24.79
  -4   9   4   76.68   17.25
  -4   9   3  232.06   23.35
  -4   9   3  237.04   29.22
  -4   9   2   30.93    8.20
  -4   9   2   32.09   16.78
  -4   9   2   15.99   11.97
  -4   9   2   33.66   10.94
  -4   9   1  144.81   18.93
  -4   9   1  137.78   16.96
  -4   9   1  218.40   52.51
  -4   9   1   80.38   28.24
  -4   9   1  169.85   21.82
  -4   9   0  357.18   28.78
  -4   9   0  349.56   26.38
  -4   9   0  369.22   54.27
  -4   9   0  386.23   30.38
  -4   9  -1  935.37   46.78
  -4   9  -1  902.03   42.89
  -4   9  -1 1004.19   83.24
  -4   9  -1  963.64   45.10
  -4   9  -2   13.47    6.03
  -4   9  -2    7.12    4.03
  -4   9  -2   10.06    8.27
  -4   9  -2   13.18    7.89
  -4   9  -2    5.65    2.83
  -4   9  -3   58.17   12.38
  -4   9  -3   46.52   10.56
  -4   9  -3   37.22   12.06
  -4   9  -3   46.02   14.89
  -4   9  -4 1500.23   64.63
  -4   9  -4 1498.46   61.64
  -4   9  -4 1352.77   79.41
  -4   9  -5  431.77   36.48
  -4   9  -5  416.69   34.22
  -4   9  -5  334.17   38.26
  -4   9  -6    5.71    3.65
  -4   9  -6    2.25    1.97
  -4   9  -6    5.99    4.43
  -4   9  -6    2.56    3.12
  -4   9  -7  689.32   47.14
  -4   9  -7  659.36   48.41
  -4   9  -7  598.14   47.43
  -4   9  -8  184.53   25.14
  -4   9  -8  179.30   23.75
  -4   9  -9  107.59   18.01
  -4   9  -9   93.67   15.93
  -4   9 -10  129.13   17.33
  -4   9 -10  121.02   16.32
  -4   9 -10  124.73   13.53
  -4   9 -11  216.66   18.35
  -4   9 -11  187.94   15.89
  -4   9 -11  182.87   13.79
  -4   8  11  362.84   17.76
  -4   8  10  754.26   29.67
  -4   8  10  728.31   30.43
  -4   8   9    0.64    1.19
  -4   8   9    2.35    2.69
  -4   8   8  128.36   18.50
  -4   8   8  130.00   16.48
  -4   8   7  366.00   30.11
  -4   8   7  407.08   36.29
  -4   8   6    1.22    1.18
  -4   8   6   -0.01    2.34
  -4   8   5  538.63   40.60
  -4   8   5  268.51   32.06
  -4   8   4   60.63   12.38
  -4   8   4   61.18   16.32
  -4   8   4   34.89   10.97
  -4   8   3   46.13   10.09
  -4   8   3   66.96   21.44
  -4   8   3   42.26   11.75
  -4   8   2  697.66   39.72
  -4   8   2  642.71   35.42
  -4   8   2  691.02   43.91
  -4   8   1 2098.36   66.58
  -4   8   1 2061.90   62.17
  -4   8   1 2187.82   71.92
  -4   8   0   58.59   10.97
  -4   8   0   56.39   10.42
  -4   8   0   53.55   27.65
  -4   8   0   55.14   20.19
  -4   8   0   59.36   11.11
  -4   8  -1    3.24    2.16
  -4   8  -1    9.30    3.52
  -4   8  -1   13.93   13.90
  -4   8  -1   17.74   12.28
  -4   8  -1    6.43    4.25
  -4   8  -2 1743.23   61.96
  -4   8  -2 1737.88   60.11
  -4   8  -2 1896.22  101.28
  -4   8  -3  857.18   45.40
  -4   8  -3  842.81   44.63
  -4   8  -3  469.17   53.75
  -4   8  -3  578.10   45.17
  -4   8  -3  740.68   60.24
  -4   8  -4  130.00   18.59
  -4   8  -4  131.46   18.46
  -4   8  -4  103.34   21.76
  -4   8  -5   46.25   11.71
  -4   8  -5   49.22   12.05
  -4   8  -5   48.09   15.01
  -4   8  -5   22.19    8.43
  -4   8  -6  169.93   24.15
  -4   8  -6  197.75   26.16
  -4   8  -6  226.41   30.01
  -4   8  -6  120.27   22.56
  -4   8  -7   74.78   16.71
  -4   8  -7   81.36   17.47
  -4   8  -7  122.16   19.85
  -4   8  -7   93.75   21.34
  -4   8  -8  444.76   40.79
  -4   8  -8  470.68   42.28
  -4   8  -9  154.45   22.86
  -4   8  -9  138.18   21.35
  -4   8  -9  215.02   21.44
  -4   8 -10   -2.52    1.45
  -4   8 -10    0.78    1.52
  -4   8 -11  918.44   41.35
  -4   8 -11  942.65   41.73
  -4   8 -12  659.24   27.21
  -4   8 -12  542.12   21.21
  -4   7  12  204.62   13.22
  -4   7  11   77.87    9.12
  -4   7  11   77.25    9.63
  -4   7  10  738.66   34.90
  -4   7  10  707.12   33.73
  -4   7   9    0.18    0.97
  -4   7   9    2.65    3.56
  -4   7   8   16.22    6.73
  -4   7   8    9.92    3.88
  -4   7   7 2430.25   83.33
  -4   7   7 1972.34   83.08
  -4   7   6  310.84   27.78
  -4   7   6  268.38   31.62
  -4   7   5   -0.01    1.17
  -4   7   5   -0.98    3.15
  -4   7   4  290.54   25.33
  -4   7   4  312.54   38.02
  -4   7   4  242.55   28.85
  -4   7   3 1651.16   60.08
  -4   7   3 1679.50   57.10
  -4   7   3 1572.50   67.79
  -4   7   2  115.13   14.96
  -4   7   2  105.63   13.77
  -4   7   2  156.21   39.86
  -4   7   2  118.97   16.91
  -4   7   1  317.54   24.22
  -4   7   1  320.27   23.48
  -4   7   1  305.81   29.60
  -4   7   1  329.59   70.83
  -4   7   1  278.03   47.25
  -4   7   1  334.51   25.80
  -4   7   0  105.75   13.90
  -4   7   0  105.36   13.48
  -4   7   0   97.87   17.61
  -4   7   0   63.61   30.88
  -4   7   0  114.31   27.56
  -4   7  -1  667.65   35.36
  -4   7  -1  679.78   35.30
  -4   7  -1  669.10   49.30
  -4   7  -1  758.90   67.01
  -4   7  -2 1064.96   46.26
  -4   7  -2 1089.07   46.81
  -4   7  -2  928.31   61.39
  -4   7  -2 1053.80   74.10
  -4   7  -3  758.50   41.58
  -4   7  -3  799.64   42.75
  -4   7  -3  672.62   56.15
  -4   7  -4   16.66    6.58
  -4   7  -4   19.80    7.24
  -4   7  -4   11.83    6.35
  -4   7  -4    6.96    2.72
  -4   7  -5  193.27   24.30
  -4   7  -5  225.94   27.04
  -4   7  -5  175.20   28.00
  -4   7  -5  131.94   23.71
  -4   7  -6 2128.27   87.51
  -4   7  -6 2250.14   92.60
  -4   7  -7  204.95   28.32
  -4   7  -7  229.31   31.34
  -4   7  -8    6.12    1.91
  -4   7  -8    2.61    3.90
  -4   7  -9  301.59   32.84
  -4   7  -9  297.96   34.46
  -4   7 -10  763.72   47.12
  -4   7 -10  823.28   50.60
  -4   7 -10  728.62   35.94
  -4   7 -11    4.24    1.89
  -4   7 -11    7.42    3.39
  -4   7 -11    5.57    2.97
  -4   7 -12    8.84    3.71
  -4   7 -12    7.32    3.61
  -4   7 -12    2.07    1.00
  -4   6  13  118.90    9.60
  -4   6  12 1006.73   32.53
  -4   6  12  981.29   33.16
  -4   6  11   93.36   11.28
  -4   6  11   89.69   11.49
  -4   6  11   94.95   11.83
  -4   6  10   20.82    6.42
  -4   6  10   24.79    6.42
  -4   6  10   22.85    6.07
  -4   6   9 1299.87   54.63
  -4   6   9 1347.88   52.95
  -4   6   9 1384.78   60.50
  -4   6   8 1399.71   61.94
  -4   6   8 1319.65   64.89
  -4   6   7  198.77   25.57
  -4   6   7  123.55   21.31
  -4   6   6   33.36    9.29
  -4   6   6   25.09    9.96
  -4   6   5 2014.68   68.26
  -4   6   5 1553.15   72.64
  -4   6   4  157.73   17.71
  -4   6   4  160.22   27.44
  -4   6   4  122.99   19.45
  -4   6   4  123.59   15.60
  -4   6   3 1220.14   45.32
  -4   6   2  162.32   15.73
  -4   6   1   93.20   11.60
   4  -6   0 1780.60   55.66
  -4   6   0 1515.54   46.01
  -4   6  -1 1629.57   49.87
   4  -6   1 1883.42   66.90
  -4   6  -2   61.29   10.25
   4  -6   2   62.13   13.99
  -4   6  -3  164.48   17.95
  -4   6  -3  222.75   22.60
  -4   6  -3  186.34   29.29
  -4   6  -4 2283.71   75.78
  -4   6  -4 2495.67   83.07
  -4   6  -4 1075.53   62.17
  -4   6  -4  907.40   62.23
  -4   6  -4 1571.03   83.87
  -4   6  -5  905.88   52.50
  -4   6  -5  993.64   58.12
  -4   6  -6   85.73   17.69
  -4   6  -6   86.94   19.14
  -4   6  -6   84.68   17.79
  -4   6  -7   45.12   13.83
  -4   6  -7   33.45   12.34
  -4   6  -7   73.20   15.28
  -4   6  -8  162.88   26.22
  -4   6  -8  193.03   30.23
  -4   6  -9  134.76   22.26
  -4   6  -9  138.11   24.24
  -4   6  -9  157.64   18.96
  -4   6 -10  849.39   50.68
  -4   6 -10  734.87   37.13
  -4   6 -11   87.58   13.56
  -4   6 -11   86.30   14.48
  -4   6 -11   63.83    9.38
  -4   6 -12   55.20    8.69
  -4   6 -12   67.55   10.19
  -4   6 -12   49.69    6.97
  -4   5  14  685.65   21.53
  -4   5  13  160.77   12.62
  -4   5  13  164.31   12.95
  -4   5  12   12.29    4.24
  -4   5  12   12.03    3.82
  -4   5  12   11.59    3.61
  -4   5  11   52.52    9.44
  -4   5  11   54.80    9.92
  -4   5  11   44.85    8.85
  -4   5  10  265.10   23.47
  -4   5  10  279.29   25.86
  -4   5  10  259.44   23.52
  -4   5   9  247.21   24.62
  -4   5   9  221.46   25.48
  -4   5   9  241.76   24.31
  -4   5   9  223.89   25.68
  -4   5   8  511.42   39.29
  -4   5   8  435.33   38.33
  -4   5   8  446.16   39.00
  -4   5   7    5.91    4.61
  -4   5   7    2.12    3.18
  -4   5   7    3.65    5.74
  -4   5   6  284.63   27.21
  -4   5   6  232.70   28.89
  -4   5   6  220.21   28.57
  -4   5   5 1871.80   59.94
  -4   5   4  959.12   39.12
  -4   5   3    1.75    1.94
  -4   5   2 1044.89   36.43
   4  -5  -1 1608.25   45.74
  -4   5   1 1502.36   42.57
  -4   5   0    0.90    0.54
  -4   5   0    2.84    2.24
   4  -5   0    3.66    2.80
  -4   5  -1    8.95    3.52
   4  -5   1   11.20    5.32
  -4   5  -1    6.44    4.17
  -4   5  -2  775.94   35.37
  -4   5  -2  707.73   52.30
   4  -5   2  717.72   46.94
  -4   5  -3  188.11   18.78
   4  -5   3   65.60   15.72
  -4   5  -4  450.73   31.95
  -4   5  -4  421.62   44.17
  -4   5  -5  784.11   48.59
  -4   5  -5  712.36   52.94
  -4   5  -6   37.17   11.25
  -4   5  -6   46.56   14.21
  -4   5  -6   75.31   17.01
  -4   5  -7  210.05   29.01
  -4   5  -7  268.60   37.23
  -4   5  -8  961.32   62.12
  -4   5  -8  975.06   71.50
  -4   5  -9  155.71   23.76
  -4   5  -9  205.94   31.03
  -4   5  -9  169.70   19.72
  -4   5 -10   55.56   12.76
  -4   5 -10   80.56   16.95
  -4   5 -10   48.31    9.63
  -4   5 -11  955.81   45.09
  -4   5 -11 1124.18   52.88
  -4   5 -12  767.57   32.60
  -4   5 -12  838.00   36.24
  -4   4  14  281.17   15.69
  -4   4  14  310.55   16.48
  -4   4  13   85.89   10.23
  -4   4  13   86.10   10.27
  -4   4  13   94.16   10.01
  -4   4  12   61.26    9.96
  -4   4  12   60.50    9.73
  -4   4  12   60.55    9.85
  -4   4  11  598.47   34.06
  -4   4  11  683.47   37.21
  -4   4  11  638.20   36.21
  -4   4  11  627.86   37.64
  -4   4  10 2251.39   72.15
  -4   4  10 2434.00   76.52
  -4   4  10 2303.01   77.48
  -4   4  10 2514.44   79.45
  -4   4   9  316.22   28.61
  -4   4   9  329.04   30.99
  -4   4   9  344.77   32.26
  -4   4   8  216.16   25.27
  -4   4   8  240.18   28.86
  -4   4   8  210.51   27.04
  -4   4   7 1704.28   79.96
  -4   4   7 1506.81   74.87
  -4   4   6 1135.46   47.14
   4  -4  -6  802.14   44.58
  -4   4   5   31.18    6.95
   4  -4  -5   28.64    7.37
   4  -4  -4  200.67   16.69
  -4   4   4  214.40   16.74
   4  -4  -3 1075.72   35.02
  -4   4   3 1131.04   36.03
   4  -4  -2  143.58   12.19
   4  -4  -2  145.35   11.96
  -4   4   2  173.28   16.72
  -4   4   2  148.97   12.50
   4  -4  -1 2579.78   58.69
  -4   4   1 2771.92   67.26
  -4   4   0    3.22    1.97
  -4   4   0    5.26    3.25
   4  -4   0    7.22    4.03
  -4   4   0   10.63    4.78
  -4   4  -1   11.30    4.03
   4  -4   1    8.33    5.01
  -4   4  -1   10.03    4.96
  -4   4  -2 1758.99   51.51
  -4   4  -2 1802.82   61.16
  -4   4  -3 1111.97   45.36
  -4   4  -3 1024.85   49.72
  -4   4  -4   90.05   14.17
   4  -4   4   76.98   17.22
  -4   4  -5  197.05   24.27
  -4   4  -5  244.67   30.93
  -4   4  -5  174.06   25.82
  -4   4  -6 1090.19   61.84
  -4   4  -6 1406.99   80.57
  -4   4  -7   22.06    8.46
  -4   4  -7   47.69   15.60
  -4   4  -8  114.89   20.89
  -4   4  -8  145.42   28.38
  -4   4  -8  173.92   21.65
  -4   4  -9  103.28   18.91
  -4   4  -9  104.36   22.50
  -4   4  -9   75.57   13.17
  -4   4 -10   95.74   16.29
  -4   4 -10  115.86   20.86
  -4   4 -10   68.73   11.13
  -4   4 -11  193.45   19.78
  -4   4 -11  148.87   14.22
  -4   4 -12  397.16   22.70
  -4   4 -12  417.74   24.51
  -4   3  15  502.66   19.38
  -4   3  15  505.63   18.37
  -4   3  14   -0.53    0.90
  -4   3  14    2.17    1.71
  -4   3  13  289.31   20.31
  -4   3  13  337.96   20.94
  -4   3  13  324.03   22.05
  -4   3  13  277.65   20.65
  -4   3  12 1297.90   48.24
  -4   3  12 1412.83   52.10
  -4   3  12 1332.78   51.03
  -4   3  12 1401.43   49.57
  -4   3  11  156.48   18.45
  -4   3  11  173.23   20.36
  -4   3  11  157.37   19.11
  -4   3  10   91.86   15.00
  -4   3  10   97.48   17.63
  -4   3  10  104.47   16.51
  -4   3   9  384.80   35.97
  -4   3   9  453.33   37.22
  -4   3   9  429.15   33.54
  -4   3   8  278.37   31.09
  -4   3   8  309.20   30.18
  -4   3   7  251.02   22.76
   4  -3  -7  202.67   22.49
  -4   3   6  761.21   35.30
   4  -3  -6  682.78   34.54
  -4   3   5  124.68   12.72
   4  -3  -5  128.70   13.18
   4  -3  -4   51.52    7.75
  -4   3   4   56.54    7.76
   4  -3  -3 3957.63   60.64
  -4   3   3 3951.92   60.94
   4  -3  -2   35.55    6.20
  -4   3   2   39.99    7.46
  -4   3   2   34.61    5.52
  -4   3   1  131.04   12.87
  -4   3   1  128.56   10.36
   4  -3  -1  124.82   13.16
  -4   3   0 1863.96   48.59
   4  -3   0 1959.20   59.75
  -4   3  -1 1860.01   48.91
  -4   3  -1 1978.20   51.20
   4  -3   1 1892.58   67.13
  -4   3  -2    3.34    2.03
   4  -3   2    0.86    0.74
  -4   3  -2    4.23    2.27
  -4   3  -3   65.35   10.61
  -4   3  -3   60.13   10.29
  -4   3  -4  492.94   32.95
  -4   3  -4  492.44   33.14
   4  -3   4  475.33   41.44
  -4   3  -5    4.61    2.99
  -4   3  -5   -1.41    3.32
  -4   3  -5    5.13    4.13
  -4   3  -5    1.83    3.60
  -4   3  -6  463.77   39.57
  -4   3  -6  669.03   57.98
  -4   3  -7   31.12   10.30
  -4   3  -7   17.49    9.73
  -4   3  -8   28.44   10.05
  -4   3  -8   28.67   13.45
  -4   3  -8   22.13    7.71
  -4   3  -9  495.08   38.79
  -4   3  -9  410.58   29.69
  -4   3  -9  466.60   35.01
  -4   3 -10 1412.72   58.88
  -4   3 -10 1361.46   54.08
  -4   3 -11   92.78   12.79
  -4   3 -11  110.34   15.23
  -4   3 -11   57.92    8.71
  -4   3 -11   70.88   10.76
  -4   3 -12   48.03    7.31
  -4   3 -12   51.73    7.81
  -4   2  15   17.61    3.74
  -4   2  15   15.92    3.75
  -4   2  14  691.83   28.98
  -4   2  14  695.60   30.53
  -4   2  14  633.53   28.50
  -4   2  14  697.72   26.99
  -4   2  13    3.65    3.06
  -4   2  13    3.94    3.54
  -4   2  13    2.30    2.17
  -4   2  12  670.03   36.82
  -4   2  12  762.59   42.43
  -4   2  12  704.26   37.59
  -4   2  11   63.96   14.30
  -4   2  11   74.15   13.43
  -4   2  11   69.17   12.74
  -4   2  10   38.03    9.91
  -4   2  10   42.28   12.52
  -4   2  10   42.24   10.69
  -4   2   9 1256.20   61.88
  -4   2   9 1135.83   55.69
  -4   2   8  891.69   57.11
  -4   2   8 2681.27   97.32
  -4   2   7   20.30    6.06
   4  -2  -7   25.93    7.41
  -4   2   6   28.98    6.29
   4  -2  -6   26.68    6.38
  -4   2   5 1488.69   45.85
   4  -2  -5 1396.57   41.28
  -4   2   4 1542.61   44.38
   4  -2  -4 1490.05   40.26
   4  -2  -4 1520.49   38.00
  -4   2   3  486.96   23.67
   4  -2  -3  445.99   18.26
   4  -2  -3  436.22   21.19
  -4   2   2 1057.90   34.04
   4  -2  -2  995.43   26.82
   4  -2  -2 1044.12   35.10
  -4   2   1  204.70   14.94
   4  -2  -1  194.90   12.15
   4  -2  -1  205.32   17.35
  -4   2   0  140.98   12.28
   4  -2   0  146.44   11.03
   4  -2   0  147.08   16.77
  -4   2  -1 1094.34   36.65
  -4   2  -1 1144.28   36.67
   4  -2   1 1155.57   33.79
   4  -2   1 1031.96   49.59
  -4   2  -2    3.36    2.41
   4  -2   2    1.98    2.62
  -4   2  -2    4.68    2.91
   4  -2   2    4.25    2.19
  -4   2  -3    2.84    2.42
   4  -2   3    2.99    3.29
  -4   2  -3    3.65    2.77
   4  -2   3    6.91    3.63
  -4   2  -4 1327.45   51.17
   4  -2   4 1494.97   54.31
   4  -2   4 1470.72   70.76
  -4   2  -5  753.11   42.74
  -4   2  -5  736.58   52.22
  -4   2  -6    3.43    2.42
  -4   2  -6    0.34    1.43
  -4   2  -6    3.93    4.74
  -4   2  -7  199.67   26.32
  -4   2  -7  175.48   29.23
  -4   2  -7  169.27   24.30
  -4   2  -8 1089.91   58.64
  -4   2  -8 1153.38   54.01
  -4   2  -8 1037.74   58.07
  -4   2  -9   52.64   12.26
  -4   2  -9   40.70    9.40
  -4   2  -9   42.94   11.05
  -4   2 -10   66.10   12.13
  -4   2 -10   44.36    8.50
  -4   2 -10   59.93   11.65
  -4   2 -11   87.65   11.54
  -4   2 -11   62.09    8.22
  -4   2 -11   76.61   11.10
  -4   1  15   15.49    3.64
  -4   1  15   14.62    4.16
  -4   1  15   11.05    3.16
  -4   1  14 1121.53   39.30
  -4   1  14 1188.13   43.59
  -4   1  13  276.16   22.24
  -4   1  13  310.65   26.24
  -4   1  13  250.80   21.06
  -4   1  12    9.77    5.20
  -4   1  12   20.06    8.17
  -4   1  12    7.77    3.35
  -4   1  11  417.84   37.55
  -4   1  11  392.72   30.76
  -4   1  11  403.66   30.99
  -4   1  10 1644.21   67.09
  -4   1  10 1440.68   61.53
  -4   1   9    6.99    4.91
  -4   1   9    5.77    4.69
   4  -1  -8   20.40    7.18
  -4   1   7  652.13   35.48
   4  -1  -7  758.90   36.34
  -4   1   6  409.95   25.98
   4  -1  -6  414.09   24.26
   4  -1  -6  381.31   21.59
  -4   1   5 1633.22   47.80
   4  -1  -5 1485.71   42.48
   4  -1  -5 1572.66   39.92
   4  -1  -5 1576.51   40.57
  -4   1   4  316.77   19.74
   4  -1  -4  299.83   17.72
   4  -1  -4  305.82   16.60
  -4   1   3  267.99   17.25
   4  -1  -3  255.41   17.40
   4  -1  -3  246.72   14.56
   4  -1  -2  772.22   31.85
  -4   1   2  779.70   28.63
   4  -1  -2  737.39   24.96
  -4   1   1 1474.17   39.53
   4  -1  -1 1539.78   49.94
  -4   1   0  316.58   18.25
   4  -1   0  309.70   17.51
   4  -1   0  354.47   26.66
   4  -1   1   10.92    4.91
  -4   1  -1   14.57    4.58
   4  -1   1   11.90    3.71
  -4   1  -2 1564.17   44.36
   4  -1   2 1644.25   48.04
  -4   1  -3 2322.95   58.55
   4  -1   3 2542.68   67.42
  -4   1  -4   15.85    7.75
   4  -1   4   36.92   11.03
  -4   1  -4   30.62    7.59
   4  -1   4   30.65    8.44
  -4   1  -5   12.82    5.84
  -4   1  -5   10.55    6.57
  -4   1  -5    4.31    5.37
  -4   1  -6  255.92   23.20
  -4   1  -6  290.19   30.38
  -4   1  -7    3.57    2.57
  -4   1  -7    8.37    4.27
  -4   1  -7   -1.44    4.49
  -4   1  -8  448.09   32.58
  -4   1  -8  407.86   38.64
  -4   1  -9  114.38   15.94
  -4   1  -9   84.79   12.41
  -4   1  -9  104.39   17.52
  -4   1 -10   52.43    9.89
  -4   1 -10   29.92    6.47
  -4   1 -10   53.88   10.78
  -4   1 -11  567.45   28.29
  -4   0  15 1031.34   31.23
  -4   0  15 1048.99   35.50
  -4   0  14   35.77    7.50
  -4   0  14   42.10    8.57
  -4   0  14   31.62    6.75
  -4   0  13   16.00    5.72
  -4   0  13   12.86    4.39
  -4   0  13   25.96    8.95
  -4   0  13   11.33    4.28
  -4   0  12  469.52   31.86
  -4   0  12  481.78   32.79
  -4   0  11   38.08    9.87
  -4   0  11   16.70    7.95
  -4   0  11   31.91    8.79
  -4   0  10  337.60   37.30
  -4   0  10  480.53   37.45
  -4   0   9    0.10    3.61
  -4   0   9   11.34    5.70
   4   0  -8   12.49    4.63
  -4   0   8    5.91    3.14
   4   0  -7 1980.29   57.06
   4   0  -7 1958.55   54.65
  -4   0   6 1672.82   53.23
   4   0  -6 1684.64   48.59
   4   0  -6 1831.05   48.21
   4   0  -6 1729.11   46.54
  -4   0   5   33.16    7.15
   4   0  -5   35.77    6.34
   4   0  -5   38.18    6.94
  -4   0   4  870.61   33.10
   4   0  -4  874.04   29.72
   4   0  -4  863.70   32.77
  -4   0   3 2229.99   50.45
   4   0  -3 2254.00   46.39
   4   0  -2  561.68   29.80
  -4   0   2  485.46   22.63
   4   0  -2  529.43   22.63
  -4   0   1  366.03   19.78
   4   0  -1  376.94   19.61
   4   0  -1  431.57   28.34
  -4   0   0  149.13   12.80
   4   0   0  155.03   13.38
   4   0   0  154.87   18.76
  -4   0  -1  495.41   23.96
   4   0   1  490.17   25.84
  -4   0  -2   76.95   10.10
   4   0   2   79.73   11.36
  -4   0  -3  978.15   38.55
   4   0   3 1002.97   45.61
  -4   0  -4    5.62    3.65
  -4   0  -4    5.64    4.22
  -4   0  -4    6.88    3.89
   4   0   4   14.04    6.95
  -4   0  -5  225.90   23.10
  -4   0  -5  194.71   25.90
  -4   0  -6 1746.56   59.96
  -4   0  -6 1805.36   74.65
  -4   0  -7  337.64   23.96
  -4   0  -7  378.85   31.74
  -4   0  -7  299.68   34.67
  -4   0  -8   13.37    5.81
  -4   0  -8   16.69    9.25
  -4   0  -9  414.97   25.87
  -4   0  -9  581.73   39.41
  -4   0 -10  865.53   40.04
  -4   0 -11   71.88    9.31
  -4  -1  15   37.06    7.05
  -4  -1  15   39.13    6.52
  -4  -1  14   42.40    8.34
  -4  -1  14   47.03   10.11
  -4  -1  14   38.20    7.61
  -4  -1  14   45.28    8.70
  -4  -1  13  138.44   20.43
  -4  -1  13  101.72   13.83
  -4  -1  13  109.82   14.95
  -4  -1  12 1481.17   73.54
  -4  -1  12 1391.81   56.22
  -4  -1  12 1364.53   58.42
  -4  -1  11  390.83   32.03
  -4  -1  11  291.91   28.72
  -4  -1  10    3.94    1.17
  -4  -1  10   19.87    8.35
  -4  -1   9 1137.34   62.06
  -4  -1   9  647.70   42.09
   4   1  -8 1848.24   61.95
   4   1  -8 2007.08   62.11
  -4  -1   8 1402.04   73.02
  -4  -1   8 1507.27   60.02
   4   1  -7    4.05    2.59
   4   1  -7    4.07    2.76
  -4  -1   7    4.48    2.50
   4   1  -7    3.24    2.38
   4   1  -6   10.69    3.96
   4   1  -6    7.81    3.79
  -4  -1   6    5.84    4.44
   4   1  -6    5.01    3.26
  -4  -1   5 1167.50   41.80
   4   1  -5 1195.36   37.73
   4   1  -5 1124.84   39.97
  -4  -1   4   73.00    9.77
   4   1  -4   74.27    9.14
   4   1  -4   85.47   11.23
  -4  -1   3 1102.68   36.18
   4   1  -3 1068.08   33.79
   4   1  -3 1191.33   44.07
  -4  -1   2  319.13   18.94
   4   1  -2  305.67   18.28
   4   1  -2  361.88   25.89
  -4  -1   1  138.50   12.53
   4   1  -1  125.93   12.24
   4   1  -1  138.58   17.44
  -4  -1   0  677.43   27.83
   4   1   0  664.51   29.97
   4   1   0  660.55   42.12
  -4  -1  -1 4233.71   71.97
   4   1   1 4261.12   82.86
  -4  -1  -2  604.31   28.98
   4   1   2  609.65   34.43
  -4  -1  -3   35.61   10.31
  -4  -1  -3   10.11    5.70
  -4  -1  -3   50.42   12.73
  -4  -1  -3   18.83    6.80
   4   1   3   38.07   11.74
  -4  -1  -4 1257.64   58.11
  -4  -1  -4  784.74   53.56
  -4  -1  -4  473.98   35.02
  -4  -1  -4  996.49   61.65
  -4  -1  -5  893.62   45.86
  -4  -1  -5  839.77   53.23
  -4  -1  -6   14.70    5.50
  -4  -1  -6   14.77    6.99
  -4  -1  -6    2.45    2.45
  -4  -1  -7   48.30   11.06
  -4  -1  -7   48.74    8.71
  -4  -1  -7   53.72   15.12
  -4  -1  -8  553.82   25.81
  -4  -1  -8  680.19   46.35
  -4  -1  -9   16.26    6.89
  -4  -1 -10  502.80   27.87
  -4  -2  15  206.64   15.70
  -4  -2  15  177.85   14.15
  -4  -2  14 1306.06   44.95
  -4  -2  14 1415.39   49.01
  -4  -2  13  443.40   35.90
   4   2 -13  385.69   26.78
  -4  -2  13  373.10   27.06
  -4  -2  13  399.77   29.90
  -4  -2  12   78.51   17.72
   4   2 -12   79.55   13.95
  -4  -2  12   88.40   14.87
  -4  -2  12  111.91   17.37
  -4  -2  11   11.60    4.95
  -4  -2  11   25.63    8.59
  -4  -2  10  467.80   38.25
  -4  -2  10  329.78   30.89
  -4  -2   9   39.15   11.62
  -4  -2   9   65.84   13.21
  -4  -2   8  414.26   40.26
  -4  -2   8  739.03   40.71
   4   2  -7   31.47    7.51
  -4  -2   7   21.66    6.53
   4   2  -7   31.49    7.23
   4   2  -7   19.35    5.69
   4   2  -6   10.36    4.08
  -4  -2   6    8.26    3.36
   4   2  -6    8.58    3.45
   4   2  -6   13.15    4.06
  -4  -2   5 2179.99   58.31
   4   2  -5 2151.93   53.33
   4   2  -5 2172.92   62.09
  -4  -2   4 1481.21   44.77
   4   2  -4 1503.91   43.28
   4   2  -4 1535.18   53.41
  -4  -2   3   15.91    4.55
   4   2  -3   24.22    7.59
   4   2  -3   11.67    3.61
  -4  -2   2  763.78   30.17
   4   2  -2  736.38   30.47
  -4  -2   1 1900.29   47.87
   4   2  -1 1748.46   49.02
   4   2  -1 1855.99   72.54
   4   2   0   14.42    7.54
  -4  -2   0   23.37    5.29
   4   2   0   29.27    6.82
   4   2   1    6.06    3.20
  -4  -2  -1    7.62    3.18
   4   2   1    3.96    3.04
  -4  -2  -2  195.50   26.22
  -4  -2  -2  215.28   23.40
  -4  -2  -3   44.16   12.96
  -4  -2  -3   57.39   12.89
  -4  -2  -4  146.76   22.91
  -4  -2  -4  137.92   19.65
  -4  -2  -4  167.00   26.25
  -4  -2  -5  297.38   25.92
  -4  -2  -5  281.13   26.70
  -4  -2  -6   24.22    6.71
  -4  -2  -6   41.84    9.37
  -4  -2  -6   16.10    8.46
  -4  -2  -7   37.26    7.36
  -4  -2  -7   47.83   13.57
  -4  -2  -8  808.06   29.32
  -4  -2  -8  994.90   52.46
  -4  -2  -9  395.52   27.65
  -4  -2 -10    4.07    2.26
   4   3 -15  194.05   13.56
  -4  -3  15  177.09   13.83
  -4  -3  15  196.65   15.04
  -4  -3  14  219.89   19.77
   4   3 -14  176.71   16.28
  -4  -3  14  169.20   16.08
  -4  -3  14  190.69   17.94
  -4  -3  13  393.25   32.78
   4   3 -13  321.88   25.86
  -4  -3  13  333.69   25.73
  -4  -3  13  354.56   28.42
  -4  -3  12  109.47   21.21
  -4  -3  12  126.89   18.76
  -4  -3  11  220.23   25.32
  -4  -3  11  132.64   19.43
  -4  -3  10 1031.82   58.70
  -4  -3  10 1283.96   59.61
  -4  -3   9  114.13   20.42
  -4  -3   9  235.74   24.30
  -4  -3   8    8.77    4.60
  -4  -3   8    6.17    3.85
  -4  -3   7 1494.16   76.86
  -4  -3   7 1721.67   57.87
  -4  -3   6 1182.51   44.67
   4   3  -6 1003.25   39.62
  -4  -3   6 1183.71   69.23
  -4  -3   5   22.79    5.93
   4   3  -5   19.89    6.67
   4   3  -5   27.09    6.32
  -4  -3   4   -0.37    0.89
   4   3  -4    2.27    3.14
   4   3  -4    2.17    2.22
  -4  -3   3  550.21   26.82
   4   3  -3  531.32   27.14
  -4  -3   2    2.33    1.37
   4   3  -2    4.08    4.28
   4   3  -2    0.52    0.72
  -4  -3   1  839.52   32.72
  -4  -3   1  776.84   37.61
  -4  -3   1  853.81   40.76
   4   3  -1  765.59   35.11
   4   3  -1  753.03   52.85
  -4  -3   0    6.22    2.74
  -4  -3   0    4.99    3.50
  -4  -3   0   12.09    5.11
  -4  -3  -1   81.20   14.17
  -4  -3  -1  153.92   19.75
  -4  -3  -2  529.88   38.68
  -4  -3  -2 1235.67   60.44
  -4  -3  -3  186.39   24.00
  -4  -3  -3  918.37   57.21
  -4  -3  -4   48.58   12.29
  -4  -3  -4   32.93   11.47
  -4  -3  -5   88.19   13.63
  -4  -3  -5   85.50   14.64
  -4  -3  -6  484.17   28.25
  -4  -3  -6  556.74   32.86
  -4  -3  -7  206.32   15.91
  -4  -3  -7  253.27   18.66
  -4  -3  -7  225.32   25.39
  -4  -3  -8   34.65    5.35
  -4  -3  -8   45.52    9.73
  -4  -3  -9   18.21    4.90
   4   4 -15  587.99   23.65
  -4  -4  15  546.49   22.95
  -4  -4  15  605.55   24.95
   4   4 -14  206.46   17.74
  -4  -4  14  181.09   16.47
  -4  -4  14  202.88   17.99
  -4  -4  13  159.70   19.51
   4   4 -13  120.40   16.16
  -4  -4  13  134.04   16.23
  -4  -4  13  133.07   17.19
  -4  -4  12  119.18   21.12
  -4  -4  12  135.34   18.96
  -4  -4  11  182.87   23.35
  -4  -4  11  172.29   22.07
  -4  -4  10   11.25    5.73
  -4  -4  10    0.51    2.57
  -4  -4   9  109.87   20.09
  -4  -4   9  204.55   21.65
  -4  -4   8  440.86   41.24
  -4  -4   8  667.93   37.36
  -4  -4   7  170.13   26.41
  -4  -4   7  174.80   18.64
  -4  -4   6  424.61   28.10
  -4  -4   6  488.48   44.86
  -4  -4   5   35.38    8.05
  -4  -4   5   28.56    6.11
  -4  -4   5   37.94   12.82
  -4  -4   4   10.76    4.66
  -4  -4   4    8.97    3.54
  -4  -4   4   19.95   10.09
  -4  -4   3 1216.49   45.44
  -4  -4   3 1189.18   42.97
  -4  -4   2  389.82   26.88
  -4  -4   2  394.88   26.40
  -4  -4   1   47.26   10.05
  -4  -4   1   47.26   10.01
  -4  -4   1   51.04   10.48
  -4  -4   0  475.75   32.07
  -4  -4   0  450.87   32.97
  -4  -4  -1  889.37   49.45
  -4  -4  -1 1441.51   63.73
  -4  -4  -2    1.83    1.81
  -4  -4  -2   15.85    8.00
  -4  -4  -3    2.52    2.54
  -4  -4  -3    9.78    6.47
  -4  -4  -4  146.54   20.13
  -4  -4  -4   55.85   14.84
  -4  -4  -5   57.42   10.30
  -4  -4  -5   64.37   12.12
  -4  -4  -6  145.60   14.17
  -4  -4  -6  176.33   17.01
  -4  -4  -6  138.07   20.22
  -4  -4  -7   46.43    6.75
  -4  -4  -7   54.02    7.68
  -4  -4  -7   42.04    9.41
  -4  -4  -8   10.77    2.59
  -4  -4  -8   13.63    4.34
  -4  -5  15    2.77    1.53
   4   5 -15    3.23    1.92
  -4  -5  15    0.97    1.09
   4   5 -14  754.12   32.72
  -4  -5  14  748.47   30.99
  -4  -5  14  814.75   33.14
   4   5 -13  139.10   16.64
  -4  -5  13  156.62   16.90
  -4  -5  13  156.94   17.48
  -4  -5  12  514.89   34.52
  -4  -5  12  346.13   29.24
  -4  -5  11    1.08    2.13
  -4  -5  11    1.37    1.87
  -4  -5  10   35.53    9.44
  -4  -5  10   13.56    6.01
  -4  -5   9  220.63   28.19
  -4  -5   9  291.18   25.97
  -4  -5   8 1024.15   63.36
  -4  -5   8 1202.58   50.39
  -4  -5   7  101.75   14.14
  -4  -5   7   83.24   18.45
  -4  -5   6    3.65    3.39
  -4  -5   6    4.13    3.85
  -4  -5   5  924.01   40.75
  -4  -5   5  878.80   34.73
  -4  -5   4  844.29   39.98
  -4  -5   4  861.32   35.98
  -4  -5   3   62.32   10.91
  -4  -5   3   72.34   11.11
  -4  -5   2   84.44   13.48
  -4  -5   2   96.90   13.66
  -4  -5   1  447.06   31.37
  -4  -5   1  466.99   32.15
  -4  -5   0    1.18    1.56
  -4  -5   0   13.65    5.87
  -4  -5   0    9.24    5.97
  -4  -5  -1  369.73   30.73
  -4  -5  -1  274.42   27.97
  -4  -5  -2   -0.74    3.37
  -4  -5  -2    7.97    6.02
  -4  -5  -3    2.45    2.98
  -4  -5  -3    2.24    3.29
  -4  -5  -4  848.95   44.89
  -4  -5  -4  211.54   26.52
  -4  -5  -5  521.86   28.69
  -4  -5  -5  517.04   27.66
  -4  -5  -5  555.12   31.71
  -4  -5  -6   17.64    4.39
  -4  -5  -6   23.39    5.30
  -4  -5  -6   11.95    4.86
  -4  -5  -7  114.83    8.71
  -4  -5  -7  138.68   10.02
  -4  -5  -7  133.76   13.20
   4   6 -14  855.39   31.92
  -4  -6  14  828.88   29.38
  -4  -6  14  930.75   30.90
   4   6 -13  202.93   18.77
  -4  -6  13  258.15   20.15
  -4  -6  13  255.69   20.28
  -4  -6  12   12.38    5.08
  -4  -6  12   23.42    7.07
  -4  -6  11   45.66   11.09
  -4  -6  11   66.71   12.51
  -4  -6  10  517.71   40.99
  -4  -6  10  959.94   46.26
  -4  -6   9   57.66   14.53
  -4  -6   9  111.88   15.57
  -4  -6   8    0.84    1.85
  -4  -6   8    5.98    3.63
  -4  -6   7  319.53   36.50
  -4  -6   7  291.08   24.20
  -4  -6   6  425.57   28.55
  -4  -6   6  531.20   48.42
  -4  -6   5  191.76   19.14
  -4  -6   5  188.13   30.62
  -4  -6   4  303.37   24.46
  -4  -6   4  322.22   22.01
  -4  -6   4  377.91   44.95
  -4  -6   3   46.44   10.19
  -4  -6   3   41.93    8.49
  -4  -6   2   29.76    8.23
  -4  -6   2   28.27    7.53
  -4  -6   1 1002.13   48.59
  -4  -6   1  984.51   47.19
  -4  -6   0  443.79   33.26
  -4  -6   0  391.07   31.52
  -4  -6  -1    1.56    1.65
  -4  -6  -1    3.04    1.47
  -4  -6  -2   82.77   14.38
  -4  -6  -2   56.39   12.34
  -4  -6  -3  257.74   23.44
  -4  -6  -3  370.22   29.33
  -4  -6  -4   66.32   10.52
  -4  -6  -4   64.71    9.85
  -4  -6  -4   63.24   10.91
  -4  -6  -5    9.31    3.30
  -4  -6  -5    6.33    2.47
  -4  -6  -5    7.57    2.99
  -4  -6  -6  245.37   12.78
  -4  -6  -6  288.85   14.88
  -4  -7  13    3.93    2.75
   4   7 -13    1.74    0.92
  -4  -7  13    1.30    2.11
  -4  -7  12  363.75   25.31
  -4  -7  12  254.15   20.64
  -4  -7  11    8.05    3.95
  -4  -7  11    5.13    2.76
  -4  -7  10  182.41   23.15
  -4  -7  10  325.21   25.61
  -4  -7   9   29.02   10.00
  -4  -7   9   53.06   10.21
  -4  -7   8   42.48    9.05
  -4  -7   8   35.85   12.01
  -4  -7   7  525.20   47.40
  -4  -7   7  497.65   30.80
  -4  -7   6 1153.70   47.57
  -4  -7   6 1283.82   77.68
  -4  -7   5   51.54   10.04
  -4  -7   5   64.51   18.74
  -4  -7   4   28.20    7.86
  -4  -7   4   18.18   11.81
  -4  -7   3 1137.42   49.30
  -4  -7   3 1110.55   42.09
  -4  -7   2  225.05   22.49
  -4  -7   2  226.97   20.41
  -4  -7   1   33.68    8.68
  -4  -7   1   20.86    6.77
  -4  -7   1   33.38    8.43
  -4  -7   0   16.41    6.35
  -4  -7   0    4.00    2.49
  -4  -7   0   19.71    6.72
  -4  -7  -1   77.65   13.42
  -4  -7  -1   77.48   13.28
  -4  -7  -2   -0.01    1.45
  -4  -7  -2    0.45    2.24
  -4  -7  -3  288.97   21.19
  -4  -7  -3  347.33   21.91
  -4  -7  -3  301.47   22.31
  -4  -7  -4    8.82    3.11
  -4  -7  -4    6.91    2.39
  -4  -7  -4    7.84    3.18
  -4  -8  12  524.95   26.30
  -4  -8  11   58.37   10.61
  -4  -8  11   39.68    7.89
  -4  -8  10    3.15    1.92
  -4  -8  10   -1.81    3.95
  -4  -8   9  460.45   37.94
  -4  -8   9  666.67   34.30
  -4  -8   8  839.01   55.55
  -4  -8   8  942.32   41.06
  -4  -8   7   25.26    6.86
  -4  -8   7   22.70   10.78
  -4  -8   6   28.92    7.36
  -4  -8   6   27.14   12.23
  -4  -8   5  350.15   25.98
  -4  -8   5  354.71   45.96
  -4  -8   4  117.22   15.33
  -4  -8   4   80.84   23.23
  -4  -8   3  203.90   20.66
  -4  -8   3   74.21   22.67
  -4  -8   2  127.58   16.49
  -4  -8   2  116.69   13.25
  -4  -8   1   16.32    6.24
  -4  -8   1   16.44    5.30
  -4  -8   0   42.43    9.33
  -4  -8   0   37.57    7.73
  -4  -8   0   56.71    9.87
  -4  -8  -1  273.18   21.97
  -4  -8  -1  181.50   17.02
  -4  -8  -2  152.45   14.33
  -4  -8  -2  177.22   13.91
  -4  -8  -2  130.92   12.95
  -4  -9  10  217.27   21.04
  -4  -9   9    1.27    0.46
  -4  -9   9   -3.13    4.62
  -4  -9   8  330.45   34.69
  -4  -9   8  448.67   27.33
  -4  -9   7    1.60    1.40
  -4  -9   7    2.01    4.43
  -4  -9   6   17.13    5.68
  -4  -9   6   15.52    9.47
  -4  -9   5  321.02   47.05
  -4  -9   5  506.78   30.26
  -4  -9   4  291.27   23.27
  -4  -9   4  142.29   31.78
  -4  -9   3    3.81    3.01
  -4  -9   2   53.05   10.00
   4   9  -2   55.33    9.98
  -4  -9   1  219.05   19.40
  -5  12   3  127.34   17.95
  -5  12   2   98.20   16.00
  -5  12   1  188.17   41.87
  -5  12   1  106.34   15.92
  -5  12   0 1657.95  156.61
  -5  12   0  947.01   44.54
  -5  12  -1   33.08   20.51
  -5  12  -2    6.15    3.82
  -5  12  -3  706.66   71.23
  -5  12  -4  338.45   30.20
  -5  12  -4  496.10   51.09
  -5  12  -5   54.72   11.75
  -5  11   6  880.49   38.75
  -5  11   5  125.56   17.29
  -5  11   4    2.94    0.92
  -5  11   3 1191.28   69.36
  -5  11   3  530.30   39.24
  -5  11   2 1263.20   91.22
  -5  11   2 1781.99  128.15
  -5  11   1    4.56    8.80
  -5  11   1    3.54    9.11
  -5  11   1    4.90    2.71
  -5  11   0  130.25   17.95
  -5  11   0  146.56   35.93
  -5  11   0  147.41   44.38
  -5  11   0  160.96   18.32
  -5  11  -1   87.18   14.46
  -5  11  -1   91.17   23.99
  -5  11  -1  102.01   34.86
  -5  11  -1   99.14   13.26
  -5  11  -2  183.90   22.11
  -5  11  -2  160.44   19.36
  -5  11  -2  165.18   24.59
  -5  11  -2  221.16   44.31
  -5  11  -3  530.96   37.76
  -5  11  -3  454.56   32.79
  -5  11  -3  526.53   60.87
  -5  11  -4  250.56   26.17
  -5  11  -4  210.66   22.32
  -5  11  -4  249.17   36.73
  -5  11  -5    2.71    2.87
  -5  11  -5    4.47    2.17
  -5  11  -6   35.28    9.61
  -5  11  -6   28.97    8.11
  -5  11  -7  457.43   31.30
  -5  10   8  500.88   24.62
  -5  10   7  655.17   35.05
  -5  10   6   10.21    3.83
  -5  10   6    6.02    2.88
  -5  10   5    0.84    0.60
  -5  10   5   -1.11    3.60
  -5  10   4  272.68   30.93
  -5  10   4  126.98   20.55
  -5  10   3   61.07   19.36
  -5  10   3   40.04   11.55
  -5  10   2  851.43   43.57
  -5  10   2 1654.44  121.55
  -5  10   2 1972.10  158.65
  -5  10   2  918.65   50.63
  -5  10   1   26.14    7.11
  -5  10   1   11.25   12.50
  -5  10   1   11.90   12.03
  -5  10   1   34.22    8.96
  -5  10   0   19.47    7.12
  -5  10   0    9.69    4.44
  -5  10   0   15.56   17.35
  -5  10   0    3.51   12.58
  -5  10   0   27.09    9.41
  -5  10  -1  501.40   35.09
  -5  10  -1  462.19   32.05
  -5  10  -1  438.27   55.82
  -5  10  -1  527.18   78.77
  -5  10  -2 1142.44   54.01
  -5  10  -2 1100.56   49.88
  -5  10  -2 1271.08  106.84
  -5  10  -3   47.33   11.03
  -5  10  -3   37.18    9.30
  -5  10  -3   38.33   15.68
  -5  10  -4  109.79   17.37
  -5  10  -4   98.81   15.96
  -5  10  -4  111.63   25.29
  -5  10  -5 1105.67   55.98
  -5  10  -5 1039.48   51.98
  -5  10  -5 1047.43   68.90
  -5  10  -6  126.46   18.97
  -5  10  -6  103.17   16.38
  -5  10  -7   36.96    9.80
  -5  10  -7   27.72    8.13
  -5  10  -8   32.92    8.15
  -5  10  -8   29.83    7.37
  -5  10  -8   54.54    8.46
  -5   9   9  241.65   17.52
  -5   9   8  182.44   18.91
  -5   9   7  280.73   19.49
  -5   9   7  392.31   32.19
  -5   9   6    2.63    2.59
  -5   9   6    1.24    2.55
  -5   9   5   53.53   12.85
  -5   9   5   17.96    8.01
  -5   9   4 1636.37   87.02
  -5   9   4  999.71   58.16
  -5   9   3  599.49   36.76
  -5   9   3  622.06   43.61
  -5   9   2   -1.30    2.50
  -5   9   2   13.63   14.88
  -5   9   2  -15.02   23.34
  -5   9   2    5.62    4.78
  -5   9   1  463.41   32.85
  -5   9   1  446.81   30.95
  -5   9   1  367.44   72.72
  -5   9   1  492.58   33.67
  -5   9   0 1114.81   51.06
  -5   9   0 1090.45   48.87
  -5   9   0  929.81  107.69
  -5   9   0 1209.43  132.82
  -5   9   0 1201.61   48.47
  -5   9  -1   -0.10    0.40
  -5   9  -1   -0.10    3.12
  -5   9  -1   -5.27    7.06
  -5   9  -1    2.57    6.84
  -5   9  -2   24.00    7.72
  -5   9  -2   36.74    9.29
  -5   9  -2   18.55    8.73
  -5   9  -2   28.34   15.64
  -5   9  -3  282.29   27.25
  -5   9  -3  291.27   27.24
  -5   9  -3  242.77   41.40
  -5   9  -4  140.07   19.97
  -5   9  -4  127.68   19.00
  -5   9  -4  139.91   29.56
  -5   9  -5  396.10   34.14
  -5   9  -5  390.35   33.56
  -5   9  -5  403.88   46.59
  -5   9  -6  513.91   39.36
  -5   9  -6  468.65   37.68
  -5   9  -7   62.76   13.33
  -5   9  -7   70.82   13.89
  -5   9  -8  111.36   16.54
  -5   9  -8  104.11   15.59
  -5   9  -9  969.40   41.97
  -5   9  -9  964.12   41.49
  -5   8  10  354.64   20.82
  -5   8  10  314.27   17.76
  -5   8   9 1309.76   48.94
  -5   8   9 1171.46   40.64
  -5   8   8  110.70   17.03
  -5   8   7   21.31    6.12
  -5   8   7   30.06   10.14
  -5   8   6  741.17   43.81
  -5   8   6  467.91   41.26
  -5   8   5  588.00   46.86
  -5   8   5  325.83   34.45
  -5   8   4   22.68    7.68
  -5   8   4   34.08   14.47
  -5   8   4   11.70    4.78
  -5   8   3   34.96    8.38
  -5   8   3   47.34   21.60
  -5   8   3   27.77    9.40
  -5   8   2  552.63   35.10
  -5   8   2  538.75   33.81
  -5   8   2 1022.01  121.05
  -5   8   2  903.00  126.42
  -5   8   2  608.01   38.55
  -5   8   1   58.43   11.24
  -5   8   1   55.87   10.71
  -5   8   1   43.59   30.95
  -5   8   1    8.11    6.30
  -5   8   1   58.49   11.08
  -5   8   0  255.54   23.43
  -5   8   0  253.07   23.23
  -5   8   0  235.62   56.80
  -5   8   0  307.28   66.75
  -5   8  -1   38.05    9.26
  -5   8  -1   44.26    9.99
  -5   8  -1   33.46   13.71
  -5   8  -1   47.20   20.08
  -5   8  -1   30.22   19.75
  -5   8  -2   44.30   10.31
  -5   8  -2   38.19    9.80
  -5   8  -2   25.79   12.35
  -5   8  -2   25.41   11.44
  -5   8  -2   42.10   19.16
  -5   8  -3 1048.32   51.71
  -5   8  -3 1044.82   52.56
  -5   8  -3  890.21   79.49
  -5   8  -4  814.08   47.97
  -5   8  -4  814.82   48.70
  -5   8  -5   81.38   15.76
  -5   8  -5   74.19   14.88
  -5   8  -5   32.31   10.53
  -5   8  -6  154.12   21.98
  -5   8  -6  131.65   20.93
  -5   8  -6  179.75   23.67
  -5   8  -7  185.78   23.86
  -5   8  -7  186.37   24.44
  -5   8  -8   80.67   14.84
  -5   8  -8   86.09   15.73
  -5   8  -9   32.89    8.57
  -5   8  -9   34.98    8.99
  -5   8  -9   38.02    7.63
  -5   8 -10   72.32    9.89
  -5   8 -10   78.03   10.56
  -5   8 -10   71.92    8.64
  -5   7  11  683.55   27.60
  -5   7  11  637.15   25.51
  -5   7  10   84.43   12.02
  -5   7  10   68.36    9.82
  -5   7   9   93.22   14.71
  -5   7   9   90.47   12.83
  -5   7   8  254.93   24.15
  -5   7   8  204.72   25.00
  -5   7   7  200.22   20.87
  -5   7   7  235.80   29.18
  -5   7   6  198.01   24.31
  -5   7   6  109.31   20.52
  -5   7   5  505.73   35.28
  -5   7   5  464.51   45.22
  -5   7   4   56.87   11.47
  -5   7   4   69.84   21.99
  -5   7   4   56.34   13.74
  -5   7   3   95.42   14.04
  -5   7   3   97.30   16.15
  -5   7   2 1988.38   62.94
  -5   7   2 2005.30   63.36
  -5   7   2 1939.99   75.01
  -5   7   2 2133.19   68.49
  -5   7   1  349.39   25.89
  -5   7   1  339.11   25.95
  -5   7   1  365.90   34.45
  -5   7   1  270.93   76.92
  -5   7   1  286.56   74.83
  -5   7   0  108.95   14.51
  -5   7   0  118.16   15.50
  -5   7   0  112.52   20.68
  -5   7   0   87.55   38.14
  -5   7   0   98.93   38.09
  -5   7  -1  842.02   41.36
  -5   7  -1  846.11   42.73
  -5   7  -1  859.18   60.75
  -5   7  -1  947.54  103.53
  -5   7  -2 1064.07   48.68
  -5   7  -2 1063.76   50.19
  -5   7  -2  779.81   61.87
  -5   7  -2  728.22   58.93
  -5   7  -2  932.22   90.89
  -5   7  -3   19.87    6.75
  -5   7  -3   25.03    8.08
  -5   7  -3   16.09    9.36
  -5   7  -3   45.99   21.60
  -5   7  -4   34.01    9.44
  -5   7  -4   23.71    7.46
  -5   7  -4   41.78   14.08
  -5   7  -4   11.65    6.31
  -5   7  -5  239.89   27.02
  -5   7  -5  229.75   27.58
  -5   7  -5  163.13   24.39
  -5   7  -6   37.92   10.96
  -5   7  -6   49.84   12.63
  -5   7  -6   62.66   14.52
  -5   7  -7  152.90   22.70
  -5   7  -7  138.04   21.67
  -5   7  -8    9.86    5.42
  -5   7  -8   15.57    7.43
  -5   7  -8   24.45    7.67
  -5   7  -9    7.29    4.84
  -5   7  -9    4.06    5.39
  -5   7  -9    1.97    1.73
  -5   7 -10  332.22   22.42
  -5   7 -10  330.93   23.44
  -5   7 -10  276.95   18.19
  -5   6  12   72.63    8.45
  -5   6  12   65.93    7.97
  -5   6  11  346.98   22.99
  -5   6  11  309.54   20.30
  -5   6  10   42.73    8.63
  -5   6  10   42.79    9.68
  -5   6   9   61.52   11.79
  -5   6   9   58.60   12.61
  -5   6   8  734.81   45.26
  -5   6   8  561.01   43.65
  -5   6   7  774.62   43.74
  -5   6   7  824.66   56.19
  -5   6   6   22.40    8.78
  -5   6   6   16.38    7.90
  -5   6   5   19.36    6.41
  -5   6   5   20.72    8.37
  -5   6   5   11.02    6.93
  -5   6   4 2043.37   65.18
  -5   6   4 1968.81   76.95
  -5   6   3  508.85   31.39
  -5   6   3  482.08   33.31
  -5   6   3  549.55   36.53
  -5   6   2  117.95   14.76
  -5   6   2  131.89   18.26
  -5   6   1   26.36    7.15
  -5   6   1   30.15    9.19
  -5   6   1    3.44   22.59
  -5   6   1    1.93   15.10
  -5   6   0  490.93   30.81
  -5   6   0  501.05   39.39
  -5   6   0  381.93   75.41
  -5   6   0  565.48   97.76
  -5   6  -1   24.55    6.97
  -5   6  -1   17.40    8.61
  -5   6  -1    5.81    5.29
  -5   6  -1   27.73   19.40
  -5   6  -2  688.25   40.21
  -5   6  -2  503.52   44.72
  -5   6  -2  409.92   43.88
  -5   6  -2  610.49   76.69
  -5   6  -3   -0.88    2.39
  -5   6  -3    1.11    1.11
  -5   6  -3    3.25    2.07
  -5   6  -3   -1.07    0.48
  -5   6  -4    1.60    1.28
  -5   6  -4    0.95    2.21
  -5   6  -4    2.71    5.25
  -5   6  -4   -0.53    3.50
  -5   6  -5 1497.89   68.46
  -5   6  -5 1529.18   72.76
  -5   6  -6  385.17   36.06
  -5   6  -6  382.82   37.85
  -5   6  -7   -1.29    4.05
  -5   6  -7   -3.18    6.22
  -5   6  -7    2.71    3.84
  -5   6  -8   90.01   15.94
  -5   6  -8  100.67   17.70
  -5   6  -9  869.99   44.39
  -5   6  -9  917.45   48.33
  -5   6  -9  882.46   39.06
  -5   6 -10   64.41    9.98
  -5   6 -10   65.64   10.77
  -5   6 -10   51.99    8.17
  -5   5  13 1541.47   34.23
  -5   5  13 1602.21   36.79
  -5   5  12   32.92    6.17
  -5   5  12   31.34    5.85
  -5   5  12   35.33    6.97
  -5   5  11   11.50    4.63
  -5   5  11   15.40    4.69
  -5   5  11   16.53    5.43
  -5   5  10  397.45   28.50
  -5   5  10  402.42   28.04
  -5   5  10  399.81   31.78
  -5   5   9 1531.12   63.23
  -5   5   9 1573.90   63.42
  -5   5   9 1482.93   67.74
  -5   5   8   45.81   11.87
  -5   5   8   21.12    8.24
  -5   5   8   34.31   11.92
  -5   5   7   28.24    8.59
  -5   5   7   24.59    9.64
  -5   5   7   37.46   12.40
  -5   5   6  292.82   32.51
  -5   5   6  221.11   29.01
  -5   5   5  233.76   22.29
  -5   5   5  195.16   19.42
  -5   5   5  176.18   29.46
  -5   5   5  193.33   25.56
  -5   5   4  867.39   41.04
  -5   5   4  808.65   39.53
  -5   5   4  816.04   79.13
  -5   5   4  846.67   48.41
  -5   5   3  163.07   17.01
  -5   5   3  156.35   17.46
  -5   5   3  174.17   48.85
  -5   5   3  174.53   19.70
  -5   5   2   93.23   12.64
  -5   5   2   99.84   14.87
  -5   5   2  139.93   56.74
  -5   5   1   75.38   11.46
  -5   5   1   80.20   13.82
  -5   5   1   25.91   29.48
  -5   5   1  106.39   62.82
  -5   5   0 1824.85   58.16
  -5   5   0 1794.21   69.16
  -5   5   0 1857.17  164.35
  -5   5  -1  258.61   22.71
  -5   5  -1  231.99   26.67
  -5   5  -1  203.04   39.14
  -5   5  -2    8.80    4.86
  -5   5  -2    3.63    4.13
  -5   5  -3  703.55   50.85
  -5   5  -3  660.84   48.76
  -5   5  -4 1025.57   56.89
  -5   5  -4  743.02   51.85
  -5   5  -5   98.80   17.41
  -5   5  -5  104.23   19.19
  -5   5  -5  114.06   18.90
  -5   5  -5   85.05   18.89
  -5   5  -6    4.26    4.56
  -5   5  -6    1.47    2.11
  -5   5  -6   11.09    7.18
  -5   5  -7   95.30   18.27
  -5   5  -7   94.11   19.22
  -5   5  -8   12.96    5.87
  -5   5  -8    9.82    4.03
  -5   5  -8   19.96    6.84
  -5   5  -9  290.79   25.07
  -5   5  -9  295.00   26.90
  -5   5  -9  262.28   21.48
  -5   5 -10  282.37   20.17
  -5   5 -10  298.23   22.06
  -5   5 -10  241.67   17.51
  -5   4  14  441.36   17.64
  -5   4  13   16.11    4.17
  -5   4  13   17.91    4.23
  -5   4  13   20.09    4.49
  -5   4  12    6.51    2.82
  -5   4  12    4.56    2.41
  -5   4  12    7.97    3.26
  -5   4  11  659.18   35.19
  -5   4  11  635.86   35.24
  -5   4  11  669.31   37.75
  -5   4  11  706.05   38.78
  -5   4  10   -0.36    2.12
  -5   4  10   11.58    6.19
  -5   4  10    5.14    5.19
  -5   4  10    6.96    5.66
  -5   4   9  650.05   43.78
  -5   4   9  654.80   45.62
  -5   4   9  677.79   46.47
  -5   4   9  680.81   47.83
  -5   4   8    6.12    7.36
  -5   4   8    3.39    0.76
  -5   4   7    0.66    2.29
  -5   4   7   -0.53    1.59
  -5   4   6  693.97   50.77
  -5   4   5 1540.77   54.76
  -5   4   5 1412.37   48.74
  -5   4   4   11.47    4.05
  -5   4   4   12.36    4.41
  -5   4   4    8.13    6.02
  -5   4   3  266.17   20.84
  -5   4   3  243.50   20.54
  -5   4   2 2411.34   66.68
  -5   4   2 1825.24  201.99
  -5   4   1  555.02   33.99
  -5   4   1  583.84   37.21
   5  -4  -1  523.62   31.97
  -5   4   0  257.17   20.99
  -5   4   0  248.60   24.41
  -5   4   0  330.13   66.86
  -5   4   0  257.09   24.84
   5  -4   0  232.71   23.91
  -5   4  -1  118.22   15.10
  -5   4  -1  113.27   17.77
  -5   4  -1  106.79   26.69
  -5   4  -2  298.65   30.92
  -5   4  -2  348.85   32.89
  -5   4  -3   23.14    8.76
  -5   4  -3   24.42    9.88
  -5   4  -4 1597.79   70.40
  -5   4  -4 1110.80   60.18
  -5   4  -5   28.12    9.87
  -5   4  -5   29.53    9.12
  -5   4  -5   27.60   11.11
  -5   4  -6   91.23   14.51
  -5   4  -6   72.27   15.92
  -5   4  -7  481.59   42.89
  -5   4  -7 1244.79   59.81
  -5   4  -8  349.10   30.35
  -5   4  -8  366.78   33.67
  -5   4  -8  397.16   30.44
  -5   4  -9    4.65    3.36
  -5   4  -9    2.98    1.91
  -5   4  -9    3.65    3.17
  -5   4 -10  537.52   28.25
  -5   4 -10  419.97   22.15
  -5   3  14  229.58   14.09
  -5   3  14  243.39   14.66
  -5   3  14  250.31   14.25
  -5   3  13   22.21    5.48
  -5   3  13   17.20    4.75
  -5   3  13   16.84    4.65
  -5   3  13   24.38    5.46
  -5   3  12  117.09   14.16
  -5   3  12  134.32   15.36
  -5   3  12  122.11   15.16
  -5   3  12  131.95   15.21
  -5   3  11  991.81   45.78
  -5   3  11 1047.19   50.33
  -5   3  11 1007.35   48.35
  -5   3  10  287.94   30.84
  -5   3  10  376.25   32.44
  -5   3   9   11.36    6.69
  -5   3   9   17.74    7.27
  -5   3   8  709.68   54.17
  -5   3   8 1360.47   73.31
  -5   3   7  586.12   41.04
  -5   3   7  726.14   57.94
  -5   3   6    5.92    4.43
  -5   3   5    0.50    3.49
  -5   3   4  445.05   60.99
   5  -3  -4  444.04   26.50
   5  -3  -3   58.58    9.47
  -5   3   3   75.70   12.10
   5  -3  -3   80.18   10.84
  -5   3   2  635.72   34.29
   5  -3  -2  549.72   30.31
  -5   3   1  211.24   19.61
   5  -3  -1  197.44   20.10
  -5   3   0   27.47    8.28
   5  -3   0   30.47    8.76
  -5   3   0   29.44    7.72
  -5   3  -1 1067.06   53.55
  -5   3  -1 1178.04   54.57
  -5   3  -2 1316.31   63.09
  -5   3  -2 1692.21   73.94
  -5   3  -3   17.51    7.26
  -5   3  -3   21.89    9.52
  -5   3  -4   57.15   13.09
  -5   3  -4   38.41   11.04
  -5   3  -4   14.95   10.60
  -5   3  -5 1242.60   58.28
  -5   3  -5 1029.34   63.79
  -5   3  -6  721.97   39.95
  -5   3  -6  687.23   48.18
  -5   3  -7    4.42    3.21
  -5   3  -7    2.22    2.82
  -5   3  -8   83.21   14.83
  -5   3  -8   67.08   12.17
  -5   3  -9  531.80   32.20
  -5   3  -9  391.70   24.51
  -5   3 -10   65.69    8.33
  -5   2  14  155.84   12.61
  -5   2  14  148.52   12.79
  -5   2  14  149.40   12.75
  -5   2  14  161.38   12.52
  -5   2  13 1011.03   38.87
  -5   2  13 1080.30   42.15
  -5   2  13  984.66   38.35
  -5   2  13 1074.17   39.17
  -5   2  12  389.40   27.40
  -5   2  12  502.91   33.22
  -5   2  12  449.46   29.22
  -5   2  11   51.29   13.18
  -5   2  11   45.03   10.20
  -5   2  11   48.68   10.31
  -5   2  10  249.72   26.92
  -5   2  10  219.28   23.47
  -5   2   9  541.50   43.38
  -5   2   9  447.34   37.97
  -5   2   8   34.84    8.86
  -5   2   8  161.67   26.85
  -5   2   7  283.58   28.85
  -5   2   7 1035.84   72.72
  -5   2   6    0.84    2.05
  -5   2   5  248.15   21.85
  -5   2   5  256.18   23.07
  -5   2   4 1590.64   54.91
   5  -2  -4 1451.90   45.15
  -5   2   3 1022.74   42.57
   5  -2  -3  909.61   38.09
  -5   2   2   91.74   12.24
   5  -2  -2   85.06   12.56
  -5   2   1  271.76   21.00
   5  -2  -1  286.85   25.35
  -5   2   0 1570.81   59.26
   5  -2   0 1703.22   69.14
  -5   2  -1   26.55    8.13
  -5   2  -1   40.31   10.49
  -5   2  -2   10.46    5.09
  -5   2  -2   18.31    8.27
  -5   2  -3  113.75   18.82
  -5   2  -3  102.21   20.38
  -5   2  -4  227.58   25.85
  -5   2  -4  129.65   22.65
  -5   2  -5  510.87   36.33
  -5   2  -5  433.74   40.24
  -5   2  -6  314.11   25.40
  -5   2  -6  281.40   30.26
  -5   2  -7    4.32    2.99
  -5   2  -7    5.84    4.33
  -5   2  -8   20.45    6.41
  -5   2  -9  810.72   33.22
  -5   1  15  233.91   12.79
  -5   1  15  235.80   13.72
  -5   1  15  211.98   12.78
  -5   1  14  115.39   11.61
  -5   1  14  123.97   12.70
  -5   1  14  112.25   11.53
  -5   1  13  225.04   19.15
  -5   1  13  266.91   23.05
  -5   1  13  244.44   19.69
  -5   1  12  418.01   33.87
  -5   1  12  388.59   27.83
  -5   1  12  397.44   26.97
  -5   1  11  224.38   23.65
  -5   1  11  214.43   22.32
  -5   1  10   52.20   12.52
  -5   1  10   63.36   14.21
  -5   1   9 3360.90  111.11
  -5   1   9 2233.82   85.01
  -5   1   8   89.64   14.56
  -5   1   8  167.18   24.46
  -5   1   7   43.11   16.15
  -5   1   6 1467.02   51.94
  -5   1   5 1098.05   43.72
  -5   1   4    1.68    1.39
  -5   1   4    5.35    3.51
   5  -1  -4    2.89    1.97
  -5   1   3    3.61    2.57
   5  -1  -3    2.73    1.78
  -5   1   2  859.68   36.79
   5  -1  -2  818.80   31.44
   5  -1  -1   28.17    8.61
   5  -1  -1   25.55    5.84
  -5   1   0  481.44   33.26
  -5   1   0  547.42   35.66
  -5   1   0  541.08   34.32
   5  -1   0  509.93   27.31
  -5   1  -1    7.17    4.74
  -5   1  -1    9.33    6.11
  -5   1  -1   12.01    5.60
  -5   1  -2   -0.01    2.92
  -5   1  -2    4.04    4.81
  -5   1  -2    4.06    3.72
  -5   1  -3  417.30   35.64
  -5   1  -3  215.96   29.00
  -5   1  -4  987.89   52.94
  -5   1  -4  593.87   48.55
  -5   1  -5   32.36    8.71
  -5   1  -5   34.83   11.31
  -5   1  -6   18.46    6.18
  -5   1  -6   14.11    6.69
  -5   1  -6    1.16    3.35
  -5   1  -7 1496.61   46.36
  -5   1  -7 1480.77   59.51
  -5   1  -8  578.09   31.25
  -5   1  -8  642.84   37.78
  -5   1  -9   90.32   11.90
  -5   0  15  707.33   22.71
  -5   0  15  709.87   25.13
  -5   0  15  677.76   23.89
  -5   0  15  702.22   22.89
  -5   0  14  765.08   30.95
  -5   0  14  835.33   35.21
  -5   0  14  731.58   29.88
  -5   0  13   12.93    5.21
  -5   0  13   21.13    7.37
  -5   0  13    8.08    3.35
  -5   0  12   69.84   15.51
  -5   0  12   75.31   12.40
  -5   0  12   75.20   12.23
  -5   0  11 1538.63   62.76
  -5   0  11 1309.28   56.91
  -5   0  10  348.61   33.35
  -5   0  10  235.33   26.18
  -5   0   9    7.37    4.20
  -5   0   9   19.98    8.90
  -5   0   8   59.58   13.79
  -5   0   8  219.79   33.15
  -5   0   7  549.44   31.80
  -5   0   7  395.73   35.14
  -5   0   6  347.20   24.47
  -5   0   5  631.97   32.24
  -5   0   4  160.73   16.21
   5   0  -4  147.49   13.93
  -5   0   3   46.50    9.05
   5   0  -3   42.56    7.44
  -5   0   2 1279.95   45.87
   5   0  -2 1238.86   41.23
  -5   0   1  491.35   31.53
  -5   0   1  579.91   34.10
  -5   0   0    4.60    3.76
  -5   0   0    2.68    3.24
  -5   0   0    4.22    3.27
  -5   0  -1  301.93   30.67
  -5   0  -1  246.03   24.85
  -5   0  -2  544.12   44.79
  -5   0  -2  494.26   36.34
  -5   0  -3   54.24   12.82
  -5   0  -3    8.44    5.78
  -5   0  -3   73.50   15.21
  -5   0  -3   21.26    7.63
  -5   0  -4    4.38    2.99
  -5   0  -4    0.21    2.76
  -5   0  -4    2.74    3.31
  -5   0  -5  228.91   22.55
  -5   0  -5  217.61   27.48
  -5   0  -6   27.43    6.89
  -5   0  -6   17.68    7.10
  -5   0  -6    6.44    5.46
  -5   0  -7   30.88    6.22
  -5   0  -7   30.10    9.06
  -5   0  -8   21.39    6.65
  -5   0  -9    1.52    1.71
  -5  -1  15   27.57    5.04
  -5  -1  15   26.76    4.74
  -5  -1  14    6.89    3.31
  -5  -1  14    5.03    2.46
  -5  -1  14   12.13    5.30
  -5  -1  14    6.21    2.65
  -5  -1  13  559.03   36.73
  -5  -1  13  499.49   28.79
  -5  -1  13  507.76   29.16
  -5  -1  12   80.25   17.21
  -5  -1  12  124.65   16.07
  -5  -1  12  112.39   15.49
  -5  -1  11  301.24   28.31
  -5  -1  11  209.29   23.61
  -5  -1  10   14.64    6.22
  -5  -1  10   41.13   11.93
  -5  -1   9   45.11   11.64
  -5  -1   9  136.53   23.83
  -5  -1   8  179.62   18.15
  -5  -1   8  122.71   19.12
  -5  -1   7 1788.02   55.46
  -5  -1   7 1615.46   65.39
  -5  -1   6   34.53    8.88
  -5  -1   6   32.32    7.38
  -5  -1   5    0.85    0.59
  -5  -1   4 1667.75   52.48
  -5  -1   3 1472.80   50.67
  -5  -1   2    9.86    4.05
  -5  -1   2   18.76    6.27
  -5  -1   1   64.24   11.80
  -5  -1   1   92.43   14.12
  -5  -1   1   79.83   12.28
  -5  -1   0  403.57   30.94
  -5  -1   0  444.46   31.06
  -5  -1  -1    1.56    2.55
  -5  -1  -1    5.53    4.19
  -5  -1  -1    9.07    5.16
  -5  -1  -2  174.55   23.08
  -5  -1  -2  191.92   23.31
  -5  -1  -3   19.77    7.58
  -5  -1  -3    5.16    2.74
  -5  -1  -3   10.41    6.52
  -5  -1  -4   14.59    5.87
  -5  -1  -4   10.88    5.10
  -5  -1  -4    4.95    4.08
  -5  -1  -5  343.59   26.33
  -5  -1  -5  324.74   24.99
  -5  -1  -6  931.59   37.76
  -5  -1  -6  619.74   43.02
  -5  -1  -7    6.09    2.45
  -5  -1  -7    4.14    3.53
  -5  -1  -8  267.11   13.44
  -5  -1  -8  289.03   21.03
  -5  -2  15   16.56    3.68
  -5  -2  14    2.51    2.36
  -5  -2  14   -0.27    1.72
  -5  -2  14    4.24    3.30
  -5  -2  14    0.15    0.71
  -5  -2  13  578.59   37.82
  -5  -2  13  578.25   30.56
  -5  -2  13  602.61   32.00
  -5  -2  12  493.42   32.16
  -5  -2  12  448.16   31.51
  -5  -2  11   17.14    7.19
  -5  -2  11   42.90   11.39
  -5  -2  10  272.91   30.07
  -5  -2  10   98.14   16.64
  -5  -2   9 1171.31   69.67
  -5  -2   9  753.69   45.88
  -5  -2   8  316.16   23.63
  -5  -2   8  332.51   41.45
  -5  -2   8  250.61   25.44
  -5  -2   7    5.79    3.38
  -5  -2   7    5.73    3.25
  -5  -2   7   -0.07    3.77
  -5  -2   6   35.14    9.42
  -5  -2   6   39.11    7.87
  -5  -2   5  446.18   26.95
  -5  -2   5  469.44   31.52
  -5  -2   4  135.67   16.50
  -5  -2   4  115.57   13.99
  -5  -2   3  344.84   24.91
  -5  -2   2  215.00   19.87
  -5  -2   2  232.49   21.68
  -5  -2   1  120.99   16.75
  -5  -2   1  155.22   18.80
  -5  -2   0 1098.90   52.49
  -5  -2   0 1335.51   55.97
  -5  -2  -1   73.44   14.76
  -5  -2  -1  134.79   19.47
  -5  -2  -2    2.03    1.77
  -5  -2  -2   -4.86    3.67
  -5  -2  -2    7.30    5.26
  -5  -2  -3  235.33   25.40
  -5  -2  -3  349.93   34.86
  -5  -2  -4 1041.02   48.49
  -5  -2  -4  908.15   46.03
  -5  -2  -5   21.80    6.04
  -5  -2  -5   23.81    6.24
  -5  -2  -6    1.09    1.09
  -5  -2  -6   -0.10    3.81
  -5  -2  -7  173.01   12.18
  -5  -2  -7  173.27   17.43
  -5  -2  -8   11.88    3.71
  -5  -3  14  596.82   24.25
  -5  -3  14  605.79   28.66
  -5  -3  14  633.06   26.44
  -5  -3  14  688.80   28.35
  -5  -3  13   35.41    7.39
  -5  -3  13   31.59    8.80
  -5  -3  13   35.31    7.21
  -5  -3  12  174.77   19.12
  -5  -3  12  125.37   16.54
  -5  -3  11  653.85   41.58
  -5  -3  11  304.95   27.72
  -5  -3  10    1.60    2.51
  -5  -3  10    5.00    6.21
  -5  -3   9  348.45   38.31
  -5  -3   9  342.39   29.79
  -5  -3   8    1.87    2.37
  -5  -3   8    7.26    3.26
  -5  -3   8   -1.72    5.44
  -5  -3   7   79.04   11.20
  -5  -3   7   78.99   13.57
  -5  -3   6 1106.37   41.75
  -5  -3   6 1087.70   49.12
  -5  -3   5 1323.58   52.61
  -5  -3   5 1192.10   44.04
  -5  -3   4   40.27    9.97
  -5  -3   4   42.23    8.68
  -5  -3   3   90.99   14.27
  -5  -3   3   98.66   13.70
  -5  -3   2 1415.49   52.49
  -5  -3   2 1511.79   56.13
  -5  -3   1  229.43   23.45
  -5  -3   1  323.38   27.75
  -5  -3   0   31.51    9.57
  -5  -3   0   62.65   13.20
  -5  -3   0   67.93   13.40
  -5  -3  -1    3.49    2.80
  -5  -3  -1   15.50    6.71
  -5  -3  -2  285.71   28.40
  -5  -3  -2  322.34   32.49
  -5  -3  -3   55.07   12.00
  -5  -3  -3   42.95   12.06
  -5  -3  -4  370.43   26.79
  -5  -3  -4  350.50   26.96
  -5  -3  -5   13.52    4.38
  -5  -3  -5   11.09    4.17
  -5  -3  -5    7.36    3.85
  -5  -3  -6    4.96    2.13
  -5  -3  -6    6.67    2.46
  -5  -3  -6    3.11    2.30
  -5  -3  -7  507.28   24.55
  -5  -4  14  184.88   13.51
  -5  -4  14  193.05   14.02
  -5  -4  13   10.61    4.66
  -5  -4  13    5.38    2.93
   5   4 -13    6.75    2.79
  -5  -4  13    8.03    3.26
  -5  -4  12    3.26    3.25
  -5  -4  12   -1.67    4.59
  -5  -4  12    6.46    4.31
  -5  -4  11  652.93   40.98
  -5  -4  11  264.21   25.02
  -5  -4  10  312.13   31.99
  -5  -4  10  211.79   22.94
  -5  -4   9    9.77    4.55
  -5  -4   9    1.87    0.94
  -5  -4   8  342.94   42.15
  -5  -4   8  529.94   34.95
  -5  -4   7  997.57   38.58
  -5  -4   7  980.10   46.61
  -5  -4   6    5.87    4.71
  -5  -4   6    8.76    3.96
  -5  -4   6    7.27    3.90
  -5  -4   5  101.28   14.93
  -5  -4   5   94.77   12.40
  -5  -4   4  553.39   34.72
  -5  -4   4  554.86   31.05
  -5  -4   3  270.68   24.41
  -5  -4   3  259.93   22.38
  -5  -4   2  159.31   19.34
  -5  -4   2  131.93   16.23
  -5  -4   2  152.89   18.19
  -5  -4   1  163.41   19.84
  -5  -4   1  106.25   16.10
  -5  -4   1  175.30   20.78
  -5  -4   0    6.77    3.94
  -5  -4   0    1.33    1.99
  -5  -4  -1   60.17   12.80
  -5  -4  -1   68.20   14.07
  -5  -4  -2  319.24   29.20
  -5  -4  -2  621.65   43.72
  -5  -4  -3  120.12   15.51
  -5  -4  -3   89.44   14.09
  -5  -4  -4    4.38    2.44
  -5  -4  -4    3.05    1.50
  -5  -4  -4   -2.20    5.02
  -5  -4  -5  481.70   22.64
  -5  -4  -5  527.51   24.21
  -5  -4  -6  417.38   16.76
  -5  -5  13  802.80   31.47
  -5  -5  13  781.96   31.70
  -5  -5  12  190.37   19.95
  -5  -5  12  242.75   20.61
  -5  -5  11   -3.31    4.08
  -5  -5  11    2.44    1.87
  -5  -5  10    2.80    3.01
  -5  -5  10    1.58    0.77
  -5  -5   9  258.95   32.03
  -5  -5   9  361.57   28.24
  -5  -5   8    5.12    3.18
  -5  -5   8    0.39    5.81
  -5  -5   7  324.03   46.02
  -5  -5   7  439.50   30.68
  -5  -5   6    6.91    4.13
  -5  -5   6    3.42    1.34
  -5  -5   6   11.29    9.30
  -5  -5   5   12.76    6.13
  -5  -5   5   17.96    5.29
  -5  -5   4  494.52   33.24
  -5  -5   4  465.70   27.95
  -5  -5   3 1324.31   55.42
  -5  -5   3 1319.87   49.63
  -5  -5   2   43.61   10.65
  -5  -5   2   48.23   10.36
  -5  -5   1   13.37    5.91
  -5  -5   1   11.67    4.66
  -5  -5   1   18.75    7.11
  -5  -5   0  272.56   25.58
  -5  -5   0  333.31   28.99
  -5  -5  -1   27.28    7.74
  -5  -5  -1   28.31    8.18
  -5  -5  -2   38.28    8.72
  -5  -5  -2   14.78    5.46
  -5  -5  -3   93.43   12.04
  -5  -5  -3   90.28   12.49
  -5  -5  -4  281.29   17.35
  -5  -5  -4  296.23   18.73
  -5  -6  12  111.87   12.84
  -5  -6  12   74.22   10.27
  -5  -6  11   13.73    4.63
  -5  -6  11   48.61   10.07
  -5  -6  10    3.01    2.50
  -5  -6  10    1.69    0.92
  -5  -6   9  417.24   39.79
  -5  -6   9  535.70   33.01
  -5  -6   8  142.87   27.21
  -5  -6   8  244.18   22.47
  -5  -6   7   13.73    5.70
  -5  -6   7    7.92    6.98
  -5  -6   6  516.46   66.81
  -5  -6   6  628.30   36.52
  -5  -6   5  511.88   33.44
  -5  -6   5  453.53   25.21
  -5  -6   4   22.87    7.12
  -5  -6   4   21.83    5.80
  -5  -6   3  395.91   30.56
  -5  -6   3  437.91   27.61
  -5  -6   2  234.55   23.50
  -5  -6   2  252.35   21.86
  -5  -6   1   16.51    6.44
  -5  -6   1    8.82    4.11
  -5  -6   1   19.48    6.56
  -5  -6   0   27.25    7.73
  -5  -6   0   29.98    7.51
  -5  -6   0   50.51   10.32
  -5  -6  -1    6.33    3.20
  -5  -6  -1    8.62    3.66
  -5  -6  -1    1.44    1.77
  -5  -6  -2   33.75    6.80
  -5  -6  -2   24.18    6.11
  -5  -6  -3  125.11   10.85
  -5  -6  -3  118.99   11.52
  -5  -7  11  699.20   33.96
  -5  -7  11  316.89   21.49
  -5  -7  10  423.92   31.85
  -5  -7  10  220.41   19.67
  -5  -7   9   46.12   13.14
  -5  -7   9   51.66    9.93
  -5  -7   8   39.87   14.35
  -5  -7   8   66.68   11.37
  -5  -7   7  320.95   47.15
  -5  -7   7  492.72   31.66
  -5  -7   6    6.98    3.95
  -5  -7   6    5.08    6.75
  -5  -7   5  243.65   22.83
  -5  -7   4    4.05    2.70
  -5  -7   3   44.46    9.95
  -5  -7   3   45.34    8.04
  -5  -7   2  330.14   26.95
  -5  -7   2  435.09   26.22
  -5  -7   1   48.41    9.76
  -5  -7   1   93.46   12.28
  -5  -7   0    9.20    3.99
  -5  -7   0   -0.17    1.37
  -5  -8   8   48.07    9.57
  -5  -8   7  683.84   36.61
  -5  -8   6   78.36   12.81
  -5  -8   5   16.97    6.35
  -5  -8   4  435.02   30.62
  -5  -8   3  311.58   25.44
  -6  11   3  166.28   25.22
  -6  11   3   54.71   10.04
  -6  11   2  156.31   30.67
  -6  11   1  937.48   79.49
  -6  11   0  186.83   30.90
  -6  11  -1    5.51    4.52
  -6  11  -1    7.05    4.42
  -6  11  -2  189.76   21.28
  -6  11  -3  439.32   31.97
  -6  11  -4    0.84    1.31
  -6  10   6  517.15   25.32
  -6  10   6  485.74   30.52
  -6  10   5    3.15    2.40
  -6  10   5   -2.08    2.70
  -6  10   4   29.07    9.62
  -6  10   4   16.85    6.00
  -6  10   3 1418.76   91.98
  -6  10   3  714.13   38.64
  -6  10   2  478.90   65.82
  -6  10   2  294.26   23.07
  -6  10   1   49.46   10.82
  -6  10   1   66.50   25.58
  -6  10   0   54.85   11.40
  -6  10   0   50.51   18.65
  -6  10  -1  385.04   29.88
  -6  10  -1  353.40   37.63
  -6  10  -2   13.60    5.86
  -6  10  -2   13.73    5.30
  -6  10  -3  313.18   27.25
  -6  10  -3  307.65   26.87
  -6  10  -4    0.96    1.11
  -6  10  -4   -2.10    2.09
  -6  10  -5    0.38    1.86
  -6  10  -5    2.91    2.95
  -6  10  -6  104.14   13.72
  -6   9   8  880.02   36.55
  -6   9   7   15.90    4.27
  -6   9   7   14.38    5.64
  -6   9   6   25.75    7.26
  -6   9   6   11.03    5.37
  -6   9   5  136.77   20.83
  -6   9   5   85.01   14.91
  -6   9   4  149.87   27.99
  -6   9   4   84.57   14.42
  -6   9   3  272.77   24.71
  -6   9   3  297.21   25.44
  -6   9   2   28.40    8.05
  -6   9   2   70.01   29.77
  -6   9   1   39.38    9.43
  -6   9   1   49.43   22.58
  -6   9   0  143.30   17.90
  -6   9   0  144.45   18.09
  -6   9   0  123.92   31.56
  -6   9  -1  971.30   47.08
  -6   9  -1  994.30   47.95
  -6   9  -1  857.01   63.52
  -6   9  -2   67.64   12.38
  -6   9  -2   65.94   12.36
  -6   9  -3    0.78    1.40
  -6   9  -3   -1.21    4.23
  -6   9  -4  457.15   32.72
  -6   9  -4  489.12   34.57
  -6   9  -5  330.39   27.22
  -6   9  -5  378.63   29.82
  -6   9  -6   82.95   12.77
  -6   9  -6   61.78   11.66
  -6   9  -7   -1.00    2.39
  -6   8   9    0.35    0.78
  -6   8   8  262.50   23.76
  -6   8   7    2.29    2.20
  -6   8   7    6.12    4.39
  -6   8   6   39.75   10.11
  -6   8   6    8.73    4.98
  -6   8   5  547.20   47.96
  -6   8   5  338.34   30.68
  -6   8   4  747.48   40.87
  -6   8   4  714.47   42.43
  -6   8   3    1.11    2.99
  -6   8   3    3.80   13.86
  -6   8   3    2.43    3.44
  -6   8   2  268.43   23.89
  -6   8   2  464.05   89.23
  -6   8   1 1438.91   55.96
  -6   8   1 1417.74  147.89
  -6   8   0  148.41   17.94
  -6   8   0  133.06   35.55
  -6   8  -1  110.30   15.69
  -6   8  -1   90.22   23.22
  -6   8  -1   82.15   20.34
  -6   8  -2  116.17   17.06
  -6   8  -2   40.15   14.21
  -6   8  -3  157.80   19.22
  -6   8  -3  176.98   21.40
  -6   8  -3  188.86   31.80
  -6   8  -4  160.14   19.36
  -6   8  -4  152.81   20.21
  -6   8  -5  103.49   15.28
  -6   8  -5  117.58   17.52
  -6   8  -6   -1.82    2.47
  -6   8  -6    0.41    2.09
  -6   8  -6    1.51    2.13
  -6   8  -7   11.64    3.82
  -6   8  -7   15.72    5.30
  -6   8  -7   20.67    5.85
  -6   8  -8  740.97   31.71
  -6   7  10  668.26   30.82
  -6   7   9  134.97   16.63
  -6   7   8    0.98    0.81
  -6   7   8    2.39    2.33
  -6   7   7  793.28   42.14
  -6   7   7  547.71   40.80
  -6   7   6  499.26   41.10
  -6   7   6  282.96   29.64
  -6   7   5   17.93    9.93
  -6   7   5    4.60    1.38
  -6   7   4   30.88    8.22
  -6   7   4   33.97   16.18
  -6   7   4   24.47    7.61
  -6   7   3  312.30   25.76
  -6   7   3  642.42   97.99
  -6   7   2  109.91   15.26
  -6   7   2  123.08   19.97
  -6   7   2  168.13   61.67
  -6   7   1  447.93   31.12
  -6   7   1  490.24   42.78
  -6   7   1  366.82   81.37
  -6   7   0  273.72   24.43
  -6   7   0  280.82   34.72
  -6   7   0  218.24   47.86
  -6   7  -1   74.43   13.28
  -6   7  -1   61.97   17.88
  -6   7  -1   53.55   17.83
  -6   7  -2  482.96   34.66
  -6   7  -2  310.53   39.60
  -6   7  -3  892.46   48.71
  -6   7  -3  824.53   62.32
  -6   7  -4   55.81   12.36
  -6   7  -4  113.69   20.82
  -6   7  -5    9.52    4.84
  -6   7  -5   11.03    4.90
  -6   7  -6  197.52   22.55
  -6   7  -6  694.86   39.47
  -6   7  -7  261.11   23.48
  -6   7  -7  352.96   24.96
  -6   7  -8    4.39    2.65
  -6   7  -8    4.35    2.47
  -6   6  11  561.81   26.55
  -6   6  11  505.61   21.78
  -6   6  10   33.27    6.76
  -6   6  10   27.79    6.85
  -6   6   9   26.71    7.05
  -6   6   9   22.30    7.24
  -6   6   8  247.51   21.32
  -6   6   8  295.93   29.57
  -6   6   7    3.84    3.53
  -6   6   7    3.42    2.13
  -6   6   6  456.31   42.97
  -6   6   6  370.28   34.24
  -6   6   5    6.63    4.14
  -6   6   5   -1.71    5.92
  -6   6   5    9.94    6.05
  -6   6   4   15.05    5.15
  -6   6   4   12.81    6.01
  -6   6   4   11.87    9.65
  -6   6   4   18.91    6.69
  -6   6   3 1019.57   45.96
  -6   6   3  972.65   50.30
  -6   6   2 1100.10   47.09
  -6   6   2 1170.05   57.99
  -6   6   2 1224.44  176.12
  -6   6   1   34.86    8.32
  -6   6   1   47.93   13.03
  -6   6   1   18.83    8.55
  -6   6   0  145.30   17.71
  -6   6   0  144.92   23.32
  -6   6   0  140.42   37.95
  -6   6  -1 1093.21   68.04
  -6   6  -1  940.85   72.81
  -6   6  -2   60.37   12.23
  -6   6  -2   37.47   12.85
  -6   6  -3   36.33    9.91
  -6   6  -3   37.01   12.73
  -6   6  -4  176.02   22.58
  -6   6  -4  288.82   32.29
  -6   6  -5   61.84   13.29
  -6   6  -5  108.30   17.97
  -6   6  -6   72.02   13.90
  -6   6  -6  249.11   24.79
  -6   6  -7  142.07   17.63
  -6   6  -7  198.69   19.62
  -6   6  -8    5.40    3.07
  -6   6  -8    3.29    2.24
  -6   5  12  228.13   14.11
  -6   5  12  242.61   15.87
  -6   5  11  112.69   11.98
  -6   5  11  132.69   14.55
  -6   5  10  122.71   14.58
  -6   5  10  112.21   15.97
  -6   5   9  222.97   22.66
  -6   5   9  178.22   22.65
  -6   5   8  830.79   42.37
  -6   5   8 1005.68   57.45
  -6   5   7  125.94   19.68
  -6   5   7   72.59   15.70
  -6   5   6    8.45    6.71
  -6   5   6   11.24    5.39
  -6   5   5  425.66   30.63
  -6   5   5  423.77   29.57
  -6   5   5  414.47   53.89
  -6   5   5  460.24   35.75
  -6   5   4  744.98   39.13
  -6   5   4  763.07   40.39
  -6   5   3    6.38    3.31
  -6   5   3    8.22    4.67
  -6   5   3   17.78   22.94
  -6   5   2   41.01    8.94
  -6   5   2   39.21   10.45
  -6   5   2   11.75   14.34
  -6   5   1  707.20   37.54
  -6   5   1  719.96   46.07
  -6   5   1  725.30  116.46
  -6   5   0   67.62   12.08
  -6   5   0   68.64   15.00
  -6   5   0   57.69   23.34
  -6   5  -1  351.40   36.39
  -6   5  -1  320.17   41.78
  -6   5  -2   74.61   13.58
  -6   5  -2   36.74   12.02
  -6   5  -3   16.28    6.96
  -6   5  -3   16.46    8.26
  -6   5  -3    9.44    5.15
  -6   5  -4  250.66   26.69
  -6   5  -4   82.71   17.25
  -6   5  -5  307.39   29.33
  -6   5  -5  567.08   42.24
  -6   5  -6   51.91    9.61
  -6   5  -6   42.19   10.68
  -6   5  -7   38.79    8.60
  -6   5  -7   54.55   10.38
  -6   5  -8  610.75   28.22
  -6   5  -8  543.53   27.10
  -6   4  13  544.29   19.82
  -6   4  13  620.53   22.33
  -6   4  12   18.06    4.69
  -6   4  12   15.31    4.10
  -6   4  12   22.37    5.16
  -6   4  11  116.75   13.47
  -6   4  11  112.21   13.03
  -6   4  11  129.45   15.56
  -6   4  10 1600.61   57.60
  -6   4  10 1590.27   57.58
  -6   4  10 1581.09   62.50
  -6   4   9  267.20   27.18
  -6   4   9  293.77   28.91
  -6   4   9  216.42   23.98
  -6   4   9  220.56   25.72
  -6   4   8   35.54    9.40
  -6   4   8   38.51   11.61
  -6   4   7   93.64   18.04
  -6   4   7   70.65   15.45
  -6   4   6  307.31   38.59
  -6   4   6  366.48   33.78
  -6   4   5  122.50   16.21
  -6   4   5  122.62   15.16
  -6   4   5  117.51   30.45
  -6   4   4   44.56    9.12
  -6   4   4   43.30   23.32
  -6   4   3   17.58    6.28
  -6   4   3   15.32   16.90
  -6   4   2  107.66   15.95
  -6   4   2   32.11   23.71
  -6   4   1 1217.25   57.28
  -6   4   1 1451.73  156.60
  -6   4   0  357.10   33.42
  -6   4   0  326.13   55.24
  -6   4  -1    4.62    5.23
  -6   4  -1   -3.24    4.94
  -6   4  -2  129.63   22.06
  -6   4  -2  211.53   24.85
  -6   4  -3  435.74   39.27
  -6   4  -3  231.48   28.02
  -6   4  -4  132.42   19.70
  -6   4  -4   16.47    8.49
  -6   4  -5   12.10    4.00
  -6   4  -5    4.58    2.77
  -6   4  -6  315.26   22.93
  -6   4  -6  251.42   25.09
  -6   4  -7  153.53   16.90
  -6   4  -8  204.59   16.38
  -6   3  13    4.88    2.32
  -6   3  13    7.00    2.62
  -6   3  13    4.60    2.29
  -6   3  12  441.60   24.30
  -6   3  12  453.50   24.78
  -6   3  12  441.69   24.85
  -6   3  12  524.65   28.07
  -6   3  11  120.44   14.72
  -6   3  11  133.90   16.11
  -6   3  11  131.91   15.84
  -6   3  11  130.96   16.43
  -6   3  10  410.17   33.25
  -6   3  10  416.37   31.89
  -6   3  10  437.20   34.36
  -6   3   9   10.83    7.16
  -6   3   9    2.11    0.26
  -6   3   8   62.44   12.61
  -6   3   8   99.13   22.06
  -6   3   7  127.65   21.73
  -6   3   7   83.16   21.84
  -6   3   6 1039.75   73.24
  -6   3   5   30.23    7.16
  -6   3   5   17.27   12.60
  -6   3   4  308.03   23.48
  -6   3   4  328.97   31.56
  -6   3   3 2475.86   69.37
  -6   3   3 2761.39   94.32
  -6   3   2 1344.37   54.59
  -6   3   2 1400.60  178.42
  -6   3   2 1568.18   73.72
  -6   3   1   55.67   12.14
  -6   3   1   97.81   39.95
  -6   3   1   58.63   15.30
  -6   3   0   59.67   13.39
  -6   3   0  115.37   30.85
  -6   3  -1  314.14   32.53
  -6   3  -1  443.10   34.29
  -6   3  -1  360.07   41.11
  -6   3  -2    2.53    1.54
  -6   3  -2    7.84    5.23
  -6   3  -3  242.92   28.12
  -6   3  -3   79.40   17.49
  -6   3  -4    4.19    4.25
  -6   3  -4   -1.77    4.71
  -6   3  -5    5.19    3.23
  -6   3  -5    5.30    4.54
  -6   3  -6  633.82   31.22
  -6   3  -6  594.83   37.33
  -6   3  -7  608.97   32.85
  -6   2  13    2.80    1.70
  -6   2  13    2.33    1.31
  -6   2  13    0.58    0.77
  -6   2  13    4.13    2.48
  -6   2  12  630.19   31.17
  -6   2  12  673.00   33.59
  -6   2  12  688.17   32.35
  -6   2  12  760.99   35.17
  -6   2  11  431.80   32.25
  -6   2  11  539.68   33.10
  -6   2  10    2.92    2.85
  -6   2  10    0.24    3.38
  -6   2   9  100.25   14.37
  -6   2   9  116.58   21.79
  -6   2   8  427.10   34.37
  -6   2   7   81.95   17.51
  -6   2   6   12.16    7.80
  -6   2   5  303.21   50.79
  -6   2   5  436.57   32.93
  -6   2   4  193.56   17.91
  -6   2   4  205.38   23.04
  -6   2   3  116.73   14.93
  -6   2   3  123.30   18.43
  -6   2   2  470.42   31.58
  -6   2   2  526.09   39.22
  -6   2   1   82.87   14.33
  -6   2   1   95.70   17.50
  -6   2   0   84.19   15.44
  -6   2   0  102.54   15.74
  -6   2   0  129.91   30.76
  -6   2   0   69.29   15.15
  -6   2  -1  478.83   39.20
  -6   2  -1  657.69   44.15
  -6   2  -1  765.06   56.55
  -6   2  -1  436.84   37.94
  -6   2  -2   58.76   13.74
  -6   2  -2   90.06   18.11
  -6   2  -3    3.24    4.50
  -6   2  -3   -2.84    3.08
  -6   2  -4  471.95   34.70
  -6   2  -4  231.49   27.84
  -6   2  -5 1170.32   47.85
  -6   2  -5  972.12   52.18
  -6   2  -6   25.54    5.86
  -6   2  -6   23.96    7.26
  -6   2  -7   63.78    7.44
  -6   1  13  674.37   28.35
  -6   1  13  692.04   30.19
  -6   1  13  720.55   28.88
  -6   1  13  762.45   30.54
  -6   1  12   24.07    7.33
  -6   1  12   20.12    5.59
  -6   1  11   27.60    7.19
  -6   1  11   18.82    7.72
  -6   1  11   25.31    7.50
  -6   1  10  238.56   29.85
  -6   1  10  748.80   45.12
  -6   1   9   15.47    5.67
  -6   1   9   42.38   12.17
  -6   1   8  114.26   18.05
  -6   1   7   20.02    9.31
  -6   1   6   23.23    7.04
  -6   1   5  468.41   32.45
  -6   1   4 1009.19   39.69
  -6   1   4 1074.92   49.97
  -6   1   3   10.70    4.71
  -6   1   3   20.32    7.71
  -6   1   2  127.04   16.08
  -6   1   2  138.78   19.30
  -6   1   1 1220.96   54.69
  -6   1   1 1305.94   60.90
  -6   1   0  417.65   34.37
  -6   1   0  413.80   35.49
  -6   1  -1   10.07    5.62
  -6   1  -1   11.46    6.46
  -6   1  -2    4.66    4.18
  -6   1  -2   15.12    6.86
  -6   1  -3  237.71   26.05
  -6   1  -4   85.76   14.13
  -6   1  -5  257.58   21.09
  -6   1  -6   70.99    9.15
  -6   1  -7   11.60    2.82
  -6   0  14   46.41    6.44
  -6   0  14   54.75    6.58
  -6   0  13  180.93   14.96
  -6   0  13  219.78   17.82
  -6   0  13  200.77   15.37
  -6   0  12   17.46    5.01
  -6   0  12   11.32    5.21
  -6   0  12   12.15    4.48
  -6   0  11   20.85    6.57
  -6   0  11    5.69    3.00
  -6   0  11   23.31    6.96
  -6   0  10  905.35   50.52
  -6   0  10  764.99   43.96
  -6   0   9  148.83   18.04
  -6   0   9  600.03   46.42
  -6   0   8    2.87    2.83
  -6   0   7  193.14   19.79
  -6   0   6 1139.68   48.55
  -6   0   5   19.90    6.75
  -6   0   4   13.84    5.65
  -6   0   3  436.59   27.34
  -6   0   3  455.76   32.92
  -6   0   2  108.77   14.92
  -6   0   2  106.36   16.88
  -6   0   1  566.88   37.29
  -6   0   1  637.24   41.88
  -6   0   0   38.22   10.34
  -6   0   0   40.00   10.96
  -6   0  -1   13.41    5.73
  -6   0  -1   17.35    7.23
  -6   0  -2   74.73   14.82
  -6   0  -2   83.53   15.24
  -6   0  -3  958.50   49.16
  -6   0  -3 1017.56   47.52
  -6   0  -4   26.21    7.37
  -6   0  -5    3.29    2.53
  -6   0  -6  759.20   27.42
  -6  -1  13   28.26    6.68
  -6  -1  13   34.02    6.18
  -6  -1  13   35.12    6.04
  -6  -1  12 1024.81   40.49
  -6  -1  12  963.40   37.93
  -6  -1  11  584.14   35.57
  -6  -1  11  464.28   30.68
  -6  -1  10    5.92    4.32
  -6  -1  10    5.85    4.02
  -6  -1   9   10.42    6.31
  -6  -1   9    5.09    3.29
  -6  -1   9   13.74    5.45
  -6  -1   8  229.22   28.71
  -6  -1   7    2.30    1.59
  -6  -1   6  349.45   25.92
  -6  -1   5    5.25    3.81
  -6  -1   4    4.16    3.08
  -6  -1   3  574.09   30.96
  -6  -1   3  564.42   36.38
  -6  -1   2  800.69   40.33
  -6  -1   2  821.15   45.66
  -6  -1   1  108.90   16.06
  -6  -1   1  113.54   17.74
  -6  -1   0    5.54    2.93
  -6  -1   0    4.46    3.20
  -6  -1  -1  194.94   23.42
  -6  -1  -1  222.13   25.13
  -6  -1  -2  168.75   20.83
  -6  -1  -2  152.73   19.76
  -6  -1  -3   26.38    7.73
  -6  -1  -3   22.07    6.96
  -6  -1  -4  198.56   18.24
  -6  -1  -5  169.69   14.26
  -6  -1  -6   62.89    6.86
  -6  -2  13   78.37   10.69
  -6  -2  13   97.93   10.14
  -6  -2  13   92.23    9.75
  -6  -2  12  132.41   14.36
  -6  -2  12  128.97   13.74
  -6  -2  11   90.70   13.81
  -6  -2  11   72.27   12.26
  -6  -2  10   49.73   11.47
  -6  -2  10  120.46   18.62
  -6  -2   9   -0.05    3.07
  -6  -2   9   39.82   12.91
  -6  -2   8  789.80   36.48
  -6  -2   8  532.30   40.97
  -6  -2   7  222.22   19.73
  -6  -2   7  188.07   25.46
  -6  -2   6    1.33    2.25
  -6  -2   5  467.33   29.77
  -6  -2   4  974.72   44.56
  -6  -2   3   22.13    7.50
  -6  -2   2    0.94    0.61
  -6  -2   2    2.11    2.66
  -6  -2   1  309.14   26.71
  -6  -2   1  320.54   29.11
  -6  -2   0   46.77   10.69
  -6  -2   0   50.66   11.55
  -6  -2  -1   22.72    7.62
  -6  -2  -1   12.58    5.55
  -6  -2  -2    5.68    2.91
  -6  -2  -2   13.64    5.95
  -6  -2  -3   58.60   10.39
  -6  -2  -3   51.56    9.56
  -6  -2  -4  143.99   13.87
  -6  -2  -4  140.60   12.72
  -6  -2  -5  651.06   23.96
  -6  -3  12   14.80    4.52
  -6  -3  12    6.85    3.75
  -6  -3  12   20.91    5.27
  -6  -3  11   20.05    6.38
  -6  -3  11   27.05    7.07
  -6  -3  10 1235.05   58.91
  -6  -3  10  465.23   33.22
  -6  -3   9  676.54   51.59
  -6  -3   9  202.14   23.13
  -6  -3   8   16.97    6.97
  -6  -3   8   23.15    6.03
  -6  -3   7  160.87   16.01
  -6  -3   7  139.94   20.34
  -6  -3   6  515.94   29.54
  -6  -3   6  520.65   39.32
  -6  -3   5    6.10    5.12
  -6  -3   5    6.99    4.09
  -6  -3   4  257.08   22.63
  -6  -3   3   24.36    7.36
  -6  -3   2    4.82    2.43
  -6  -3   2   -0.36    0.97
  -6  -3   1  257.72   23.25
  -6  -3   1  279.50   26.38
  -6  -3   0  129.69   17.06
  -6  -3   0  144.78   18.95
  -6  -3  -1    0.57    1.85
  -6  -3  -1    3.22    1.96
  -6  -3  -2   97.78   13.26
  -6  -3  -2   98.89   13.90
  -6  -3  -3  732.46   31.77
  -6  -3  -3  807.90   33.14
  -6  -3  -4  182.42   13.07
  -6  -4  12  224.92   16.51
  -6  -4  11  343.76   24.65
  -6  -4  11  214.65   19.19
  -6  -4  10   45.46    9.91
  -6  -4  10  177.28   21.32
  -6  -4   9   14.28    5.96
  -6  -4   9   67.70   15.92
  -6  -4   8  142.97   19.34
  -6  -4   7   74.08   10.17
  -6  -4   7   89.40   15.59
  -6  -4   6  655.60   31.67
  -6  -4   6  643.20   42.76
  -6  -4   5  121.79   14.29
  -6  -4   5  129.99   19.58
  -6  -4   4   17.44    7.91
  -6  -4   4    7.87    4.19
  -6  -4   3  464.38   30.81
  -6  -4   2  643.86   37.54
  -6  -4   1   12.41    4.27
  -6  -4   1   10.83    5.07
  -6  -4   0    6.02    3.02
  -6  -4   0    4.16    2.81
  -6  -4  -1  190.42   17.62
  -6  -4  -1  172.20   18.22
  -6  -4  -2    8.51    3.64
  -6  -4  -2    7.43    3.66
  -6  -5  10   -2.18    1.33
  -6  -5  10    1.68    1.18
  -6  -5   9   14.12    5.46
  -6  -5   8  579.21   37.65
  -6  -5   7  142.08   19.44
  -6  -5   6    2.99    1.47
  -6  -5   6    2.18    1.99
  -6  -5   5  148.00   14.92
  -6  -5   5  143.24   20.34
  -6  -5   4  407.94   25.74
  -6  -5   4  286.24   28.89
  -6  -5   3   65.22   13.35
  -6  -5   3  129.95   15.34
  -6  -5   2  145.66   16.63
  -6  -5   1   17.15    5.66
  -6  -5   0   -1.38    1.86
  -6  -5  -1  363.69   21.94
  -6  -6   8   92.57   14.93
  -6  -6   7   17.49    6.93
  -6  -6   6   61.71   13.39
  -6  -6   5  151.40   21.22
  -6  -6   4  463.80   25.35
  -6  -6   3   11.88    4.22
  -7  10   2  594.58   54.59
  -7  10  -1   97.51   15.00
  -7   9   5   -3.21    3.05
  -7   9   4  548.66   48.62
  -7   9   3 1078.99   85.57
  -7   9   2   -3.96    9.87
  -7   9   1   44.67   10.31
  -7   9   1   37.99   13.60
  -7   9   0  343.59   27.43
  -7   9   0  314.78   32.01
  -7   9  -1   38.10    9.25
  -7   9  -2  208.44   21.47
  -7   9  -3   20.53    6.69
  -7   8   7    8.08    3.22
  -7   8   6  156.00   18.60
  -7   8   6   62.24    9.98
  -7   8   5  521.24   43.97
  -7   8   4   99.19   24.68
  -7   8   3  362.87   59.74
  -7   8   2   37.63    9.08
  -7   8   2   27.20   17.66
  -7   8   1   94.58   14.23
  -7   8   1   59.06   20.73
  -7   8   0  600.19   35.79
  -7   8   0  553.61   47.22
  -7   8  -1  204.15   21.27
  -7   8  -2   -0.93    1.41
  -7   8  -3   82.88   13.25
  -7   8  -4  182.84   18.71
  -7   7   8    4.16    1.60
  -7   7   8    3.87    2.73
  -7   7   7   56.08   10.13
  -7   7   7   17.09    5.52
  -7   7   6  219.10   25.64
  -7   7   6  120.12   14.41
  -7   7   5 1073.14   73.54
  -7   7   4   58.41   23.12
  -7   7   3   12.59    5.39
  -7   7   3   16.72   15.93
  -7   7   2  663.95   37.68
  -7   7   2  598.01   88.79
  -7   7   1  587.70   35.44
  -7   7   1  550.00   45.56
  -7   7   1  518.19   66.12
  -7   7   0   13.39    5.52
  -7   7   0   11.93    7.38
  -7   7   0   10.11    6.85
  -7   7  -1   30.46    7.77
  -7   7  -1   16.70    8.04
  -7   7  -2  274.90   24.79
  -7   7  -2  359.02   38.30
  -7   7  -3   -3.36    3.23
  -7   7  -3    2.31    2.46
  -7   7  -4   21.99    6.96
  -7   7  -4  202.09   20.23
  -7   6   9    4.42    3.10
  -7   6   8  147.30   14.63
  -7   6   8  124.01   15.15
  -7   6   7  648.97   39.34
  -7   6   7  350.65   26.19
  -7   6   6  193.80   27.13
  -7   6   5   32.42   16.09
  -7   6   4  486.43   73.20
  -7   6   3  295.33   25.17
  -7   6   3  314.20   28.09
  -7   6   2  197.51   20.44
  -7   6   2  184.45   23.58
  -7   6   2  155.64   46.65
  -7   6   1  167.67   18.88
  -7   6   1  170.92   24.18
  -7   6   1  122.95   33.22
  -7   6   0   43.85    9.75
  -7   6   0   41.64   12.70
  -7   6   0   38.44   13.57
  -7   6  -1   58.31   11.20
  -7   6  -1   50.72   14.14
  -7   6  -2  299.48   25.41
  -7   6  -2  346.01   36.05
  -7   6  -3   93.39   13.88
  -7   6  -3  385.90   34.01
  -7   6  -4    7.38    4.32
  -7   6  -4   24.33    6.79
  -7   5  10    0.36    1.96
  -7   5   9  286.79   22.71
  -7   5   8   34.12    7.84
  -7   5   8   13.42    5.27
  -7   5   7  165.30   21.88
  -7   5   7  109.23   15.03
  -7   5   6    2.46    2.23
  -7   5   5   73.03   24.21
  -7   5   4  452.17   30.39
  -7   5   4  861.35  105.18
  -7   5   3  500.05   34.32
  -7   5   3  636.48  110.41
  -7   5   2    5.93    4.63
  -7   5   2    5.22   12.38
  -7   5   1   81.59   15.99
  -7   5   1   57.63   22.04
  -7   5   0  863.01   54.60
  -7   5   0  721.36   58.33
  -7   5  -1  207.10   27.26
  -7   5  -2   80.26   16.47
  -7   5  -3   59.71   13.10
  -7   5  -4  561.31   33.47
  -7   5  -5   48.62    7.81
  -7   4  11   12.10    3.38
  -7   4  10   17.77    4.91
  -7   4  10   14.64    4.90
  -7   4   9  341.29   21.54
  -7   4   9  381.59   27.40
  -7   4   8  193.32   20.38
  -7   4   8   95.33   14.50
  -7   4   7    7.60    4.84
  -7   4   6  180.06   30.85
  -7   4   5 1130.05   43.52
  -7   4   5 1332.39  107.60
  -7   4   4   24.39    6.69
  -7   4   4   26.59   20.65
  -7   4   3   18.61    6.44
  -7   4   3   16.69   13.29
  -7   4   2  118.87   17.30
  -7   4   2  104.88   36.91
  -7   4   1   68.39   13.88
  -7   4   1   50.38   18.95
  -7   4   0  147.87   21.99
  -7   4   0  145.52   25.35
  -7   4  -1   18.88    7.25
  -7   4  -2    2.93    4.34
  -7   4  -3   69.38   13.41
  -7   4  -4  975.58   42.48
  -7   4  -5  111.20   11.45
  -7   3  11  369.94   20.44
  -7   3  11  374.75   21.89
  -7   3  10  676.42   33.56
  -7   3  10  513.06   29.61
  -7   3   9    2.49    3.27
  -7   3   9    1.73    1.43
  -7   3   9    1.55    1.99
  -7   3   8    1.28    2.12
  -7   3   7  304.63   33.21
  -7   3   6   36.10   14.01
  -7   3   5  310.14   54.93
  -7   3   4   18.91    5.49
  -7   3   4   30.72   22.31
  -7   3   3   23.77    6.88
  -7   3   3   13.61   14.15
  -7   3   2  462.08   32.93
  -7   3   2  482.58   78.66
  -7   3   1  581.28   39.62
  -7   3   1  570.35   64.04
  -7   3   0   15.02    6.57
  -7   3   0    7.33    4.23
  -7   3  -1   34.37    9.83
  -7   3  -2  461.26   35.52
  -7   3  -3  192.30   20.88
  -7   3  -4    5.59    3.71
  -7   3  -5  112.31   10.80
  -7   2  11  239.40   17.69
  -7   2  11  206.29   17.31
  -7   2  11  245.52   18.11
  -7   2  10   40.10    9.90
  -7   2  10   41.20    8.42
  -7   2   9   21.64    5.86
  -7   2   9   36.61   10.71
  -7   2   9   23.89    6.74
  -7   2   8   15.71    6.66
  -7   2   8    4.34    3.17
  -7   2   7  470.31   42.75
  -7   2   7  291.20   39.22
  -7   2   6  138.45   29.31
  -7   2   5   -4.40   12.33
  -7   2   4  330.92   23.22
  -7   2   4  192.58   53.85
  -7   2   3  658.56   35.52
  -7   2   3  556.81   92.33
  -7   2   3  664.56   49.30
  -7   2   2   40.91    9.54
  -7   2   2   38.14   21.05
  -7   2   2   26.22   10.35
  -7   2   1    2.13    3.13
  -7   2   1   -0.17    2.81
  -7   2   1    1.15    1.87
  -7   2   0  222.86   24.64
  -7   2   0  260.63   30.33
  -7   2   0  206.16   27.66
  -7   2  -1   46.36   11.34
  -7   2  -2   82.06   14.25
  -7   2  -3   17.53    5.95
  -7   2  -4   35.10    6.86
  -7   1  11   25.11    6.99
  -7   1  11   28.07    6.12
  -7   1  10   20.86    6.94
  -7   1  10   17.57    5.73
  -7   1   9  393.75   26.39
  -7   1   9  410.57   37.16
  -7   1   8  161.60   20.66
  -7   1   7    5.57    4.49
  -7   1   6  134.71   29.52
  -7   1   5  227.88   47.85
  -7   1   5  429.15   33.86
  -7   1   4   -1.41   11.11
  -7   1   4    3.04    3.28
  -7   1   3  250.61   21.07
  -7   1   3  286.67   62.62
  -7   1   3  246.54   27.89
  -7   1   2   15.27    5.40
  -7   1   2   15.33    6.93
  -7   1   1   14.04    5.98
  -7   1   1   19.53   10.46
  -7   1   1    5.84    4.42
  -7   1   0  338.86   29.23
  -7   1   0  257.73   28.91
  -7   1  -1  131.47   18.29
  -7   1  -1  698.11   42.71
  -7   1  -2    5.81    3.74
  -7   1  -3   82.06   11.84
  -7   1  -4  564.04   25.63
  -7   0  11  280.23   22.59
  -7   0  10   85.60   15.15
  -7   0   9   59.73   10.26
  -7   0   9   36.57   11.61
  -7   0   8    4.07    3.36
  -7   0   7   52.89   14.54
  -7   0   6   75.53   22.05
  -7   0   5  335.52   58.11
  -7   0   5  582.76   37.58
  -7   0   4   52.45   29.75
  -7   0   4  109.36   17.01
  -7   0   3    2.66    2.62
  -7   0   3   12.78   15.77
  -7   0   3    2.84    2.79
  -7   0   2  503.89   31.13
  -7   0   2  414.98   35.43
  -7   0   1  507.98   33.04
  -7   0   1  325.65   31.43
  -7   0   0    0.37    3.61
  -7   0   0  -12.23    5.73
  -7   0  -1    1.76    1.36
  -7   0  -1    5.67    3.47
  -7   0  -2  380.30   26.46
  -7   0  -3   34.95    6.99
  -7  -1  11  266.16   21.68
  -7  -1  10  209.12   22.95
  -7  -1   9    0.20    0.51
  -7  -1   8   10.23    5.44
  -7  -1   7  740.93   55.27
  -7  -1   6  214.48   36.98
  -7  -1   6  298.14   24.66
  -7  -1   5    9.37    5.11
  -7  -1   4  103.62   15.96
  -7  -1   3  212.63   23.42
  -7  -1   2   45.74    8.77
  -7  -1   2   40.51   10.66
  -7  -1   1   72.77   11.82
  -7  -1   1  116.96   19.17
  -7  -1   0    3.65    2.85
  -7  -1   0    2.72    1.85
  -7  -1  -1    1.89    2.15
  -7  -1  -1   -1.13    3.37
  -7  -1  -2  468.17   25.82
  -7  -2  10    2.14    1.89
  -7  -2   9  127.49   14.10
  -7  -2   8   28.14    8.24
  -7  -2   7   49.20   14.22
  -7  -2   6   47.97    9.55
  -7  -2   5   48.08   10.01
  -7  -2   4   61.23   11.73
  -7  -2   3  326.36   27.87
  -7  -2   2   24.24   11.11
  -7  -2   2    2.89    3.54
  -7  -2   1   18.14    5.25
  -7  -2   1    6.21    3.46
  -7  -2   0   98.41   12.63
  -7  -2   0  321.79   25.30
  -7  -2  -1  225.83   17.14
  -7  -3   8  133.59   17.61
  -7  -3   7    0.36    0.84
  -7  -3   6  126.16   14.35
  -7  -3   5  535.18   31.41
  -7  -3   4   78.74   12.75
  -7  -3   3   27.06    7.76
  -7  -3   2  183.08   21.92
  -7  -3   2   59.04   11.47
  -7  -3   1   29.99    7.70
  -7  -4   6   28.20   12.90
  -8   6   5  151.77   24.76
  -8   6   4    2.71    8.10
  -8   6   3  198.45   34.53
  -8   6   2  456.89   42.83
  -8   5   6    6.04    4.76
  -8   5   5    5.18    3.89
  -8   5   4  767.81   74.95
  -8   5   3   33.28   15.03
  -8   5   2  149.64   18.58
  -8   5   2  129.74   23.59
  -8   5   1    1.12    2.33
  -8   5   0    0.01    0.57
  -8   5  -1  368.20   28.47
  -8   4   7    2.36    2.70
  -8   4   6  102.74   19.47
  -8   4   5  734.98   67.41
  -8   4   4  407.14   57.62
  -8   4   3   53.99    9.70
  -8   4   3   47.43   18.34
  -8   4   2    4.02    3.99
  -8   4   2    6.33    6.07
  -8   4   1  250.04   24.19
  -8   4   0  169.47   19.90
  -8   4  -1    1.33    2.03
  -8   3   7   64.39   12.59
  -8   3   6  682.75   54.06
  -8   3   5  437.05   54.63
  -8   3   4   18.55   15.60
  -8   3   3  121.66   14.00
  -8   3   3  125.45   28.29
  -8   3   2  288.11   23.21
  -8   3   2  249.84   30.54
  -8   3   1    5.32    3.88
  -8   3   0   18.44    6.37
  -8   2   7  117.70   17.77
  -8   2   6  176.97   28.66
  -8   2   5   15.02   10.44
  -8   2   4   17.54   11.86
  -8   2   3   30.76   12.95
  -8   2   2  365.80   24.66
  -8   2   2  333.83   31.95
  -8   2   1    2.07    2.25
  -8   1   7  184.40   22.74
  -8   1   6    0.80    8.91
  -8   1   5   85.20   24.21
  -8   1   4  428.39   53.77
  -8   1   3   87.16   19.08
  -8   0   5   63.58   20.18
   0   0   0    0.00    0.00


TITL MXF-20181217 in P-1
REM P-1 (#2 in standard setting)
CELL 1.54184   6.774267  11.159094  13.772140 100.8813 102.2213 105.5711
ZERR    4.00   0.000325   0.000578   0.000438   0.0034   0.0033   0.0043
LATT  1
SFAC C H N O
UNIT 44.00 40.00 4.00 4.00
TREF
HKLF 4
END
_computing_structure_solution     'SHELXT 2014/5 (Sheldrick, 2014)'
;
_shelx_hkl_checksum                79263
_olex2_submission_special_instructions  'No special instructions were received'
_oxdiff_exptl_absorpt_empirical_details
;
Empirical correction (ABSPACK) includes:
- Absorption correction using spherical harmonics
- Frame scaling
;
_oxdiff_exptl_absorpt_empirical_full_max  10.474
_oxdiff_exptl_absorpt_empirical_full_min  0.442
