# Supplementary material
Source: publisher figshare collection journal article supplement (https://tandf.figshare.com/articles/dataset/_/12212963)
Supplement: Supplementary file 1 [file 1 › 2.cif]

data_ya327
_audit_creation_date              2018-02-08
_audit_creation_method
;
Olex2 1.2-beta
(compiled 2017.08.10 svn.r3458 for OlexSys, GUI svn.r5381)
;
_shelx_SHELXL_version_number      '2014/7'
_publ_contact_author_address      ?
_publ_contact_author_email        ?
_publ_contact_author_id_orcid     ?
_publ_contact_author_name         ''
_publ_contact_author_phone        ?
_publ_section_references
;
Dolomanov, O.V., Bourhis, L.J., Gildea, R.J, Howard, J.A.K. & Puschmann, H.
 (2009), J. Appl. Cryst. 42, 339-341.

Sheldrick, G.M. (2015). Acta Cryst. C71, 3-8.
;
_chemical_name_common             ?
_chemical_name_systematic         ?
_chemical_formula_moiety          'C14 H15 N O7 Y'
_chemical_formula_sum             'C14 H15 N O7 Y'
_chemical_formula_weight          398.18
_chemical_melting_point           ?
loop_
  _atom_type_symbol
  _atom_type_description
  _atom_type_scat_dispersion_real
  _atom_type_scat_dispersion_imag
  _atom_type_scat_source
 'C' 'C' 0.0181 0.0091 'International Tables Vol C Tables 4.2.6.8 and 6.1.1.4'
 'H' 'H' 0.0000 0.0000 'International Tables Vol C Tables 4.2.6.8 and 6.1.1.4'
 'N' 'N' 0.0311 0.0180 'International Tables Vol C Tables 4.2.6.8 and 6.1.1.4'
 'O' 'O' 0.0492 0.0322 'International Tables Vol C Tables 4.2.6.8 and 6.1.1.4'
 'Y' 'Y' -0.2670 2.0244 'International Tables Vol C Tables 4.2.6.8 and 6.1.1.4'

_shelx_space_group_comment
;
The symmetry employed for this shelxl refinement is uniquely defined
by the following loop, which should always be used as a source of
symmetry information in preference to the above space-group names.
They are only intended as comments.
;
_space_group_crystal_system       'monoclinic'
_space_group_IT_number            14
_space_group_name_H-M_alt         'P 1 21/n 1'
_space_group_name_Hall            '-P 2yn'
loop_
  _space_group_symop_operation_xyz
 'x, y, z'
 '-x+1/2, y+1/2, -z+1/2'
 '-x, -y, -z'
 'x-1/2, -y-1/2, z-1/2'

_cell_length_a                    9.0162(2)
_cell_length_b                    17.4431(4)
_cell_length_c                    11.6043(3)
_cell_angle_alpha                 90
_cell_angle_beta                  95.066(2)
_cell_angle_gamma                 90
_cell_volume                      1817.88(7)
_cell_formula_units_Z             4
_cell_measurement_reflns_used     4805
_cell_measurement_temperature     293(2)
_cell_measurement_theta_max       72.3950
_cell_measurement_theta_min       5.0630
_shelx_estimated_absorpt_T_max    0.478
_shelx_estimated_absorpt_T_min    0.417
_exptl_absorpt_coefficient_mu     4.812
_exptl_absorpt_correction_T_max   0.470
_exptl_absorpt_correction_T_min   0.409
_exptl_absorpt_correction_type    multi-scan
_exptl_absorpt_process_details    SADABS
_exptl_absorpt_special_details    ?
_exptl_crystal_colour             colorless
_exptl_crystal_density_diffrn     1.455
_exptl_crystal_density_meas       ?
_exptl_crystal_density_method     ?
_exptl_crystal_description        block
_exptl_crystal_F_000              804
_exptl_crystal_size_max           0.22
_exptl_crystal_size_mid           0.2
_exptl_crystal_size_min           0.18
_exptl_transmission_factor_max    ?
_exptl_transmission_factor_min    ?
_diffrn_reflns_av_R_equivalents   0.0366
_diffrn_reflns_av_unetI/netI      0.0372
_diffrn_reflns_Laue_measured_fraction_full 0.999
_diffrn_reflns_Laue_measured_fraction_max 0.974
_diffrn_reflns_limit_h_max        11
_diffrn_reflns_limit_h_min        -10
_diffrn_reflns_limit_k_max        20
_diffrn_reflns_limit_k_min        -21
_diffrn_reflns_limit_l_max        14
_diffrn_reflns_limit_l_min        -10
_diffrn_reflns_number             7361
_diffrn_reflns_point_group_measured_fraction_full 0.999
_diffrn_reflns_point_group_measured_fraction_max 0.974
_diffrn_reflns_theta_full         67.684
_diffrn_reflns_theta_max          72.458
_diffrn_reflns_theta_min          4.589
_diffrn_ambient_temperature       293(2)
_diffrn_detector_area_resol_mean  8.0528
_diffrn_measured_fraction_theta_full 0.999
_diffrn_measured_fraction_theta_max 0.974
_diffrn_measurement_device_type   'SuperNova, Dual, Cu at zero, EosS2'
_diffrn_measurement_method        '\w scans'
_diffrn_radiation_type            CuK\a
_diffrn_radiation_wavelength      1.54184
_diffrn_source                    ?
_reflns_Friedel_coverage          0.000
_reflns_Friedel_fraction_full     .
_reflns_Friedel_fraction_max      .
_reflns_number_gt                 3287
_reflns_number_total              3516
_reflns_special_details
;
 Reflections were merged by SHELXL according to the crystal
 class for the calculation of statistics and refinement.
 
 Structure factors included contributions from the .fab file.
 
 _reflns_Friedel_fraction is defined as the number of unique
 Friedel pairs measured divided by the number that would be
 possible theoretically, ignoring centric projections and
 systematic absences.
;
_reflns_threshold_expression      'I > 2\s(I)'
_computing_cell_refinement        'CrysAlisPro 1.171.38.43f (Rigaku OD, 2015)'
_computing_data_collection        'CrysAlisPro 1.171.38.43f (Rigaku OD, 2015)'
_computing_data_reduction         'CrysAlisPro 1.171.38.43f (Rigaku OD, 2015)'
_computing_molecular_graphics     'Olex2 (Dolomanov et al., 2009)'
_computing_publication_material   'Olex2 (Dolomanov et al., 2009)'
_computing_structure_refinement   'ShelXL (Sheldrick, 2015)'
_computing_structure_solution     'SHELXL-2014/6 (Sheldrick, 2014)'
_refine_diff_density_max          1.175
_refine_diff_density_min          -1.383
_refine_diff_density_rms          0.147
_refine_ls_extinction_coef        .
_refine_ls_extinction_method      none
_refine_ls_goodness_of_fit_ref    1.083
_refine_ls_hydrogen_treatment     constr
_refine_ls_matrix_type            full
_refine_ls_number_parameters      267
_refine_ls_number_reflns          3516
_refine_ls_number_restraints      319
_refine_ls_R_factor_all           0.0606
_refine_ls_R_factor_gt            0.0587
_refine_ls_restrained_S_all       1.072
_refine_ls_shift/su_max           0.000
_refine_ls_shift/su_mean          0.000
_refine_ls_structure_factor_coef  Fsqd
_refine_ls_weighting_details
'w=1/[\s^2^(Fo^2^)+(0.1120P)^2^+2.5493P] where P=(Fo^2^+2Fc^2^)/3'
_refine_ls_weighting_scheme       calc
_refine_ls_wR_factor_gt           0.1632
_refine_ls_wR_factor_ref          0.1658
_refine_special_details           ?
_olex2_refinement_description
;
1. Fixed Uiso
 At 1.2 times of:
  All C(H) groups
 At 1.5 times of:
  All C(H,H,H) groups
2. Restrained distances
 Y1-O7A = Y1-O7
 2.2 with sigma of 0.01
 O7A-C11A = O7-C11
 1.3 with sigma of 0.01
 C12A-C11A = N1A-C11A = N1A-C15A = N1A-C14A = N1-C15 = N1-C14 = N1-C11
 1.45 with sigma of 0.01
 C9-C10 = C9-C10A
 1.45 with sigma of 0.01
3. Uiso/Uaniso restraints and constraints
O7 \\sim C11 \\sim C12 \\sim N1 \\sim C14 \\sim C15 \\sim O7A \\sim C11A \\sim
C12A \\sim N1A \\sim C14A \\sim C15A: within 2A with sigma of 0.01 and sigma
for terminal atoms of 0.02
Uanis(C14) \\sim Ueq, Uanis(N1) \\sim Ueq, Uanis(C15) \\sim Ueq, Uanis(C12)
\\sim Ueq, Uanis(C11) \\sim Ueq: with sigma of 0.01 and sigma for terminal
atoms of 0.02
Uanis(O7) \\sim Ueq, Uanis(C11) \\sim Ueq, Uanis(C12) \\sim Ueq, Uanis(N1)
\\sim Ueq, Uanis(C14) \\sim Ueq, Uanis(C15) \\sim Ueq, Uanis(O7A) \\sim Ueq,
Uanis(C11A) \\sim Ueq, Uanis(C12A) \\sim Ueq, Uanis(N1A) \\sim Ueq, Uanis(C14A)
\\sim Ueq, Uanis(C15A) \\sim Ueq: with sigma of 0.01 and sigma for terminal
atoms of 0.02
Uanis(C10) \\sim Ueq, Uanis(C10A) \\sim Ueq: with sigma of 0.01 and sigma for
terminal atoms of 0.02
Uanis(C10) = Uanis(C10A)
4. Rigid body (RIGU) restrains
 C14, C11, C15, C12, N1
 with sigma for 1-2 distances of 0.01 and sigma for 1-3 distances of 0.01
 O7, C11, C12, N1, C14, C15, O7A, C11A, C12A, N1A, C14A, C15A
 with sigma for 1-2 distances of 0.01 and sigma for 1-3 distances of 0.01
5. Others
 Sof(O7A)=Sof(C11A)=Sof(C12A)=Sof(H12D)=Sof(H12E)=Sof(H12F)=Sof(N1A)=Sof(C14A)=
 Sof(H14D)=Sof(H14E)=Sof(H14F)=Sof(C15A)=Sof(H15D)=Sof(H15E)=Sof(H15F)=1-FVAR(1)
 Sof(O7)=Sof(C11)=Sof(C12)=Sof(H12A)=Sof(H12B)=Sof(H12C)=Sof(N1)=Sof(C14)=
 Sof(H14A)=Sof(H14B)=Sof(H14C)=Sof(C15)=Sof(H15A)=Sof(H15B)=Sof(H15C)=FVAR(1)
 Sof(C10A)=Sof(H10D)=Sof(H10E)=Sof(H10F)=1-FVAR(2)
 Sof(C10)=Sof(H10A)=Sof(H10B)=Sof(H10C)=FVAR(2)
6.a Riding coordinates:
 C10(H10A,H10B,H10C), C12(H12A,H12B,H12C), C14(H14A,H14B,H14C), C15(H15A,H15B,
 H15C), C12A(H12D,H12E,H12F), C14A(H14D,H14E,H14F), C15A(H15D,H15E,H15F),
 C10A(H10D,H10E,H10F)
6.b Aromatic/amide H refined with riding coordinates:
 C3(H3), C5(H5), C7(H7)
;
_atom_sites_solution_hydrogens    mixed
_atom_sites_solution_primary      ?
_atom_sites_solution_secondary    ?
loop_
  _atom_site_label
  _atom_site_type_symbol
  _atom_site_fract_x
  _atom_site_fract_y
  _atom_site_fract_z
  _atom_site_U_iso_or_equiv
  _atom_site_adp_type
  _atom_site_occupancy
  _atom_site_site_symmetry_order
  _atom_site_calc_flag
  _atom_site_refinement_flags_posn
  _atom_site_refinement_flags_adp
  _atom_site_refinement_flags_occupancy
  _atom_site_disorder_assembly
  _atom_site_disorder_group
 Y1 Y 0.98979(4) 0.39860(2) 0.55716(3) 0.02425(19) Uani 1 1 d D . . . .
 O1 O 0.8395(4) 0.41305(18) 0.3886(3) 0.0422(9) Uani 1 1 d . . . . .
 O2 O 0.8364(4) 0.53414(16) 0.3238(3) 0.0387(8) Uani 1 1 d . . . . .
 O3 O 0.5942(4) 0.20821(16) 0.1625(3) 0.0401(8) Uani 1 1 d . . . . .
 O4 O 0.4443(5) 0.23400(18) 0.0081(3) 0.0516(10) Uani 1 1 d . . . . .
 O5 O 0.8819(3) 0.51605(17) 0.5747(3) 0.0360(7) Uani 1 1 d . . . . .
 O6 O 0.8085(5) 0.6334(2) 0.5553(4) 0.0608(11) Uani 1 1 d . . . . .
 O7 O 0.7881(17) 0.3645(12) 0.6430(16) 0.059(3) Uani 0.403(18) 1 d D U P A 1
 C1 C 0.7977(5) 0.4649(2) 0.3184(4) 0.0313(9) Uani 1 1 d . . . . .
 C2 C 0.6922(4) 0.4406(2) 0.2168(3) 0.0265(8) Uani 1 1 d . . . . .
 C3 C 0.6582(4) 0.3632(2) 0.2035(3) 0.0258(8) Uani 1 1 d . . . . .
 H3 H 0.6990 0.3276 0.2569 0.031 Uiso 1 1 calc R . . . .
 C4 C 0.5626(5) 0.3394(2) 0.1095(4) 0.0291(9) Uani 1 1 d . . . . .
 C5 C 0.5010(5) 0.3936(2) 0.0314(4) 0.0325(10) Uani 1 1 d . . . . .
 H5 H 0.4360 0.3774 -0.0304 0.039 Uiso 1 1 calc R . . . .
 C6 C 0.5332(5) 0.4708(2) 0.0428(3) 0.0267(8) Uani 1 1 d . . . . .
 C7 C 0.6307(5) 0.4936(2) 0.1373(4) 0.0284(9) Uani 1 1 d . . . . .
 H7 H 0.6546 0.5452 0.1469 0.034 Uiso 1 1 calc R . . . .
 C8 C 0.5306(5) 0.2558(2) 0.0921(4) 0.0329(9) Uani 1 1 d . . . . .
 C9 C 0.7951(7) 0.5699(3) 0.6001(5) 0.0559(15) Uani 1 1 d D . . . .
 C10 C 0.669(3) 0.5486(15) 0.667(3) 0.088(5) Uani 0.56(4) 1 d D U P B 1
 H10A H 0.5801 0.5450 0.6150 0.131 Uiso 0.56(4) 1 d R . P B 1
 H10B H 0.6560 0.5872 0.7240 0.131 Uiso 0.56(4) 1 d R . P B 1
 H10C H 0.6881 0.5001 0.7043 0.131 Uiso 0.56(4) 1 d R . P B 1
 C11 C 0.712(2) 0.3375(12) 0.7235(14) 0.064(3) Uani 0.403(18) 1 d D U P A 1
 C12 C 0.784(3) 0.2855(15) 0.818(2) 0.079(5) Uani 0.403(18) 1 d . U P A 1
 H12A H 0.8508 0.2485 0.7890 0.118 Uiso 0.403(18) 1 d R . P A 1
 H12B H 0.7066 0.2594 0.8535 0.118 Uiso 0.403(18) 1 d R . P A 1
 H12C H 0.8384 0.3180 0.8733 0.118 Uiso 0.403(18) 1 d R . P A 1
 N1 N 0.603(2) 0.2941(11) 0.6537(15) 0.075(3) Uani 0.403(18) 1 d D U P A 1
 C14 C 0.573(3) 0.3039(17) 0.5294(16) 0.088(5) Uani 0.403(18) 1 d D U P A 1
 H14A H 0.6130 0.3531 0.5115 0.132 Uiso 0.403(18) 1 d R . P A 1
 H14B H 0.4675 0.3038 0.5097 0.132 Uiso 0.403(18) 1 d R . P A 1
 H14C H 0.6186 0.2650 0.4857 0.132 Uiso 0.403(18) 1 d R . P A 1
 C15 C 0.511(3) 0.2391(15) 0.708(3) 0.089(5) Uani 0.403(18) 1 d D U P A 1
 H15A H 0.5566 0.1898 0.7206 0.134 Uiso 0.403(18) 1 d R . P A 1
 H15B H 0.4213 0.2337 0.6574 0.134 Uiso 0.403(18) 1 d R . P A 1
 H15C H 0.4869 0.2599 0.7807 0.134 Uiso 0.403(18) 1 d R . P A 1
 O7A O 0.8033(11) 0.3778(8) 0.6701(10) 0.054(2) Uani 0.597(18) 1 d D U P A 2
 C11A C 0.7301(13) 0.3240(8) 0.7133(12) 0.065(2) Uani 0.597(18) 1 d D U P A 2
 C12A C 0.751(2) 0.3124(12) 0.8377(11) 0.088(4) Uani 0.597(18) 1 d D U P A 2
 H12D H 0.8537 0.3152 0.8670 0.132 Uiso 0.597(18) 1 d R . P A 2
 H12E H 0.7109 0.2635 0.8570 0.132 Uiso 0.597(18) 1 d R . P A 2
 H12F H 0.6961 0.3525 0.8716 0.132 Uiso 0.597(18) 1 d R . P A 2
 N1A N 0.5789(12) 0.3175(8) 0.6751(11) 0.076(2) Uani 0.597(18) 1 d D U P A 2
 C14A C 0.5365(19) 0.3524(12) 0.5633(13) 0.098(4) Uani 0.597(18) 1 d D U P A 2
 H14D H 0.5906 0.3994 0.5575 0.147 Uiso 0.597(18) 1 d R . P A 2
 H14E H 0.4316 0.3631 0.5581 0.147 Uiso 0.597(18) 1 d R . P A 2
 H14F H 0.5579 0.3187 0.5015 0.147 Uiso 0.597(18) 1 d R . P A 2
 C15A C 0.4719(18) 0.2682(10) 0.7238(17) 0.088(4) Uani 0.597(18) 1 d D U P A 2
 H15D H 0.4303 0.2314 0.6684 0.132 Uiso 0.597(18) 1 d R . P A 2
 H15E H 0.3939 0.3000 0.7486 0.132 Uiso 0.597(18) 1 d R . P A 2
 H15F H 0.5203 0.2418 0.7893 0.132 Uiso 0.597(18) 1 d R . P A 2
 C10A C 0.718(4) 0.566(2) 0.706(2) 0.088(5) Uani 0.44(4) 1 d D U P B 2
 H10D H 0.7576 0.5244 0.7530 0.131 Uiso 0.44(4) 1 d R . P B 2
 H10E H 0.6131 0.5580 0.6866 0.131 Uiso 0.44(4) 1 d R . P B 2
 H10F H 0.7321 0.6133 0.7479 0.131 Uiso 0.44(4) 1 d R . P B 2

loop_
  _atom_site_aniso_label
  _atom_site_aniso_U_11
  _atom_site_aniso_U_22
  _atom_site_aniso_U_33
  _atom_site_aniso_U_23
  _atom_site_aniso_U_13
  _atom_site_aniso_U_12
 Y1 0.0301(3) 0.0086(3) 0.0305(3) 0.00283(10) -0.01717(17) -0.00211(10)
 O1 0.060(2) 0.0168(14) 0.0424(19) 0.0082(13) -0.0349(16) -0.0052(14)
 O2 0.0524(18) 0.0131(13) 0.0440(18) 0.0029(12) -0.0322(15) -0.0075(12)
 O3 0.060(2) 0.0109(13) 0.0428(18) -0.0001(12) -0.0294(15) 0.0003(13)
 O4 0.077(3) 0.0135(15) 0.055(2) -0.0008(14) -0.0453(19) -0.0010(15)
 O5 0.0403(16) 0.0205(15) 0.0472(18) 0.0044(13) 0.0040(13) 0.0094(12)
 O6 0.080(3) 0.033(2) 0.071(3) 0.0010(19) 0.017(2) 0.0274(19)
 O7 0.059(4) 0.041(5) 0.078(5) 0.023(4) 0.016(4) -0.019(4)
 C1 0.040(2) 0.0149(18) 0.035(2) 0.0042(15) -0.0217(17) -0.0027(16)
 C2 0.034(2) 0.0132(18) 0.0294(19) -0.0012(15) -0.0155(16) -0.0033(15)
 C3 0.0329(19) 0.0115(18) 0.0297(19) 0.0008(14) -0.0152(16) -0.0005(14)
 C4 0.038(2) 0.0130(19) 0.033(2) -0.0003(15) -0.0173(17) 0.0009(15)
 C5 0.045(3) 0.013(2) 0.034(2) -0.0023(15) -0.0261(19) -0.0017(15)
 C6 0.0344(19) 0.0146(19) 0.0273(19) 0.0015(15) -0.0177(16) 0.0018(16)
 C7 0.036(2) 0.0092(17) 0.036(2) 0.0019(15) -0.0203(17) -0.0041(14)
 C8 0.047(2) 0.0112(19) 0.037(2) -0.0011(16) -0.0209(19) 0.0033(16)
 C9 0.059(3) 0.045(3) 0.066(4) -0.003(3) 0.012(3) 0.026(3)
 C10 0.090(10) 0.090(9) 0.089(9) -0.007(8) 0.042(8) 0.026(7)
 C11 0.061(4) 0.053(4) 0.079(4) 0.020(4) 0.013(4) -0.004(4)
 C12 0.082(9) 0.069(9) 0.087(8) 0.028(7) 0.015(7) 0.011(7)
 N1 0.064(4) 0.071(5) 0.092(5) 0.011(4) 0.009(4) -0.005(4)
 C14 0.069(8) 0.099(10) 0.094(8) 0.013(8) -0.008(7) -0.013(8)
 C15 0.075(9) 0.084(9) 0.110(9) 0.007(8) 0.017(8) -0.021(8)
 O7A 0.057(3) 0.046(4) 0.060(4) 0.021(3) 0.007(3) -0.014(3)
 C11A 0.065(4) 0.052(4) 0.081(4) 0.019(3) 0.014(3) -0.008(3)
 C12A 0.102(8) 0.081(9) 0.083(7) 0.018(6) 0.021(6) -0.002(7)
 N1A 0.066(4) 0.070(5) 0.092(4) 0.003(4) 0.012(4) -0.010(4)
 C14A 0.084(7) 0.105(9) 0.102(8) 0.013(7) -0.001(6) -0.011(7)
 C15A 0.067(7) 0.086(8) 0.115(8) 0.001(7) 0.027(6) -0.023(6)
 C10A 0.090(10) 0.090(9) 0.089(9) -0.007(8) 0.042(8) 0.026(7)

_geom_special_details
;
 All esds (except the esd in the dihedral angle between two l.s. planes)
 are estimated using the full covariance matrix.  The cell esds are taken
 into account individually in the estimation of esds in distances, angles
 and torsion angles; correlations between esds in cell parameters are only
 used when they are defined by crystal symmetry.  An approximate (isotropic)
 treatment of cell esds is used for estimating esds involving l.s. planes.
;
loop_
  _geom_bond_atom_site_label_1
  _geom_bond_atom_site_label_2
  _geom_bond_distance
  _geom_bond_site_symmetry_2
  _geom_bond_publ_flag
 Y1 Y1 3.7883(6) 3_766 ?
 Y1 O1 2.293(3) . ?
 Y1 O2 2.314(3) 3_766 ?
 Y1 O3 2.376(3) 4_666 ?
 Y1 O4 2.409(3) 4_666 ?
 Y1 O5 2.285(3) . ?
 Y1 O5 2.492(3) 3_766 ?
 Y1 O6 2.396(4) 3_766 ?
 Y1 O7 2.230(8) . ?
 Y1 C8 2.743(4) 4_666 ?
 Y1 C9 2.832(6) 3_766 ?
 Y1 O7A 2.251(7) . ?
 O1 C1 1.253(5) . ?
 O2 Y1 2.314(3) 3_766 ?
 O2 C1 1.257(5) . ?
 O3 Y1 2.376(3) 4_565 ?
 O3 C8 1.265(5) . ?
 O4 Y1 2.409(3) 4_565 ?
 O4 C8 1.252(6) . ?
 O5 Y1 2.492(3) 3_766 ?
 O5 C9 1.273(6) . ?
 O6 Y1 2.396(4) 3_766 ?
 O6 C9 1.235(8) . ?
 O7 C11 1.298(10) . ?
 C1 C2 1.509(5) . ?
 C2 C3 1.389(6) . ?
 C2 C7 1.387(5) . ?
 C3 H3 0.9300 . ?
 C3 C4 1.392(5) . ?
 C4 C5 1.391(6) . ?
 C4 C8 1.498(5) . ?
 C5 H5 0.9300 . ?
 C5 C6 1.381(6) . ?
 C6 C6 1.508(7) 3_665 ?
 C6 C7 1.401(5) . ?
 C7 H7 0.9300 . ?
 C8 Y1 2.743(4) 4_565 ?
 C9 Y1 2.832(6) 3_766 ?
 C9 C10 1.479(9) . ?
 C9 C10A 1.468(9) . ?
 C10 H10A 0.9601 . ?
 C10 H10B 0.9600 . ?
 C10 H10C 0.9600 . ?
 C11 C12 1.52(3) . ?
 C11 N1 1.430(10) . ?
 C12 H12A 0.9600 . ?
 C12 H12B 0.9600 . ?
 C12 H12C 0.9598 . ?
 N1 C14 1.454(10) . ?
 N1 C15 1.451(10) . ?
 C14 H14A 0.9601 . ?
 C14 H14B 0.9601 . ?
 C14 H14C 0.9599 . ?
 C15 H15A 0.9603 . ?
 C15 H15B 0.9600 . ?
 C15 H15C 0.9598 . ?
 O7A C11A 1.275(9) . ?
 C11A C12A 1.453(10) . ?
 C11A N1A 1.400(9) . ?
 C12A H12D 0.9602 . ?
 C12A H12E 0.9599 . ?
 C12A H12F 0.9599 . ?
 N1A C14A 1.453(9) . ?
 N1A C15A 1.444(9) . ?
 C14A H14D 0.9599 . ?
 C14A H14E 0.9599 . ?
 C14A H14F 0.9603 . ?
 C15A H15D 0.9597 . ?
 C15A H15E 0.9600 . ?
 C15A H15F 0.9598 . ?
 C10A H10D 0.9600 . ?
 C10A H10E 0.9599 . ?
 C10A H10F 0.9601 . ?

loop_
  _geom_angle_atom_site_label_1
  _geom_angle_atom_site_label_2
  _geom_angle_atom_site_label_3
  _geom_angle
  _geom_angle_site_symmetry_1
  _geom_angle_site_symmetry_3
  _geom_angle_publ_flag
 O1 Y1 Y1 69.01(8) . 3_766 ?
 O1 Y1 O2 140.46(11) . 3_766 ?
 O1 Y1 O3 134.61(11) . 4_666 ?
 O1 Y1 O4 80.11(11) . 4_666 ?
 O1 Y1 O5 71.44(12) . 3_766 ?
 O1 Y1 O6 88.88(16) . 3_766 ?
 O1 Y1 C8 107.19(12) . 4_666 ?
 O1 Y1 C9 79.36(17) . 3_766 ?
 O2 Y1 Y1 71.60(7) 3_766 3_766 ?
 O2 Y1 O3 82.77(10) 3_766 4_666 ?
 O2 Y1 O4 136.07(11) 3_766 4_666 ?
 O2 Y1 O5 74.75(11) 3_766 3_766 ?
 O2 Y1 O6 86.39(15) 3_766 3_766 ?
 O2 Y1 C8 109.54(11) 3_766 4_666 ?
 O2 Y1 C9 79.64(17) 3_766 3_766 ?
 O3 Y1 Y1 151.99(8) 4_666 3_766 ?
 O3 Y1 O4 54.57(10) 4_666 4_666 ?
 O3 Y1 O5 126.86(12) 4_666 3_766 ?
 O3 Y1 O6 79.17(14) 4_666 3_766 ?
 O3 Y1 C8 27.44(11) 4_666 4_666 ?
 O3 Y1 C9 102.76(15) 4_666 3_766 ?
 O4 Y1 Y1 145.73(9) 4_666 3_766 ?
 O4 Y1 O5 120.47(13) 4_666 3_766 ?
 O4 Y1 C8 27.14(12) 4_666 4_666 ?
 O4 Y1 C9 98.39(17) 4_666 3_766 ?
 O5 Y1 Y1 39.48(8) . 3_766 ?
 O5 Y1 Y1 35.66(7) 3_766 3_766 ?
 O5 Y1 O1 75.72(12) . . ?
 O5 Y1 O2 76.32(12) . 3_766 ?
 O5 Y1 O3 144.06(12) . 4_666 ?
 O5 Y1 O4 144.80(13) . 4_666 ?
 O5 Y1 O5 75.14(12) . 3_766 ?
 O5 Y1 O6 127.40(13) . 3_766 ?
 O5 Y1 C8 127.86(13) 3_766 4_666 ?
 O5 Y1 C8 156.88(13) . 4_666 ?
 O5 Y1 C9 101.81(14) . 3_766 ?
 O5 Y1 C9 26.71(13) 3_766 3_766 ?
 O6 Y1 Y1 87.96(10) 3_766 3_766 ?
 O6 Y1 O4 76.63(16) 3_766 4_666 ?
 O6 Y1 O5 52.34(12) 3_766 3_766 ?
 O6 Y1 C8 75.71(15) 3_766 4_666 ?
 O6 Y1 C9 25.63(15) 3_766 3_766 ?
 O7 Y1 Y1 118.2(6) . 3_766 ?
 O7 Y1 O1 88.1(6) . . ?
 O7 Y1 O2 113.8(5) . 3_766 ?
 O7 Y1 O3 82.1(6) . 4_666 ?
 O7 Y1 O4 73.8(6) . 4_666 ?
 O7 Y1 O5 80.1(6) . . ?
 O7 Y1 O5 151.0(6) . 3_766 ?
 O7 Y1 O6 150.4(6) . 3_766 ?
 O7 Y1 C8 77.1(6) . 4_666 ?
 O7 Y1 C9 166.3(6) . 3_766 ?
 C8 Y1 Y1 163.42(11) 4_666 3_766 ?
 C8 Y1 C9 101.26(16) 4_666 3_766 ?
 C9 Y1 Y1 62.34(11) 3_766 3_766 ?
 O7A Y1 Y1 114.6(4) . 3_766 ?
 O7A Y1 O1 95.7(3) . . ?
 O7A Y1 O2 103.6(3) . 3_766 ?
 O7A Y1 O3 81.8(4) . 4_666 ?
 O7A Y1 O4 82.1(4) . 4_666 ?
 O7A Y1 O5 149.9(4) . 3_766 ?
 O7A Y1 O5 75.3(4) . . ?
 O7A Y1 O6 157.1(4) . 3_766 ?
 O7A Y1 C8 81.5(4) . 4_666 ?
 O7A Y1 C9 174.8(4) . 3_766 ?
 C1 O1 Y1 139.0(3) . . ?
 C1 O2 Y1 133.4(3) . 3_766 ?
 C8 O3 Y1 92.7(2) . 4_565 ?
 C8 O4 Y1 91.5(2) . 4_565 ?
 Y1 O5 Y1 104.86(12) . 3_766 ?
 C9 O5 Y1 163.2(4) . . ?
 C9 O5 Y1 91.7(3) . 3_766 ?
 C9 O6 Y1 97.3(3) . 3_766 ?
 C11 O7 Y1 157.6(17) . . ?
 O1 C1 O2 126.5(4) . . ?
 O1 C1 C2 115.9(4) . . ?
 O2 C1 C2 117.6(3) . . ?
 C3 C2 C1 118.5(3) . . ?
 C7 C2 C1 121.3(3) . . ?
 C7 C2 C3 120.2(3) . . ?
 C2 C3 H3 120.3 . . ?
 C2 C3 C4 119.5(4) . . ?
 C4 C3 H3 120.3 . . ?
 C3 C4 C8 119.7(4) . . ?
 C5 C4 C3 119.4(4) . . ?
 C5 C4 C8 120.9(4) . . ?
 C4 C5 H5 118.9 . . ?
 C6 C5 C4 122.1(4) . . ?
 C6 C5 H5 118.9 . . ?
 C5 C6 C6 121.8(4) . 3_665 ?
 C5 C6 C7 117.6(4) . . ?
 C7 C6 C6 120.6(4) . 3_665 ?
 C2 C7 C6 121.2(3) . . ?
 C2 C7 H7 119.4 . . ?
 C6 C7 H7 119.4 . . ?
 O3 C8 Y1 59.9(2) . 4_565 ?
 O3 C8 C4 118.8(4) . . ?
 O4 C8 Y1 61.4(2) . 4_565 ?
 O4 C8 O3 121.2(4) . . ?
 O4 C8 C4 120.0(4) . . ?
 C4 C8 Y1 176.5(3) . 4_565 ?
 O5 C9 Y1 61.6(3) . 3_766 ?
 O5 C9 C10 116.9(11) . . ?
 O5 C9 C10A 120.5(13) . . ?
 O6 C9 Y1 57.1(3) . 3_766 ?
 O6 C9 O5 118.7(5) . . ?
 O6 C9 C10 123.7(10) . . ?
 O6 C9 C10A 117.7(14) . . ?
 C10 C9 Y1 171.2(15) . 3_766 ?
 C10A C9 Y1 162.2(19) . 3_766 ?
 C9 C10 H10A 109.1 . . ?
 C9 C10 H10B 109.3 . . ?
 C9 C10 H10C 110.1 . . ?
 H10A C10 H10B 109.5 . . ?
 H10A C10 H10C 109.5 . . ?
 H10B C10 H10C 109.5 . . ?
 O7 C11 C12 121(2) . . ?
 O7 C11 N1 99.5(15) . . ?
 N1 C11 C12 109(2) . . ?
 C11 C12 H12A 113.2 . . ?
 C11 C12 H12B 108.1 . . ?
 C11 C12 H12C 107.0 . . ?
 H12A C12 H12B 109.5 . . ?
 H12A C12 H12C 109.5 . . ?
 H12B C12 H12C 109.5 . . ?
 C11 N1 C14 123.9(16) . . ?
 C11 N1 C15 119.6(17) . . ?
 C15 N1 C14 116.5(19) . . ?
 N1 C14 H14A 106.2 . . ?
 N1 C14 H14B 109.2 . . ?
 N1 C14 H14C 113.0 . . ?
 H14A C14 H14B 109.4 . . ?
 H14A C14 H14C 109.5 . . ?
 H14B C14 H14C 109.5 . . ?
 N1 C15 H15A 113.7 . . ?
 N1 C15 H15B 106.3 . . ?
 N1 C15 H15C 108.3 . . ?
 H15A C15 H15B 109.4 . . ?
 H15A C15 H15C 109.5 . . ?
 H15B C15 H15C 109.5 . . ?
 C11A O7A Y1 141.9(12) . . ?
 O7A C11A C12A 117.9(14) . . ?
 O7A C11A N1A 117.3(11) . . ?
 N1A C11A C12A 109.8(14) . . ?
 C11A C12A H12D 112.4 . . ?
 C11A C12A H12E 109.7 . . ?
 C11A C12A H12F 106.2 . . ?
 H12D C12A H12E 109.5 . . ?
 H12D C12A H12F 109.5 . . ?
 H12E C12A H12F 109.5 . . ?
 C11A N1A C14A 114.9(11) . . ?
 C11A N1A C15A 126.1(12) . . ?
 C15A N1A C14A 117.8(13) . . ?
 N1A C14A H14D 109.0 . . ?
 N1A C14A H14E 108.5 . . ?
 N1A C14A H14F 110.9 . . ?
 H14D C14A H14E 109.5 . . ?
 H14D C14A H14F 109.5 . . ?
 H14E C14A H14F 109.5 . . ?
 N1A C15A H15D 111.8 . . ?
 N1A C15A H15E 107.7 . . ?
 N1A C15A H15F 108.8 . . ?
 H15D C15A H15E 109.5 . . ?
 H15D C15A H15F 109.5 . . ?
 H15E C15A H15F 109.5 . . ?
 C9 C10A H10D 109.1 . . ?
 C9 C10A H10E 109.9 . . ?
 C9 C10A H10F 109.4 . . ?
 H10D C10A H10E 109.5 . . ?
 H10D C10A H10F 109.5 . . ?
 H10E C10A H10F 109.5 . . ?

_shelx_fab_file
;
 2 0 0 18.02 0.00
 4 0 0 1.79 -0.05
 6 0 0 2.75 0.01
 8 0 0 0.56 -0.02
 10 0 0 0.18 0.01
 1 1 0 -38.07 0.01
 2 1 0 -10.97 0.00
 3 1 0 -5.90 0.06
 4 1 0 0.78 -0.13
 5 1 0 -2.81 0.06
 6 1 0 -0.48 -0.04
 7 1 0 -1.00 -0.01
 8 1 0 -0.19 -0.02
 9 1 0 -0.30 0.00
 10 1 0 -0.07 0.01
 11 1 0 -0.17 0.00
 0 2 0 26.08 -0.01
 1 2 0 11.77 0.00
 2 2 0 17.79 -0.01
 3 2 0 5.98 0.06
 4 2 0 5.40 -0.11
 5 2 0 0.78 0.06
 6 2 0 -0.11 0.01
 7 2 0 -0.05 0.03
 8 2 0 0.97 0.00
 9 2 0 0.29 0.00
 10 2 0 0.00 0.01
 11 2 0 0.15 0.01
 1 3 0 -10.75 0.00
 2 3 0 -5.46 -0.02
 3 3 0 -11.42 0.06
 4 3 0 -5.38 -0.03
 5 3 0 -0.68 0.05
 6 3 0 -0.12 -0.01
 7 3 0 -0.58 0.00
 8 3 0 0.24 -0.02
 9 3 0 -0.18 -0.01
 10 3 0 -0.27 0.00
 11 3 0 -0.02 0.00
 0 4 0 3.72 -0.01
 1 4 0 -3.44 0.00
 2 4 0 6.00 -0.01
 3 4 0 4.12 0.02
 4 4 0 2.38 -0.04
 5 4 0 3.87 -0.02
 6 4 0 1.84 -0.01
 7 4 0 -1.42 0.02
 8 4 0 -0.19 0.00
 9 4 0 0.54 0.00
 10 4 0 0.08 0.00
 1 5 0 -3.52 0.00
 2 5 0 1.51 -0.01
 3 5 0 3.05 0.00
 4 5 0 -3.55 0.02
 5 5 0 -3.14 0.01
 6 5 0 0.36 -0.01
 7 5 0 -0.89 0.00
 8 5 0 -0.39 -0.01
 9 5 0 0.33 0.00
 10 5 0 0.07 0.00
 0 6 0 4.43 0.01
 1 6 0 2.19 0.00
 2 6 0 -3.61 0.00
 3 6 0 1.22 -0.01
 4 6 0 -0.87 0.01
 5 6 0 -1.80 0.00
 6 6 0 2.54 0.00
 7 6 0 1.47 0.00
 8 6 0 -0.33 -0.01
 9 6 0 -0.25 0.01
 10 6 0 0.02 0.01
 1 7 0 2.47 0.01
 2 7 0 -4.78 0.00
 3 7 0 0.48 -0.01
 4 7 0 3.67 0.00
 5 7 0 -0.46 0.00
 7 7 0 -0.19 -0.01
 8 7 0 -0.09 0.00
 9 7 0 -0.19 0.01
 10 7 0 -0.26 0.00
 0 8 0 -7.87 0.00
 1 8 0 1.79 0.01
 2 8 0 0.45 0.00
 3 8 0 -1.03 -0.01
 4 8 0 1.30 0.00
 5 8 0 -0.06 0.01
 6 8 0 -1.76 0.02
 7 8 0 0.22 0.00
 8 8 0 0.90 -0.01
 9 8 0 -0.14 0.00
 10 8 0 -0.39 0.01
 1 9 0 3.71 0.00
 2 9 0 3.54 0.00
 3 9 0 -2.21 0.00
 4 9 0 -1.54 0.00
 5 9 0 2.24 0.00
 6 9 0 -0.27 0.01
 7 9 0 -0.47 0.00
 8 9 0 0.93 0.00
 9 9 0 0.48 0.00
 0 10 0 0.37 0.00
 1 10 0 -4.08 0.00
 2 10 0 -0.81 0.00
 3 10 0 -0.14 0.00
 4 10 0 -1.83 0.00
 5 10 0 1.41 0.00
 6 10 0 0.04 0.00
 7 10 0 -1.13 -0.02
 8 10 0 -0.38 0.00
 9 10 0 0.01 -0.01
 1 11 0 -2.18 0.00
 2 11 0 -0.14 0.00
 3 11 0 3.31 0.00
 4 11 0 -0.48 0.00
 5 11 0 -0.30 0.00
 6 11 0 0.66 0.01
 7 11 0 0.35 0.00
 8 11 0 -0.17 0.02
 9 11 0 0.22 0.00
 0 12 0 2.65 0.01
 1 12 0 3.03 0.00
 2 12 0 -1.10 -0.01
 3 12 0 1.00 0.00
 4 12 0 0.26 0.01
 5 12 0 -1.35 0.01
 6 12 0 -0.22 -0.01
 7 12 0 0.86 -0.03
 8 12 0 -0.16 0.00
 1 13 0 0.88 0.00
 2 13 0 -2.48 0.00
 3 13 0 -1.50 -0.01
 4 13 0 1.02 0.00
 5 13 0 -0.48 0.00
 6 13 0 -0.86 0.01
 7 13 0 0.46 -0.01
 8 13 0 0.23 0.00
 0 14 0 -2.30 0.01
 1 14 0 -0.48 0.01
 2 14 0 0.44 0.00
 3 14 0 -0.25 -0.02
 4 14 0 1.40 0.00
 5 14 0 1.05 0.01
 6 14 0 -0.16 0.00
 7 14 0 -0.04 -0.01
 8 14 0 0.49 -0.01
 1 15 0 0.29 0.00
 2 15 0 2.03 0.01
 3 15 0 0.33 0.00
 4 15 0 -1.15 0.00
 5 15 0 -0.69 0.00
 6 15 0 -0.18 0.00
 7 15 0 -0.45 0.00
 0 16 0 1.92 0.00
 1 16 0 -1.01 0.00
 2 16 0 -1.48 0.00
 3 16 0 0.22 0.00
 4 16 0 -0.03 -0.01
 5 16 0 -0.01 0.00
 6 16 0 0.81 0.00
 7 16 0 -0.05 0.00
 1 17 0 -0.14 0.00
 2 17 0 -1.08 0.00
 3 17 0 0.79 0.01
 4 17 0 0.58 0.00
 5 17 0 -1.06 0.00
 6 17 0 -0.02 0.00
 0 18 0 -0.88 0.00
 1 18 0 1.31 0.00
 2 18 0 -0.37 -0.01
 3 18 0 -0.15 0.00
 4 18 0 1.38 0.00
 5 18 0 -0.10 0.00
 6 18 0 -0.41 0.00
 1 19 0 1.09 0.00
 2 19 0 0.23 -0.01
 3 19 0 -1.26 0.00
 4 19 0 0.08 0.01
 5 19 0 -0.19 0.00
 0 20 0 -0.66 0.01
 1 20 0 -0.77 0.01
 2 20 0 0.14 -0.01
 3 20 0 -0.41 0.00
 -11 0 1 0.07 0.00
 -9 0 1 0.33 0.01
 -7 0 1 0.88 -0.01
 -5 0 1 5.52 0.04
 -3 0 1 6.46 0.00
 -1 0 1 37.49 0.01
 1 0 1 39.35 -0.01
 3 0 1 -0.84 -0.02
 5 0 1 0.41 -0.02
 7 0 1 1.47 0.00
 9 0 1 -0.07 0.00
 11 0 1 0.47 0.00
 -11 1 1 0.23 0.00
 -10 1 1 0.04 -0.01
 -9 1 1 0.03 0.02
 -8 1 1 -0.88 -0.01
 -7 1 1 0.28 -0.04
 -6 1 1 -2.00 -0.01
 -5 1 1 1.48 0.09
 -4 1 1 -5.91 0.00
 -3 1 1 1.88 0.03
 -2 1 1 -18.60 0.00
 -1 1 1 11.23 -0.01
 0 1 1 -41.59 0.01
 1 1 1 -6.52 0.01
 2 1 1 -13.57 0.00
 3 1 1 -5.76 -0.06
 4 1 1 0.23 0.09
 5 1 1 2.20 -0.07
 6 1 1 -0.86 -0.01
 7 1 1 -0.51 -0.02
 8 1 1 -0.51 0.01
 9 1 1 -0.22 0.01
 10 1 1 -0.25 -0.01
 11 1 1 0.01 -0.01
 -11 2 1 0.01 0.00
 -10 2 1 -0.29 -0.02
 -9 2 1 0.12 0.02
 -8 2 1 0.26 0.03
 -7 2 1 1.50 0.00
 -6 2 1 -1.67 0.01
 -5 2 1 1.72 0.01
 -4 2 1 -2.90 -0.05
 -3 2 1 12.23 -0.03
 -2 2 1 -10.28 0.00
 -1 2 1 25.56 0.00
 0 2 1 -3.95 0.01
 1 2 1 15.52 0.00
 2 2 1 11.50 0.01
 3 2 1 7.03 -0.07
 4 2 1 0.76 0.07
 5 2 1 0.95 -0.05
 6 2 1 -0.74 0.03
 7 2 1 -0.41 0.00
 8 2 1 0.59 0.02
 9 2 1 0.53 0.01
 10 2 1 -0.04 -0.01
 -11 3 1 0.01 0.00
 -10 3 1 0.16 -0.01
 -9 3 1 0.52 0.01
 -8 3 1 -0.59 0.00
 -7 3 1 -0.75 -0.05
 -6 3 1 -1.37 -0.01
 -5 3 1 4.09 0.02
 -4 3 1 -4.01 0.01
 -3 3 1 7.45 0.01
 -2 3 1 -17.07 0.00
 -1 3 1 3.62 -0.01
 0 3 1 -7.95 0.01
 1 3 1 -3.70 0.00
 2 3 1 -5.75 0.01
 3 3 1 -2.77 -0.05
 4 3 1 -5.67 0.08
 5 3 1 -2.01 -0.01
 6 3 1 1.11 0.00
 7 3 1 0.85 -0.04
 8 3 1 -0.36 0.00
 9 3 1 -0.42 0.00
 10 3 1 -0.20 0.01
 -10 4 1 0.09 -0.01
 -9 4 1 -0.24 0.00
 -8 4 1 -0.43 0.02
 -7 4 1 0.84 -0.01
 -6 4 1 0.11 0.01
 -5 4 1 2.67 0.00
 -4 4 1 -7.68 -0.01
 -3 4 1 4.73 0.01
 -2 4 1 -1.82 0.01
 -1 4 1 6.50 -0.01
 0 4 1 4.04 0.00
 1 4 1 2.36 0.00
 2 4 1 -3.48 0.02
 3 4 1 3.32 -0.03
 4 4 1 3.57 0.00
 5 4 1 1.14 -0.02
 6 4 1 0.26 0.02
 7 4 1 0.52 0.00
 8 4 1 -0.39 0.02
 9 4 1 -0.03 0.00
 10 4 1 0.23 0.00
 -10 5 1 -0.01 0.00
 -9 5 1 -0.10 -0.01
 -8 5 1 0.76 0.00
 -7 5 1 0.88 -0.01
 -6 5 1 -2.79 0.01
 -5 5 1 1.41 0.01
 -4 5 1 -1.61 -0.01
 -3 5 1 4.23 0.00
 -2 5 1 2.39 0.00
 -1 5 1 -3.17 0.00
 0 5 1 -5.02 0.00
 1 5 1 1.56 0.00
 2 5 1 -1.79 0.00
 3 5 1 0.18 0.00
 4 5 1 2.10 0.01
 5 5 1 -1.08 0.00
 6 5 1 -3.02 0.00
 7 5 1 0.54 -0.02
 8 5 1 0.34 0.01
 9 5 1 -0.36 -0.01
 10 5 1 -0.14 0.00
 -10 6 1 0.06 0.00
 -9 6 1 -0.10 0.01
 -8 6 1 -0.27 0.00
 -7 6 1 -0.01 0.00
 -6 6 1 -1.87 -0.01
 -5 6 1 2.84 0.00
 -4 6 1 1.51 -0.01
 -3 6 1 -3.47 0.00
 -2 6 1 -2.16 0.01
 -1 6 1 -1.52 0.01
 0 6 1 -2.01 -0.01
 1 6 1 4.88 0.00
 2 6 1 2.83 0.00
 3 6 1 -3.36 0.01
 4 6 1 -0.97 0.00
 5 6 1 1.55 0.00
 6 6 1 -1.06 0.01
 7 6 1 1.06 0.00
 8 6 1 0.76 0.01
 9 6 1 -0.17 0.00
 10 6 1 -0.02 0.00
 -10 7 1 0.51 0.00
 -9 7 1 -0.40 0.00
 -8 7 1 -0.55 -0.01
 -7 7 1 1.48 0.00
 -6 7 1 0.20 0.01
 -5 7 1 -0.39 0.01
 -4 7 1 -0.20 0.00
 -3 7 1 -2.28 -0.01
 -2 7 1 1.78 0.01
 -1 7 1 6.00 0.01
 0 7 1 1.53 0.00
 1 7 1 -1.95 0.00
 2 7 1 0.61 0.00
 3 7 1 -2.39 0.01
 4 7 1 -1.11 0.00
 5 7 1 3.41 -0.01
 6 7 1 -0.38 -0.01
 7 7 1 -1.19 0.00
 8 7 1 -0.12 0.01
 9 7 1 0.20 0.00
 10 7 1 -0.05 -0.01
 -10 8 1 -0.36 0.00
 -9 8 1 -0.43 0.01
 -8 8 1 0.52 -0.01
 -7 8 1 0.90 -0.01
 -6 8 1 -0.89 0.01
 -5 8 1 -2.26 0.00
 -4 8 1 1.02 0.00
 -3 8 1 2.20 -0.01
 -2 8 1 -0.20 0.00
 -1 8 1 -2.09 0.00
 0 8 1 -1.74 0.00
 1 8 1 -5.56 -0.01
 2 8 1 1.56 0.00
 3 8 1 3.42 0.00
 4 8 1 -1.71 0.01
 5 8 1 -0.13 0.00
 6 8 1 0.69 -0.01
 7 8 1 -0.52 0.00
 8 8 1 -0.63 0.00
 9 8 1 0.16 0.00
 -9 9 1 0.15 0.00
 -8 9 1 -0.08 0.00
 -7 9 1 -0.99 0.00
 -6 9 1 0.42 0.00
 -5 9 1 0.75 0.00
 -4 9 1 1.01 -0.01
 -3 9 1 0.37 0.00
 -2 9 1 -1.36 0.00
 -1 9 1 -3.57 0.00
 0 9 1 4.64 0.01
 1 9 1 1.77 0.00
 2 9 1 0.18 0.00
 3 9 1 2.34 0.00
 4 9 1 -1.33 0.00
 5 9 1 -2.09 0.00
 6 9 1 1.67 0.00
 7 9 1 0.86 0.01
 8 9 1 -0.44 0.00
 9 9 1 0.11 0.01
 -9 10 1 -0.42 0.00
 -8 10 1 0.01 0.00
 -7 10 1 -0.19 -0.01
 -6 10 1 1.16 0.00
 -5 10 1 0.03 0.01
 -4 10 1 -1.53 0.00
 -3 10 1 -1.74 0.01
 -2 10 1 2.43 0.00
 -1 10 1 -0.79 -0.01
 0 10 1 2.28 0.00
 1 10 1 1.05 0.00
 2 10 1 -3.93 0.00
 3 10 1 -0.82 0.00
 4 10 1 1.82 0.00
 5 10 1 -1.66 0.00
 6 10 1 0.21 -0.02
 7 10 1 0.51 0.00
 8 10 1 -0.73 -0.02
 9 10 1 -0.63 0.00
 -9 11 1 -0.77 -0.01
 -8 11 1 0.50 0.00
 -7 11 1 0.45 0.01
 -6 11 1 0.11 0.00
 -5 11 1 -1.11 0.00
 -4 11 1 0.02 -0.02
 -3 11 1 -0.21 0.00
 -2 11 1 3.25 0.01
 -1 11 1 -0.38 0.00
 0 11 1 -3.66 -0.01
 1 11 1 0.14 0.00
 2 11 1 -0.26 0.00
 3 11 1 -1.30 0.00
 4 11 1 2.68 -0.01
 5 11 1 -0.24 0.00
 6 11 1 -0.64 0.01
 7 11 1 0.53 0.03
 8 11 1 0.49 0.00
 9 11 1 -0.20 0.00
 -8 12 1 0.24 -0.01
 -7 12 1 -0.83 0.00
 -6 12 1 -0.63 0.00
 -5 12 1 0.38 0.01
 -4 12 1 2.13 0.00
 -3 12 1 -0.65 0.00
 -2 12 1 -1.53 0.00
 -1 12 1 0.21 0.00
 0 12 1 -1.92 0.00
 1 12 1 1.61 0.00
 2 12 1 4.01 0.00
 3 12 1 -1.58 0.01
 4 12 1 0.06 0.00
 5 12 1 0.70 -0.01
 6 12 1 -0.58 -0.02
 7 12 1 -0.51 0.00
 8 12 1 0.47 -0.01
 -8 13 1 -0.57 -0.01
 -7 13 1 0.22 0.00
 -6 13 1 0.82 0.01
 -5 13 1 0.11 -0.01
 -4 13 1 -0.82 -0.01
 -3 13 1 -0.83 0.00
 -2 13 1 -1.18 0.00
 -1 13 1 2.74 0.01
 0 13 1 1.20 -0.01
 1 13 1 -1.45 -0.01
 2 13 1 1.23 0.00
 3 13 1 -1.60 0.01
 4 13 1 -1.81 0.00
 5 13 1 0.65 0.00
 6 13 1 0.32 0.00
 7 13 1 -0.70 0.02
 8 13 1 -0.09 0.01
 -8 14 1 0.29 -0.01
 -7 14 1 0.24 -0.01
 -6 14 1 -0.11 0.02
 -5 14 1 0.12 0.01
 -4 14 1 -0.82 0.00
 -3 14 1 1.17 0.00
 -2 14 1 0.29 0.00
 -1 14 1 0.18 0.01
 0 14 1 0.03 0.00
 1 14 1 -2.96 0.00
 2 14 1 -0.63 -0.01
 3 14 1 1.14 0.01
 4 14 1 0.02 0.01
 5 14 1 0.55 -0.01
 6 14 1 1.07 -0.02
 7 14 1 0.07 0.00
 8 14 1 -0.47 0.01
 -7 15 1 -0.33 -0.01
 -6 15 1 -0.74 0.00
 -5 15 1 0.27 0.00
 -4 15 1 -0.37 0.00
 -3 15 1 0.98 -0.01
 -2 15 1 0.35 -0.01
 -1 15 1 -1.96 0.00
 0 15 1 0.16 0.00
 1 15 1 1.65 0.00
 2 15 1 1.12 -0.01
 3 15 1 1.19 0.01
 4 15 1 0.02 0.01
 5 15 1 -1.35 0.00
 6 15 1 -0.43 0.00
 7 15 1 0.31 0.00
 -7 16 1 -0.51 -0.01
 -6 16 1 0.18 0.00
 -5 16 1 1.32 0.01
 -4 16 1 -0.05 0.00
 -3 16 1 -1.09 -0.01
 -2 16 1 -0.25 0.00
 -1 16 1 0.11 0.00
 0 16 1 0.14 0.01
 1 16 1 0.70 0.00
 2 16 1 -1.27 -0.01
 3 16 1 -1.85 -0.01
 4 16 1 0.70 0.01
 5 16 1 0.40 0.00
 6 16 1 -0.18 -0.01
 7 16 1 0.46 -0.01
 -6 17 1 0.44 -0.01
 -5 17 1 -0.36 0.00
 -4 17 1 -1.00 0.01
 -3 17 1 -0.02 0.00
 -2 17 1 0.90 0.00
 -1 17 1 1.38 -0.01
 0 17 1 -0.96 0.00
 1 17 1 -0.34 0.00
 2 17 1 1.35 0.01
 3 17 1 -0.74 0.00
 4 17 1 -0.14 0.00
 5 17 1 0.44 0.00
 6 17 1 -0.47 0.00
 -6 18 1 -0.39 -0.01
 -5 18 1 -0.12 0.00
 -4 18 1 0.29 0.00
 -3 18 1 1.05 0.00
 -2 18 1 -0.71 0.00
 -1 18 1 -0.32 0.00
 0 18 1 -0.50 0.00
 1 18 1 -1.24 -0.01
 2 18 1 1.33 0.01
 3 18 1 0.38 -0.01
 4 18 1 -0.50 0.00
 5 18 1 1.03 0.00
 -5 19 1 0.60 0.00
 -4 19 1 -0.30 0.00
 -3 19 1 -0.07 0.00
 -2 19 1 -0.55 0.00
 -1 19 1 -0.20 0.00
 0 19 1 1.43 0.00
 1 19 1 -0.43 -0.01
 2 19 1 0.12 0.01
 3 19 1 0.57 0.00
 4 19 1 -1.64 0.00
 -3 20 1 -0.35 0.00
 -2 20 1 0.74 0.00
 -1 20 1 -0.33 0.01
 0 20 1 0.58 0.00
 1 20 1 -0.24 -0.01
 2 20 1 -0.95 0.01
 3 20 1 1.14 0.00
 -1 21 1 -0.45 0.01
 0 21 1 -0.55 0.00
 1 21 1 0.40 -0.01
 -10 0 2 0.08 0.00
 -8 0 2 0.59 0.00
 -6 0 2 1.13 0.00
 -4 0 2 7.60 0.01
 -2 0 2 12.38 0.00
 0 0 2 30.57 -0.01
 2 0 2 10.38 0.02
 4 0 2 -4.82 -0.03
 6 0 2 0.90 0.03
 8 0 2 0.46 -0.01
 10 0 2 -0.06 0.01
 -11 1 2 -0.15 -0.01
 -10 1 2 0.27 0.01
 -9 1 2 -0.20 -0.03
 -8 1 2 -0.38 0.00
 -7 1 2 -0.71 0.02
 -6 1 2 1.60 0.01
 -5 1 2 -3.66 -0.02
 -4 1 2 1.40 0.03
 -3 1 2 -9.01 0.02
 -2 1 2 3.39 0.00
 -1 1 2 -22.76 0.00
 0 1 2 6.12 -0.01
 1 1 2 -18.91 -0.01
 2 1 2 -7.28 0.01
 3 1 2 0.53 0.03
 4 1 2 -1.17 -0.05
 5 1 2 0.88 0.01
 6 1 2 1.77 0.00
 7 1 2 -0.73 0.01
 8 1 2 -1.04 -0.02
 9 1 2 0.17 -0.02
 10 1 2 0.29 0.01
 -11 2 2 -0.24 0.00
 -10 2 2 -0.15 0.03
 -9 2 2 -0.26 -0.02
 -8 2 2 0.67 0.00
 -7 2 2 0.17 0.02
 -6 2 2 1.81 0.02
 -5 2 2 -4.00 -0.02
 -4 2 2 3.96 -0.02
 -3 2 2 -3.10 0.00
 -2 2 2 17.46 0.00
 -1 2 2 -7.98 0.01
 0 2 2 15.68 -0.02
 1 2 2 3.00 -0.02
 2 2 2 0.75 0.01
 3 2 2 6.04 0.03
 4 2 2 3.11 -0.05
 5 2 2 -1.69 0.01
 6 2 2 -0.74 0.00
 7 2 2 0.20 0.03
 8 2 2 -0.02 0.00
 9 2 2 0.38 -0.01
 10 2 2 0.29 0.00
 -11 3 2 -0.03 -0.02
 -10 3 2 -0.02 0.01
 -9 3 2 0.19 -0.02
 -8 3 2 0.51 -0.01
 -7 3 2 -1.47 0.00
 -6 3 2 0.85 0.00
 -5 3 2 -1.89 0.00
 -4 3 2 6.04 0.00
 -3 3 2 -7.94 0.01
 -2 3 2 5.34 -0.01
 -1 3 2 -15.22 0.01
 0 3 2 -2.38 0.00
 1 3 2 1.81 -0.01
 2 3 2 -2.38 -0.01
 3 3 2 -2.77 0.03
 4 3 2 -0.38 -0.01
 5 3 2 -2.08 0.01
 6 3 2 -0.36 -0.02
 7 3 2 1.21 0.00
 8 3 2 -0.12 -0.01
 9 3 2 -0.51 0.00
 10 3 2 0.08 0.00
 -10 4 2 -0.11 0.03
 -9 4 2 -0.21 0.00
 -8 4 2 -0.27 0.01
 -7 4 2 -0.93 0.01
 -6 4 2 2.34 0.00
 -5 4 2 -2.08 -0.01
 -4 4 2 2.98 0.00
 -3 4 2 -7.39 0.01
 -2 4 2 6.35 0.00
 -1 4 2 3.44 0.01
 0 4 2 3.04 0.00
 1 4 2 3.54 -0.01
 2 4 2 0.47 0.00
 3 4 2 -3.76 0.01
 4 4 2 1.45 -0.02
 5 4 2 2.23 0.00
 6 4 2 0.25 0.01
 7 4 2 -0.39 0.02
 8 4 2 0.06 -0.01
 9 4 2 0.05 0.00
 10 4 2 0.08 -0.01
 -10 5 2 -0.23 0.00
 -9 5 2 0.01 -0.02
 -8 5 2 0.73 0.00
 -7 5 2 0.32 0.00
 -6 5 2 1.67 0.01
 -5 5 2 -3.87 0.00
 -4 5 2 2.16 0.01
 -3 5 2 -0.39 0.00
 -2 5 2 1.77 -0.01
 -1 5 2 0.90 0.00
 0 5 2 -4.22 0.01
 1 5 2 -5.88 0.00
 2 5 2 1.95 -0.01
 3 5 2 0.25 0.00
 4 5 2 0.16 0.00
 5 5 2 0.67 0.00
 6 5 2 -0.04 -0.02
 7 5 2 -1.39 0.00
 8 5 2 0.14 -0.01
 9 5 2 0.36 0.00
 10 5 2 -0.11 0.00
 -10 6 2 -0.38 0.01
 -9 6 2 0.38 0.00
 -8 6 2 -0.10 0.01
 -7 6 2 -1.88 0.00
 -6 6 2 0.78 0.00
 -5 6 2 -1.07 -0.02
 -4 6 2 2.23 0.00
 -3 6 2 1.60 0.01
 -2 6 2 -3.82 0.00
 -1 6 2 -2.38 -0.01
 0 6 2 2.47 0.01
 1 6 2 -0.72 0.00
 2 6 2 4.40 0.01
 3 6 2 2.40 0.00
 4 6 2 -2.51 0.00
 5 6 2 -2.13 0.01
 6 6 2 1.83 0.01
 7 6 2 -0.09 0.01
 8 6 2 -0.27 -0.01
 9 6 2 0.22 0.00
 10 6 2 0.06 0.01
 -10 7 2 0.21 0.00
 -9 7 2 0.52 -0.01
 -8 7 2 -0.27 0.00
 -7 7 2 -0.80 0.00
 -6 7 2 2.22 0.00
 -5 7 2 0.22 -0.01
 -4 7 2 -1.95 0.00
 -3 7 2 -0.23 0.01
 -2 7 2 -0.37 0.00
 -1 7 2 0.40 -0.01
 0 7 2 5.99 0.00
 1 7 2 -0.83 0.00
 2 7 2 -3.74 0.00
 3 7 2 -0.73 0.00
 4 7 2 0.54 -0.01
 5 7 2 -1.18 0.00
 6 7 2 1.62 0.00
 7 7 2 0.20 0.00
 8 7 2 -0.41 0.00
 9 7 2 0.14 -0.01
 -10 8 2 -0.35 0.00
 -9 8 2 -0.14 -0.01
 -8 8 2 0.18 0.00
 -7 8 2 0.09 0.01
 -6 8 2 0.46 0.01
 -5 8 2 -0.46 0.00
 -4 8 2 -1.35 0.00
 -3 8 2 0.98 0.01
 -2 8 2 2.95 0.00
 -1 8 2 -1.66 -0.01
 0 8 2 -1.80 0.00
 1 8 2 -1.13 0.00
 2 8 2 -2.11 0.00
 3 8 2 0.56 0.01
 4 8 2 3.55 -0.01
 5 8 2 -1.24 0.00
 6 8 2 -0.92 0.00
 7 8 2 0.34 -0.01
 8 8 2 -0.17 0.00
 9 8 2 -0.47 -0.01
 -10 9 2 -0.26 0.00
 -9 9 2 0.54 0.00
 -8 9 2 0.29 0.00
 -7 9 2 -0.51 0.00
 -6 9 2 -1.21 -0.01
 -5 9 2 0.29 -0.01
 -4 9 2 1.18 -0.01
 -3 9 2 -0.21 -0.01
 -2 9 2 -0.28 0.00
 -1 9 2 -1.19 0.00
 0 9 2 -2.19 -0.01
 1 9 2 3.14 0.00
 2 9 2 2.79 0.00
 3 9 2 -1.62 0.00
 4 9 2 0.94 -0.01
 5 9 2 0.10 0.00
 6 9 2 -1.35 0.02
 7 9 2 0.50 0.00
 8 9 2 1.05 0.01
 9 9 2 0.15 0.00
 -9 10 2 0.47 0.00
 -8 10 2 -0.50 0.00
 -7 10 2 -0.19 0.00
 -6 10 2 0.11 0.00
 -5 10 2 1.23 0.01
 -4 10 2 0.69 0.02
 -3 10 2 -1.35 0.00
 -2 10 2 -1.97 0.00
 -1 10 2 2.84 0.00
 0 10 2 0.72 0.00
 1 10 2 0.08 0.00
 2 10 2 0.97 0.00
 3 10 2 -2.75 0.00
 4 10 2 -1.28 0.00
 5 10 2 2.03 -0.01
 6 10 2 -0.59 -0.01
 7 10 2 -0.93 -0.02
 8 10 2 0.27 0.00
 9 10 2 0.23 0.00
 -9 11 2 -0.26 0.00
 -8 11 2 -0.16 0.01
 -7 11 2 1.07 0.01
 -6 11 2 0.22 -0.01
 -5 11 2 -0.87 -0.02
 -4 11 2 -1.37 0.01
 -3 11 2 1.05 -0.01
 -2 11 2 -0.30 0.00
 -1 11 2 1.89 0.00
 0 11 2 0.30 -0.01
 1 11 2 -3.72 0.00
 2 11 2 -0.34 0.00
 3 11 2 1.53 -0.01
 4 11 2 -1.22 -0.01
 5 11 2 1.21 0.01
 6 11 2 0.65 0.02
 7 11 2 -0.54 0.00
 8 11 2 -0.08 0.01
 9 11 2 0.34 0.00
 -8 12 2 0.41 0.01
 -7 12 2 -0.33 0.00
 -6 12 2 -1.19 -0.01
 -5 12 2 -0.04 0.00
 -4 12 2 0.49 0.02
 -2 12 2 -1.11 -0.01
 -1 12 2 -2.77 -0.01
 0 12 2 0.87 0.00
 1 12 2 -0.08 0.01
 2 12 2 -0.10 0.00
 3 12 2 3.31 -0.01
 4 12 2 -0.88 0.00
 5 12 2 -0.94 0.00
 6 12 2 0.67 0.00
 7 12 2 -0.20 -0.02
 8 12 2 -0.48 -0.01
 -8 13 2 -0.48 0.01
 -7 13 2 -0.02 0.01
 -6 13 2 0.25 -0.01
 -5 13 2 0.80 -0.01
 -4 13 2 -0.23 0.00
 -3 13 2 -0.38 0.00
 -2 13 2 -0.10 0.00
 -1 13 2 -1.01 -0.01
 0 13 2 2.50 0.00
 1 13 2 2.58 0.00
 2 13 2 -2.49 0.01
 3 13 2 0.23 -0.01
 4 13 2 0.00 -0.01
 5 13 2 -1.35 0.01
 6 13 2 0.19 0.03
 7 13 2 0.51 0.00
 8 13 2 -0.18 0.00
 -8 14 2 -0.04 0.00
 -7 14 2 0.59 0.01
 -6 14 2 0.26 0.00
 -5 14 2 -0.19 0.00
 -4 14 2 -0.45 0.00
 -3 14 2 -1.05 0.01
 -2 14 2 1.17 0.01
 -1 14 2 0.33 -0.01
 0 14 2 -1.32 -0.01
 1 14 2 -0.20 0.01
 2 14 2 -2.44 0.01
 3 14 2 -0.66 -0.01
 4 14 2 1.49 -0.01
 5 14 2 0.29 -0.01
 6 14 2 -0.13 0.01
 7 14 2 0.30 0.00
 8 14 2 0.34 -0.01
 -7 15 2 0.53 0.01
 -6 15 2 -0.64 0.00
 -5 15 2 -1.11 -0.01
 -4 15 2 0.78 0.00
 -3 15 2 0.78 0.00
 -2 15 2 0.64 0.00
 -1 15 2 -0.03 0.00
 0 15 2 -1.37 -0.01
 1 15 2 1.22 0.00
 2 15 2 2.19 0.01
 3 15 2 0.46 0.01
 4 15 2 -0.06 -0.01
 5 15 2 0.34 0.00
 6 15 2 -0.65 0.02
 7 15 2 -0.73 0.01
 -7 16 2 -0.10 0.00
 -6 16 2 -0.29 0.01
 -5 16 2 0.52 0.00
 -4 16 2 0.94 0.00
 -3 16 2 -0.67 0.00
 -2 16 2 -1.50 0.00
 -1 16 2 0.01 0.01
 0 16 2 0.70 -0.01
 1 16 2 -0.71 0.00
 2 16 2 -0.51 0.00
 3 16 2 -0.24 0.00
 4 16 2 -1.26 0.00
 5 16 2 0.66 0.00
 6 16 2 0.53 0.00
 7 16 2 -0.48 0.00
 -6 17 2 0.41 0.01
 -5 17 2 0.18 0.00
 -4 17 2 -0.56 0.00
 -3 17 2 -0.43 0.00
 -2 17 2 0.69 0.00
 -1 17 2 0.30 0.01
 0 17 2 1.05 0.00
 1 17 2 -0.24 0.00
 2 17 2 -0.80 0.00
 3 17 2 1.29 0.01
 4 17 2 -0.79 0.00
 5 17 2 -0.49 -0.01
 6 17 2 0.45 0.00
 -6 18 2 -0.62 0.00
 -5 18 2 -0.59 0.00
 -4 18 2 0.06 0.00
 -3 18 2 0.15 0.00
 -2 18 2 0.85 0.00
 -1 18 2 -0.90 0.00
 0 18 2 -0.48 0.00
 1 18 2 0.51 0.00
 2 18 2 -1.23 -0.01
 3 18 2 1.03 0.00
 4 18 2 1.14 0.00
 5 18 2 -0.21 0.01
 -5 19 2 0.25 0.00
 -4 19 2 0.94 0.01
 -3 19 2 -0.24 0.00
 -2 19 2 -0.32 0.00
 -1 19 2 -0.23 0.00
 0 19 2 -0.56 0.01
 1 19 2 1.38 0.01
 2 19 2 -0.39 -0.01
 3 19 2 -1.14 0.00
 4 19 2 0.30 0.00
 -3 20 2 -0.37 0.00
 -2 20 2 -0.57 0.00
 -1 20 2 1.13 -0.01
 0 20 2 -0.13 0.00
 1 20 2 0.22 0.01
 2 20 2 0.72 0.00
 3 20 2 -0.82 -0.01
 -1 21 2 0.26 -0.01
 0 21 2 -0.29 0.00
 1 21 2 -1.14 0.00
 -9 0 3 0.27 0.01
 -7 0 3 -0.51 -0.02
 -5 0 3 2.14 0.01
 -3 0 3 8.04 -0.02
 -1 0 3 8.78 0.00
 1 0 3 10.33 0.01
 3 0 3 0.11 -0.01
 5 0 3 -2.82 0.02
 7 0 3 1.49 -0.01
 9 0 3 -0.91 0.02
 -10 1 3 -0.17 -0.03
 -9 1 3 0.12 0.02
 -8 1 3 -0.18 0.01
 -7 1 3 -0.53 -0.01
 -6 1 3 -0.12 -0.01
 -5 1 3 2.31 0.00
 -4 1 3 -4.90 0.02
 -3 1 3 -0.32 -0.01
 -2 1 3 -9.21 -0.01
 -1 1 3 2.13 0.00
 0 1 3 -10.25 0.01
 1 1 3 2.23 0.02
 2 1 3 -2.27 -0.02
 3 1 3 -4.90 -0.01
 4 1 3 1.64 0.01
 5 1 3 0.92 0.02
 6 1 3 -0.16 -0.01
 7 1 3 0.28 -0.02
 8 1 3 -0.04 0.00
 9 1 3 -0.46 0.00
 10 1 3 0.38 0.00
 -10 2 3 -0.18 0.00
 -9 2 3 -0.12 0.03
 -8 2 3 0.00 0.01
 -7 2 3 0.67 -0.01
 -6 2 3 -0.57 -0.01
 -5 2 3 1.98 0.00
 -4 2 3 -3.27 0.02
 -3 2 3 5.59 -0.01
 -2 2 3 -0.40 0.01
 -1 2 3 13.53 -0.01
 0 2 3 -2.64 -0.01
 1 2 3 -0.23 0.01
 2 2 3 3.32 0.00
 3 2 3 -1.96 -0.01
 4 2 3 1.92 -0.01
 5 2 3 1.99 0.01
 6 2 3 -1.47 0.01
 7 2 3 -0.69 -0.01
 8 2 3 0.95 0.01
 9 2 3 -0.11 0.01
 10 2 3 -0.44 0.00
 -10 3 3 0.11 -0.04
 -9 3 3 0.16 0.00
 -8 3 3 0.05 -0.01
 -7 3 3 0.59 0.00
 -6 3 3 -2.19 0.00
 -5 3 3 1.35 -0.01
 -4 3 3 -1.94 0.01
 -3 3 3 4.07 -0.01
 -2 3 3 -9.40 -0.01
 -1 3 3 -0.64 -0.01
 0 3 3 -5.62 0.00
 1 3 3 -4.60 0.02
 2 3 3 6.29 -0.01
 3 3 3 0.86 0.00
 4 3 3 -2.79 0.00
 5 3 3 0.12 0.01
 6 3 3 -0.16 0.00
 7 3 3 -0.49 -0.02
 8 3 3 0.52 0.00
 9 3 3 0.21 0.00
 10 3 3 -0.17 0.01
 -10 4 3 0.29 0.01
 -9 4 3 0.08 0.03
 -8 4 3 -1.06 0.00
 -7 4 3 0.13 0.00
 -6 4 3 -0.90 0.00
 -5 4 3 3.21 0.00
 -4 4 3 -1.67 0.00
 -3 4 3 3.07 0.00
 -2 4 3 -3.41 0.01
 -1 4 3 4.73 0.00
 0 4 3 8.09 -0.01
 1 4 3 -0.61 0.01
 2 4 3 0.26 0.00
 3 4 3 0.04 0.00
 4 4 3 -3.12 -0.01
 5 4 3 0.41 0.01
 6 4 3 1.60 0.01
 7 4 3 -0.20 0.00
 8 4 3 -0.52 0.00
 9 4 3 0.10 -0.01
 10 4 3 -0.11 0.00
 -10 5 3 0.32 -0.02
 -9 5 3 -0.05 0.00
 -8 5 3 -0.05 -0.01
 -7 5 3 1.90 -0.01
 -6 5 3 -0.79 0.00
 -5 5 3 0.60 0.01
 -4 5 3 -3.95 0.00
 -3 5 3 0.88 -0.01
 -2 5 3 0.32 0.00
 -1 5 3 -1.64 0.00
 0 5 3 -0.29 -0.01
 1 5 3 -4.02 0.00
 2 5 3 -5.06 -0.01
 3 5 3 2.65 0.00
 4 5 3 1.87 0.00
 5 5 3 -0.03 0.00
 6 5 3 0.00 -0.02
 7 5 3 0.25 -0.01
 8 5 3 -0.23 0.01
 9 5 3 0.24 0.00
 10 5 3 0.31 0.00
 -10 6 3 -0.14 0.00
 -9 6 3 -0.14 0.02
 -8 6 3 -0.15 0.00
 -7 6 3 0.25 -0.01
 -6 6 3 -2.41 0.00
 -5 6 3 1.57 0.01
 -4 6 3 0.95 0.00
 -3 6 3 1.64 -0.01
 -2 6 3 1.83 0.00
 -1 6 3 -2.47 0.01
 0 6 3 -2.15 0.00
 1 6 3 4.77 0.01
 2 6 3 0.69 -0.01
 3 6 3 1.87 0.00
 4 6 3 0.70 0.01
 5 6 3 -1.74 0.01
 6 6 3 -1.49 0.00
 7 6 3 0.85 0.00
 8 6 3 -0.12 0.00
 9 6 3 -0.68 0.01
 -10 7 3 0.16 -0.01
 -9 7 3 0.24 0.01
 -8 7 3 -0.01 0.01
 -7 7 3 0.42 -0.01
 -6 7 3 -1.21 -0.01
 -5 7 3 1.49 0.01
 -4 7 3 0.14 0.00
 -3 7 3 -2.81 -0.01
 -2 7 3 -1.29 0.00
 -1 7 3 1.64 0.00
 0 7 3 -1.18 0.00
 1 7 3 4.19 0.01
 2 7 3 -1.00 -0.01
 3 7 3 -3.45 -0.01
 4 7 3 -0.42 0.01
 5 7 3 1.65 0.00
 6 7 3 -0.51 -0.01
 7 7 3 0.46 0.00
 8 7 3 0.77 0.00
 9 7 3 0.12 0.01
 -10 8 3 0.09 0.00
 -9 8 3 -0.60 0.00
 -8 8 3 -0.42 0.00
 -7 8 3 1.12 -0.01
 -6 8 3 0.24 0.00
 -5 8 3 0.31 0.01
 -4 8 3 -0.44 0.01
 -3 8 3 -0.31 0.00
 -2 8 3 0.38 0.00
 -1 8 3 4.19 0.00
 0 8 3 -2.63 0.00
 1 8 3 -2.26 0.00
 2 8 3 -0.35 0.00
 3 8 3 -0.49 -0.01
 4 8 3 -0.34 0.01
 5 8 3 2.02 0.00
 6 8 3 -0.36 -0.01
 7 8 3 -0.98 -0.01
 8 8 3 -0.13 0.00
 9 8 3 -0.22 0.01
 -10 9 3 -0.13 0.00
 -9 9 3 -0.10 0.00
 -8 9 3 0.41 0.01
 -7 9 3 0.44 0.00
 -6 9 3 -1.18 -0.01
 -5 9 3 -1.27 -0.01
 -4 9 3 0.03 -0.01
 -3 9 3 2.17 0.00
 -2 9 3 -1.18 -0.01
 -1 9 3 -0.40 0.00
 0 9 3 -1.31 0.00
 1 9 3 -0.78 0.00
 2 9 3 2.90 0.00
 3 9 3 2.94 -0.01
 4 9 3 -1.66 0.00
 5 9 3 -0.32 0.01
 6 9 3 0.67 0.00
 7 9 3 -0.31 0.01
 8 9 3 -0.07 0.00
 9 9 3 0.41 0.00
 -9 10 3 0.22 0.00
 -8 10 3 -0.34 0.00
 -7 10 3 -0.66 -0.01
 -6 10 3 0.18 0.01
 -5 10 3 1.24 0.02
 -4 10 3 0.36 0.00
 -3 10 3 0.07 0.02
 -2 10 3 -1.52 0.00
 -1 10 3 -0.95 0.00
 0 10 3 2.30 0.01
 1 10 3 0.85 0.00
 2 10 3 -1.31 0.00
 3 10 3 -0.05 0.00
 4 10 3 -1.29 0.00
 5 10 3 -1.00 0.00
 6 10 3 1.04 -0.01
 7 10 3 0.22 0.00
 8 10 3 -0.52 0.00
 9 10 3 -0.01 0.00
 -9 11 3 -0.63 0.00
 -8 11 3 -0.35 -0.01
 -7 11 3 0.55 0.00
 -6 11 3 1.17 0.01
 -5 11 3 0.18 0.00
 -4 11 3 -1.46 -0.03
 -3 11 3 -1.14 0.00
 -2 11 3 2.02 0.00
 -1 11 3 0.81 0.00
 0 11 3 0.13 0.00
 1 11 3 -0.03 -0.01
 2 11 3 -1.97 0.00
 3 11 3 -0.20 0.00
 4 11 3 1.67 0.00
 5 11 3 -0.60 0.00
 6 11 3 -0.04 0.00
 7 11 3 0.89 0.01
 8 11 3 -0.21 0.00
 9 11 3 -0.77 -0.01
 -8 12 3 0.53 -0.01
 -7 12 3 -0.22 -0.01
 -6 12 3 -0.74 0.00
 -5 12 3 -0.89 0.02
 -4 12 3 0.21 0.00
 -3 12 3 -0.07 0.01
 -2 12 3 1.40 0.00
 -1 12 3 -0.67 0.00
 0 12 3 -3.19 0.00
 1 12 3 0.43 -0.01
 2 12 3 1.64 -0.01
 3 12 3 -0.59 0.00
 4 12 3 1.30 0.01
 5 12 3 0.19 -0.01
 6 12 3 -1.20 -0.02
 7 12 3 0.22 0.00
 8 12 3 0.41 0.01
 -8 13 3 -0.10 0.00
 -7 13 3 -0.67 -0.01
 -6 13 3 0.23 0.00
 -5 13 3 0.76 0.01
 -4 13 3 1.30 -0.01
 -3 13 3 -0.41 -0.02
 -2 13 3 -0.80 -0.01
 -1 13 3 0.93 0.01
 0 13 3 0.11 0.01
 1 13 3 0.92 -0.01
 2 13 3 2.17 -0.01
 3 13 3 -1.79 0.00
 4 13 3 -0.88 0.01
 5 13 3 0.92 0.01
 6 13 3 -0.72 -0.01
 7 13 3 -0.06 0.00
 8 13 3 0.36 0.01
 -8 14 3 0.00 0.00
 -7 14 3 -0.42 -0.01
 -6 14 3 0.86 0.00
 -5 14 3 0.34 0.01
 -4 14 3 -0.95 0.01
 -3 14 3 -1.10 0.00
 -2 14 3 -0.74 0.00
 -1 14 3 1.31 0.00
 0 14 3 0.46 0.01
 1 14 3 -2.39 0.00
 2 14 3 -0.13 -0.01
 3 14 3 -0.22 0.00
 4 14 3 -0.88 0.01
 5 14 3 0.82 0.00
 6 14 3 0.27 -0.02
 7 14 3 0.04 -0.01
 -7 15 3 -0.08 0.00
 -6 15 3 0.13 -0.01
 -5 15 3 -0.69 0.00
 -4 15 3 -0.51 0.01
 -3 15 3 1.47 0.00
 -2 15 3 0.98 0.00
 -1 15 3 -0.47 0.00
 0 15 3 0.22 0.01
 1 15 3 -0.44 0.00
 2 15 3 0.51 0.00
 3 15 3 1.56 -0.01
 4 15 3 0.11 0.00
 5 15 3 -0.37 0.01
 6 15 3 0.13 0.00
 7 15 3 0.13 -0.01
 -7 16 3 -0.82 0.00
 -6 16 3 -0.28 0.00
 -5 16 3 0.22 0.00
 -4 16 3 0.52 0.00
 -3 16 3 0.00 0.00
 -2 16 3 -0.68 -0.01
 -1 16 3 -1.13 -0.01
 0 16 3 0.23 0.01
 1 16 3 0.80 0.00
 2 16 3 -0.80 0.00
 3 16 3 -0.40 -0.01
 4 16 3 0.65 0.00
 5 16 3 -0.88 0.01
 6 16 3 -0.15 0.00
 -6 17 3 0.94 -0.01
 -5 17 3 0.40 0.00
 -4 17 3 -0.04 0.00
 -3 17 3 -0.58 0.01
 -2 17 3 0.02 0.00
 -1 17 3 0.72 0.00
 0 17 3 -0.14 0.00
 1 17 3 0.63 0.00
 2 17 3 0.14 0.01
 3 17 3 -1.38 0.00
 4 17 3 0.75 -0.01
 5 17 3 -0.24 0.00
 6 17 3 -0.43 0.00
 -5 18 3 -1.03 0.00
 -4 18 3 -0.54 0.00
 -3 18 3 0.35 0.00
 -2 18 3 0.29 0.00
 -1 18 3 0.68 0.00
 0 18 3 -0.68 0.00
 1 18 3 -0.77 -0.01
 2 18 3 1.14 0.00
 3 18 3 -0.46 0.00
 4 18 3 0.68 0.00
 5 18 3 0.69 0.01
 -4 19 3 0.48 0.00
 -3 19 3 0.58 0.00
 -2 19 3 -0.46 0.00
 -1 19 3 -0.64 0.01
 0 19 3 0.13 0.00
 1 19 3 -0.73 -0.01
 2 19 3 0.75 0.00
 3 19 3 -0.19 0.01
 4 19 3 -1.18 0.00
 -3 20 3 -0.65 -0.01
 -2 20 3 0.31 0.00
 -1 20 3 -0.09 0.01
 0 20 3 1.11 0.00
 1 20 3 0.04 -0.01
 2 20 3 -0.26 0.00
 3 20 3 1.08 0.01
 0 21 3 -0.61 0.01
 -10 0 4 0.35 0.01
 -8 0 4 -0.06 -0.01
 -6 0 4 -1.29 0.01
 -4 0 4 3.75 -0.01
 -2 0 4 4.96 0.01
 0 0 4 -1.51 -0.01
 2 0 4 2.86 0.01
 4 0 4 -0.69 0.00
 6 0 4 -0.61 0.00
 8 0 4 0.12 0.00
 10 0 4 -1.06 0.00
 -10 1 4 0.17 0.00
 -9 1 4 -0.17 -0.02
 -8 1 4 -0.21 -0.01
 -7 1 4 0.58 0.01
 -6 1 4 -0.73 0.00
 -5 1 4 -0.71 0.00
 -4 1 4 1.61 -0.02
 -3 1 4 -5.00 -0.01
 -2 1 4 -2.74 0.00
 -1 1 4 -3.01 0.01
 0 1 4 1.58 0.01
 1 1 4 0.48 -0.01
 2 1 4 1.32 0.00
 3 1 4 -0.21 0.01
 4 1 4 -2.85 0.01
 5 1 4 0.66 -0.02
 6 1 4 1.17 0.00
 7 1 4 -0.46 0.02
 8 1 4 -0.44 0.00
 9 1 4 0.99 -0.01
 10 1 4 0.17 0.00
 -10 2 4 0.16 0.04
 -9 2 4 0.00 0.00
 -8 2 4 -0.29 0.00
 -7 2 4 0.66 -0.01
 -6 2 4 0.85 0.00
 -5 2 4 -0.21 0.02
 -4 2 4 1.90 -0.01
 -3 2 4 -0.44 0.00
 -2 2 4 4.91 0.02
 -1 2 4 2.67 0.00
 0 2 4 4.13 0.00
 1 2 4 -1.80 -0.01
 2 2 4 -5.13 0.00
 3 2 4 1.58 0.00
 4 2 4 0.10 0.01
 5 2 4 0.20 -0.02
 6 2 4 1.15 -0.01
 7 2 4 -0.37 0.01
 8 2 4 -0.82 0.01
 9 2 4 0.23 0.00
 10 2 4 -0.27 -0.01
 -10 3 4 -0.12 -0.01
 -9 3 4 0.02 -0.02
 -8 3 4 0.40 0.00
 -7 3 4 0.00 0.00
 -6 3 4 -0.57 0.00
 -5 3 4 -2.69 0.01
 -4 3 4 0.00 -0.01
 -3 3 4 -1.35 -0.01
 -2 3 4 0.62 0.00
 -1 3 4 -6.96 -0.01
 0 3 4 -4.14 0.01
 1 3 4 1.86 0.00
 2 3 4 -1.31 0.00
 3 3 4 4.25 -0.01
 4 3 4 1.94 0.02
 5 3 4 -2.37 -0.01
 6 3 4 -0.30 -0.01
 7 3 4 0.58 0.00
 8 3 4 -0.09 0.01
 9 3 4 0.18 0.00
 10 3 4 0.49 0.00
 -10 4 4 -0.34 0.02
 -9 4 4 0.14 -0.01
 -8 4 4 0.17 0.01
 -7 4 4 -1.22 0.00
 -6 4 4 0.92 0.00
 -5 4 4 1.18 0.00
 -4 4 4 2.96 0.00
 -3 4 4 -0.53 -0.01
 -2 4 4 2.42 0.01
 -1 4 4 0.83 0.00
 0 4 4 1.61 0.01
 1 4 4 7.32 0.00
 2 4 4 -1.48 0.01
 3 4 4 -3.40 -0.01
 4 4 4 -0.04 0.01
 5 4 4 -1.27 0.00
 6 4 4 -0.08 0.01
 7 4 4 0.71 0.00
 8 4 4 -0.15 0.00
 9 4 4 -0.85 0.00
 -10 5 4 -0.06 0.00
 -9 5 4 -0.18 -0.01
 -8 5 4 0.48 0.01
 -7 5 4 -0.13 0.01
 -6 5 4 1.34 -0.01
 -5 5 4 -1.71 0.00
 -4 5 4 -1.51 0.00
 -3 5 4 -3.28 0.00
 -2 5 4 -0.01 0.01
 -1 5 4 1.39 -0.01
 0 5 4 -3.49 0.00
 1 5 4 -1.05 -0.01
 2 5 4 -1.21 0.01
 3 5 4 -2.90 0.00
 4 5 4 2.69 0.00
 5 5 4 2.23 -0.01
 6 5 4 -0.37 0.00
 7 5 4 -0.30 0.00
 8 5 4 0.87 0.00
 9 5 4 0.31 0.00
 -10 6 4 -0.08 0.01
 -9 6 4 -0.43 -0.02
 -8 6 4 0.30 -0.02
 -7 6 4 -0.47 0.01
 -6 6 4 0.77 0.00
 -5 6 4 -1.36 -0.01
 -4 6 4 1.63 0.00
 -3 6 4 2.38 0.00
 -2 6 4 1.18 0.01
 -1 6 4 1.14 0.00
 0 6 4 -1.88 0.00
 1 6 4 -1.96 0.00
 2 6 4 4.46 0.01
 3 6 4 0.44 0.00
 4 6 4 -0.69 -0.01
 5 6 4 -0.06 0.00
 6 6 4 -0.69 0.01
 7 6 4 -1.11 0.01
 8 6 4 -0.09 0.00
 9 6 4 -0.20 -0.01
 -10 7 4 0.08 0.00
 -9 7 4 0.17 0.01
 -8 7 4 0.40 0.00
 -7 7 4 -1.00 0.02
 -6 7 4 0.40 0.01
 -5 7 4 -0.85 -0.01
 -4 7 4 0.74 -0.01
 -3 7 4 -0.02 0.00
 -2 7 4 -2.85 0.00
 -1 7 4 -1.85 0.00
 0 7 4 3.23 -0.01
 1 7 4 -0.33 -0.01
 2 7 4 2.16 0.01
 3 7 4 -0.08 0.01
 4 7 4 -2.17 0.00
 5 7 4 -0.05 -0.01
 6 7 4 1.41 0.00
 7 7 4 -0.04 0.01
 8 7 4 0.15 0.00
 9 7 4 0.83 -0.01
 -10 8 4 0.48 0.00
 -9 8 4 -0.24 0.00
 -8 8 4 -0.42 -0.03
 -7 8 4 -0.38 0.00
 -6 8 4 2.07 0.01
 -5 8 4 0.21 0.00
 -4 8 4 -0.92 0.00
 -3 8 4 -0.74 0.00
 -2 8 4 1.21 0.00
 -1 8 4 -0.11 0.01
 0 8 4 3.04 0.00
 1 8 4 -2.61 -0.01
 2 8 4 -3.66 0.00
 3 8 4 0.20 0.01
 4 8 4 0.46 0.00
 5 8 4 -0.39 -0.01
 6 8 4 0.74 0.00
 7 8 4 0.08 0.00
 8 8 4 -0.70 0.00
 9 8 4 -0.26 0.00
 -9 9 4 -0.16 0.01
 -8 9 4 0.65 0.00
 -7 9 4 -0.06 0.01
 -6 9 4 -0.10 0.01
 -5 9 4 -1.39 0.00
 -4 9 4 -0.12 0.00
 -3 9 4 0.81 -0.01
 -2 9 4 2.34 0.00
 -1 9 4 -2.32 0.00
 0 9 4 -0.81 0.00
 1 9 4 1.13 0.00
 2 9 4 0.05 0.00
 3 9 4 2.20 0.00
 4 9 4 1.89 0.00
 5 9 4 -1.21 0.00
 6 9 4 -0.76 0.00
 7 9 4 0.49 0.00
 8 9 4 -0.06 0.00
 9 9 4 -0.21 0.00
 -9 10 4 0.36 0.00
 -8 10 4 0.29 0.00
 -7 10 4 -0.98 0.00
 -6 10 4 -0.40 0.00
 -5 10 4 0.21 0.00
 -4 10 4 1.22 0.02
 -3 10 4 -0.64 0.00
 -2 10 4 -0.62 0.00
 -1 10 4 -1.12 0.00
 0 10 4 -0.41 0.00
 1 10 4 2.39 0.00
 2 10 4 -0.59 0.00
 3 10 4 -1.86 0.00
 4 10 4 0.06 0.00
 5 10 4 0.14 0.00
 6 10 4 -0.64 0.01
 7 10 4 0.24 0.00
 8 10 4 0.60 0.00
 9 10 4 0.16 0.01
 -9 11 4 -0.18 -0.01
 -8 11 4 -0.20 0.00
 -7 11 4 0.16 0.01
 -6 11 4 1.06 0.00
 -5 11 4 0.58 -0.01
 -4 11 4 0.18 0.01
 -3 11 4 -0.72 -0.01
 -2 11 4 -0.67 0.01
 -1 11 4 1.84 0.00
 0 11 4 0.55 0.00
 1 11 4 -0.04 0.01
 2 11 4 -0.57 0.01
 3 11 4 -0.82 0.00
 4 11 4 -0.10 -0.01
 5 11 4 0.93 0.00
 6 11 4 -0.08 0.00
 7 11 4 -0.41 -0.01
 8 11 4 0.10 -0.01
 -8 12 4 0.31 0.00
 -7 12 4 0.40 0.01
 -6 12 4 -0.55 0.00
 -5 12 4 -1.52 -0.02
 -4 12 4 -0.80 0.02
 -3 12 4 1.12 0.01
 -2 12 4 -0.08 0.00
 -1 12 4 0.12 -0.01
 0 12 4 -0.54 0.00
 1 12 4 -1.37 0.00
 2 12 4 0.24 0.00
 3 12 4 1.52 0.00
 4 12 4 -0.22 -0.01
 5 12 4 0.16 0.00
 6 12 4 0.57 0.02
 7 12 4 -0.70 0.01
 8 12 4 -0.17 -0.01
 -8 13 4 -0.02 0.00
 -7 13 4 0.19 0.01
 -6 13 4 -0.48 0.01
 -5 13 4 0.20 -0.01
 -4 13 4 1.05 -0.01
 -3 13 4 1.34 0.00
 -2 13 4 -0.85 0.01
 -1 13 4 -1.38 0.00
 0 13 4 0.96 -0.01
 1 13 4 0.84 0.00
 2 13 4 -0.49 0.01
 3 13 4 0.62 0.01
 4 13 4 -0.40 -0.01
 5 13 4 -1.02 -0.01
 6 13 4 0.76 0.01
 7 13 4 -0.13 0.00
 8 13 4 -0.36 -0.01
 -8 14 4 -0.42 -0.01
 -7 14 4 0.25 0.00
 -6 14 4 0.04 0.01
 -5 14 4 0.47 -0.01
 -4 14 4 -0.15 -0.01
 -3 14 4 -1.00 0.01
 -2 14 4 -0.33 0.00
 -1 14 4 0.04 0.00
 0 14 4 0.72 -0.01
 1 14 4 0.75 -0.01
 2 14 4 -1.22 0.01
 3 14 4 -0.45 0.01
 4 14 4 0.65 0.00
 5 14 4 -0.83 -0.01
 6 14 4 0.37 0.01
 7 14 4 0.28 0.01
 -7 15 4 0.98 0.00
 -6 15 4 -0.04 0.00
 -5 15 4 -0.65 0.00
 -4 15 4 -0.38 -0.01
 -3 15 4 0.10 0.00
 -2 15 4 1.04 0.01
 -1 15 4 0.54 0.01
 0 15 4 -1.14 -0.01
 1 15 4 -0.10 -0.01
 2 15 4 0.29 0.00
 3 15 4 -0.49 0.00
 4 15 4 1.00 -0.01
 5 15 4 0.36 -0.02
 6 15 4 -0.19 0.01
 7 15 4 -0.42 0.01
 -7 16 4 0.14 0.00
 -6 16 4 -0.87 0.01
 -5 16 4 -0.21 0.01
 -4 16 4 0.58 0.00
 -3 16 4 0.46 -0.01
 -2 16 4 -0.55 0.00
 -1 16 4 -0.11 0.00
 0 16 4 -0.42 0.00
 1 16 4 -0.17 0.00
 2 16 4 1.27 0.00
 3 16 4 -0.40 0.01
 4 16 4 -0.69 0.02
 5 16 4 0.40 -0.01
 6 16 4 -0.13 -0.01
 -6 17 4 0.19 -0.01
 -5 17 4 1.01 0.00
 -4 17 4 0.00 0.00
 -3 17 4 -0.20 -0.01
 -2 17 4 -0.68 0.00
 -1 17 4 0.20 0.01
 0 17 4 0.93 0.00
 1 17 4 -0.62 0.00
 2 17 4 0.16 0.00
 3 17 4 0.30 -0.01
 4 17 4 -1.12 0.00
 5 17 4 0.54 -0.01
 -5 18 4 -0.09 0.00
 -4 18 4 -0.95 0.01
 -3 18 4 0.02 0.00
 -2 18 4 0.50 0.00
 -1 18 4 0.05 0.00
 0 18 4 0.48 0.00
 1 18 4 -0.50 0.01
 2 18 4 -0.69 0.00
 3 18 4 1.20 -0.01
 4 18 4 -0.24 0.02
 -4 19 4 0.26 0.00
 -3 19 4 0.38 0.00
 -2 19 4 0.00 0.00
 -1 19 4 -0.62 -0.01
 0 19 4 -0.37 0.00
 1 19 4 0.54 0.01
 2 19 4 -0.61 0.00
 3 19 4 0.15 -0.01
 -3 20 4 0.00 0.01
 -2 20 4 -0.51 0.01
 -1 20 4 0.53 0.00
 0 20 4 0.08 -0.01
 1 20 4 0.65 0.00
 2 20 4 0.07 0.01
 -9 0 5 0.47 0.00
 -7 0 5 -0.46 0.00
 -5 0 5 -0.19 0.00
 -3 0 5 4.11 0.01
 -1 0 5 -1.68 -0.01
 1 0 5 -4.34 0.01
 3 0 5 2.61 -0.02
 5 0 5 -0.92 0.01
 7 0 5 -0.04 -0.01
 9 0 5 -0.92 0.01
 -10 1 5 -0.32 -0.02
 -9 1 5 -0.05 -0.01
 -8 1 5 0.05 0.01
 -7 1 5 -0.82 0.01
 -6 1 5 0.29 -0.01
 -5 1 5 -0.68 -0.02
 -4 1 5 -1.76 0.00
 -3 1 5 0.28 0.01
 -2 1 5 -2.38 -0.01
 -1 1 5 -3.45 -0.01
 0 1 5 3.00 0.00
 1 1 5 3.18 0.00
 2 1 5 1.13 0.01
 3 1 5 0.42 0.00
 4 1 5 -0.23 -0.01
 5 1 5 -1.49 0.01
 6 1 5 0.10 0.01
 7 1 5 0.75 -0.01
 8 1 5 0.39 -0.01
 9 1 5 -0.31 0.00
 -10 2 5 -0.06 0.01
 -9 2 5 0.17 0.01
 -8 2 5 0.24 0.00
 -7 2 5 -0.36 0.01
 -6 2 5 1.85 0.00
 -5 2 5 1.72 0.00
 -4 2 5 -0.06 0.00
 -3 2 5 0.78 0.01
 -2 2 5 2.17 0.00
 -1 2 5 2.18 0.01
 0 2 5 1.47 0.00
 1 2 5 -0.74 0.00
 2 2 5 -3.11 0.01
 3 2 5 -3.71 0.00
 4 2 5 1.17 -0.02
 5 2 5 0.98 0.00
 6 2 5 -0.25 0.01
 7 2 5 0.13 0.00
 8 2 5 0.00 -0.01
 9 2 5 -0.80 0.00
 -10 3 5 0.14 -0.01
 -9 3 5 -0.36 0.01
 -8 3 5 0.09 0.00
 -7 3 5 -0.17 0.01
 -6 3 5 -0.80 0.00
 -5 3 5 -2.04 -0.01
 -4 3 5 -1.91 0.00
 -3 3 5 -0.44 0.01
 -2 3 5 -0.52 -0.02
 -1 3 5 -1.06 0.00
 0 3 5 -3.72 -0.01
 1 3 5 -2.08 0.00
 2 3 5 3.76 0.00
 3 3 5 1.46 0.01
 4 3 5 1.78 -0.01
 5 3 5 0.98 0.00
 6 3 5 -1.47 0.01
 7 3 5 -0.26 0.00
 8 3 5 0.79 -0.01
 9 3 5 0.42 0.00
 -10 4 5 0.13 0.00
 -9 4 5 0.00 0.00
 -8 4 5 -0.05 -0.01
 -7 4 5 0.03 0.00
 -6 4 5 0.07 0.01
 -5 4 5 1.63 0.00
 -4 4 5 2.33 -0.01
 -3 4 5 1.66 0.00
 -2 4 5 -0.99 -0.01
 -1 4 5 1.45 0.02
 0 4 5 2.17 0.00
 1 4 5 -0.22 0.00
 2 4 5 2.62 0.00
 3 4 5 -1.10 0.00
 4 4 5 -3.79 0.00
 5 4 5 -0.08 0.00
 6 4 5 0.16 0.00
 7 4 5 -0.15 0.00
 8 4 5 -0.36 0.00
 9 4 5 -0.14 0.00
 -10 5 5 0.28 0.00
 -9 5 5 0.12 0.03
 -8 5 5 -0.44 0.02
 -7 5 5 0.28 -0.01
 -6 5 5 -0.26 0.00
 -5 5 5 0.03 0.00
 -4 5 5 -1.73 0.01
 -3 5 5 -1.47 0.01
 -2 5 5 -2.25 -0.02
 -1 5 5 0.33 0.00
 0 5 5 2.49 0.00
 1 5 5 -2.32 0.00
 2 5 5 -1.91 0.00
 3 5 5 1.64 0.00
 4 5 5 -0.67 0.00
 5 5 5 1.23 0.00
 6 5 5 1.21 -0.01
 7 5 5 0.15 0.00
 8 5 5 -0.17 0.00
 9 5 5 0.78 0.00
 -10 6 5 0.05 -0.01
 -9 6 5 0.17 -0.02
 -8 6 5 -0.36 -0.01
 -7 6 5 0.64 -0.02
 -6 6 5 -0.29 0.00
 -5 6 5 0.42 0.00
 -4 6 5 -0.68 0.00
 -3 6 5 1.70 0.00
 -2 6 5 2.03 -0.02
 -1 6 5 -0.22 0.00
 0 6 5 -0.36 0.01
 1 6 5 -1.26 0.00
 2 6 5 -2.50 0.00
 3 6 5 3.19 -0.01
 4 6 5 0.40 0.00
 5 6 5 -1.44 0.01
 6 6 5 -0.44 0.00
 7 6 5 0.18 -0.01
 8 6 5 -0.84 0.00
 9 6 5 -0.59 0.01
 -10 7 5 -0.60 0.00
 -9 7 5 0.51 0.01
 -8 7 5 0.15 0.05
 -7 7 5 -0.04 0.00
 -6 7 5 -1.57 0.00
 -5 7 5 0.82 0.00
 -4 7 5 0.61 0.01
 -3 7 5 0.17 0.01
 -2 7 5 -0.82 0.00
 -1 7 5 -1.84 -0.01
 0 7 5 -0.40 0.01
 1 7 5 4.21 0.01
 2 7 5 0.08 0.00
 3 7 5 0.49 -0.01
 4 7 5 0.30 0.00
 5 7 5 -0.97 0.01
 6 7 5 -0.36 0.00
 7 7 5 0.99 -0.01
 8 7 5 0.37 0.00
 9 7 5 -0.04 0.00
 -9 8 5 0.33 -0.02
 -8 8 5 -0.57 0.00
 -7 8 5 0.26 -0.02
 -6 8 5 0.01 -0.01
 -5 8 5 1.26 -0.01
 -4 8 5 -0.57 0.00
 -3 8 5 -1.79 0.00
 -2 8 5 -0.22 0.00
 -1 8 5 2.15 -0.01
 0 8 5 -0.83 0.00
 1 8 5 0.16 0.01
 2 8 5 -1.76 0.00
 3 8 5 -2.79 -0.01
 4 8 5 0.56 -0.01
 5 8 5 0.98 0.00
 6 8 5 -0.45 0.00
 7 8 5 0.11 0.00
 8 8 5 0.33 0.00
 -9 9 5 -0.05 -0.01
 -8 9 5 -0.01 0.02
 -7 9 5 0.90 0.01
 -6 9 5 -0.53 0.01
 -5 9 5 -0.22 0.00
 -4 9 5 0.13 0.00
 -3 9 5 0.56 0.00
 -2 9 5 0.43 0.01
 -1 9 5 1.46 -0.01
 0 9 5 -1.43 0.00
 1 9 5 -1.30 0.01
 2 9 5 2.74 0.00
 3 9 5 0.31 0.00
 4 9 5 0.31 -0.01
 5 9 5 0.82 0.00
 6 9 5 -0.40 0.00
 7 9 5 -0.68 0.00
 8 9 5 0.02 0.00
 -9 10 5 0.09 0.00
 -8 10 5 -0.10 0.00
 -7 10 5 0.07 -0.01
 -6 10 5 -1.04 0.00
 -5 10 5 -0.37 0.00
 -4 10 5 0.21 -0.01
 -3 10 5 0.28 0.00
 -2 10 5 -0.65 0.00
 -1 10 5 -0.51 0.00
 0 10 5 0.43 -0.01
 1 10 5 -1.51 0.00
 2 10 5 1.99 0.00
 3 10 5 -0.18 0.00
 4 10 5 -1.42 0.00
 5 10 5 0.02 0.01
 6 10 5 0.62 0.00
 7 10 5 -0.27 0.01
 8 10 5 0.07 0.00
 -9 11 5 0.09 0.00
 -8 11 5 -0.36 -0.01
 -7 11 5 0.10 -0.01
 -6 11 5 0.49 0.00
 -5 11 5 1.34 0.01
 -4 11 5 0.45 -0.01
 -3 11 5 -0.83 0.00
 -2 11 5 -0.20 0.00
 -1 11 5 -0.64 0.01
 0 11 5 1.96 0.00
 1 11 5 -0.91 0.01
 2 11 5 -0.10 0.00
 3 11 5 -0.11 0.00
 4 11 5 -0.51 0.00
 5 11 5 -0.48 0.00
 6 11 5 0.62 -0.02
 7 11 5 0.19 -0.01
 8 11 5 -0.41 0.01
 -8 12 5 -0.02 0.00
 -7 12 5 0.10 -0.01
 -6 12 5 -0.06 -0.01
 -5 12 5 -0.42 0.01
 -4 12 5 -0.99 0.00
 -3 12 5 -0.76 0.00
 -2 12 5 2.03 -0.01
 -1 12 5 0.01 0.01
 0 12 5 0.20 0.01
 1 12 5 -0.68 0.00
 2 12 5 -0.14 -0.01
 3 12 5 0.46 0.00
 4 12 5 0.98 0.01
 5 12 5 -0.22 0.01
 6 12 5 -0.19 0.00
 7 12 5 0.36 0.00
 8 12 5 0.04 0.00
 -8 13 5 0.27 0.00
 -7 13 5 -0.24 -0.01
 -6 13 5 -0.19 -0.01
 -5 13 5 0.01 0.01
 -4 13 5 0.36 0.01
 -3 13 5 -0.15 0.00
 -2 13 5 0.55 0.00
 -1 13 5 -0.98 0.00
 0 13 5 -1.01 0.00
 1 13 5 0.13 0.01
 2 13 5 0.59 -0.01
 3 13 5 -0.49 -0.01
 4 13 5 0.15 0.00
 5 13 5 0.12 0.01
 6 13 5 -0.68 -0.01
 7 13 5 0.17 -0.02
 -7 14 5 -0.80 0.00
 -6 14 5 0.21 -0.01
 -5 14 5 0.83 0.00
 -4 14 5 0.53 0.01
 -3 14 5 -0.37 0.00
 -2 14 5 -0.39 -0.01
 -1 14 5 0.37 -0.01
 0 14 5 0.64 0.01
 1 14 5 0.30 0.01
 2 14 5 0.52 -0.01
 3 14 5 -0.44 -0.01
 4 14 5 -0.66 0.00
 5 14 5 0.50 0.01
 6 14 5 -0.33 0.00
 -7 15 5 -0.06 0.00
 -6 15 5 0.64 -0.01
 -5 15 5 -0.10 -0.01
 -4 15 5 -1.06 0.01
 -3 15 5 -0.40 0.00
 -2 15 5 0.23 0.00
 -1 15 5 0.41 0.00
 0 15 5 0.26 0.00
 1 15 5 -0.98 0.01
 2 15 5 -0.49 0.00
 3 15 5 0.80 -0.01
 4 15 5 -0.18 -0.02
 5 15 5 0.45 0.01
 6 15 5 0.17 0.01
 -6 16 5 -0.35 0.00
 -5 16 5 -0.36 0.00
 -4 16 5 0.16 0.00
 -3 16 5 0.63 0.01
 -2 16 5 0.39 0.00
 -1 16 5 -0.83 -0.01
 0 16 5 -0.08 0.00
 1 16 5 0.34 0.00
 2 16 5 -0.58 0.00
 3 16 5 0.70 0.01
 4 16 5 -0.23 0.00
 5 16 5 -0.72 0.02
 -5 17 5 0.36 0.00
 -4 17 5 0.64 -0.01
 -3 17 5 -0.39 0.00
 -2 17 5 0.01 0.00
 -1 17 5 -0.19 0.00
 0 17 5 0.06 0.00
 1 17 5 1.14 0.00
 2 17 5 -0.67 0.00
 3 17 5 -0.07 0.00
 4 17 5 0.82 -0.03
 5 17 5 -0.43 0.00
 -5 18 5 -0.24 0.00
 -4 18 5 -0.03 0.00
 -3 18 5 -0.66 0.00
 -2 18 5 0.12 0.00
 -1 18 5 0.45 0.00
 0 18 5 -0.68 0.00
 1 18 5 0.28 -0.01
 2 18 5 -0.15 -0.01
 3 18 5 -0.66 0.01
 4 18 5 0.70 0.00
 -3 19 5 0.18 -0.01
 -2 19 5 0.14 -0.01
 -1 19 5 0.24 0.00
 0 19 5 -0.44 0.00
 1 19 5 -0.07 0.00
 2 19 5 0.62 -0.01
 3 19 5 -0.53 0.01
 -1 20 5 -0.14 0.00
 0 20 5 0.33 0.01
 1 20 5 -0.20 0.00
 -10 0 6 0.30 0.00
 -8 0 6 0.45 -0.01
 -6 0 6 0.16 0.01
 -4 0 6 0.79 -0.01
 -2 0 6 1.39 0.01
 0 0 6 -5.30 0.00
 2 0 6 -2.12 -0.01
 4 0 6 1.58 0.01
 6 0 6 -0.69 -0.01
 8 0 6 -0.13 0.01
 -10 1 6 0.05 0.00
 -9 1 6 -0.57 0.01
 -8 1 6 -0.21 0.00
 -7 1 6 -0.08 -0.01
 -6 1 6 -1.18 0.00
 -5 1 6 -0.68 0.01
 -4 1 6 0.15 0.00
 -3 1 6 -1.10 -0.01
 -2 1 6 -1.10 0.00
 -1 1 6 1.40 0.00
 0 1 6 -1.43 -0.01
 1 1 6 3.54 0.00
 2 1 6 3.50 -0.01
 3 1 6 0.47 0.01
 4 1 6 -0.76 0.01
 5 1 6 -0.22 0.00
 6 1 6 -0.52 -0.01
 7 1 6 0.19 0.00
 8 1 6 0.36 0.01
 9 1 6 0.46 0.00
 -10 2 6 0.07 0.00
 -9 2 6 0.24 0.00
 -8 2 6 0.09 0.00
 -7 2 6 0.66 -0.01
 -6 2 6 0.58 0.00
 -5 2 6 1.65 0.01
 -4 2 6 1.20 0.00
 -3 2 6 -0.22 -0.01
 -2 2 6 -0.99 0.01
 -1 2 6 2.41 0.01
 0 2 6 0.40 0.01
 1 2 6 -1.66 0.00
 2 2 6 -1.89 -0.01
 3 2 6 -2.14 -0.01
 4 2 6 -2.08 0.01
 5 2 6 1.27 0.00
 6 2 6 1.02 -0.01
 7 2 6 -0.46 -0.01
 8 2 6 -0.47 0.01
 9 2 6 0.10 0.00
 -10 3 6 0.04 0.00
 -9 3 6 0.07 0.00
 -8 3 6 -0.37 0.01
 -7 3 6 0.02 0.00
 -6 3 6 -0.87 0.00
 -5 3 6 -1.48 0.00
 -4 3 6 -1.43 0.00
 -3 3 6 0.20 -0.01
 -2 3 6 0.07 0.00
 -1 3 6 -0.36 -0.02
 0 3 6 0.00 0.00
 1 3 6 -1.41 0.00
 2 3 6 0.33 0.00
 3 3 6 3.49 0.00
 4 3 6 1.11 0.00
 5 3 6 0.10 0.01
 6 3 6 0.11 0.00
 7 3 6 -0.45 0.00
 8 3 6 0.02 0.00
 9 3 6 0.49 0.00
 -10 4 6 -0.32 0.00
 -9 4 6 0.27 -0.02
 -8 4 6 0.09 0.00
 -7 4 6 0.06 0.01
 -6 4 6 0.29 0.00
 -5 4 6 0.63 0.00
 -4 4 6 1.02 0.00
 -3 4 6 1.00 -0.01
 -2 4 6 0.78 0.02
 -1 4 6 -2.02 0.00
 0 4 6 0.44 0.00
 1 4 6 1.16 0.00
 2 4 6 -0.61 0.00
 3 4 6 -0.24 0.00
 4 4 6 -0.77 -0.01
 5 4 6 -1.81 0.00
 6 4 6 0.18 0.00
 7 4 6 0.31 0.00
 8 4 6 -0.32 0.01
 9 4 6 -0.53 0.00
 -10 5 6 -0.19 0.02
 -9 5 6 0.10 0.01
 -8 5 6 0.05 0.00
 -7 5 6 -0.34 0.01
 -6 5 6 0.15 0.00
 -5 5 6 -0.07 0.00
 -4 5 6 0.09 0.00
 -3 5 6 -1.63 0.00
 -2 5 6 0.31 0.01
 -1 5 6 -0.78 -0.01
 0 5 6 0.86 -0.01
 1 5 6 2.12 0.00
 2 5 6 -0.11 0.00
 3 5 6 -2.10 0.01
 4 5 6 1.48 -0.01
 5 5 6 0.37 0.00
 6 5 6 0.24 0.00
 7 5 6 0.31 0.00
 8 5 6 0.40 0.00
 9 5 6 0.08 -0.01
 -9 6 6 -0.26 -0.02
 -8 6 6 0.07 -0.03
 -7 6 6 0.17 0.01
 -6 6 6 0.59 0.01
 -5 6 6 -0.99 0.00
 -4 6 6 -0.13 -0.01
 -3 6 6 -0.77 -0.01
 -2 6 6 1.99 0.01
 -1 6 6 0.76 0.01
 0 6 6 -1.79 -0.01
 1 6 6 -1.98 0.00
 2 6 6 0.74 0.00
 3 6 6 -1.90 0.01
 4 6 6 1.39 0.00
 5 6 6 0.58 -0.01
 6 6 6 -0.67 0.00
 7 6 6 -0.62 0.01
 8 6 6 0.06 0.01
 9 6 6 -0.30 0.00
 -9 7 6 -0.44 0.03
 -8 7 6 0.38 -0.01
 -7 7 6 -0.12 0.01
 -6 7 6 -0.04 0.00
 -5 7 6 -0.67 0.01
 -4 7 6 1.51 -0.01
 -3 7 6 0.55 -0.01
 -2 7 6 -0.29 0.01
 -1 7 6 -0.71 0.01
 0 7 6 0.15 -0.01
 1 7 6 -0.04 0.00
 2 7 6 3.79 -0.01
 3 7 6 -0.37 0.01
 4 7 6 -0.72 0.01
 5 7 6 0.22 0.00
 6 7 6 0.20 -0.01
 7 7 6 -0.43 0.00
 8 7 6 0.28 0.00
 -9 8 6 -0.24 0.01
 -8 8 6 -0.11 -0.03
 -7 8 6 -0.29 0.00
 -6 8 6 0.67 0.00
 -5 8 6 -0.35 0.01
 -4 8 6 -0.43 0.00
 -3 8 6 -0.47 -0.01
 -2 8 6 -0.65 -0.01
 -1 8 6 -0.29 0.01
 0 8 6 1.49 0.00
 1 8 6 -1.50 0.00
 2 8 6 -0.42 0.00
 3 8 6 -0.50 0.00
 4 8 6 -1.22 0.00
 5 8 6 0.00 0.00
 6 8 6 0.84 -0.01
 7 8 6 -0.26 0.00
 8 8 6 -0.19 0.01
 -9 9 6 -0.05 0.01
 -8 9 6 0.14 -0.01
 -7 9 6 -0.04 0.00
 -6 9 6 0.69 0.00
 -5 9 6 0.08 0.01
 -4 9 6 -0.33 0.00
 -3 9 6 0.63 -0.01
 -2 9 6 0.46 -0.01
 -1 9 6 -0.37 0.01
 0 9 6 0.95 0.00
 1 9 6 0.02 0.00
 2 9 6 -1.36 0.00
 3 9 6 1.51 0.00
 4 9 6 0.64 0.00
 5 9 6 -0.37 0.00
 6 9 6 0.41 -0.01
 7 9 6 0.11 0.00
 8 9 6 -0.47 0.01
 -9 10 6 -0.16 0.00
 -8 10 6 0.05 0.00
 -7 10 6 -0.24 0.01
 -6 10 6 -0.13 -0.01
 -5 10 6 -0.70 0.00
 -4 10 6 -0.76 0.01
 -3 10 6 0.80 0.00
 -2 10 6 0.58 -0.01
 -1 10 6 -0.45 0.01
 0 10 6 -1.18 0.00
 1 10 6 1.46 0.00
 2 10 6 -1.16 0.00
 3 10 6 0.64 0.00
 4 10 6 0.57 0.00
 5 10 6 -0.80 0.01
 6 10 6 -0.50 0.01
 7 10 6 0.42 0.00
 8 10 6 0.15 0.00
 -8 11 6 0.07 0.00
 -7 11 6 -0.23 0.00
 -6 11 6 0.25 0.00
 -5 11 6 0.54 0.00
 -4 11 6 0.48 0.00
 -3 11 6 0.23 0.00
 -2 11 6 -1.52 0.00
 -1 11 6 0.14 0.00
 0 11 6 -1.07 -0.01
 1 11 6 2.08 0.00
 2 11 6 -0.68 0.01
 3 11 6 -0.90 0.00
 4 11 6 0.21 0.00
 5 11 6 0.33 -0.01
 6 11 6 -0.48 0.00
 7 11 6 0.19 0.00
 -8 12 6 -0.15 0.00
 -7 12 6 0.09 0.01
 -6 12 6 0.30 0.01
 -5 12 6 -0.18 -0.01
 -4 12 6 -0.33 -0.01
 -3 12 6 0.53 0.00
 -2 12 6 -0.52 0.00
 -1 12 6 2.13 0.01
 0 12 6 -0.45 0.00
 1 12 6 0.29 -0.01
 2 12 6 -0.26 0.00
 3 12 6 -0.26 0.00
 4 12 6 0.01 0.00
 5 12 6 0.80 -0.01
 6 12 6 -0.24 0.02
 7 12 6 -0.24 0.01
 -7 13 6 0.39 0.00
 -6 13 6 -0.10 0.01
 -5 13 6 -0.86 0.00
 -4 13 6 -0.64 -0.01
 -3 13 6 0.66 0.00
 -2 13 6 -0.87 0.01
 -1 13 6 0.14 0.00
 0 13 6 -0.98 -0.01
 1 13 6 -0.45 -0.01
 2 13 6 0.27 0.01
 3 13 6 0.67 0.01
 4 13 6 -0.56 0.00
 5 13 6 0.15 -0.01
 6 13 6 0.24 0.00
 -7 14 6 -0.04 0.00
 -6 14 6 -0.30 0.01
 -5 14 6 0.36 0.01
 -4 14 6 1.04 -0.01
 -3 14 6 0.97 -0.01
 -2 14 6 -0.53 0.00
 -1 14 6 -0.27 0.01
 0 14 6 0.41 0.01
 1 14 6 0.73 -0.01
 2 14 6 -0.35 0.00
 3 14 6 0.11 0.01
 4 14 6 -0.37 0.01
 5 14 6 -0.25 -0.01
 6 14 6 0.31 0.00
 -6 15 6 0.29 0.00
 -5 15 6 -0.05 0.01
 -4 15 6 -0.57 -0.01
 -3 15 6 -0.87 -0.01
 -2 15 6 -0.01 0.00
 -1 15 6 0.51 0.01
 0 15 6 -0.01 0.00
 1 15 6 0.33 -0.01
 2 15 6 -0.40 0.00
 3 15 6 0.10 0.00
 4 15 6 0.54 0.00
 5 15 6 -0.20 -0.01
 -6 16 6 -0.09 0.00
 -5 16 6 -0.48 0.01
 -4 16 6 0.07 0.00
 -3 16 6 0.24 0.00
 -2 16 6 0.17 0.00
 -1 16 6 0.00 0.00
 0 16 6 -0.97 0.00
 1 16 6 -0.07 0.00
 2 16 6 0.22 -0.01
 3 16 6 -0.72 0.00
 4 16 6 -0.04 0.03
 -5 17 6 -0.01 0.00
 -4 17 6 0.34 0.00
 -3 17 6 0.48 -0.01
 -2 17 6 -0.14 0.00
 -1 17 6 0.38 0.00
 0 17 6 0.25 0.00
 1 17 6 -0.01 0.01
 2 17 6 0.90 0.00
 3 17 6 -0.08 -0.02
 4 17 6 -0.19 0.00
 -4 18 6 -0.25 0.00
 -3 18 6 -0.19 0.00
 -2 18 6 -0.54 0.01
 -1 18 6 -0.32 0.00
 0 18 6 0.28 0.00
 1 18 6 -0.77 0.00
 2 18 6 0.07 0.00
 3 18 6 0.24 -0.01
 -2 19 6 0.51 0.00
 -1 19 6 -0.10 0.00
 0 19 6 0.46 -0.01
 1 19 6 -0.07 0.00
 -9 0 7 0.69 -0.02
 -7 0 7 0.48 0.00
 -5 0 7 0.33 -0.01
 -3 0 7 0.07 0.00
 -1 0 7 -1.39 -0.01
 1 0 7 -4.54 0.00
 3 0 7 -0.55 0.00
 5 0 7 1.44 0.01
 7 0 7 -0.48 0.01
 -10 1 7 -0.13 0.00
 -9 1 7 -0.03 -0.01
 -8 1 7 -0.51 0.01
 -7 1 7 -0.23 0.01
 -6 1 7 -0.54 0.00
 -5 1 7 -0.59 -0.01
 -4 1 7 -0.16 0.00
 -3 1 7 0.39 0.01
 -2 1 7 0.70 0.00
 -1 1 7 -1.38 -0.01
 0 1 7 2.60 -0.01
 1 1 7 0.30 -0.01
 2 1 7 2.45 0.01
 3 1 7 2.02 0.01
 4 1 7 -0.44 -0.01
 5 1 7 -1.16 0.00
 6 1 7 -0.27 0.00
 7 1 7 0.20 0.01
 8 1 7 -0.06 -0.01
 -10 2 7 -0.14 0.00
 -9 2 7 0.17 -0.01
 -8 2 7 0.23 0.01
 -7 2 7 0.25 0.00
 -6 2 7 0.51 0.00
 -5 2 7 0.81 0.00
 -4 2 7 0.41 0.00
 -3 2 7 -0.70 0.00
 -2 2 7 0.19 0.01
 -1 2 7 -1.71 0.01
 0 2 7 0.93 0.00
 1 2 7 -0.18 0.00
 2 2 7 -2.06 0.00
 3 2 7 -1.80 0.00
 4 2 7 -0.25 0.00
 5 2 7 -0.26 -0.01
 6 2 7 0.75 0.00
 7 2 7 0.50 0.01
 8 2 7 -0.39 0.00
 -10 3 7 0.18 0.00
 -9 3 7 -0.14 0.00
 -8 3 7 0.10 -0.01
 -7 3 7 -0.07 -0.01
 -6 3 7 -0.48 0.00
 -5 3 7 -0.41 -0.01
 -4 3 7 -0.31 0.00
 -3 3 7 -0.46 -0.01
 -2 3 7 1.36 -0.01
 -1 3 7 0.69 0.00
 0 3 7 -0.22 0.00
 1 3 7 0.70 0.00
 2 3 7 -0.01 0.00
 3 3 7 0.19 0.01
 4 3 7 2.10 0.00
 5 3 7 0.04 -0.01
 6 3 7 -0.62 0.00
 7 3 7 0.08 0.00
 8 3 7 0.18 0.00
 -9 4 7 -0.38 0.00
 -8 4 7 0.14 0.01
 -7 4 7 0.16 0.00
 -6 4 7 -0.29 0.00
 -5 4 7 0.15 0.00
 -4 4 7 0.16 0.01
 -3 4 7 0.06 0.00
 -2 4 7 -0.47 0.00
 -1 4 7 0.26 0.01
 0 4 7 -2.05 0.00
 1 4 7 -0.34 0.00
 2 4 7 0.65 0.00
 3 4 7 -0.46 0.00
 4 4 7 -0.10 0.01
 5 4 7 -0.30 0.00
 6 4 7 -0.53 0.00
 7 4 7 0.00 0.00
 8 4 7 0.29 0.00
 -9 5 7 -0.12 0.01
 -8 5 7 0.13 0.01
 -7 5 7 0.05 -0.01
 -6 5 7 -0.21 -0.01
 -5 5 7 0.79 -0.01
 -4 5 7 0.24 0.01
 -3 5 7 0.64 0.00
 -2 5 7 -1.66 -0.01
 -1 5 7 1.25 0.00
 0 5 7 0.82 0.00
 1 5 7 0.96 0.01
 2 5 7 0.66 0.00
 3 5 7 0.14 -0.01
 4 5 7 -1.07 0.00
 5 5 7 0.38 0.00
 6 5 7 0.37 0.00
 7 5 7 -0.12 0.00
 8 5 7 0.31 -0.01
 -9 6 7 0.15 -0.02
 -8 6 7 -0.11 0.02
 -7 6 7 0.04 0.01
 -6 6 7 -0.18 0.00
 -5 6 7 0.11 0.00
 -4 6 7 -1.53 0.01
 -3 6 7 0.53 0.00
 -2 6 7 -0.87 -0.01
 -1 6 7 0.94 0.00
 0 6 7 -0.19 0.00
 1 6 7 -1.30 0.00
 2 6 7 -2.26 0.01
 3 6 7 1.24 -0.01
 4 6 7 -0.27 -0.01
 5 6 7 0.11 0.00
 6 6 7 0.24 0.01
 7 6 7 -0.25 0.00
 8 6 7 -0.22 -0.01
 -9 7 7 0.13 -0.01
 -8 7 7 -0.01 0.02
 -7 7 7 -0.09 0.00
 -6 7 7 -0.32 -0.01
 -5 7 7 0.79 -0.01
 -4 7 7 -0.11 0.01
 -3 7 7 1.17 0.01
 -2 7 7 -0.30 0.00
 -1 7 7 0.15 0.00
 0 7 7 -0.10 0.00
 1 7 7 1.49 0.00
 2 7 7 -0.94 0.00
 3 7 7 1.95 0.00
 4 7 7 0.30 -0.01
 5 7 7 -0.60 0.00
 6 7 7 -0.05 0.01
 7 7 7 0.36 0.00
 8 7 7 -0.02 -0.01
 -9 8 7 0.11 -0.02
 -8 8 7 -0.03 0.01
 -7 8 7 -0.04 0.01
 -6 8 7 -0.30 0.01
 -5 8 7 0.24 -0.01
 -4 8 7 -0.32 0.00
 -3 8 7 -0.12 0.01
 -2 8 7 -0.43 0.00
 -1 8 7 -0.10 -0.01
 0 8 7 -1.35 0.00
 1 8 7 1.41 0.00
 2 8 7 -1.04 0.01
 3 8 7 -0.41 0.00
 4 8 7 -0.13 -0.01
 5 8 7 -0.52 0.00
 6 8 7 -0.52 0.01
 7 8 7 0.35 0.00
 8 8 7 0.12 -0.01
 -8 9 7 0.21 0.00
 -7 9 7 -0.06 -0.01
 -6 9 7 -0.15 0.00
 -5 9 7 0.45 -0.01
 -4 9 7 0.49 -0.01
 -3 9 7 -0.69 0.00
 -2 9 7 -0.49 0.00
 -1 9 7 1.41 -0.01
 0 9 7 -0.05 0.00
 1 9 7 0.66 0.00
 2 9 7 -0.13 0.00
 3 9 7 -0.77 0.00
 4 9 7 0.66 0.00
 5 9 7 1.05 -0.01
 6 9 7 -0.16 0.00
 7 9 7 0.08 0.01
 -8 10 7 -0.05 0.00
 -7 10 7 0.10 0.01
 -6 10 7 -0.06 0.01
 -5 10 7 -0.41 0.00
 -4 10 7 -0.04 0.00
 -3 10 7 0.06 0.01
 -2 10 7 0.48 0.01
 -1 10 7 0.65 0.00
 0 10 7 -0.73 0.01
 1 10 7 -1.48 0.00
 2 10 7 1.03 0.00
 3 10 7 0.11 0.00
 4 10 7 -0.58 0.00
 5 10 7 0.09 0.00
 6 10 7 -0.27 0.00
 7 10 7 -0.39 0.00
 -8 11 7 0.30 0.00
 -7 11 7 -0.07 -0.01
 -6 11 7 -0.30 0.00
 -5 11 7 0.00 0.00
 -4 11 7 0.33 0.00
 -3 11 7 -0.09 0.00
 -2 11 7 -0.45 0.00
 -1 11 7 -1.19 -0.02
 0 11 7 0.89 0.00
 1 11 7 -0.49 0.00
 2 11 7 0.93 0.00
 3 11 7 0.43 0.00
 4 11 7 -0.67 0.01
 5 11 7 0.06 0.00
 6 11 7 0.57 -0.01
 -7 12 7 -0.18 0.00
 -6 12 7 0.08 0.00
 -5 12 7 0.78 0.00
 -4 12 7 0.28 0.00
 -3 12 7 -0.38 0.00
 -2 12 7 0.79 0.01
 -1 12 7 -0.35 0.00
 0 12 7 1.64 0.02
 1 12 7 -0.52 0.01
 2 12 7 -0.84 0.00
 3 12 7 0.09 -0.01
 4 12 7 0.08 -0.01
 5 12 7 -0.49 0.01
 6 12 7 0.35 0.00
 -7 13 7 0.11 0.00
 -6 13 7 -0.06 -0.01
 -5 13 7 -0.32 0.00
 -4 13 7 -0.96 0.01
 -3 13 7 -0.93 0.00
 -2 13 7 1.04 0.01
 -1 13 7 -0.72 -0.03
 0 13 7 -0.25 -0.01
 1 13 7 -0.25 0.00
 2 13 7 0.07 0.00
 3 13 7 0.27 -0.01
 4 13 7 0.67 0.00
 5 13 7 -0.63 0.01
 -6 14 7 -0.38 -0.01
 -5 14 7 0.32 -0.01
 -4 14 7 0.97 0.00
 -3 14 7 0.42 0.00
 -2 14 7 0.32 0.00
 -1 14 7 -0.49 -0.01
 0 14 7 -0.04 0.01
 1 14 7 0.15 0.01
 2 14 7 0.26 0.00
 3 14 7 -0.90 0.00
 4 14 7 0.56 -0.01
 5 14 7 0.23 0.00
 -6 15 7 0.12 0.00
 -5 15 7 0.28 -0.01
 -4 15 7 -0.26 0.00
 -3 15 7 -0.53 0.00
 -2 15 7 -0.30 0.00
 -1 15 7 0.42 -0.01
 0 15 7 0.62 -0.01
 1 15 7 -0.45 0.00
 2 15 7 0.86 0.01
 3 15 7 -0.19 -0.01
 4 15 7 -0.09 -0.01
 5 15 7 -0.23 0.01
 -5 16 7 -0.03 -0.01
 -4 16 7 -0.44 0.00
 -3 16 7 0.05 0.01
 -2 16 7 -0.18 0.01
 -1 16 7 -0.33 0.00
 0 16 7 0.31 0.00
 1 16 7 -1.11 -0.01
 2 16 7 -0.03 0.00
 3 16 7 -0.06 0.01
 4 16 7 -0.14 0.00
 -4 17 7 0.07 0.00
 -3 17 7 0.57 0.00
 -2 17 7 0.51 0.00
 -1 17 7 -0.13 0.00
 0 17 7 0.72 0.00
 1 17 7 0.02 0.00
 2 17 7 0.04 0.00
 3 17 7 0.43 0.00
 -3 18 7 -0.36 0.00
 -2 18 7 -0.43 0.00
 -1 18 7 -0.45 0.00
 0 18 7 -0.13 0.00
 1 18 7 0.04 0.00
 -8 0 8 0.47 0.00
 -6 0 8 0.23 -0.01
 -4 0 8 -0.52 -0.01
 -2 0 8 -0.44 -0.01
 0 0 8 -1.33 0.02
 2 0 8 -2.65 -0.01
 4 0 8 1.52 0.01
 6 0 8 0.68 0.00
 8 0 8 0.21 0.01
 -9 1 8 -0.25 0.01
 -8 1 8 -0.03 -0.01
 -7 1 8 -0.32 0.00
 -6 1 8 -0.01 0.00
 -5 1 8 0.00 0.01
 -4 1 8 -0.14 0.01
 -3 1 8 0.71 0.01
 -2 1 8 0.16 -0.01
 -1 1 8 1.00 -0.01
 0 1 8 -1.03 0.01
 1 1 8 1.72 0.00
 2 1 8 0.51 0.00
 3 1 8 0.62 -0.01
 4 1 8 0.77 0.00
 5 1 8 -1.29 0.00
 6 1 8 -0.68 0.01
 7 1 8 -0.04 -0.01
 8 1 8 0.39 0.00
 -9 2 8 -0.08 0.02
 -8 2 8 0.00 0.00
 -7 2 8 -0.09 0.01
 -6 2 8 0.34 0.00
 -5 2 8 0.08 0.00
 -4 2 8 -0.32 0.00
 -3 2 8 0.14 0.01
 -2 2 8 -1.43 0.00
 -1 2 8 0.19 -0.01
 0 2 8 -1.23 0.00
 1 2 8 0.48 0.00
 2 2 8 0.08 0.00
 3 2 8 -1.13 -0.02
 4 2 8 -0.36 0.00
 5 2 8 0.50 0.01
 6 2 8 0.24 0.01
 7 2 8 -0.12 -0.01
 8 2 8 0.33 0.00
 -9 3 8 0.34 -0.01
 -8 3 8 -0.04 -0.02
 -7 3 8 -0.09 0.00
 -6 3 8 0.43 0.01
 -5 3 8 -0.07 -0.01
 -4 3 8 -0.28 -0.01
 -3 3 8 0.82 0.00
 -2 3 8 -0.08 0.00
 -1 3 8 1.49 0.00
 0 3 8 0.74 0.00
 1 3 8 -0.12 0.00
 2 3 8 0.09 0.01
 3 3 8 -0.04 0.00
 4 3 8 -0.45 0.00
 5 3 8 0.80 0.00
 6 3 8 0.09 0.01
 7 3 8 -0.38 0.00
 8 3 8 -0.01 -0.01
 -9 4 8 0.06 0.01
 -8 4 8 -0.36 0.00
 -7 4 8 -0.29 -0.01
 -6 4 8 0.22 0.01
 -5 4 8 -0.48 0.00
 -4 4 8 -0.58 0.00
 -3 4 8 0.15 0.01
 -2 4 8 -0.22 0.01
 -1 4 8 -0.90 0.00
 0 4 8 -0.72 -0.01
 1 4 8 -1.19 -0.01
 2 4 8 -0.21 0.01
 3 4 8 1.07 0.00
 4 4 8 -0.37 0.00
 5 4 8 0.12 0.00
 6 4 8 -0.08 0.00
 7 4 8 -0.11 0.00
 8 4 8 -0.33 0.00
 -9 5 8 0.16 0.00
 -8 5 8 -0.09 -0.01
 -7 5 8 -0.02 -0.01
 -6 5 8 0.46 0.02
 -5 5 8 0.18 0.00
 -4 5 8 0.67 -0.02
 -3 5 8 0.07 0.00
 -2 5 8 0.73 0.00
 -1 5 8 -0.51 0.00
 0 5 8 0.92 0.01
 1 5 8 1.31 0.00
 2 5 8 0.52 0.00
 3 5 8 0.30 0.00
 4 5 8 -0.62 0.00
 5 5 8 -0.23 0.00
 6 5 8 0.10 0.00
 7 5 8 0.49 0.00
 8 5 8 -0.36 0.00
 -9 6 8 0.17 0.02
 -8 6 8 0.04 0.00
 -7 6 8 0.05 -0.01
 -6 6 8 0.09 0.00
 -5 6 8 -0.68 0.01
 -4 6 8 0.05 0.00
 -3 6 8 -1.12 0.00
 -2 6 8 0.52 -0.01
 -1 6 8 -0.68 0.00
 0 6 8 -0.37 0.01
 1 6 8 -0.44 -0.01
 2 6 8 -0.65 0.00
 3 6 8 -1.07 0.00
 4 6 8 0.04 0.01
 5 6 8 0.38 0.00
 6 6 8 -0.19 -0.01
 7 6 8 0.28 0.00
 8 6 8 -0.31 0.01
 -9 7 8 -0.10 0.01
 -8 7 8 -0.16 -0.02
 -7 7 8 -0.05 -0.01
 -6 7 8 0.17 0.01
 -5 7 8 -0.30 0.01
 -4 7 8 0.67 -0.01
 -3 7 8 -0.43 0.00
 -2 7 8 0.98 0.00
 -1 7 8 0.47 0.00
 0 7 8 0.55 0.01
 1 7 8 -0.40 -0.01
 2 7 8 1.18 -0.01
 3 7 8 0.09 0.00
 4 7 8 0.53 0.01
 5 7 8 0.63 0.00
 6 7 8 -0.31 -0.01
 7 7 8 0.01 0.00
 -8 8 8 -0.12 0.01
 -7 8 8 0.30 0.01
 -6 8 8 0.25 0.00
 -5 8 8 -0.52 0.01
 -4 8 8 0.23 0.01
 -3 8 8 0.16 0.00
 -2 8 8 0.15 -0.01
 -1 8 8 -1.48 -0.01
 0 8 8 -0.37 0.01
 1 8 8 -1.17 0.00
 2 8 8 1.16 0.00
 3 8 8 -0.33 -0.01
 4 8 8 -1.15 0.01
 5 8 8 -0.23 0.01
 6 8 8 -0.08 -0.01
 7 8 8 -0.26 -0.01
 -8 9 8 -0.01 0.00
 -7 9 8 0.01 -0.01
 -6 9 8 -0.06 -0.01
 -5 9 8 0.02 0.00
 -4 9 8 0.01 0.00
 -3 9 8 -0.34 -0.01
 -2 9 8 0.10 -0.01
 -1 9 8 -0.23 0.00
 0 9 8 2.20 0.00
 1 9 8 0.07 0.00
 2 9 8 -0.03 0.00
 3 9 8 0.08 0.00
 4 9 8 0.07 0.00
 5 9 8 0.44 0.01
 6 9 8 0.60 0.00
 7 9 8 -0.02 -0.01
 -8 10 8 -0.47 0.01
 -7 10 8 0.17 0.01
 -6 10 8 0.26 0.00
 -5 10 8 0.09 0.00
 -4 10 8 -0.26 0.01
 -3 10 8 -0.15 0.01
 -2 10 8 1.09 0.01
 -1 10 8 -0.59 0.01
 0 10 8 -0.35 0.00
 1 10 8 -0.83 0.01
 2 10 8 -0.71 0.00
 3 10 8 0.23 0.00
 4 10 8 0.17 -0.01
 5 10 8 -0.67 0.00
 6 10 8 -0.02 0.00
 -7 11 8 0.24 0.00
 -6 11 8 -0.27 0.00
 -5 11 8 -0.48 0.00
 -4 11 8 0.15 0.00
 -3 11 8 -0.22 -0.01
 -2 11 8 0.31 -0.02
 -1 11 8 -0.56 0.00
 0 11 8 -0.58 -0.02
 1 11 8 1.03 0.00
 2 11 8 0.59 0.00
 3 11 8 -0.06 0.01
 4 11 8 0.55 0.01
 5 11 8 -0.10 0.00
 6 11 8 -0.18 0.00
 -6 12 8 0.11 0.00
 -5 12 8 0.25 0.00
 -4 12 8 0.96 0.00
 -3 12 8 -0.25 0.00
 -2 12 8 -0.34 0.00
 -1 12 8 0.82 0.04
 0 12 8 0.05 0.00
 1 12 8 0.26 0.00
 2 12 8 -0.13 0.00
 3 12 8 -1.01 0.00
 4 12 8 0.04 0.00
 5 12 8 0.33 -0.01
 -6 13 8 0.34 0.00
 -5 13 8 -0.64 0.01
 -4 13 8 -0.52 0.00
 -3 13 8 -0.33 0.00
 -2 13 8 -0.28 -0.02
 -1 13 8 0.48 0.01
 0 13 8 -0.61 -0.02
 1 13 8 -0.63 -0.01
 2 13 8 0.65 0.00
 3 13 8 0.24 0.00
 4 13 8 -0.50 0.01
 5 13 8 0.15 0.00
 -6 14 8 0.03 0.00
 -5 14 8 -0.24 0.00
 -4 14 8 0.41 0.00
 -3 14 8 0.76 0.00
 -2 14 8 -0.05 -0.01
 -1 14 8 -0.04 0.02
 0 14 8 0.29 0.01
 1 14 8 -0.02 0.00
 2 14 8 -0.29 -0.01
 3 14 8 0.44 0.00
 4 14 8 -0.18 0.01
 -5 15 8 0.14 0.01
 -4 15 8 0.02 0.01
 -3 15 8 -0.14 0.00
 -2 15 8 -0.01 -0.01
 -1 15 8 -0.33 0.00
 0 15 8 -0.10 0.00
 1 15 8 0.68 0.00
 2 15 8 -0.44 -0.01
 3 15 8 0.56 0.00
 4 15 8 -0.58 0.00
 -4 16 8 -0.15 0.00
 -3 16 8 -0.54 0.00
 -2 16 8 0.20 0.00
 -1 16 8 0.16 0.00
 0 16 8 -0.62 0.00
 1 16 8 0.73 0.00
 2 16 8 -0.89 -0.01
 3 16 8 0.05 0.00
 -3 17 8 0.13 0.00
 -2 17 8 0.41 0.00
 -1 17 8 0.47 0.00
 0 17 8 -0.80 0.00
 1 17 8 0.83 0.01
 2 17 8 0.02 0.00
 -9 0 9 0.04 0.00
 -7 0 9 0.19 0.00
 -5 0 9 -0.45 -0.02
 -3 0 9 -0.44 -0.01
 -1 0 9 0.55 0.00
 1 0 9 -0.17 0.00
 3 0 9 -0.44 0.01
 5 0 9 1.60 -0.01
 7 0 9 -0.02 0.01
 -9 1 9 0.01 -0.02
 -8 1 9 -0.05 -0.01
 -7 1 9 0.06 -0.01
 -6 1 9 0.01 0.01
 -5 1 9 -0.06 0.01
 -4 1 9 0.56 0.00
 -3 1 9 0.04 -0.01
 -2 1 9 0.23 0.01
 -1 1 9 0.34 0.01
 0 1 9 -0.11 -0.01
 1 1 9 -0.95 -0.01
 2 1 9 0.35 0.00
 3 1 9 0.70 0.01
 4 1 9 -0.90 0.00
 5 1 9 0.23 -0.01
 6 1 9 -0.36 0.00
 7 1 9 -0.06 0.01
 -9 2 9 -0.22 0.00
 -8 2 9 0.01 0.02
 -7 2 9 0.03 0.00
 -6 2 9 -0.26 -0.01
 -5 2 9 -0.24 0.01
 -4 2 9 0.35 0.00
 -3 2 9 -0.51 -0.01
 -2 2 9 -0.44 0.00
 -1 2 9 -1.04 0.01
 0 2 9 0.16 0.00
 1 2 9 -0.08 0.00
 2 2 9 0.26 -0.01
 3 2 9 0.95 0.00
 4 2 9 -0.71 0.00
 5 2 9 -0.15 0.00
 6 2 9 0.13 -0.01
 7 2 9 0.14 0.00
 -9 3 9 0.03 -0.02
 -8 3 9 0.33 0.00
 -7 3 9 0.24 0.02
 -6 3 9 -0.08 -0.02
 -5 3 9 0.09 0.01
 -4 3 9 0.59 0.00
 -3 3 9 -0.31 -0.01
 -2 3 9 0.84 -0.01
 -1 3 9 0.54 0.01
 0 3 9 1.42 0.01
 1 3 9 0.43 0.00
 2 3 9 -0.91 -0.01
 3 3 9 -0.13 0.01
 4 3 9 -0.03 0.01
 5 3 9 -0.21 0.00
 6 3 9 0.52 -0.01
 7 3 9 0.43 0.00
 -8 4 9 0.14 -0.01
 -7 4 9 -0.04 0.00
 -6 4 9 -0.41 -0.06
 -5 4 9 -0.35 0.01
 -4 4 9 0.15 0.02
 -3 4 9 -0.68 0.01
 -2 4 9 -0.18 -0.01
 -1 4 9 -0.88 0.00
 0 4 9 -0.85 0.00
 1 4 9 -0.79 0.00
 2 4 9 -0.63 0.00
 3 4 9 0.02 0.00
 4 4 9 1.11 0.00
 5 4 9 -0.45 0.00
 6 4 9 -0.39 0.00
 7 4 9 -0.16 0.00
 -8 5 9 0.06 0.00
 -7 5 9 0.01 0.08
 -6 5 9 0.01 0.00
 -5 5 9 0.20 0.01
 -4 5 9 0.56 0.00
 -3 5 9 0.39 0.00
 -2 5 9 0.39 0.00
 -1 5 9 0.50 0.00
 0 5 9 0.63 0.00
 1 5 9 0.71 0.01
 2 5 9 1.20 0.00
 3 5 9 -0.11 -0.01
 4 5 9 0.53 -0.01
 5 5 9 -0.45 0.00
 6 5 9 -0.01 0.01
 7 5 9 -0.06 0.00
 -8 6 9 0.31 -0.01
 -7 6 9 0.12 0.00
 -6 6 9 -0.09 -0.05
 -5 6 9 -0.06 -0.02
 -4 6 9 -0.33 0.01
 -3 6 9 -0.21 0.00
 -2 6 9 -0.93 0.00
 -1 6 9 -0.65 -0.01
 0 6 9 -0.10 -0.01
 1 6 9 -0.64 0.00
 2 6 9 -0.38 0.01
 3 6 9 -1.30 0.00
 4 6 9 -0.14 -0.01
 5 6 9 -0.12 0.00
 6 6 9 0.40 0.00
 7 6 9 -0.30 0.00
 -8 7 9 -0.07 -0.01
 -7 7 9 -0.31 0.03
 -6 7 9 -0.17 0.03
 -5 7 9 0.37 0.01
 -4 7 9 -0.22 0.00
 -3 7 9 0.25 0.00
 -2 7 9 0.55 0.02
 -1 7 9 0.98 0.01
 0 7 9 0.94 -0.01
 1 7 9 -0.01 0.00
 2 7 9 0.11 0.01
 3 7 9 0.57 0.01
 4 7 9 1.01 -0.01
 5 7 9 -0.12 -0.01
 6 7 9 0.20 0.01
 7 7 9 -0.31 0.01
 -7 8 9 0.02 0.01
 -6 8 9 -0.04 0.00
 -5 8 9 0.23 -0.01
 -4 8 9 -0.12 -0.01
 -3 8 9 0.11 0.00
 -2 8 9 -0.23 0.00
 -1 8 9 -1.00 0.01
 0 8 9 -1.37 -0.01
 1 8 9 -0.22 0.00
 2 8 9 -0.14 0.00
 3 8 9 -0.17 0.01
 4 8 9 -0.05 0.00
 5 8 9 -0.79 -0.01
 6 8 9 0.15 0.00
 -7 9 9 -0.14 -0.01
 -6 9 9 -0.24 0.00
 -5 9 9 0.16 0.01
 -4 9 9 0.14 -0.01
 -3 9 9 -0.13 -0.01
 -2 9 9 -0.33 0.00
 -1 9 9 0.95 0.01
 0 9 9 0.79 -0.01
 1 9 9 1.25 -0.01
 2 9 9 0.10 0.00
 3 9 9 -0.37 0.01
 4 9 9 0.50 0.00
 5 9 9 -0.01 -0.01
 6 9 9 -0.03 0.00
 -6 10 9 0.17 0.01
 -5 10 9 0.15 0.01
 -4 10 9 -0.16 0.00
 -3 10 9 0.19 0.01
 -2 10 9 -0.50 0.01
 -1 10 9 0.56 0.01
 0 10 9 -0.70 0.01
 1 10 9 -0.89 0.00
 2 10 9 -0.45 0.00
 3 10 9 -0.34 0.00
 4 10 9 0.10 0.00
 5 10 9 0.14 0.00
 6 10 9 -0.07 0.00
 -6 11 9 0.01 0.00
 -5 11 9 -0.28 0.00
 -4 11 9 -0.51 -0.01
 -3 11 9 0.90 0.00
 -2 11 9 -0.54 -0.01
 -1 11 9 -0.13 -0.02
 0 11 9 -0.07 0.01
 1 11 9 0.09 0.00
 2 11 9 0.66 0.00
 3 11 9 0.55 0.00
 4 11 9 -0.13 0.00
 5 11 9 0.13 0.00
 -6 12 9 0.06 0.00
 -5 12 9 0.55 -0.01
 -4 12 9 -0.12 0.00
 -3 12 9 0.68 0.01
 -2 12 9 -0.40 0.02
 -1 12 9 0.09 -0.01
 0 12 9 0.92 0.01
 1 12 9 0.26 0.00
 2 12 9 -0.70 0.00
 3 12 9 0.00 0.00
 4 12 9 -0.25 -0.01
 5 12 9 0.03 0.00
 -5 13 9 0.12 0.00
 -4 13 9 -0.82 0.00
 -3 13 9 -0.10 0.01
 -2 13 9 -0.04 0.01
 -1 13 9 -0.55 -0.03
 0 13 9 -0.58 0.00
 1 13 9 0.08 0.01
 2 13 9 -0.41 0.01
 3 13 9 0.29 0.00
 4 13 9 0.00 0.00
 -5 14 9 0.13 -0.01
 -4 14 9 0.11 -0.01
 -3 14 9 0.23 0.00
 -2 14 9 0.46 0.02
 -1 14 9 0.58 0.00
 0 14 9 0.12 0.00
 1 14 9 0.50 0.00
 2 14 9 -0.23 0.00
 3 14 9 -0.14 0.00
 4 14 9 0.69 -0.01
 -4 15 9 0.21 -0.01
 -3 15 9 -0.07 0.00
 -2 15 9 -0.54 0.01
 -1 15 9 -0.23 0.00
 0 15 9 -0.51 -0.01
 1 15 9 -0.17 0.00
 2 15 9 0.57 0.01
 3 15 9 -0.39 0.00
 -3 16 9 0.05 0.00
 -2 16 9 -0.26 0.00
 -1 16 9 0.47 0.00
 0 16 9 0.73 0.00
 1 16 9 -0.76 -0.01
 -8 0 10 0.04 0.03
 -6 0 10 -0.01 -0.02
 -4 0 10 -0.35 0.00
 -2 0 10 0.29 -0.01
 0 0 10 1.49 0.01
 2 0 10 0.13 -0.01
 4 0 10 0.09 -0.01
 6 0 10 0.26 0.00
 -8 1 10 -0.07 -0.01
 -7 1 10 -0.14 0.00
 -6 1 10 0.06 -0.01
 -5 1 10 0.31 0.00
 -4 1 10 -0.17 0.01
 -3 1 10 0.06 0.01
 -2 1 10 0.82 0.00
 -1 1 10 -0.44 -0.01
 0 1 10 0.17 0.00
 1 1 10 -0.84 0.00
 2 1 10 -0.40 0.01
 3 1 10 -0.16 0.00
 4 1 10 0.79 -0.01
 5 1 10 -0.14 0.01
 6 1 10 0.05 0.01
 -8 2 10 -0.11 0.00
 -7 2 10 -0.09 0.00
 -6 2 10 -0.06 0.02
 -5 2 10 0.11 -0.02
 -4 2 10 -0.27 0.00
 -3 2 10 -0.24 0.01
 -2 2 10 -0.18 0.00
 -1 2 10 -1.22 -0.01
 0 2 10 -0.50 0.00
 1 2 10 0.22 0.01
 2 2 10 0.87 0.01
 3 2 10 -0.48 -0.01
 4 2 10 0.36 -0.01
 5 2 10 -0.48 0.00
 6 2 10 -0.65 0.01
 -8 3 10 -0.19 0.02
 -7 3 10 0.02 0.00
 -6 3 10 0.20 0.06
 -5 3 10 0.39 -0.03
 -4 3 10 -0.24 -0.01
 -3 3 10 0.29 0.00
 -2 3 10 0.84 0.01
 -1 3 10 1.10 0.00
 0 3 10 0.75 -0.01
 1 3 10 0.42 0.00
 2 3 10 0.71 0.00
 3 3 10 -1.00 0.00
 4 3 10 -0.06 0.00
 5 3 10 0.72 0.00
 6 3 10 0.35 0.01
 -8 4 10 -0.07 -0.02
 -7 4 10 0.05 -0.12
 -6 4 10 -0.11 0.02
 -5 4 10 0.07 -0.02
 -4 4 10 -0.73 0.00
 -3 4 10 -0.29 0.00
 -2 4 10 -0.69 0.01
 -1 4 10 -0.63 0.00
 0 4 10 -1.03 -0.01
 1 4 10 -1.13 0.00
 2 4 10 -0.09 0.00
 3 4 10 -0.31 0.00
 4 4 10 -0.30 0.00
 5 4 10 0.45 0.00
 6 4 10 -0.35 0.00
 -7 5 10 -0.11 0.01
 -6 5 10 -0.07 0.11
 -5 5 10 0.48 0.01
 -4 5 10 0.03 -0.01
 -3 5 10 0.83 -0.01
 -2 5 10 0.78 0.01
 -1 5 10 0.77 0.00
 0 5 10 0.31 0.00
 1 5 10 0.43 0.01
 2 5 10 0.88 -0.01
 3 5 10 1.13 0.00
 4 5 10 -0.37 0.00
 5 5 10 0.11 0.00
 6 5 10 0.06 0.00
 -7 6 10 0.24 -0.11
 -6 6 10 0.01 -0.04
 -5 6 10 0.04 -0.02
 -4 6 10 -0.47 0.00
 -3 6 10 -0.53 0.00
 -2 6 10 -0.98 -0.01
 -1 6 10 -0.53 0.00
 0 6 10 -0.48 0.00
 1 6 10 0.09 0.00
 2 6 10 -0.82 -0.01
 3 6 10 -0.34 0.00
 4 6 10 -0.91 0.01
 5 6 10 0.08 0.01
 6 6 10 0.24 -0.01
 -7 7 10 0.00 0.01
 -6 7 10 0.01 0.04
 -5 7 10 -0.04 0.03
 -4 7 10 0.18 0.01
 -3 7 10 0.53 0.01
 -2 7 10 0.38 0.00
 -1 7 10 1.24 0.00
 0 7 10 0.19 0.01
 1 7 10 0.42 0.01
 2 7 10 -0.18 0.00
 3 7 10 0.64 -0.01
 4 7 10 0.30 0.00
 5 7 10 0.28 0.01
 6 7 10 -0.42 0.00
 -7 8 10 0.01 0.00
 -6 8 10 0.09 -0.03
 -5 8 10 -0.37 -0.02
 -4 8 10 -0.13 0.00
 -3 8 10 0.19 0.01
 -2 8 10 -0.76 -0.02
 -1 8 10 -0.26 -0.01
 0 8 10 -1.19 0.01
 1 8 10 -0.33 0.01
 2 8 10 -0.15 0.00
 3 8 10 0.06 -0.01
 4 8 10 -0.32 0.00
 5 8 10 0.32 0.01
 6 8 10 -0.13 0.00
 -6 9 10 0.24 -0.01
 -5 9 10 -0.04 -0.01
 -4 9 10 0.11 0.01
 -3 9 10 0.39 0.01
 -2 9 10 -0.26 -0.01
 -1 9 10 0.51 -0.01
 0 9 10 0.49 0.00
 1 9 10 0.93 0.00
 2 9 10 0.41 0.01
 3 9 10 0.15 -0.01
 4 9 10 -0.52 0.00
 5 9 10 0.14 0.00
 -6 10 10 -0.02 0.01
 -5 10 10 -0.02 -0.01
 -4 10 10 -0.19 0.00
 -3 10 10 -0.25 0.01
 -2 10 10 0.13 0.01
 -1 10 10 0.19 0.00
 0 10 10 -0.45 -0.01
 1 10 10 -0.47 0.00
 2 10 10 -0.80 0.01
 3 10 10 -0.01 -0.01
 4 10 10 -0.21 0.00
 5 10 10 0.32 0.00
 -5 11 10 -0.10 0.00
 -4 11 10 0.12 0.00
 -3 11 10 -0.34 -0.01
 -2 11 10 0.37 -0.01
 -1 11 10 -0.17 0.00
 0 11 10 -0.62 0.00
 1 11 10 0.44 0.00
 2 11 10 0.42 0.00
 3 11 10 0.59 0.00
 4 11 10 0.03 0.00
 -5 12 10 0.27 0.01
 -4 12 10 0.66 0.00
 -3 12 10 -0.43 -0.01
 -2 12 10 0.31 0.00
 -1 12 10 0.65 0.02
 0 12 10 0.12 0.00
 1 12 10 0.13 -0.01
 2 12 10 -0.13 0.00
 3 12 10 -0.37 0.00
 4 12 10 -0.19 0.00
 -4 13 10 -0.01 0.01
 -3 13 10 -0.55 0.00
 -2 13 10 -0.44 -0.01
 -1 13 10 -0.26 0.00
 0 13 10 -0.46 0.01
 1 13 10 -0.47 0.00
 2 13 10 0.50 -0.01
 3 13 10 0.02 0.00
 -3 14 10 0.34 0.00
 -2 14 10 0.37 -0.01
 -1 14 10 0.62 0.00
 0 14 10 0.78 0.01
 1 14 10 -0.45 0.00
 2 14 10 0.06 0.00
 -1 15 10 -0.92 -0.01
 0 15 10 -0.13 0.01
 -7 0 11 0.28 0.00
 -5 0 11 -0.09 -0.02
 -3 0 11 -0.07 0.00
 -1 0 11 0.34 0.00
 1 0 11 1.09 -0.01
 3 0 11 -0.64 0.01
 5 0 11 -0.41 -0.01
 -7 1 11 0.06 -0.02
 -6 1 11 -0.05 0.01
 -5 1 11 0.01 0.01
 -4 1 11 0.03 0.00
 -3 1 11 0.44 -0.01
 -2 1 11 0.12 0.00
 -1 1 11 0.92 0.00
 0 1 11 -0.56 0.00
 1 1 11 -0.09 -0.01
 2 1 11 -0.29 -0.01
 3 1 11 0.23 0.01
 4 1 11 0.55 0.01
 5 1 11 0.43 0.00
 -7 2 11 0.16 -0.01
 -6 2 11 -0.20 -0.01
 -5 2 11 -0.26 0.02
 -4 2 11 -0.14 0.00
 -3 2 11 0.08 0.00
 -2 2 11 -1.29 0.00
 -1 2 11 -0.53 0.00
 0 2 11 -0.63 0.01
 1 2 11 0.07 0.00
 2 2 11 -0.33 -0.01
 3 2 11 0.32 0.00
 4 2 11 -0.47 0.01
 5 2 11 -0.63 0.00
 -7 3 11 -0.02 0.07
 -6 3 11 0.13 -0.03
 -5 3 11 0.16 0.02
 -4 3 11 0.34 -0.01
 -3 3 11 0.76 -0.01
 -2 3 11 0.36 -0.01
 -1 3 11 0.97 0.00
 0 3 11 0.82 0.00
 1 3 11 0.76 0.00
 2 3 11 -0.29 -0.01
 3 3 11 0.71 0.00
 4 3 11 0.02 0.00
 5 3 11 -0.09 0.00
 6 3 11 0.72 0.00
 -7 4 11 0.13 -0.01
 -6 4 11 0.01 -0.11
 -5 4 11 -0.51 0.02
 -4 4 11 -0.32 0.02
 -3 4 11 -0.60 0.00
 -2 4 11 -0.95 -0.01
 -1 4 11 -0.63 0.00
 0 4 11 -0.42 0.00
 1 4 11 -0.07 0.00
 2 4 11 -1.30 0.00
 3 4 11 -0.14 0.00
 4 4 11 0.17 0.00
 5 4 11 -0.36 0.00
 -7 5 11 -0.15 0.16
 -6 5 11 -0.01 0.01
 -5 5 11 -0.13 0.02
 -4 5 11 0.85 0.00
 -3 5 11 0.81 0.00
 -2 5 11 0.72 0.00
 -1 5 11 0.41 0.00
 0 5 11 -0.13 0.00
 1 5 11 0.52 0.00
 2 5 11 0.11 0.00
 3 5 11 0.60 0.00
 4 5 11 0.59 -0.01
 5 5 11 -0.18 0.00
 -7 6 11 -0.01 0.00
 -6 6 11 0.16 -0.09
 -5 6 11 -0.24 -0.03
 -4 6 11 -0.20 0.00
 -3 6 11 -0.85 0.00
 -2 6 11 -0.69 0.00
 -1 6 11 -0.36 0.00
 0 6 11 0.00 0.00
 1 6 11 0.38 -0.01
 2 6 11 -0.26 0.01
 3 6 11 -0.51 0.01
 4 6 11 -0.33 0.00
 5 6 11 0.05 -0.01
 -6 7 11 0.06 0.04
 -5 7 11 0.11 0.02
 -4 7 11 0.29 0.00
 -3 7 11 0.28 0.00
 -2 7 11 0.72 0.01
 -1 7 11 -0.01 0.01
 0 7 11 0.24 0.00
 1 7 11 0.05 -0.01
 2 7 11 -0.09 0.00
 3 7 11 0.27 0.01
 4 7 11 -0.03 0.00
 5 7 11 0.14 -0.01
 -6 8 11 -0.36 0.00
 -5 8 11 0.00 -0.01
 -4 8 11 -0.26 -0.01
 -3 8 11 -0.51 -0.01
 -2 8 11 0.46 0.00
 -1 8 11 -0.60 0.00
 0 8 11 0.00 0.00
 1 8 11 -0.48 -0.01
 2 8 11 -0.51 0.00
 3 8 11 0.35 0.01
 4 8 11 0.00 0.01
 5 8 11 0.04 0.00
 -6 9 11 0.06 0.00
 -5 9 11 0.48 0.01
 -4 9 11 0.32 0.00
 -3 9 11 -0.25 -0.01
 -2 9 11 0.45 0.00
 -1 9 11 -0.68 0.00
 0 9 11 0.65 0.01
 1 9 11 0.67 -0.01
 2 9 11 0.41 -0.01
 3 9 11 0.34 0.01
 4 9 11 -0.14 0.00
 -5 10 11 -0.07 0.01
 -4 10 11 -0.08 0.00
 -3 10 11 -0.38 -0.01
 -2 10 11 0.40 0.00
 -1 10 11 -0.26 0.00
 0 10 11 0.28 0.00
 1 10 11 -0.75 0.00
 2 10 11 -0.78 0.00
 3 10 11 -0.53 0.00
 4 10 11 0.24 0.00
 -4 11 11 0.02 0.00
 -3 11 11 0.11 0.00
 -2 11 11 0.04 -0.01
 -1 11 11 -0.53 0.00
 0 11 11 0.51 0.01
 1 11 11 0.16 0.00
 2 11 11 0.69 0.00
 3 11 11 0.24 0.00
 -3 12 11 0.36 0.00
 -2 12 11 0.21 0.00
 -1 12 11 -0.33 0.00
 0 12 11 0.37 -0.01
 1 12 11 -0.38 0.00
 2 12 11 -0.34 0.01
 -2 13 11 -0.06 0.00
 -1 13 11 -0.67 0.00
 0 13 11 0.15 0.00
 1 13 11 0.48 0.00
 -6 0 12 0.01 -0.02
 -4 0 12 0.03 -0.01
 -2 0 12 -0.57 0.00
 0 0 12 0.27 0.00
 2 0 12 -0.06 0.01
 4 0 12 -0.81 -0.01
 -6 1 12 0.22 -0.02
 -5 1 12 0.13 0.01
 -4 1 12 0.30 0.00
 -3 1 12 0.10 0.00
 -2 1 12 0.58 0.00
 -1 1 12 0.47 0.00
 0 1 12 0.08 -0.01
 1 1 12 -0.26 0.00
 2 1 12 0.21 0.01
 3 1 12 0.51 0.00
 4 1 12 0.19 -0.01
 -6 2 12 -0.12 0.01
 -5 2 12 -0.46 0.01
 -4 2 12 -0.04 0.00
 -3 2 12 -0.82 0.00
 -2 2 12 -0.38 0.01
 -1 2 12 -0.36 0.01
 0 2 12 -0.34 0.00
 1 2 12 -0.22 0.00
 2 2 12 -0.11 0.01
 3 2 12 -0.52 0.00
 4 2 12 -0.26 0.00
 -6 3 12 0.24 0.03
 -5 3 12 0.33 -0.02
 -4 3 12 0.80 -0.01
 -3 3 12 0.19 0.00
 -2 3 12 0.66 0.00
 -1 3 12 0.51 0.00
 0 3 12 -0.15 -0.01
 1 3 12 0.06 -0.01
 2 3 12 0.94 0.01
 3 3 12 0.13 0.00
 4 3 12 0.04 0.00
 -6 4 12 0.09 0.01
 -5 4 12 -0.31 -0.01
 -4 4 12 -0.57 0.00
 -3 4 12 -0.85 0.01
 -2 4 12 -0.45 0.00
 -1 4 12 0.09 0.00
 0 4 12 0.21 0.00
 1 4 12 -0.32 0.00
 2 4 12 0.12 0.00
 3 4 12 -0.71 0.00
 4 4 12 -0.30 0.00
 -6 5 12 -0.08 0.08
 -5 5 12 0.14 0.00
 -4 5 12 0.34 -0.01
 -3 5 12 0.78 0.00
 -2 5 12 0.49 0.00
 -1 5 12 -0.19 -0.01
 0 5 12 -0.16 0.01
 1 5 12 -0.80 0.00
 2 5 12 0.54 0.00
 3 5 12 0.17 -0.01
 4 5 12 0.19 0.00
 -6 6 12 0.14 -0.02
 -5 6 12 0.19 -0.01
 -4 6 12 -0.45 0.00
 -3 6 12 -0.44 0.01
 -2 6 12 -0.19 0.00
 -1 6 12 -0.06 -0.01
 0 6 12 0.72 0.00
 1 6 12 -0.21 0.00
 2 6 12 0.57 0.00
 3 6 12 -0.38 -0.01
 4 6 12 -0.04 0.00
 -5 7 12 0.01 0.01
 -4 7 12 0.12 0.00
 -3 7 12 0.21 0.00
 -2 7 12 -0.03 0.00
 -1 7 12 -0.31 -0.01
 0 7 12 0.13 0.00
 1 7 12 -0.34 0.01
 2 7 12 0.65 0.00
 3 7 12 -0.64 -0.01
 4 7 12 0.43 -0.01
 -5 8 12 -0.36 0.00
 -4 8 12 -0.07 0.00
 -3 8 12 -0.02 0.01
 -2 8 12 0.03 0.00
 -1 8 12 0.56 0.00
 0 8 12 0.00 -0.01
 1 8 12 -1.01 0.01
 2 8 12 0.21 0.01
 3 8 12 -0.77 0.00
 -4 9 12 0.39 0.00
 -3 9 12 0.28 0.01
 -2 9 12 -0.63 0.00
 -1 9 12 0.04 0.00
 0 9 12 0.14 -0.01
 1 9 12 0.33 0.00
 2 9 12 1.44 0.01
 3 9 12 -0.14 0.00
 -4 10 12 -0.23 0.00
 -3 10 12 0.08 0.00
 -2 10 12 -0.32 0.00
 -1 10 12 0.39 0.00
 0 10 12 -0.37 -0.01
 1 10 12 -0.91 0.00
 2 10 12 -0.45 0.00
 -3 11 12 0.18 0.00
 -2 11 12 -0.13 0.00
 -1 11 12 0.55 0.00
 0 11 12 0.23 0.00
 1 11 12 0.58 0.00
 -5 0 13 -0.18 -0.01
 -3 0 13 -0.14 0.00
 -1 0 13 -0.39 0.00
 1 0 13 0.17 0.00
 -5 1 13 0.31 -0.01
 -4 1 13 -0.01 0.01
 -3 1 13 0.38 0.00
 -2 1 13 0.40 -0.01
 -1 1 13 -0.29 0.00
 0 1 13 0.02 0.00
 1 1 13 0.06 0.00
 2 1 13 0.12 -0.01
 3 1 13 0.36 -0.01
 -5 2 13 -0.27 0.00
 -4 2 13 -0.77 0.01
 -3 2 13 0.00 0.00
 -2 2 13 -0.03 0.00
 -1 2 13 -0.32 0.00
 0 2 13 0.72 0.01
 1 2 13 -0.02 0.01
 2 2 13 -0.77 -0.01
 3 2 13 -0.24 0.00
 -5 3 13 0.60 -0.01
 -4 3 13 0.14 0.01
 -3 3 13 0.66 0.00
 -2 3 13 0.30 0.00
 -1 3 13 -0.93 -0.01
 0 3 13 -0.11 0.00
 1 3 13 -0.05 0.01
 2 3 13 0.20 0.00
 3 3 13 0.73 0.00
 -5 4 13 0.03 0.00
 -4 4 13 -0.63 0.01
 -3 4 13 -0.47 -0.01
 -2 4 13 0.23 0.00
 -1 4 13 0.01 0.00
 0 4 13 0.79 0.00
 1 4 13 0.45 0.00
 2 4 13 -0.49 0.00
 3 4 13 -0.31 0.00
 -4 5 13 0.31 0.00
 -3 5 13 0.10 0.00
 -2 5 13 0.25 0.00
 -1 5 13 -0.40 0.01
 0 5 13 -0.61 0.00
 1 5 13 -0.05 0.00
 2 5 13 -0.32 -0.01
 3 5 13 0.24 0.01
 -4 6 13 0.19 0.01
 -3 6 13 -0.28 0.00
 -2 6 13 0.12 0.00
 -1 6 13 0.52 0.01
 0 6 13 -0.18 0.00
 1 6 13 0.40 0.00
 2 6 13 -0.25 -0.01
 -3 7 13 -0.02 0.00
 -2 7 13 -0.51 -0.01
 -1 7 13 -0.11 0.00
 0 7 13 -0.26 0.00
 1 7 13 0.91 0.00
 2 7 13 -0.35 -0.01
 -2 8 13 0.26 0.00
 -1 8 13 0.50 0.01
 0 8 13 -0.46 0.01
 1 8 13 -0.08 0.00
 -2 0 14 -0.07 0.01
 -2 1 14 -0.12 0.01
 -1 1 14 -0.09 0.00
 0 1 14 -0.41 0.00
 -2 2 14 0.05 0.00
 -1 2 14 0.91 0.01
 0 2 14 0.23 0.00
 -2 3 14 -0.44 0.00
 -1 3 14 -0.06 0.00
 0 3 14 -0.93 0.00
 -2 4 14 -0.28 0.00
 -1 4 14 0.87 0.00
 0 4 14 0.22 0.00
 0 0 0 0.00 0.00
# SQUEEZE RESULTS (APPEND TO CIF)
# Note: Data are Listed for all Voids in the P1 Unit Cell
# i.e. Centre of Gravity, Solvent Accessible Volume,
# Recovered number of Electrons in the Void and
# Details about the Squeezed Material
;
_platon_squeeze_details           'TITL ya327 P 1 21/n 1 R = 0.07'
loop_
  _platon_squeeze_void_nr
  _platon_squeeze_void_average_x
  _platon_squeeze_void_average_y
  _platon_squeeze_void_average_z
  _platon_squeeze_void_volume
  _platon_squeeze_void_count_electrons
  _platon_squeeze_void_content
 1 0.000 0.500 0.000 117 29 ' '
 2 0.500 1.000 0.500 117 29 ' '

loop_
  _refln_index_h
  _refln_index_k
  _refln_index_l
  _refln_F_squared_meas
  _refln_F_squared_sigma
 0 0 1 0.33 0.08
 0 0 1 0.19 0.06
 0 0 2 1152.77 5.3
 0 0 2 1162.76 7.16
 0 0 3 0.14 0.08
 0 0 3 0.12 0.06
 0 0 -4 88.39 2.95
 0 0 4 100.65 2.69
 0 0 -5 0.14 0.2
 0 0 -6 66.64 3.34
 0 0 7 0.18 0.21
 0 0 -7 0.49 0.36
 0 0 -8 818.89 14.94
 0 0 8 940.97 19.13
 0 0 9 -0.34 0.72
 0 0 10 173.74 9.85
 0 0 11 0.04 0.31
 0 0 12 27.86 3.86
 0 0 12 20.79 2.99
 0 0 13 0.38 0.37
 0 -1 1 2196.83 10.92
 0 1 -1 2196.65 10.28
 0 1 -2 1613.37 9.88
 0 -1 -2 1515.05 7.06
 0 1 2 1506.82 7.04
 0 1 2 1581.51 7.59
 0 -1 2 1591.11 9.95
 0 -1 3 55.88 1.99
 0 1 3 61.1 1.57
 0 1 -4 59.18 2.42
 0 -1 -4 61.82 2.57
 0 1 5 86.92 2.72
 0 -1 -5 96.55 3.56
 0 1 -5 94.53 3.54
 0 1 -6 383.18 7.85
 0 -1 -6 402.85 8.15
 0 1 7 398.57 10.75
 0 -1 -7 346.73 8.46
 0 1 -7 346.98 8.68
 0 -1 7 378.04 10.86
 0 -1 8 37.52 3.84
 0 1 -8 30.89 2.84
 0 -1 -8 30.07 2.77
 0 -1 9 494.34 16.21
 0 1 10 9.54 2.29
 0 -1 10 10.5 2.45
 0 1 11 2.47 1.22
 0 -1 11 1.19 0.77
 0 -1 12 25.58 3.71
 0 -1 12 20.23 2.96
 0 1 12 21.31 2.98
 0 1 12 26.22 3.62
 0 -1 13 0.12 0.35
 0 1 13 0.37 0.27
 0 -1 14 13.95 1.6
 0 -2 0 449.22 3.17
 0 -2 -1 148.99 2.13
 0 2 -1 114.3 2.74
 0 2 2 176.07 2.07
 0 -2 2 161.37 3.33
 0 -2 -2 175.85 1.71
 0 2 -2 167.07 3.23
 0 2 3 383.46 3.71
 0 -2 3 379.29 5.87
 0 -2 -4 32.71 0.85
 0 2 4 34.34 1.31
 0 2 5 195.05 3.87
 0 2 -5 200.86 5.24
 0 2 6 103.38 3.32
 0 -2 -6 115.12 4.42
 0 2 -6 110.98 4.46
 0 2 -7 408.97 9.5
 0 -2 7 436.96 11.89
 0 -2 -7 440.44 9.77
 0 -2 -8 152.73 6.1
 0 -2 8 169.03 8.34
 0 2 -8 154.48 6.84
 0 -2 9 0.54 0.77
 0 2 10 43.59 4.85
 0 -2 10 43.49 4.93
 0 2 11 226.55 10.63
 0 -2 11 225.59 10.85
 0 -2 12 15.19 2.83
 0 -2 12 12.01 2.28
 0 2 12 15.76 2.67
 0 -2 13 83.63 5.62
 0 -2 14 0.11 0.2
 0 -3 0 0.38 0.12
 0 -3 1 573.52 3.56
 0 -3 -1 594.89 5.69
 0 3 -2 36.85 1.99
 0 -3 -3 208.81 1.91
 0 3 3 195.82 2.6
 0 3 -3 223.38 4.82
 0 -3 -3 184.49 3.12
 0 3 -4 673.94 9.34
 0 3 4 678.35 6.09
 0 3 -5 10.04 1.24
 0 -3 -5 11.65 1.31
 0 -3 6 946.76 15.83
 0 -3 -6 976.27 13.38
 0 3 -6 953.52 13.97
 0 3 -7 0.93 0.47
 0 -3 -7 0.5 0.43
 0 -3 7 2.03 0.85
 0 -3 -8 86.74 4.67
 0 3 -8 90.59 5.5
 0 -3 8 88.9 6.2
 0 -3 9 81.7 6.72
 0 3 9 80.94 6.37
 0 -3 9 72.61 6.19
 0 -3 10 37.7 4.67
 0 3 10 33.95 4.19
 0 -3 10 30.53 4.09
 0 -3 11 84.16 6.54
 0 3 11 82.66 6.16
 0 -3 12 125.5 8.24
 0 -3 13 1.7 0.86
 0 -3 14 86.26 4.09
 0 -4 0 377.95 3.71
 0 -4 -1 1026.16 8.82
 0 -4 1 986.28 8.36
 0 -4 -2 662.16 6.13
 0 4 -2 586.89 8.81
 0 4 3 71.38 1.64
 0 -4 -3 70.18 1.53
 0 4 4 11.07 0.73
 0 -4 -4 9.9 0.78
 0 -4 5 269.18 7.45
 0 -4 -5 313.22 6.95
 0 4 -5 328.02 8.28
 0 4 5 255.59 4.05
 0 -4 6 382.76 10.18
 0 4 -6 377.12 9.71
 0 -4 -6 369.26 8.27
 0 -4 -7 16.78 1.88
 0 -4 7 19.49 2.58
 0 4 -7 19.56 2.48
 0 -4 -8 269.24 8.38
 0 4 -8 264.9 10.12
 0 -4 9 4.55 1.61
 0 -4 9 4.61 1.57
 0 -4 10 160.57 9.71
 0 -4 10 138.08 8.54
 0 -4 11 35.54 4.2
 0 -4 11 42.82 4.77
 0 -4 12 58.65 5.55
 0 -4 13 34.01 3.49
 0 -4 14 1.02 0.36
 0 -5 0 0.12 0.1
 0 -5 -1 1444.96 11.93
 0 -5 1 1372.3 10.63
 0 5 -2 94.82 3.42
 0 -5 2 86.66 2.94
 0 -5 -2 89.09 2.52
 0 -5 3 185.51 4.93
 0 5 -3 245.54 6.65
 0 5 -4 31.8 2.6
 0 -5 4 33.93 2.39
 0 5 4 34.93 1.26
 0 5 5 657.54 6.66
 0 5 -5 702.78 13.53
 0 -5 5 681.34 12.42
 0 -5 -6 23.68 2.14
 0 -5 6 23.37 2.58
 0 5 -6 24.82 2.68
 0 -5 7 328.5 10.86
 0 5 -7 301.75 10.02
 0 -5 -7 298.55 8.05
 0 5 -8 12.87 2.11
 0 -5 -8 13.44 1.9
 0 -5 8 13.19 2.49
 0 -5 9 302.67 13.29
 0 -5 9 251.22 11.19
 0 -5 10 0.55 0.85
 0 -5 10 1.16 0.9
 0 -5 11 127.33 8.19
 0 -5 11 108.54 7.12
 0 -5 12 1.62 0.75
 0 -5 12 1.7 0.78
 0 -5 13 6.12 1.42
 0 -6 0 687.5 5.76
 0 6 0 676.82 8.37
 0 6 -1 1.39 0.41
 0 -6 1 0.98 0.29
 0 -6 -1 0.86 0.29
 0 6 -2 696.3 10.3
 0 -6 -2 641.96 7.86
 0 -6 2 606.53 8.35
 0 6 -2 695.52 7.82
 0 6 -3 355.12 7.17
 0 -6 3 359.87 7.19
 0 6 4 96.8 2.18
 0 -6 4 103.48 4.34
 0 -6 -4 101.71 3.19
 0 6 5 440.45 5.36
 0 -6 5 480.27 10.59
 0 -6 -6 175.93 5.94
 0 -6 6 173.99 6.14
 0 -6 6 171.13 7.12
 0 -6 -7 7.24 1.24
 0 6 -7 9.04 1.77
 0 -6 7 5.93 1.5
 0 -6 -8 110.9 5.49
 0 -6 9 5.04 1.57
 0 -6 9 8.5 2.34
 0 -6 10 45.7 5.2
 0 -6 10 35.97 4.17
 0 -6 11 37.31 4.44
 0 -6 12 6.74 1.69
 0 -6 12 5.39 1.53
 0 -6 13 56.38 4.1
 0 7 0 0.88 0.34
 0 -7 0 0.3 0.2
 0 -7 -1 220.3 5.26
 0 7 -1 227.22 5.51
 0 -7 1 217.35 4.32
 0 -7 -2 430.28 6.92
 0 -7 2 403.17 6.97
 0 7 -2 419.87 8.45
 0 7 -3 24.16 1.75
 0 -7 3 21.27 1.78
 0 7 -3 26.42 2.34
 0 -7 4 1129.88 15.13
 0 7 4 1089.73 8.49
 0 7 -4 1190.97 17.03
 0 -7 -4 1196.73 12.43
 0 7 -5 4.24 1.03
 0 -7 5 3.26 0.9
 0 -7 5 3.48 0.84
 0 7 5 3.87 0.51
 0 -7 6 494.4 10.87
 0 -7 6 494.31 12.6
 0 -7 7 17.99 2.67
 0 -7 -7 14.58 1.81
 0 -7 8 22.24 3.02
 0 -7 8 22.8 3.56
 0 -7 9 0.47 0.21
 0 -7 9 0.49 0.67
 0 -7 10 95.43 7.42
 0 -7 10 75.85 5.85
 0 -7 11 0.89 0.7
 0 -7 11 0.5 0.28
 0 -7 12 69.59 5.35
 0 -7 12 71.59 5.19
 0 -7 13 2.75 0.79
 0 -7 13 2.34 0.82
 0 8 0 379.46 7.25
 0 -8 0 360.45 7.45
 0 -8 -1 339.03 6.98
 0 -8 1 323.38 7.41
 0 -8 -2 653.52 9.25
 0 -8 2 620.64 9.02
 0 -8 2 628.44 10.85
 0 -8 3 675.67 10.72
 0 8 -3 814.43 13.97
 0 -8 4 35.63 2.8
 0 -8 4 35.83 2.72
 0 -8 -4 39.29 2.34
 0 8 4 37.6 1.56
 0 8 -4 39.74 3.32
 0 -8 5 708.67 13.31
 0 -8 5 703.92 13.78
 0 -8 -5 762.86 11.73
 0 8 -5 778.7 16.03
 0 -8 6 26.37 2.66
 0 -8 6 29.25 3.13
 0 8 -6 26.22 3.14
 0 -8 -6 29.18 2.41
 0 -8 7 253.18 10.08
 0 8 -7 148.04 8.06
 0 -8 8 59.21 4.89
 0 -8 8 70.93 6.25
 0 -8 9 8.34 1.92
 0 -8 9 11.19 2.64
 0 -8 10 50.5 5.34
 0 -8 10 53.64 5.54
 0 -8 11 98.12 6.96
 0 -8 11 92.15 6.73
 0 -8 12 4.12 1.21
 0 -8 12 6.34 1.48
 0 -8 13 101.62 4.69
 0 -9 0 0.34 0.3
 0 -9 -1 876.03 12.2
 0 9 -1 878.15 12.67
 0 -9 -2 1.86 0.52
 0 -9 2 1.54 0.57
 0 9 -2 1.06 0.56
 0 -9 3 172.56 6.2
 0 -9 3 178.39 5.63
 0 -9 -4 269.91 6.56
 0 -9 4 264.36 7.6
 0 -9 4 254.35 7.86
 0 -9 5 30.59 2.82
 0 -9 5 29.56 2.86
 0 9 -5 28.86 3.23
 0 -9 6 212.47 8.53
 0 -9 6 218.87 8.13
 0 9 -6 209.49 9.51
 0 -9 7 231.48 10.74
 0 -9 8 35.83 4.46
 0 -9 9 190.47 10.53
 0 -9 9 195.17 10.29
 0 -9 10 50.66 5.27
 0 -9 10 46.35 4.86
 0 -9 11 41.72 4.39
 0 -9 11 39.7 4.13
 0 -9 12 59.59 4.28
 0 -9 12 56.46 4.19
 0 -10 0 569.96 10.6
 0 10 -1 17.95 1.9
 0 -10 1 15.9 1.82
 0 -10 -1 16.83 1.77
 0 10 -2 593.79 11.61
 0 -10 -2 606.48 10.13
 0 -10 3 1.99 0.75
 0 10 -3 1.24 0.63
 0 10 -4 5.63 1.37
 0 -10 4 6.68 1.33
 0 10 -5 55.54 4.61
 0 -10 5 53.77 4
 0 -10 5 59.74 4.2
 0 -10 6 103.97 5.83
 0 -10 6 106.23 6.28
 0 -10 7 6.09 1.75
 0 -10 8 285.09 12.58
 0 -10 9 1.31 0.73
 0 -10 9 4.14 1.7
 0 -10 10 323.87 12.06
 0 -10 10 316.95 12.88
 0 -10 11 0.02 0.72
 0 -10 11 -0.39 0.72
 0 -10 12 19.21 2.11
 0 -10 12 20.2 2.32
 0 -11 0 0.43 0.31
 0 -11 -1 167.72 5.81
 0 -11 1 163.1 6.14
 0 11 -2 231.54 7.81
 0 -11 2 199.9 7.12
 0 -11 3 68.03 4.31
 0 -11 -3 69.58 3.76
 0 11 -3 73.64 4.52
 0 -11 -4 116.59 4.72
 0 -11 4 126.32 6.15
 0 11 -5 81.84 5.72
 0 -11 5 77.08 5
 0 -11 6 168.03 8.73
 0 -11 -6 192.84 7.87
 0 -11 7 433.35 14.9
 0 -11 8 158.16 9.23
 0 -11 9 58.05 5.57
 0 -11 10 13.15 2.5
 0 -11 11 36.85 3.21
 0 -11 11 27.78 3.16
 0 -11 12 39.7 2.96
 0 -12 0 5.78 1.17
 0 -12 -1 203.66 6.72
 0 -12 1 197.43 7.19
 0 -12 2 103.06 5.32
 0 12 -2 107.06 5.51
 0 -12 3 249 8.67
 0 -12 -3 256.7 7.56
 0 -12 -4 12.18 1.58
 0 -12 4 11.84 1.98
 0 -12 -5 423.8 11.95
 0 -12 5 401.61 12.84
 0 -12 6 211.65 9.89
 0 -12 -6 245.64 8.93
 0 -12 7 102.31 7.18
 0 -12 8 33.58 4.2
 0 -12 9 42.87 4.61
 0 -12 10 2.81 1.08
 0 -12 10 2.54 0.85
 0 -12 11 62.04 3.41
 0 -12 11 40.96 3.52
 0 -13 0 0.67 0.44
 0 -13 1 43.22 3.51
 0 -13 2 169.85 7.28
 0 -13 -2 179.2 6.64
 0 -13 3 82.31 5.77
 0 -13 -3 82.9 5.38
 0 -13 -4 1010.41 18.99
 0 -13 4 919.48 20.28
 0 -13 5 1.32 0.48
 0 -13 -5 0.13 0.41
 0 -13 5 0.38 0.45
 0 -13 6 314.3 11.93
 0 -13 -6 338.57 10.34
 0 -13 7 35.75 4.02
 0 -13 -7 39.33 3.29
 0 -13 7 40.95 4.44
 0 -13 8 32.68 3.66
 0 -13 8 30.73 3.84
 0 -13 9 85.79 6.11
 0 -13 -9 77.49 4.02
 0 -13 10 23.6 2.36
 0 -13 10 16.01 2.36
 0 -13 11 4.44 1.03
 0 -14 0 644.25 15.51
 0 -14 -1 0.85 0.24
 0 -14 1 2.31 1.16
 0 -14 1 1.71 0.69
 0 -14 2 468.78 13.62
 0 -14 -2 384.64 11.94
 0 -14 3 1.74 0.86
 0 -14 -3 1.63 0.66
 0 -14 -4 50.07 4.22
 0 -14 4 47.67 4.52
 0 -14 5 181.04 8.9
 0 -14 -5 260.69 9.39
 0 -14 6 57.92 5.01
 0 -14 6 49.2 4.63
 0 -14 -6 58.71 4.19
 0 -14 7 52.02 4.63
 0 -14 7 54.96 4.92
 0 -14 -7 56.79 3.89
 0 -14 8 302.52 10.32
 0 -14 8 284.07 10.97
 0 -14 9 3.38 1.16
 0 -14 9 4.76 1.11
 0 -14 -9 2.42 0.63
 0 -14 10 120.48 4.35
 0 -14 10 48.81 3.72
 0 -15 0 -0.06 0.65
 0 -15 1 493.43 13.81
 0 -15 -1 455.62 13.23
 0 -15 -2 20.09 2.7
 0 -15 2 25.28 3.24
 0 -15 3 36.46 3.82
 0 -15 -3 32.63 3.42
 0 -15 -4 53.4 4.3
 0 -15 4 46.26 4.28
 0 -15 5 12.41 2.21
 0 -15 -5 14.74 2.18
 0 -15 6 20.56 2.8
 0 -15 6 17.42 2.54
 0 -15 -6 19.27 2.34
 0 -15 -7 217.23 7.37
 0 -15 7 212.04 9.11
 0 -15 7 214.47 8.51
 0 -15 8 7.6 1.42
 0 -15 -8 7.08 1.18
 0 -15 8 6.88 1.56
 0 -15 -9 88.22 3.71
 0 -15 9 93.54 5.29
 0 -15 10 -0.2 0.25
 0 -16 0 408.49 12.57
 0 -16 -1 65.93 5
 0 -16 1 69.43 5.19
 0 -16 2 192.86 8.6
 0 -16 -2 182.08 8.2
 0 -16 -3 273.24 9.83
 0 -16 3 260.83 9.84
 0 -16 -4 0.54 0.58
 0 -16 4 2.49 1.17
 0 -16 5 286.71 10.07
 0 -16 -5 293.47 9.44
 0 -16 -6 30.64 2.84
 0 -16 6 30.76 3.13
 0 -16 -7 43.4 3.06
 0 -16 7 44.92 3.78
 0 -16 7 50.64 3.67
 0 -16 8 131.04 6.02
 0 -16 -8 116.28 4.57
 0 -16 -9 2.69 0.55
 0 -17 0 0.51 0.55
 0 -17 -1 39.94 3.83
 0 -17 1 39.7 3.91
 0 -17 -2 298.15 10.26
 0 -17 -3 71.58 4.9
 0 -17 4 690.12 14.85
 0 -17 -4 683.95 14.69
 0 -17 -5 17.88 2.27
 0 -17 5 16.54 2.23
 0 -17 6 303.32 8.6
 0 -17 -6 250.66 7.79
 0 -17 -7 5.08 0.94
 0 -17 7 6.55 1.15
 0 -17 -8 14.67 1.44
 0 -18 0 27.18 3.14
 0 -18 1 120.55 6.67
 0 -18 -1 119.69 6.49
 0 -18 -2 51.08 4.13
 0 -18 -3 341.95 10.36
 0 -18 -4 21.02 2.44
 0 -18 -5 247.52 7.91
 0 -18 -6 10.28 1.43
 0 -18 -7 46.73 2.57
 0 -18 -7 48.14 2.73
 0 -19 0 0.63 0.43
 0 -19 -1 151.48 7.02
 0 -19 -2 44.7 3.67
 0 -19 -3 68.71 4.35
 0 -19 -4 115.16 5.34
 0 -19 -5 10.48 1.45
 0 -19 -6 34.55 2.37
 0 -19 -6 37.98 2.41
 0 -20 0 358.89 9.99
 0 -20 -1 3.01 0.91
 0 -20 -2 191.26 7.09
 0 -20 -3 3.44 0.9
 0 -20 -4 1.09 0.46
 0 -20 -5 5.45 0.87
 0 -20 -5 5.84 0.93
 0 -21 -1 129.67 5.13
 0 -21 -2 161.2 5.62
 0 -21 -3 98.6 4.11
 -1 0 14 0.13 0.15
 -1 0 13 2.07 0.96
 -1 0 13 1.14 0.65
 -1 0 12 0.39 0.53
 -1 0 11 16.4 3.2
 -1 0 10 0.81 1.1
 -1 0 9 376.28 14.66
 1 0 -8 0.45 0.57
 1 0 -7 422.93 10.12
 1 0 -6 0.16 0.23
 -1 0 5 567.2 8.52
 1 0 -5 500.19 8.63
 -1 0 4 0.38 0.2
 1 0 -4 0.03 0.16
 -1 0 3 2.4 0.41
 -1 0 2 0.2 0.12
 -1 0 1 5836.36 23.02
 1 0 -1 5738.56 27.11
 1 0 0 0.07 0.04
 1 0 1 5084.93 21.95
 1 0 1 5076.27 17.7
 1 0 2 0.32 0.17
 1 0 2 0.78 0.12
 1 0 3 740.04 7.29
 1 0 3 685.16 8.68
 1 0 4 0.53 0.32
 1 0 4 0.03 0.15
 -1 0 -5 13.98 1.39
 1 0 5 12.69 1.23
 1 0 5 10.89 1.39
 -1 0 -6 0.45 0.23
 1 0 6 0.57 0.38
 -1 0 -7 258.83 7.18
 1 0 7 256.47 8.52
 1 0 8 0.04 0.28
 -1 0 -8 0.18 0.28
 1 0 9 361.7 12.48
 1 0 10 0.3 0.38
 1 0 11 211.02 10.73
 1 0 12 0.09 0.53
 1 0 13 7.56 1.54
 -1 -1 14 6.59 1.13
 -1 -1 13 16.52 2.3
 -1 1 13 19.59 2.66
 -1 -1 13 21.15 2.91
 -1 -1 12 6.63 1.8
 -1 1 12 7.78 1.91
 -1 1 11 18.7 3.37
 -1 -1 11 16.93 3.26
 -1 -1 10 157.27 10.49
 -1 1 10 157.01 10.45
 -1 -1 9 1.02 1.02
 1 -1 -8 278.78 9.33
 1 1 -8 249.87 9.31
 1 1 -7 185.14 7.1
 1 -1 -7 177.01 6.42
 1 -1 -6 508.54 9.72
 1 1 -6 501.55 10.26
 1 -1 -5 178.53 4.92
 -1 1 5 191.43 4.42
 -1 -1 5 191.49 5.34
 1 1 -5 177.91 5.26
 -1 1 4 167.6 3.59
 -1 -1 4 168.47 4.35
 1 1 -4 160.13 4.45
 1 -1 -3 1168.13 9.79
 -1 1 3 1151.82 8.6
 1 -1 -2 94.66 1.92
 1 -1 -2 103.11 2.4
 -1 1 2 128.48 2.31
 -1 -1 2 117.28 2.84
 1 -1 -1 187.43 1.87
 1 -1 -1 197.24 2.25
 1 1 0 1366.68 6.28
 -1 1 0 1311.98 5.69
 1 -1 0 1334.92 6.99
 1 1 0 1379.54 7.39
 1 -1 1 167.17 2.83
 1 -1 1 169.54 1.88
 1 -1 1 169.26 2.37
 1 1 2 2050.38 13.28
 1 -1 2 2073.71 11.06
 1 1 3 494.4 7.11
 1 1 3 497.3 5.48
 1 -1 3 476.43 7.53
 1 -1 3 459.72 4.45
 1 -1 3 477.23 4.88
 1 1 4 19.93 1.62
 1 -1 4 23.66 1.58
 1 -1 4 20.29 1.74
 1 1 4 22.75 1.33
 -1 1 -5 300.14 6.39
 1 1 5 314.22 7.28
 1 -1 5 301.15 7.45
 1 1 5 314.63 5.81
 -1 -1 -6 84.67 3.87
 1 -1 6 93.22 4.63
 1 1 6 92.04 3.52
 1 1 6 97.8 4.59
 1 1 7 59.84 3.96
 -1 -1 -7 58.36 3.46
 1 -1 7 61.42 4.23
 -1 1 -7 60.15 3.48
 1 -1 8 632.44 15.17
 1 1 8 669.65 14.99
 -1 1 -8 566.07 11.91
 -1 -1 -8 567.72 12.01
 1 -1 9 6.04 1.58
 1 1 9 4.49 1.31
 1 -1 10 67.6 5.58
 1 1 10 72.14 5.65
 1 1 11 27.13 3.76
 1 -1 11 27.6 3.93
 1 -1 12 16.2 2.73
 1 1 12 15.99 2.6
 1 -1 13 19.34 2.51
 1 1 13 20.56 2.4
 -1 -2 14 39.63 2.82
 -1 -2 13 3.5 1.32
 -1 2 13 3.29 1.05
 -1 2 12 160.11 8.45
 -1 -2 12 147.1 8.42
 -1 2 11 10.54 2.49
 -1 -2 11 9.83 2.45
 -1 2 10 72.73 7.05
 -1 -2 10 64.43 6.64
 -1 -2 10 76.51 7.38
 -1 -2 9 53.31 5.91
 1 -2 -8 104.72 5.57
 1 2 -8 104.09 6.26
 1 -2 -7 31.97 2.75
 1 2 -7 30.51 3
 1 -2 -6 461.05 9.06
 1 2 -6 457.38 10.41
 1 2 -5 109.6 4.55
 1 -2 -5 106.48 3.8
 1 2 -4 342.07 7.44
 1 -2 -4 333.3 5.96
 -1 2 4 339.52 3.98
 1 -2 -3 226.47 3.35
 -1 -2 3 193.68 4.51
 1 -2 -3 165.99 3.53
 1 -2 -3 218.17 2.75
 -1 2 3 193.15 2.18
 1 -2 -2 121.56 1.67
 1 -2 -2 119.04 1.37
 1 -2 -1 814.8 5.8
 1 -2 -1 824.04 5.39
 1 -2 0 340.95 3.78
 1 2 0 351.74 3.56
 -1 -2 -1 2.48 0.25
 1 -2 1 2.68 0.31
 1 -2 1 1.69 0.28
 1 -2 1 2.28 0.34
 1 2 1 1.23 0.18
 1 2 2 593.06 5.94
 1 -2 2 596.45 4.59
 1 -2 2 587.92 5.94
 -1 2 -3 36.57 1.69
 1 2 3 39.39 1.44
 1 -2 3 33.93 1.45
 1 -2 3 35.34 0.82
 1 2 3 36.88 1.77
 1 -2 3 38.25 1.56
 1 2 4 581.87 6.56
 1 2 4 580.45 8.47
 1 -2 4 556.06 6.3
 -1 2 -4 593.84 7.95
 1 -2 4 571.11 6.47
 1 -2 4 536.76 9.23
 -1 2 -5 46.18 2.4
 1 -2 5 38.88 2.73
 1 2 5 42.44 2.01
 1 2 5 39.68 2.52
 1 2 6 264.49 5.76
 -1 2 -6 290.45 7.02
 1 -2 6 261.97 8.01
 -1 -2 -6 284.11 7.2
 1 2 6 271.99 7.42
 1 2 7 297.81 6.87
 -1 2 -7 282.35 7.57
 -1 -2 -7 277.53 7.66
 -1 2 -8 64.29 4.11
 1 -2 8 59.89 4.71
 -1 -2 -8 58.66 3.84
 1 2 9 129.28 7.3
 1 -2 9 116.11 7.09
 1 -2 10 167.38 8.79
 1 2 10 173.58 8.66
 1 -2 11 86.09 6.98
 1 2 11 85.46 6.5
 1 -2 12 110.46 7.2
 1 -2 13 2.8 0.95
 -1 -3 14 4.95 0.98
 -1 -3 13 138.79 7.37
 -1 -3 12 15.8 2.72
 -1 3 12 15.01 2.5
 -1 3 11 44.33 5
 -1 -3 11 46.26 5.3
 -1 -3 11 36.47 4.68
 -1 3 10 56.84 6.07
 -1 -3 10 48.91 5.71
 -1 -3 10 56.11 6.41
 -1 -3 9 8.2 2.38
 -1 3 9 6 1.96
 1 -3 -8 18.53 2.34
 -1 -3 8 19.8 3.15
 1 3 -8 15.91 2.38
 1 -3 -7 616.83 12.1
 1 3 -7 563.65 13.57
 1 -3 -6 41.93 2.7
 -1 -3 6 50.26 3.46
 1 3 -6 40.6 3.36
 1 3 -5 622.02 12.23
 -1 -3 5 627.36 10.95
 1 -3 -5 611.55 9.46
 -1 -3 4 33.66 2.25
 1 3 -4 35.68 2.68
 -1 3 4 33.71 1.33
 -1 3 4 26.72 0.98
 1 -3 -4 23.13 0.98
 1 -3 -4 32.88 1.83
 -1 3 3 65.53 1.19
 1 -3 -3 57.24 1.69
 1 -3 -3 55.96 0.89
 1 -3 -3 62.22 1.28
 1 3 -3 100.75 4.1
 -1 -3 3 78.58 3.06
 1 -3 -3 78.43 2.35
 -1 3 3 104.53 1.92
 1 -3 -2 5.01 0.52
 1 -3 -2 2.41 0.33
 1 -3 -2 4.19 0.39
 1 3 -2 1.72 0.46
 1 3 -1 279.65 4.61
 1 -3 -1 254.85 2.57
 -1 -3 0 1.67 0.29
 1 -3 0 3.2 0.39
 -1 3 0 2.38 0.31
 1 3 0 4.13 0.45
 1 -3 1 537.39 6.67
 -1 3 -1 523.35 5.66
 1 3 2 331.75 3.52
 1 -3 2 339.44 5.14
 1 -3 2 335.6 4.77
 1 -3 2 344.34 3.96
 1 3 3 444.67 5.77
 1 -3 3 411.17 7.5
 -1 3 -3 475.15 6.1
 1 -3 3 406.41 4.21
 1 3 3 460.23 5
 1 -3 3 415.01 5.99
 1 -3 4 15.95 1.63
 1 3 4 16.49 1.32
 1 -3 4 16.42 1.2
 1 -3 4 17.16 1.23
 1 3 4 16.44 1
 1 -3 5 1444.84 12.49
 1 -3 5 1439.97 17.71
 1 3 5 1545.74 15.39
 -1 3 -5 1580.24 15.26
 1 3 5 1443.48 11.78
 1 3 6 64.61 3.45
 -1 3 -6 55.89 3.07
 1 3 6 54.25 2.45
 1 -3 6 56.33 3.78
 -1 3 -7 241.46 7.37
 1 3 7 211.8 5.61
 1 -3 7 215.97 8.23
 -1 -3 -7 240.26 7.33
 -1 -3 -8 19.36 2.17
 1 -3 8 23.9 3.03
 -1 3 -8 21.08 2.41
 1 -3 9 12.08 2.27
 1 -3 9 15.33 2.71
 1 -3 10 104.18 6.87
 1 3 10 115.73 6.85
 1 -3 11 102.96 7.61
 1 -3 12 0.68 0.31
 1 -3 13 112.89 6.16
 -1 -4 14 17.63 1.8
 -1 -4 13 10.85 2.04
 -1 -4 12 38.44 4.11
 -1 -4 12 46.2 4.55
 -1 -4 11 37.61 4.83
 -1 4 11 33.61 4.12
 -1 -4 11 29.72 4.1
 -1 4 10 44.4 5.22
 -1 -4 10 38.84 5.01
 -1 -4 10 46.81 5.81
 -1 -4 9 261.12 12.96
 -1 -4 9 300.52 14.69
 -1 -4 8 0.8 0.78
 1 4 -8 1.69 0.86
 1 -4 -8 1.49 0.73
 1 -4 -7 600.07 11.89
 1 4 -7 579.2 13.45
 1 -4 -6 58.22 3.24
 1 4 -6 60.32 4.09
 1 4 -5 2.17 0.71
 -1 -4 5 1.14 0.48
 1 -4 -5 0.77 0.35
 1 -4 -4 254.55 5.15
 -1 -4 4 285.27 7.2
 1 4 -4 324.76 8.22
 1 -4 -4 300.91 3.8
 1 -4 -4 241.19 3.89
 -1 4 4 233.43 2.9
 1 -4 -3 47.17 1.81
 -1 4 3 46.04 1.02
 1 -4 -3 47.29 1.32
 1 -4 -2 420.95 4.74
 1 -4 -2 327.51 4.22
 1 4 -2 298.42 6.42
 1 -4 -2 447.51 5.62
 1 -4 -1 89.72 1.45
 1 4 -1 94.14 3.02
 1 -4 0 135.58 2.71
 -1 4 0 138.35 2.8
 1 4 0 159.22 3.33
 -1 -4 0 156.38 3.17
 -1 4 -1 1110.25 9.74
 1 -4 1 1125.76 10.31
 -1 -4 -2 91.24 1.76
 -1 4 -2 98.72 2.66
 1 -4 2 98.39 3.31
 1 -4 2 96.58 3.06
 1 -4 2 96.14 2.5
 1 -4 3 193.21 3.31
 1 4 3 218.19 3.33
 1 -4 3 202.26 4.57
 -1 -4 -3 184.11 2.42
 1 4 3 224.17 3.54
 1 -4 3 202.68 5.37
 -1 4 -3 227.41 4.65
 -1 4 -4 201.02 4.97
 1 -4 4 208.21 6.08
 1 4 4 236.53 4.61
 1 -4 4 205.73 4.82
 1 4 4 236.83 4.1
 1 -4 4 236.71 5.01
 1 -4 5 106.89 4.8
 1 -4 5 115.62 3.69
 -1 4 -5 112.76 4.19
 1 -4 5 110.88 3.65
 1 4 5 102.89 2.92
 -1 4 -6 204.87 6.32
 1 -4 6 211.68 7.5
 1 4 6 197.47 4.6
 1 4 7 113.58 4
 -1 -4 -7 122.94 5.32
 -1 4 -7 132.79 5.87
 1 -4 7 127.91 6.39
 -1 -4 -8 0.64 0.39
 1 -4 8 0.94 0.67
 -1 4 -8 0.77 0.46
 1 -4 9 143.84 7.84
 1 -4 9 183.05 9.27
 1 -4 10 24.25 3.33
 1 -4 10 34.9 4.16
 1 -4 11 231.73 11.32
 1 -4 12 18.66 2.94
 1 -4 13 9.75 1.78
 -1 -5 13 1.35 0.82
 -1 -5 13 1.25 0.53
 -1 -5 12 34.44 3.76
 -1 -5 12 39.69 4.16
 -1 -5 11 -0.32 0.62
 -1 -5 11 -0.38 0.86
 -1 -5 10 102.41 7.88
 -1 -5 10 114.68 9.03
 -1 -5 9 3.12 1.59
 -1 -5 9 1.63 1.03
 1 -5 -8 405.22 10.99
 1 5 -8 432.51 12.58
 1 5 -7 39.93 3.65
 1 -5 -7 30.94 2.67
 1 -5 -6 733.76 11.96
 1 5 -6 865.44 16.12
 -1 -5 5 0.88 0.37
 1 -5 -5 0.77 0.25
 1 -5 -5 0.39 0.25
 1 -5 -4 73.75 2.39
 -1 -5 4 70.86 3.69
 1 5 -4 80.1 4.18
 1 -5 -4 66.29 2.69
 1 -5 -4 76.16 1.63
 -1 5 4 69.19 1.55
 1 -5 -3 312.76 5.29
 1 -5 -3 263.57 4.71
 -1 -5 3 280.08 6.88
 1 5 -3 238.52 6.78
 1 -5 -3 297.5 4.01
 -1 -5 2 379.97 7.02
 1 5 -2 424.29 7.45
 1 5 -2 432.6 7.98
 1 -5 -2 373.75 5.82
 1 -5 -2 412.89 4.87
 -1 -5 1 9.07 0.97
 1 -5 -1 8.8 0.48
 1 5 -1 9.89 1.07
 -1 -5 0 1278.55 10.9
 1 -5 0 1279.83 9.45
 -1 -5 -1 9.91 0.84
 -1 5 -1 8.41 0.87
 1 -5 1 11.52 1.02
 1 -5 1 11.93 1.14
 -1 5 -2 710.4 9.12
 1 -5 2 688.45 7.05
 -1 5 -2 721.54 8.21
 1 -5 2 675.11 9.11
 1 -5 2 672.48 9.29
 -1 -5 -3 130.34 2.54
 1 -5 3 132.95 3.16
 1 -5 3 132.27 4.43
 1 -5 3 134.53 4.08
 1 -5 4 201.35 6.12
 1 5 4 217.03 3.85
 1 -5 4 199.22 5.15
 -1 5 -4 203.99 5.89
 1 -5 5 33.29 2.12
 1 -5 5 30.13 2.6
 1 -5 5 30.34 2.08
 1 5 5 28.94 1.48
 1 -5 6 150.19 6.38
 1 5 6 143.61 3.78
 -1 5 -7 15.1 2.18
 1 -5 7 16.58 2.35
 -1 -5 -7 15.03 1.9
 -1 -5 -8 172.71 6.73
 1 -5 8 182.53 8.82
 1 -5 9 0.89 0.59
 1 -5 9 0.58 0.53
 1 -5 10 429.77 14.74
 1 -5 10 448.52 15.96
 1 -5 11 3.21 1.12
 1 -5 11 3.46 1.39
 1 -5 12 56.31 4.99
 1 -5 13 5.58 1.32
 -1 -6 13 0.54 0.58
 -1 -6 13 0.49 0.29
 -1 -6 12 33.28 3.77
 -1 -6 11 15.72 2.78
 -1 -6 11 21.05 3.52
 -1 -6 10 14.14 3.14
 -1 -6 10 10.15 2.39
 -1 -6 9 148.16 9.26
 -1 -6 9 175.11 11.25
 1 -6 -8 0.53 0.35
 1 6 -8 1.79 0.9
 1 6 -7 226.5 8.35
 -1 -6 7 241.48 10.29
 1 -6 -6 270.15 7.23
 1 6 -6 306.74 9.34
 1 -6 -5 1.31 0.47
 1 6 -5 0.74 0.5
 1 -6 -4 195.55 4.51
 -1 -6 4 212.29 6.9
 1 -6 -4 191.73 3.05
 1 -6 -4 218.91 5.01
 1 6 -4 236.27 7.57
 1 -6 -3 437.63 6.97
 -1 -6 3 464.83 9.13
 1 -6 -3 438.88 5.72
 1 6 -3 406.93 8.75
 1 6 -3 497.02 10.04
 1 -6 -3 506.75 6.66
 1 -6 -2 21.86 1.1
 -1 -6 2 22.6 1.82
 -1 -6 1 1082.04 12
 1 -6 -1 1181.65 11.86
 1 6 -1 1151.06 12.95
 1 -6 -1 1119.15 6.5
 1 6 0 92.87 3.22
 -1 -6 0 97.94 1.86
 1 -6 0 97.91 2.49
 1 -6 0 112.46 3.73
 -1 -6 0 83.38 2.87
 -1 6 0 77.97 2.65
 -1 6 -1 863.27 9.96
 1 -6 1 957.09 10.03
 -1 -6 -1 898.99 9.16
 1 -6 1 987.82 11.6
 -1 -6 -2 329.83 5.63
 -1 6 -2 331.28 6.69
 1 -6 2 352.08 4.98
 1 -6 2 331.88 6.78
 1 -6 2 344.33 6.78
 -1 6 -3 345.16 7.37
 1 -6 3 342.2 7.43
 1 -6 3 345.57 7.1
 1 -6 4 1189.21 15.52
 -1 6 -4 1187.46 15.94
 1 6 4 1173.84 9.61
 1 -6 4 1192.63 13.98
 1 -6 5 29.8 2.63
 1 -6 5 37.96 2.45
 1 6 5 35.18 1.73
 1 -6 5 32.74 2.34
 1 6 6 122.46 3.53
 1 -6 6 124.54 5.98
 1 -6 7 120.23 6.59
 -1 -6 -7 106.89 5.14
 1 -6 8 7.52 1.67
 1 -6 8 8.11 1.92
 1 -6 9 116.72 6.87
 1 -6 9 144.17 8.52
 1 -6 10 15.25 2.94
 1 -6 10 20.54 3.27
 1 -6 11 36.7 4.33
 1 -6 11 34.57 3.94
 1 -6 12 71.78 4.86
 1 -6 12 81.51 5.79
 1 -6 13 0.31 0.28
 -1 -7 13 57.68 3.91
 -1 -7 13 54.61 3.46
 -1 -7 12 4.56 1.47
 -1 -7 12 4.43 1.29
 -1 -7 11 59.01 5.85
 -1 -7 11 47.16 4.53
 -1 -7 10 7.81 2.39
 -1 -7 10 4.32 1.48
 -1 -7 9 24.63 4.19
 -1 -7 9 21.89 3.47
 -1 -7 8 3.84 1.77
 -1 -7 8 3.65 1.25
 1 7 -7 297.19 9.78
 -1 -7 7 269.74 11.17
 1 7 -6 1.31 0.72
 -1 -7 6 1.21 0.71
 1 -7 -6 0.47 0.4
 1 -7 -5 774.18 9.32
 1 -7 -5 767.19 10.87
 1 -7 -4 9.61 1.04
 1 7 -4 5.3 1.1
 1 7 -4 9.02 1.57
 1 -7 -3 607.98 7.41
 1 -7 -3 593.99 8.72
 -1 -7 3 580.38 11.04
 1 -7 -3 585.21 7.23
 1 7 -2 602.46 10.97
 1 -7 -2 570.71 8.69
 1 7 -1 362.91 7.43
 -1 -7 1 350.65 7.13
 1 -7 -1 365.77 6.96
 1 7 0 453.09 7.75
 1 -7 0 511.84 8.63
 -1 -7 0 442.19 7.42
 -1 7 0 408.86 6.68
 1 -7 0 480.73 5.83
 -1 7 -1 4.62 0.74
 1 -7 1 4.82 0.71
 1 -7 1 4.43 0.84
 -1 -7 -2 56.5 2.46
 1 -7 2 59 2.85
 1 -7 2 60.15 3.04
 1 -7 3 1135.21 14.41
 1 -7 3 1077.02 13.76
 -1 7 -4 13.77 1.7
 1 7 4 13.32 1.03
 1 -7 4 13.64 1.68
 1 -7 4 11.73 1.43
 1 7 5 1053.59 10.29
 -1 7 -5 1084.33 16.78
 1 -7 5 1017.42 14.37
 1 -7 5 1066.47 14.09
 1 -7 5 1011.46 16.26
 1 7 6 5.75 0.79
 1 -7 6 6.21 1.11
 1 -7 6 6.69 1.47
 -1 -7 -7 152.33 6.21
 1 -7 7 147.12 7.46
 1 -7 8 16.83 2.85
 1 -7 8 12.87 2.16
 1 -7 9 2.76 1.29
 1 -7 9 4.07 1.55
 1 -7 10 2.71 1.27
 1 -7 10 1.66 1.02
 1 -7 11 91.69 6.6
 1 -7 11 95.87 6.52
 1 -7 12 1.27 0.66
 1 -7 12 1.19 0.62
 1 -7 13 96.28 4.8
 -1 -8 13 2 0.61
 -1 -8 13 0.57 0.42
 -1 -8 12 76.33 5.35
 -1 -8 12 78.86 5.44
 -1 -8 11 2.4 1.1
 -1 -8 10 36.61 4.13
 -1 -8 10 44.45 5.4
 -1 -8 9 43.46 4.63
 -1 -8 9 47.39 5.74
 -1 -8 8 16.34 2.82
 -1 -8 8 16.84 3.37
 1 8 -7 18.02 2.92
 -1 -8 7 64.71 5.49
 -1 -8 6 380.85 11.87
 1 8 -6 137.08 7.62
 -1 -8 5 25.7 2.73
 1 -8 -5 29.21 1.89
 1 8 -5 21.96 2.84
 1 8 -4 797.93 16.1
 -1 -8 4 768.08 13.18
 1 -8 -3 12.23 1.08
 1 -8 -3 10.6 1.23
 1 8 -2 1257.8 16.9
 1 -8 -2 1257.46 14.02
 1 8 -1 561.07 9.93
 1 -8 -1 573.6 9.38
 1 -8 0 18.27 1.72
 1 -8 1 884.63 12.56
 1 -8 1 876.73 9.98
 1 -8 2 314.74 6.83
 -1 8 -2 296.74 7.07
 1 -8 2 305.36 7.37
 -1 -8 -2 292.3 6.08
 -1 8 -3 229.2 6.79
 1 -8 3 208.53 6.23
 1 -8 3 223.32 6.45
 1 8 4 1081.93 10.23
 -1 8 -4 1095.56 16.57
 1 -8 5 14.62 1.81
 1 8 5 17.54 1.29
 -1 8 -5 17.14 2.25
 1 -8 5 16.9 2.15
 -1 8 -6 587.31 14.27
 1 -8 6 591.81 14.15
 1 -8 6 576.04 11.33
 -1 -8 -7 21.07 2.3
 1 -8 8 59.03 5.26
 1 -8 8 58.12 5.32
 1 -8 9 54.62 5.21
 1 -8 9 54.22 5.32
 1 -8 10 52.05 5.07
 1 -8 10 49.79 4.99
 1 -8 11 25.31 3.27
 1 -8 11 25.86 3.39
 1 -8 12 107.11 5.65
 1 -8 12 104.97 5.89
 1 -8 13 0.41 0.29
 -1 -9 12 6.12 1.4
 -1 -9 12 6.96 1.56
 -1 -9 11 47.18 4.63
 -1 -9 11 49.59 4.99
 -1 -9 10 42.68 5.11
 -1 -9 10 34.09 3.68
 -1 -9 9 2.95 1.55
 -1 -9 9 3.33 1.24
 -1 -9 8 474.96 17.71
 -1 -9 7 1.22 0.92
 1 9 -6 54.33 5.11
 -1 -9 6 115.32 6.7
 1 9 -5 98.98 6.37
 1 -9 -5 107.97 3.87
 -1 -9 5 109.73 5.76
 1 -9 -4 7 1.06
 1 9 -4 4.96 1.34
 -1 -9 4 5.02 1.07
 1 -9 -3 143.49 4.06
 1 -9 -3 149.63 4.89
 1 9 -3 144.62 6.54
 1 9 -2 365.88 9.3
 1 -9 -2 363.76 7.82
 1 -9 -1 124.83 4.49
 1 -9 -1 127 4.63
 1 9 -1 113.8 4.87
 1 -9 0 1179.75 14.94
 -1 9 -1 72.01 3.42
 -1 -9 -1 66.77 3.32
 -1 -9 -2 371.97 7.41
 1 -9 2 407.72 7.85
 -1 9 -2 382.93 8.24
 1 -9 2 402.42 9.07
 -1 9 -3 83.57 4.28
 1 -9 3 92.2 4.21
 1 -9 3 92.2 3.72
 1 -9 3 86.87 4.31
 1 9 4 45.79 2.12
 -1 9 -4 51.52 3.67
 1 -9 4 42.76 3.12
 1 -9 4 45.68 3.3
 1 9 5 383.95 6.35
 -1 9 -5 381.49 11.13
 1 -9 5 362.31 9.42
 1 -9 5 390.19 10.75
 -1 9 -6 90.5 5.85
 1 -9 6 85.79 4.57
 1 -9 6 85.83 5.51
 1 -9 7 171.41 8.33
 1 -9 7 160.7 8.59
 1 -9 8 146.49 8.15
 1 -9 8 148.61 8.59
 1 -9 9 3.61 1.42
 1 -9 9 3.29 1.27
 1 -9 10 201.92 9.58
 1 -9 10 201.13 9.89
 1 -9 11 60.46 4.91
 1 -9 11 60.26 4.87
 1 -9 12 10.55 1.68
 1 -9 12 11.82 1.85
 -1 -10 12 0.55 0.46
 -1 -10 12 1 0.42
 -1 -10 11 87.44 6.2
 -1 -10 11 96.18 5.98
 -1 -10 10 0.93 0.44
 -1 -10 10 0.76 0.57
 -1 -10 9 217.01 11.74
 -1 -10 8 4.35 1.77
 -1 -10 7 371.04 14.8
 -1 -10 6 2.46 0.91
 1 -10 -5 84.49 3.64
 1 10 -5 76.13 5.8
 1 10 -4 22.49 2.95
 1 -10 -4 30.38 2.35
 1 -10 -3 280.04 6.01
 1 -10 -3 284.2 7.25
 1 -10 -2 6.02 1.02
 1 10 -2 8.99 1.53
 1 -10 -1 526.46 9.93
 1 10 -1 560.57 11.57
 1 -10 0 27.57 2.34
 -1 -10 0 25.54 2.28
 -1 -10 -1 782.12 12.1
 1 -10 1 820.7 13.32
 -1 10 -1 795.38 12.25
 -1 10 -2 18.16 1.94
 1 -10 2 16.73 1.68
 -1 -10 -2 18.45 1.74
 1 -10 2 17.42 1.98
 -1 10 -3 51.16 3.47
 1 -10 3 46.85 3.34
 1 -10 3 43.93 2.73
 1 -10 4 30.3 2.74
 1 -10 4 28.96 2.71
 -1 10 -4 27.03 2.79
 1 10 4 33.75 1.92
 1 -10 5 12.82 1.93
 1 -10 5 12.37 1.83
 -1 10 -5 12.39 2.04
 1 -10 6 39.95 4.06
 1 -10 7 116.95 7.42
 1 -10 8 0.24 0.48
 1 -10 8 -0.05 0.49
 1 -10 9 648.79 16.92
 1 -10 9 629.9 17.85
 1 -10 10 0.21 0.22
 1 -10 10 0.15 0.55
 1 -10 11 119.95 6.36
 1 -10 11 119.26 6.58
 1 -10 12 0.13 0.27
 1 -10 12 0.38 0.22
 -1 -11 12 11.82 1.66
 -1 -11 11 27.06 3.2
 -1 -11 10 16.81 2.9
 1 -11 -9 24.63 2.45
 -1 -11 9 28.62 4.1
 -1 -11 8 248.54 12.32
 -1 -11 7 169.63 9.86
 1 -11 -6 334.25 10.3
 -1 -11 6 290.33 12.21
 1 11 -5 158.35 8.54
 -1 -11 5 167.76 8.12
 1 -11 -4 4.14 0.91
 1 11 -4 5.46 1.52
 -1 -11 4 4.27 1.21
 1 -11 -3 162.54 5.8
 1 11 -3 160.53 7.18
 -1 -11 3 156.14 7.05
 1 -11 -2 192.88 6.24
 -1 -11 2 203.08 7.56
 1 -11 -1 41.05 2.86
 -1 -11 1 39.52 3.13
 1 -11 0 308.89 7.85
 1 -11 0 323.14 8.48
 -1 -11 -1 92.7 4.38
 1 -11 1 93.88 4.64
 1 -11 1 90.01 4.17
 1 -11 2 147.93 5.36
 -1 11 -2 136.11 5.67
 1 -11 2 140.34 5.85
 1 -11 3 188.9 6.99
 -1 11 -3 193.27 7
 1 -11 3 189.41 6.02
 1 -11 4 9.06 1.58
 1 11 4 11.39 1.18
 -1 11 -4 8.51 1.61
 1 -11 5 185.68 7.4
 -1 -11 -6 352.04 10.66
 1 -11 6 296.3 11.34
 1 -11 7 340.48 12.67
 1 -11 8 181.47 9.39
 1 -11 9 1.58 1.1
 1 -11 10 137.29 7.57
 1 -11 10 145.81 7.15
 1 -11 11 24.16 2.51
 1 -11 11 31.92 3.2
 1 -11 12 20.61 1.99
 -1 -12 11 0.47 0.46
 -1 -12 10 35.61 4
 -1 -12 9 18.9 3.2
 1 -12 -9 14.22 1.78
 -1 -12 8 0.87 0.95
 -1 -12 7 43.74 4.91
 -1 -12 6 252.61 11.24
 1 -12 -6 269.85 9.36
 1 -12 -5 143.34 6.89
 1 -12 -4 276.2 7.77
 1 -12 -3 119.73 5.24
 -1 -12 3 106.7 5.95
 1 12 -3 122.55 6.77
 1 -12 -2 258.34 7.48
 -1 -12 2 256.68 8.75
 1 -12 -1 17.39 1.91
 -1 -12 1 18.25 2.22
 1 -12 0 -0.05 0.33
 -1 -12 0 0.74 0.42
 1 -12 1 105.16 5.21
 1 -12 1 105.51 4.7
 -1 -12 -1 101.46 4.78
 -1 12 -2 147.91 6.18
 1 -12 2 142.02 5.49
 1 -12 2 148.85 6.32
 -1 12 -3 3.8 1.03
 1 -12 3 1.8 0.49
 1 -12 3 2.25 0.85
 1 -12 4 618.98 16.4
 1 -12 5 91.82 5.99
 -1 -12 -5 112.56 6.24
 -1 -12 -6 289.86 9.76
 1 -12 6 260.91 10.64
 1 -12 7 7.02 1.81
 1 -12 8 2.12 1.05
 1 -12 9 0.66 0.73
 1 -12 10 24.07 3
 1 -12 11 1.11 0.49
 1 -12 11 0.27 0.25
 -1 -13 11 47.62 3.37
 -1 -13 10 17.35 2.5
 -1 -13 9 1.96 0.85
 1 -13 -9 0.76 0.21
 1 -13 -8 44.44 3.39
 -1 -13 8 42.37 4.68
 1 -13 -7 24 2.61
 -1 -13 7 23.86 3.49
 1 -13 -6 27.37 2.94
 -1 -13 6 23.95 3.41
 1 -13 -5 813.03 16.61
 1 -13 -4 82.05 5.26
 1 -13 -3 554.96 13.73
 1 -13 -2 21.53 2.01
 -1 -13 1 80.35 4.93
 1 -13 -1 83.43 4.35
 1 -13 0 73.09 4.09
 -1 -13 0 76.89 4.6
 1 -13 1 0.64 0.33
 -1 -13 -1 1.27 0.58
 1 -13 2 14.67 1.81
 1 -13 3 909.95 19.57
 -1 -13 -4 -0.33 0.81
 1 -13 4 0.36 0.39
 1 -13 4 0.44 0.23
 1 -13 5 455.06 14.92
 -1 -13 -5 428.38 12.3
 1 -13 5 410.24 12.72
 1 -13 6 30.45 3.94
 -1 -13 -6 31.67 3.22
 1 -13 6 30.99 3.62
 1 -13 7 214.08 9.71
 1 -13 7 149.48 8.67
 1 -13 8 59.26 5.26
 1 -13 8 86.11 6.12
 1 -13 9 0.66 0.49
 1 -13 9 2.1 1
 1 -13 10 18.12 2.41
 1 -13 10 23.97 2.6
 1 -13 11 25.34 2.32
 -1 -14 10 8.01 1.5
 -1 -14 9 107.23 6.41
 1 -14 -9 130.96 4.91
 1 -14 -8 17.44 2.03
 -1 -14 8 16.62 2.67
 1 -14 -7 160.08 6.64
 -1 -14 7 155.96 8.6
 -1 -14 6 99.82 6.69
 1 -14 -6 101.84 5.65
 1 -14 -5 16.66 2.33
 1 -14 -4 38.15 3.59
 1 -14 -3 323.14 10.56
 1 -14 -2 34.99 3.43
 -1 -14 1 648.57 16.39
 1 -14 -1 601.63 14.41
 1 -14 0 17.35 2.45
 -1 -14 0 18.81 2.73
 -1 -14 -1 589.62 15.53
 1 -14 1 641.43 14.97
 1 -14 2 27.51 3.3
 -1 -14 -2 18.09 2.65
 -1 -14 -3 197.8 8.76
 1 -14 3 234.45 9.96
 1 -14 4 128.66 7.66
 -1 -14 -4 116.95 6.59
 1 -14 5 7.93 1.93
 -1 -14 -5 7.28 1.57
 1 -14 5 8.21 1.73
 1 -14 6 141.93 8.32
 -1 -14 -6 160.29 7.09
 1 -14 6 163.64 8.12
 -1 -14 -7 252.68 8.06
 1 -14 7 260.02 10.32
 1 -14 8 0.8 0.7
 1 -14 8 0.46 0.32
 1 -14 9 181.9 7.91
 1 -14 9 199 7.99
 1 -14 10 9.96 1.42
 1 -14 10 5.82 1.19
 -1 -15 10 76.61 3.82
 1 -15 -9 5.22 0.9
 -1 -15 9 2.79 0.9
 1 -15 -8 166.72 5.98
 -1 -15 8 172.08 7.89
 1 -15 -7 0.79 0.39
 -1 -15 7 -0.07 0.2
 1 -15 -6 40.56 3.47
 1 -15 -5 55.36 4.23
 1 -15 -4 0.63 0.45
 1 -15 -3 19.53 2.62
 1 -15 -2 477.97 12.94
 -1 -15 1 9.32 1.95
 1 -15 -1 9.54 1.84
 -1 -15 0 614.29 16.25
 1 -15 0 619.57 14.98
 1 -15 1 4.31 1.6
 -1 -15 -1 2.71 0.93
 1 -15 1 2.61 1.03
 1 -15 2 106.83 6.7
 -1 -15 -2 79.87 5.68
 -1 -15 -3 54.9 4.63
 1 -15 3 65.16 5.25
 -1 -15 -4 114.58 6.51
 1 -15 4 130.91 7.54
 1 -15 5 33.79 3.86
 -1 -15 -5 29.56 3.13
 1 -15 5 31.94 3.41
 -1 -15 -6 88.65 5.06
 1 -15 6 90.17 5.77
 -1 -15 -7 0.88 0.62
 1 -15 7 1.37 0.75
 1 -15 7 0.26 0.52
 1 -15 8 206.8 8.2
 1 -15 8 219.68 8.52
 1 -15 9 2.76 0.92
 1 -15 9 2.77 0.83
 1 -16 -9 111.35 3.69
 1 -16 -8 -0.47 0.46
 1 -16 -7 40.6 2.98
 1 -16 -7 44.16 3.07
 1 -16 -6 93.66 5
 1 -16 -5 53.97 4.09
 1 -16 -4 333.09 10.48
 1 -16 -3 73.22 4.98
 1 -16 -2 210.17 8.62
 1 -16 -1 559.23 14.26
 -1 -16 1 595.94 16.01
 -1 -16 0 17.19 2.67
 1 -16 0 17.93 2.59
 1 -16 1 260.9 10.05
 -1 -16 -1 232.41 9.84
 1 -16 2 107.98 6.55
 -1 -16 -2 82.36 5.75
 -1 -16 -3 14.71 2.31
 1 -16 3 20.39 2.98
 1 -16 4 229.91 9.74
 -1 -16 -4 201.08 8.47
 -1 -16 -5 1.94 0.78
 1 -16 5 2.82 1.13
 1 -16 6 235.7 8.79
 -1 -16 -6 196.27 7.18
 -1 -16 -7 167.68 5.97
 1 -16 7 188.15 7.65
 1 -16 8 23.06 2.4
 -1 -16 -8 17 1.68
 1 -16 9 155.54 4.93
 1 -17 -8 4.52 0.77
 1 -17 -7 29.38 2.33
 1 -17 -7 29.84 2.28
 1 -17 -6 5.86 1.18
 1 -17 -5 377.02 10.3
 1 -17 -4 122.03 6.15
 1 -17 -3 518.74 13.19
 1 -17 -2 28.38 3.13
 1 -17 -1 188.4 8.25
 -1 -17 1 182.89 8.58
 1 -17 0 72.46 5.18
 -1 -17 0 69.62 5.31
 1 -17 1 23.1 2.93
 -1 -17 -1 21.29 2.9
 -1 -17 -2 87.71 5.81
 -1 -17 -3 448.55 12.77
 1 -17 3 531.48 14.02
 1 -17 4 1.69 1.05
 -1 -17 -4 0.22 0.26
 1 -17 5 380.27 11.59
 -1 -17 -5 416.28 10.83
 1 -17 6 5.19 1.35
 -1 -17 -6 8.24 1.4
 -1 -17 -7 237.79 6.52
 1 -17 7 276.43 8.27
 -1 -17 -8 11.69 1.23
 1 -17 8 18.18 1.7
 1 -18 -7 11.37 1.27
 1 -18 -7 10.97 1.2
 1 -18 -6 42.48 2.83
 1 -18 -6 40.04 2.71
 1 -18 -5 0.37 0.28
 1 -18 -4 241.84 8.19
 1 -18 -3 46.55 3.78
 1 -18 -2 399.8 11.44
 -1 -18 1 29.66 3.3
 1 -18 -1 31.9 3.29
 -1 -18 0 0.65 0.69
 1 -18 0 0.51 0.62
 1 -18 1 109.37 6.19
 -1 -18 -1 104.6 6.19
 -1 -18 -2 146.99 7.14
 -1 -18 -3 29.58 3.07
 -1 -18 -4 273.93 8.86
 -1 -18 -5 0.97 0.55
 -1 -18 -6 309.33 7.88
 -1 -18 -7 0.81 0.41
 1 -19 -6 32.95 2.18
 1 -19 -6 33.54 2.2
 1 -19 -5 20.65 2.01
 1 -19 -5 19.35 1.82
 1 -19 -4 7.27 1.3
 1 -19 -3 72.48 4.34
 1 -19 -2 107.37 5.58
 1 -19 -1 46.85 3.74
 -1 -19 0 241.96 9.04
 1 -19 0 220.07 8.31
 -1 -19 -1 4.7 1.28
 -1 -19 -2 152.11 6.86
 -1 -19 -3 83.69 4.85
 -1 -19 -4 2.07 0.74
 -1 -19 -5 146.38 5.51
 -1 -19 -6 96.47 3.89
 1 -20 -5 25.28 1.87
 1 -20 -5 26.89 1.85
 1 -20 -4 7.49 1.04
 1 -20 -4 7.62 1.17
 1 -20 -3 32.86 2.33
 1 -20 -3 34.56 2.71
 1 -20 -2 1.65 0.57
 1 -20 -2 1.48 0.46
 1 -20 -1 359.27 9.61
 -1 -20 0 3.57 0.92
 1 -20 0 3.25 0.86
 -1 -20 -1 299.41 9.21
 -1 -20 -2 9.04 1.54
 -1 -20 -3 46.67 3.33
 -1 -20 -4 1.06 0.49
 -1 -20 -5 17.73 1.65
 1 -21 -2 89.09 3.9
 1 -21 -1 18.78 1.82
 -1 -21 -1 76.39 3.93
 -1 -21 -2 195.86 6.19
 -2 0 14 1.88 0.61
 -2 0 13 -0.18 0.17
 -2 0 12 1.62 0.9
 -2 0 11 0.23 0.71
 -2 0 10 140.88 10.49
 -2 0 9 -2.22 1.31
 2 0 -8 194.4 8.69
 2 0 -7 0.19 0.17
 2 0 -6 447.91 11.03
 -2 0 6 411.09 9.52
 2 0 -5 0.06 0.12
 -2 0 5 -0.02 0.23
 2 0 -4 254.98 6.72
 -2 0 4 204.65 5.16
 2 0 -3 1.17 0.39
 -2 0 3 0.58 0.28
 2 0 -2 9621.52 44.96
 -2 0 2 9999 39.45
 2 0 -1 0.5 0.14
 2 0 0 1071.61 8.32
 2 0 0 735.13 6.01
 2 0 1 0.26 0.19
 2 0 1 0.02 0.11
 2 0 2 1370.99 7.8
 2 0 2 1395.99 12.24
 2 0 3 0.06 0.07
 2 0 3 0.02 0.12
 2 0 3 0.3 0.18
 2 0 4 2606.03 19.69
 2 0 4 2498.04 21.83
 2 0 5 0.37 0.27
 2 0 5 0.02 0.12
 2 0 6 166.04 5.61
 2 0 6 167.54 6.41
 2 0 7 -0.18 0.24
 -2 0 -7 0.36 0.26
 2 0 8 435.46 12.4
 -2 0 -8 344.64 9.4
 2 0 9 0.14 0.45
 2 0 10 513.54 15.9
 2 0 11 -0.04 0.27
 2 0 12 82.34 5.65
 2 0 13 -0.11 0.13
 -2 -1 14 10.54 1.4
 -2 1 13 23.89 2.68
 -2 -1 13 25.27 2.83
 -2 1 12 16.36 2.84
 -2 -1 12 16.53 2.91
 -2 1 11 49.32 5.82
 -2 -1 11 43.06 5.49
 -2 -1 11 45.51 5.56
 -2 -1 10 27.51 4.68
 -2 1 10 27.3 4.65
 -2 1 9 141.68 10.43
 -2 -1 9 132.3 10.05
 -2 -1 9 139.6 10.11
 2 1 -8 45.37 4.01
 2 -1 -8 45.34 4.32
 2 -1 -7 168.75 7.33
 2 1 -7 150.78 6.93
 2 -1 -6 215.81 7.3
 -2 -1 6 211.36 7.17
 2 1 -6 200.15 7.33
 -2 -1 5 391.64 8.86
 2 1 -5 362.06 8.87
 2 -1 -5 379.98 8.59
 -2 1 4 968.85 10.09
 2 1 -4 1138.61 14.41
 -2 -1 4 955.16 12.21
 2 -1 -4 1082.13 13.46
 -2 -1 3 0.99 0.31
 2 -1 -3 1.67 0.49
 -2 1 3 0.85 0.17
 2 -1 -2 2236.87 13.47
 2 -1 -2 2233.28 17.15
 -2 1 2 2241.66 15.24
 2 -1 -1 6.57 0.4
 2 -1 -1 8.43 0.78
 2 1 0 485.22 5.98
 2 -1 0 317.62 4.11
 2 1 1 60.21 1.71
 2 -1 1 60.7 2.02
 2 -1 2 1054.98 11.13
 2 -1 2 1083.06 7.06
 2 -1 2 983.73 10.36
 2 -1 2 1064.74 10.3
 2 1 2 1003.57 9.63
 2 -1 3 968.78 12.21
 2 -1 3 1027.25 11.42
 2 1 3 1006.68 9.79
 2 -1 3 976.92 6.57
 2 1 3 936.15 10.82
 2 1 4 660.24 10.18
 2 1 4 695.82 9.01
 2 -1 4 673.12 11.17
 2 -1 4 705.4 10.24
 2 -1 5 73.34 3.99
 2 1 5 75.98 3.24
 2 1 5 69.56 3.64
 2 -1 5 78.69 3.7
 2 1 6 200.37 5.95
 2 -1 6 190.61 7.01
 2 1 6 197.84 6.79
 2 1 7 342.96 8.44
 -2 1 -7 307.49 7.94
 2 1 7 373.94 10.23
 -2 -1 -7 328.39 8.66
 2 -1 7 358.59 10.55
 2 -1 8 2.91 1.06
 -2 1 -8 3.31 0.93
 -2 -1 -8 3.26 0.85
 2 1 9 199.94 9.54
 2 -1 9 203.85 9.86
 2 -1 10 18.2 3
 2 1 10 19.4 3.03
 2 -1 11 130.4 7.9
 2 1 11 132.32 7.71
 2 1 12 20.96 2.76
 2 -1 12 22.64 3.02
 2 -1 13 4.19 1.03
 -2 -2 14 0.26 0.25
 -2 2 13 98.95 5.2
 -2 -2 13 105.72 5.72
 -2 -2 12 5.63 1.67
 -2 -2 12 6.1 1.65
 -2 2 12 5.56 1.64
 -2 2 11 94.86 7.92
 -2 -2 11 91.82 7.91
 -2 -2 11 97.12 8.14
 -2 2 10 24.69 4.35
 -2 -2 10 25.67 4.5
 -2 -2 9 1.49 1.07
 -2 2 9 1.25 0.66
 2 2 -8 17.16 2.46
 2 -2 -8 19.79 2.87
 2 -2 -7 72.19 4.7
 2 2 -7 70.3 4.61
 -2 -2 6 42.56 3.41
 2 2 -6 37.34 3.08
 2 -2 -6 41.1 3.08
 2 -2 -5 1016.91 13.8
 -2 -2 5 1016.76 15.06
 2 2 -5 1025.33 15.01
 2 -2 -4 38.73 2.35
 -2 2 4 41.39 1.82
 -2 2 3 685.82 6.58
 -2 -2 3 504.87 8.67
 2 -2 -3 516.87 8.25
 2 2 -3 643.98 10.29
 2 -2 -3 587.24 6.65
 2 -2 -2 576.11 4.6
 2 -2 -2 504.42 7.21
 2 2 -1 605.8 6.55
 2 -2 -1 538.86 6.05
 2 2 0 103.71 2.71
 -2 -2 0 74.07 2.17
 -2 -2 -1 101.1 2.49
 2 -2 1 100.63 2.24
 -2 2 -1 103.88 2.02
 2 -2 1 102.76 2.97
 2 2 2 222.5 3.91
 2 -2 2 254 3.96
 -2 -2 -2 234.94 4.08
 2 -2 2 224.13 4.74
 2 -2 2 234.27 5.1
 2 -2 2 245.39 3.76
 2 -2 3 1286.93 13.69
 2 -2 3 1258.59 14.45
 2 2 3 1208.16 11.47
 2 -2 3 1279.47 10.02
 2 -2 3 1206.23 9.1
 2 2 3 1266.07 10.53
 2 -2 4 142.85 5.26
 2 -2 4 139.02 2.85
 2 2 4 145.04 3.83
 2 2 4 136.06 4.29
 2 -2 5 1390.23 18.14
 2 2 5 1428.89 16.25
 -2 2 -5 1383.77 15.01
 2 2 6 117.18 4.98
 2 2 6 113.85 4.27
 2 -2 6 113.84 5.54
 2 2 7 259.66 7.1
 -2 2 -7 267.03 7.66
 -2 -2 -7 266.78 7.94
 2 -2 7 281.44 9.53
 2 -2 8 111.57 6.54
 -2 -2 -8 96.55 5.04
 -2 2 -8 101.65 5.09
 2 -2 9 81.38 6.24
 2 2 9 88.15 6.2
 2 -2 10 209.39 10.3
 2 2 10 215.55 9.86
 2 -2 11 103.76 7.06
 2 -2 12 39.28 4.02
 2 -2 13 79.73 4.73
 -2 -3 14 67.9 3.53
 -2 -3 13 3.11 0.94
 -2 3 13 2.02 0.66
 -2 -3 12 53.4 5.08
 -2 3 12 55.37 4.88
 -2 -3 12 64.23 5.5
 -2 -3 11 11.44 2.87
 -2 -3 11 10.53 2.63
 -2 3 11 11.65 2.69
 -2 -3 10 56.36 6.54
 -2 3 10 69.26 7.31
 -2 3 9 49.86 6.17
 -2 -3 9 49.14 6.12
 2 3 -8 37.79 3.67
 2 -3 -8 40.26 4
 -2 -3 7 65.38 4.92
 2 -3 -7 61.35 4.28
 2 3 -7 65.72 4.53
 2 3 -6 497.28 11.62
 2 -3 -6 472.92 10.46
 -2 -3 6 461.09 11.97
 -2 -3 5 24.84 2.51
 2 -3 -5 27.29 2.16
 2 3 -5 31.18 2.73
 -2 -3 4 1117.7 15.35
 -2 3 4 1064.18 8.85
 -2 3 3 116.76 3.45
 2 -3 -3 130.19 3.78
 2 -3 -3 156.39 2.49
 2 3 -3 165.87 5.42
 2 -3 -2 245.06 3.67
 2 -3 -2 243.35 3.12
 2 -3 -1 425.61 4.49
 2 3 -1 416.49 4.89
 2 -3 0 10.9 0.78
 2 -3 0 9.53 0.73
 -2 -3 -1 334.11 4.61
 -2 3 -1 304.7 4.22
 2 -3 1 364.29 4.45
 2 -3 1 325.38 5.67
 2 -3 1 341.51 4.79
 2 -3 2 578.63 7.89
 2 -3 2 638.44 5.77
 2 3 2 583.26 6.53
 -2 -3 -2 666.1 6
 2 -3 2 628.16 6.99
 2 -3 2 626.59 9.19
 2 3 2 620.35 6.22
 2 3 3 37.71 1.74
 2 -3 3 45.92 1.93
 2 -3 3 42.98 2.68
 2 3 3 44.09 1.87
 2 3 4 3539.34 22.75
 2 -3 4 3598.15 28.91
 -2 3 -4 3472.26 22.75
 2 -3 4 3597.32 20.92
 2 3 4 3492.22 20.83
 2 -3 4 3482.55 19.65
 2 3 5 24.04 1.91
 2 -3 5 20.58 2.21
 -2 3 -5 26.14 1.9
 2 3 5 21.74 1.59
 2 -3 6 526.52 12.25
 2 3 6 531.58 9.03
 -2 3 -6 527.23 9.88
 2 3 7 4.2 0.88
 2 -3 7 3.85 1.21
 -2 -3 -7 3.73 0.95
 -2 3 -7 4.8 1.01
 2 -3 8 65.51 5.1
 -2 3 -8 71.8 4.47
 2 3 8 64.52 3.74
 -2 -3 -8 64.68 4.19
 2 -3 9 235.42 10.68
 2 -3 10 11.07 2.38
 2 -3 11 0.24 0.3
 2 -3 12 119.4 6.97
 2 -3 13 -0.29 0.57
 -2 -4 14 1.49 0.54
 -2 -4 13 19.07 2.29
 -2 -4 13 22.81 2.41
 -2 -4 12 4.45 1.53
 -2 4 12 4.57 1.33
 -2 -4 12 4.25 1.4
 -2 -4 11 27.6 4.14
 -2 -4 11 28.9 4.5
 -2 4 11 26.76 3.94
 -2 -4 10 71.73 7.31
 -2 4 10 80.64 7.59
 -2 -4 9 48.87 6.06
 -2 4 9 55.56 6.44
 2 4 -8 526.73 13.22
 2 -4 -8 536.39 14.48
 2 4 -7 0.91 0.69
 2 -4 -7 1.75 0.8
 -2 -4 7 1.72 1.03
 2 -4 -6 113.22 4.99
 2 4 -6 118.94 5.55
 -2 -4 6 126.53 6.79
 2 4 -5 274.69 7.98
 -2 -4 5 268.39 8.54
 2 -4 -4 52.21 2.01
 -2 -4 4 61.56 3.65
 2 4 -4 64.51 3.63
 -2 4 4 64.39 1.94
 2 -4 -4 49.91 2.48
 2 4 -3 55.59 3.32
 2 -4 -3 46.71 2.14
 2 -4 -3 52.89 1.43
 2 -4 -3 53.53 1.84
 -2 -4 3 57.34 3.27
 2 4 -2 68.17 3.1
 2 4 -2 74.57 1.76
 2 -4 -2 75.29 1.99
 2 -4 -2 76.12 1.88
 -2 -4 2 70.94 3.12
 2 -4 -1 857.17 8.25
 2 -4 -1 851.79 7.66
 -2 -4 0 129.84 3.54
 2 4 0 123.48 3.17
 2 -4 0 120.11 3.06
 2 -4 0 130.06 3.03
 2 -4 0 129.61 2.97
 -2 -4 -1 143.37 3.4
 -2 4 -1 124.88 1.82
 -2 4 -1 129.68 3.03
 2 -4 1 178.33 3.41
 2 -4 1 166.25 3.62
 2 -4 1 154.39 4.01
 -2 4 -2 882.49 7.3
 2 -4 2 874.24 7.87
 2 -4 2 866.32 11.26
 -2 4 -2 795.75 8.74
 -2 -4 -2 898.72 7.67
 2 -4 2 856.56 9.03
 2 -4 2 807.84 9.52
 2 4 3 635.69 7.28
 2 -4 3 639.91 10.77
 2 -4 3 656.17 8.29
 2 4 3 635.26 6.49
 2 -4 4 22.29 1.55
 2 4 4 21.72 1.44
 2 -4 4 18.32 1.97
 2 -4 5 76.48 2.98
 2 -4 5 78.44 4.44
 2 4 5 80.25 3.05
 -2 4 -6 113.56 4.57
 2 4 6 111.43 3.98
 2 -4 6 112.59 5.74
 2 -4 7 1.16 0.57
 2 4 7 0.49 0.22
 2 -4 8 144.43 7.96
 2 4 8 117.55 5.02
 2 -4 9 8.72 2.02
 2 -4 9 6.01 1.57
 2 -4 10 360.79 13.47
 2 -4 11 1.3 0.95
 2 -4 12 63.92 5.04
 2 -4 13 37.3 3.17
 -2 -5 13 1.42 0.75
 -2 -5 13 1.69 0.83
 -2 -5 12 0.03 0.4
 -2 -5 12 -0.1 0.16
 -2 -5 11 49.38 5.33
 -2 -5 11 60.99 6.36
 -2 -5 10 1.64 1.17
 -2 -5 10 0.43 0.83
 -2 -5 9 174.22 11.25
 2 -5 -8 0.81 0.62
 2 5 -8 0.29 0.41
 2 -5 -7 965.28 16.97
 -2 -5 7 924.31 20.37
 2 5 -7 948.16 16.87
 2 5 -6 0.75 0.53
 -2 -5 6 0.63 0.57
 2 -5 -6 0.45 0.38
 -2 -5 5 24.15 2.74
 2 5 -5 25.54 2.56
 2 -5 -5 21.79 1.84
 2 -5 -4 4.02 0.7
 -2 -5 4 5.15 1.14
 2 -5 -4 4.88 0.49
 2 5 -4 5.06 1.11
 2 -5 -4 4.91 0.63
 2 -5 -3 500.15 6.97
 2 -5 -3 495.41 6.64
 2 -5 -3 502.74 4.86
 2 -5 -2 81.84 2.36
 2 -5 -2 82.29 2.41
 2 -5 -2 87.78 2.38
 -2 -5 2 92.2 4.02
 2 5 -2 89.44 3.96
 2 -5 -2 81.6 2.64
 2 -5 -1 103.97 3.05
 -2 -5 1 131.55 4.17
 2 5 -1 141.12 4.34
 2 -5 -1 102.63 2.95
 2 -5 -1 109.34 2.91
 2 -5 0 36.44 1.76
 -2 -5 0 24.66 1.61
 2 5 0 26.84 1.67
 2 -5 0 28.21 1.54
 2 -5 0 33.24 1.67
 2 -5 1 887.6 8.99
 -2 -5 -1 875.94 8.88
 2 -5 1 868.63 10.11
 2 -5 1 871.89 9.3
 2 -5 2 14.46 1.46
 -2 -5 -2 20.38 1.16
 2 -5 2 11.36 0.94
 -2 5 -2 18.48 1.41
 2 -5 2 15 1.28
 2 -5 2 13.29 1.16
 2 -5 3 86.51 3.96
 2 5 3 86.01 2.73
 2 -5 3 92.14 3.23
 2 -5 4 81.22 3.19
 2 5 4 83.94 2.87
 2 -5 4 78.5 4.16
 2 -5 5 79.89 4.57
 2 5 5 88.34 3.22
 2 -5 5 81.47 3.31
 2 -5 6 0.09 0.38
 2 5 6 0.43 0.27
 2 -5 7 201.95 8.56
 2 5 7 186.61 5.61
 2 -5 8 17.1 2.73
 2 -5 8 15.38 2.52
 2 -5 9 512.65 15.82
 2 -5 9 535.57 15.47
 2 -5 10 20.07 2.92
 2 -5 10 16.87 2.9
 2 -5 11 225.98 10.24
 2 -5 12 13.72 2.3
 2 -5 13 0.28 0.14
 -2 -6 13 39.64 3.34
 -2 -6 13 34.71 2.88
 -2 -6 12 2.68 1
 -2 -6 12 2.89 1.12
 -2 -6 11 19.14 3.57
 -2 -6 11 18.97 3.13
 -2 -6 10 89.91 7.58
 -2 -6 10 99.52 8.97
 -2 -6 9 25.12 4.22
 -2 -6 8 371.87 15.75
 2 6 -7 89.54 5.39
 2 -6 -6 69.97 3.88
 2 6 -6 81.07 4.97
 -2 -6 6 81.72 5.8
 2 -6 -5 490.68 6.85
 2 -6 -5 481.18 8.82
 -2 -6 5 576.75 14.3
 2 6 -5 611.43 13.14
 2 -6 -4 168.27 4.43
 2 -6 -4 162.55 2.92
 2 6 -3 69.23 4.16
 -2 -6 3 70.7 4
 2 -6 -3 62.21 2.02
 2 -6 -3 72.18 2.11
 2 -6 -3 70.85 2.73
 -2 -6 2 314.62 7.78
 2 -6 -2 293.96 5.22
 2 -6 -2 308.94 5.12
 2 -6 -2 304.34 5.85
 2 -6 -1 57.62 2.43
 2 -6 -1 56.27 2.45
 -2 -6 1 69.89 3.24
 2 6 -1 71.95 3.29
 2 -6 0 1178.72 11.56
 -2 -6 0 1168.16 12.44
 2 -6 1 15.14 1.33
 -2 6 -1 16.06 1.22
 -2 -6 -1 17.83 1.34
 2 -6 2 553.96 9.29
 2 -6 2 556.83 7.45
 -2 6 -2 550 8.42
 2 -6 2 535.83 8.02
 2 -6 2 542.1 7.96
 2 -6 3 1720.9 13.25
 2 6 3 1719.22 14.07
 2 -6 3 1677.95 15.53
 2 -6 3 1666.83 18.5
 2 6 4 17.73 1.34
 -2 6 -4 21.65 1.94
 2 -6 4 18.27 1.63
 2 -6 4 18.31 2.06
 2 6 5 433.41 7.14
 2 -6 5 418.8 10.68
 2 -6 5 430.7 8.23
 2 -6 6 37.76 3.48
 2 -6 6 40.06 2.59
 2 6 6 36.03 2.23
 2 -6 7 53.02 4.45
 2 6 7 55.19 3.08
 2 -6 8 138.09 7.84
 2 -6 8 136.78 7.67
 2 -6 9 10.21 2.24
 2 -6 9 10.09 2.12
 2 -6 10 137.76 8.13
 2 -6 10 140.97 7.89
 2 -6 11 86.16 5.69
 2 -6 11 85.16 6.21
 2 -6 12 8.57 1.77
 2 -6 13 69.3 4
 -2 -7 13 0.4 0.35
 -2 -7 13 0.8 0.44
 -2 -7 12 70.18 4.64
 -2 -7 12 86.13 5.91
 -2 -7 11 14.59 2.58
 -2 -7 11 15.3 3.11
 -2 -7 10 16.09 3.02
 -2 -7 10 19.78 3.9
 -2 -7 9 23.63 3.87
 -2 -7 9 27.4 4.82
 -2 -7 8 0.98 1.21
 2 -7 -8 0.51 0.31
 2 7 -7 2.02 0.96
 -2 -7 6 486.27 14.89
 2 7 -6 518.53 13.18
 2 7 -5 5.87 1.32
 -2 -7 5 4.65 1.36
 2 7 -5 2.74 0.98
 2 -7 -5 5.19 0.73
 2 7 -4 628.13 14.63
 2 -7 -4 695.02 6.77
 2 7 -3 214.93 7.78
 2 -7 -3 200.08 4.25
 2 -7 -3 204.11 5.05
 2 -7 -2 585.25 8.93
 -2 -7 2 583.46 11.17
 2 7 -2 613.44 11.86
 2 -7 -2 579.22 7.75
 2 -7 -2 576.72 8.12
 2 -7 -1 968.54 11.26
 2 -7 -1 980.64 11.5
 -2 -7 1 952.08 13.08
 2 7 -1 983.44 13.37
 2 -7 0 798.84 9.99
 2 -7 0 773.43 8.97
 -2 -7 -1 1.86 0.5
 -2 7 -1 0.83 0.32
 2 -7 1 1.67 0.48
 2 -7 1 1.68 0.45
 2 -7 2 280.05 6.69
 2 -7 2 268.5 5.53
 -2 7 -2 272.52 6.19
 2 -7 2 279.53 5.75
 2 -7 3 61.76 2.62
 2 -7 3 56.24 3.33
 -2 7 -3 54.48 3.03
 2 -7 3 56.63 2.87
 -2 7 -4 1365.28 17.33
 2 7 4 1397.56 12.87
 2 -7 4 1400.22 15.55
 2 7 5 126.43 3.99
 2 -7 5 126.58 4.75
 2 -7 5 117.18 5.72
 -2 7 -5 117.35 5.31
 2 7 6 522.33 8.75
 -2 7 -6 509.16 12.21
 2 -7 6 540.13 10.07
 2 -7 6 519.51 13.14
 -2 7 -7 14.73 2.25
 2 7 7 16.32 1.66
 2 -7 8 28.05 3.5
 2 -7 8 27.25 3.47
 2 -7 9 46.92 4.71
 2 -7 9 51.25 4.84
 2 -7 10 11.61 2.32
 2 -7 10 14.1 2.48
 2 -7 11 8.39 1.76
 2 -7 11 9.59 2.03
 2 -7 12 92.04 4.78
 2 -7 12 107.49 5.89
 2 -7 13 2.28 0.69
 -2 -8 13 46.01 2.95
 -2 -8 13 51.53 3.1
 -2 -8 12 1.28 0.66
 -2 -8 12 1.31 0.89
 -2 -8 11 51.9 5.36
 -2 -8 11 41.51 3.99
 -2 -8 10 0.37 0.76
 -2 -8 10 0.8 0.45
 -2 -8 9 1.68 1.05
 -2 -8 9 0.71 0.75
 2 -8 -8 43.73 3.54
 -2 -8 8 53.72 6.67
 2 8 -7 12.45 2.14
 2 8 -6 87.64 6.35
 2 -8 -5 255.71 5.52
 -2 -8 5 321.22 11.58
 -2 -8 4 28.1 3.11
 2 -8 -4 25.8 1.35
 2 -8 -4 28.28 1.99
 2 8 -3 1266.44 20.13
 2 -8 -3 1257.19 14.12
 -2 -8 3 1272.02 19.18
 2 -8 -2 0.97 0.26
 2 -8 -2 1.37 0.43
 -2 -8 2 2.42 0.85
 2 8 -2 1.34 0.62
 2 8 -1 554.44 10.84
 2 -8 -1 574.66 9.27
 -2 -8 0 505.93 9.14
 2 -8 0 571.8 9.13
 2 -8 1 39.62 2.24
 -2 8 -1 43.47 2.46
 2 -8 1 37.57 2.25
 2 -8 2 353.6 7.69
 2 -8 2 342.96 6.66
 2 -8 3 438.35 9.5
 -2 8 -3 440.46 9.17
 2 -8 3 456.25 7.67
 2 -8 3 441.96 8.54
 2 -8 4 17.18 2.05
 -2 8 -4 22.26 2.23
 2 8 4 19.72 1.52
 2 -8 4 15.46 1.65
 2 8 5 714.07 10.06
 2 -8 5 709.07 12.06
 2 -8 6 7.12 1.61
 2 -8 6 8.6 1.35
 2 8 6 7.87 1.12
 2 -8 7 191.52 8.67
 2 -8 7 201.05 9.23
 2 -8 8 16.34 2.69
 2 -8 8 15.42 2.67
 2 -8 9 2.46 1.19
 2 -8 9 1.37 0.85
 2 -8 10 27.18 3.4
 2 -8 10 25.95 3.38
 2 -8 11 100.43 6.25
 2 -8 11 105.49 6.15
 2 -8 12 4.94 1.14
 2 -8 12 4.58 1.01
 -2 -9 12 41.77 3.47
 -2 -9 12 42.67 3.71
 -2 -9 11 8.46 2.05
 -2 -9 10 7.45 2.19
 -2 -9 10 8.27 1.83
 2 -9 -9 98.49 5.08
 -2 -9 9 80.22 7.9
 2 -9 -8 -0.04 0.53
 -2 -9 8 -0.3 0.66
 -2 -9 7 379.84 16.79
 -2 -9 6 14.67 2.66
 2 9 -6 6.16 1.79
 -2 -9 5 66.53 4.94
 2 -9 -5 55.74 2.82
 -2 -9 4 25.73 3.12
 2 9 -4 18.17 2.7
 -2 -9 3 13.93 2.1
 2 -9 -3 10.45 1.32
 2 9 -3 15.5 2.29
 2 -9 -3 9.85 1.08
 -2 -9 2 332.75 9.41
 2 9 -2 315.07 9.08
 2 -9 -2 381.76 8.1
 2 -9 -2 359.81 7.22
 2 9 -1 524.09 11.3
 -2 -9 1 482.8 10.38
 -2 -9 0 114.61 4.58
 2 -9 0 116.09 4.33
 2 -9 1 829.46 11.6
 2 -9 1 822.99 10.66
 2 -9 2 69.19 3.43
 2 -9 2 74.28 3.31
 2 -9 3 167.67 5.96
 2 -9 3 161.43 5.38
 2 -9 3 164.78 4.88
 -2 9 -3 160.7 5.74
 -2 9 -4 118.6 5.36
 2 -9 4 121.82 5.55
 2 -9 4 135.5 5.2
 2 9 4 138.88 4.26
 2 -9 5 1.19 0.49
 2 -9 5 0.14 0.16
 2 9 5 0.48 0.32
 -2 9 -5 1.05 0.56
 2 -9 6 186.84 6.55
 2 9 6 178.86 5.27
 -2 9 -6 193.05 8.19
 2 -9 6 187.34 8.63
 2 -9 7 86.17 5.77
 2 -9 7 87.44 6.13
 2 -9 8 57.66 5.12
 2 -9 8 61.25 5.07
 2 -9 9 226.97 9.91
 2 -9 9 232.87 10.32
 2 -9 10 28.97 3.46
 2 -9 10 28.2 3.41
 2 -9 11 76.08 5.06
 2 -9 11 80.16 5.24
 2 -9 12 8.95 1.44
 -2 -10 12 22.77 2.15
 -2 -10 12 20.44 2.36
 -2 -10 11 0.89 0.51
 -2 -10 11 0.63 0.61
 -2 -10 10 90.66 7.33
 -2 -10 9 1.32 0.46
 2 -10 -9 1.86 0.67
 2 -10 -8 199.49 7.88
 -2 -10 8 234.67 13.26
 -2 -10 7 15.73 3.39
 -2 -10 6 318.8 14.16
 2 -10 -5 60.29 3.09
 2 10 -5 28.6 3.74
 2 10 -4 7.58 1.8
 2 -10 -4 9.01 1.28
 2 -10 -3 0.24 0.18
 2 -10 -3 0.63 0.41
 2 10 -3 0.89 0.52
 2 -10 -2 230.79 6.66
 2 10 -2 241.85 8.69
 2 -10 -2 226.62 6.02
 2 -10 -1 31.79 2.33
 2 -10 -1 34.12 2.51
 2 -10 0 988.16 13.47
 2 -10 1 2.79 0.67
 2 -10 2 281.36 6.89
 -2 10 -2 283.19 7.58
 2 -10 3 11.88 1.39
 -2 10 -3 10.65 1.48
 2 -10 3 11.43 1.49
 2 -10 3 11.51 1.56
 -2 10 -4 80.58 4.57
 2 -10 4 87.24 4.38
 2 10 4 86.37 3.54
 2 -10 4 82.07 4.63
 2 -10 5 17.38 2.03
 2 10 5 17.3 1.61
 -2 10 -5 12.68 1.96
 2 -10 5 13.4 2.05
 2 -10 6 5.22 1.39
 2 -10 7 0.71 0.75
 2 -10 7 0.27 0.34
 2 -10 8 772.81 17.76
 2 -10 8 755.92 18.58
 2 -10 9 0.74 0.59
 2 -10 9 0.56 0.62
 2 -10 10 387.51 11.96
 2 -10 10 382.11 12.32
 2 -10 11 0.26 0.28
 2 -10 11 0.29 0.23
 2 -10 12 38.05 2.76
 -2 -11 12 67.71 3.78
 -2 -11 11 3.03 1.14
 -2 -11 10 0.02 0.59
 2 -11 -10 1.07 0.6
 2 -11 -9 196.97 7.03
 -2 -11 9 142.38 9.48
 -2 -11 8 66.44 6.72
 2 -11 -8 64.64 4.45
 -2 -11 7 187.97 11.26
 2 -11 -6 248.82 9.3
 -2 -11 6 225.81 11.65
 2 -11 -5 27.94 3.06
 2 -11 -4 243.48 7
 2 11 -4 191.56 9.17
 2 11 -3 12.51 2.23
 2 -11 -3 11.02 1.24
 2 -11 -3 11.37 1.55
 2 -11 -2 61.38 3.58
 2 -11 -2 63.97 3.34
 2 -11 -2 67.09 3.32
 2 -11 -1 501.36 9.98
 2 -11 -1 490.81 10.11
 2 -11 0 24.96 2.2
 2 -11 1 354.73 8.25
 -2 -11 -1 341.01 8.78
 2 -11 2 100.25 4.33
 -2 11 -2 99.17 4.68
 -2 11 -3 43.24 3.24
 2 -11 3 39.93 2.95
 2 11 4 174.9 5.32
 2 -11 4 165.59 6.27
 2 -11 5 84.19 5.64
 2 -11 6 618.24 16.01
 2 -11 7 118.7 7.22
 2 -11 8 69.22 5.55
 2 -11 9 368.33 11.57
 2 -11 9 348.7 12.07
 2 -11 10 16.12 2.22
 2 -11 10 18.09 2.6
 2 -11 11 86.11 4.47
 2 -11 11 99.99 5.18
 -2 -12 11 118.48 5.89
 2 -12 -10 9.28 1.3
 -2 -12 10 4.74 1.43
 -2 -12 9 7.39 1.96
 2 -12 -9 13.8 1.78
 -2 -12 8 54.65 5.8
 2 -12 -8 52.67 3.91
 -2 -12 7 61.7 6.19
 2 -12 -6 61.08 4.62
 -2 -12 6 53.61 5.52
 2 -12 -5 141.91 7.07
 2 -12 -4 20.23 2.61
 2 12 -3 520.74 15.22
 2 -12 -3 491.67 10.42
 2 -12 -2 4.61 0.87
 2 -12 -2 4.46 1.01
 2 -12 -1 18.76 2.02
 -2 -12 1 16.92 2.31
 2 -12 -1 19.8 1.96
 2 -12 0 159.28 5.86
 -2 -12 0 138.92 6.26
 2 -12 1 19.12 2.01
 -2 -12 -1 18.83 2.15
 2 -12 2 15.48 1.78
 2 -12 2 13.28 1.67
 -2 12 -3 282.02 8.59
 2 -12 4 63.48 5.12
 2 -12 4 52.96 4.32
 2 -12 5 505.72 14
 -2 -12 -6 28.89 3.08
 2 -12 6 29 3.45
 2 -12 7 57.09 4.9
 2 -12 8 7.49 1.77
 2 -12 9 1.15 0.75
 2 -12 10 17.05 2.43
 2 -12 10 19.69 2.49
 2 -12 11 75.29 4.06
 -2 -13 11 11.18 1.54
 2 -13 -10 13.22 1.47
 -2 -13 10 11.42 2.02
 2 -13 -9 10.14 1.44
 -2 -13 9 5.28 1.45
 -2 -13 8 2.03 1.01
 2 -13 -8 2 0.75
 2 -13 -7 31.01 3.04
 2 -13 -7 27.31 2.88
 -2 -13 7 29.39 4.03
 2 -13 -6 274.44 9.66
 2 -13 -5 205.29 8.58
 2 -13 -4 622.17 14.89
 2 -13 -3 9.09 1.78
 2 -13 -2 355.73 10.84
 2 -13 -1 150.37 5.57
 2 -13 0 33.82 3.29
 -2 -13 0 19.87 2.44
 2 -13 1 1.82 0.79
 2 -13 2 402.72 11.96
 2 -13 3 5.98 1.42
 2 -13 3 2.98 0.88
 2 -13 4 505.14 14.98
 2 -13 4 440.07 12.62
 2 -13 5 39 4.25
 2 -13 5 34.52 3.63
 -2 -13 -6 267.82 9.5
 2 -13 6 297.56 12.18
 2 -13 6 276.6 10.54
 2 -13 7 103.17 7.13
 2 -13 7 97.15 6.27
 2 -13 8 18.8 2.88
 2 -13 8 25.39 3.14
 2 -13 9 6.82 1.51
 2 -13 9 17.09 2.44
 2 -13 10 10.2 1.68
 2 -14 -10 104.62 3.66
 -2 -14 10 101.88 5.05
 2 -14 -9 0.37 0.36
 -2 -14 9 0.33 0.59
 2 -14 -8 86.58 4.58
 -2 -14 8 80.47 5.98
 2 -14 -7 58.97 4
 2 -14 -7 59.54 4.1
 -2 -14 7 59.64 5.31
 2 -14 -6 173.05 7.47
 2 -14 -5 9.57 1.78
 2 -14 -4 21.75 2.77
 2 -14 -3 112.17 6.28
 2 -14 -2 516.75 13.42
 2 -14 -1 72.27 5.01
 2 -14 0 854.59 17.63
 2 -14 0 926.8 17.45
 2 -14 1 33.66 3.49
 2 -14 1 36.03 3.67
 2 -14 2 706.85 16.37
 2 -14 3 73.75 5.39
 2 -14 4 24.1 2.88
 2 -14 4 24.45 3.27
 -2 -14 -5 113.35 6.41
 2 -14 5 106.15 6.23
 2 -14 5 115.97 7.3
 2 -14 6 203.95 8.78
 2 -14 6 224.5 10.41
 -2 -14 -6 201.72 8.06
 -2 -14 -7 2.45 0.84
 2 -14 7 0.61 0.4
 2 -14 7 1.03 0.7
 2 -14 8 217.74 8.67
 2 -14 8 151.04 7.89
 2 -14 9 0.38 0.25
 2 -14 10 108.85 4.68
 2 -15 -9 147.7 4.73
 -2 -15 9 148.13 6.13
 2 -15 -8 0 0.28
 -2 -15 8 0.08 0.2
 2 -15 -7 91.65 4.71
 2 -15 -7 88.9 4.76
 2 -15 -6 13.06 1.99
 2 -15 -5 134.26 6.64
 2 -15 -4 11.1 2
 2 -15 -3 122.04 6.61
 2 -15 -2 4.1 1.25
 -2 -15 1 683.96 18.33
 2 -15 -1 675.22 15.74
 2 -15 0 26.9 3.11
 2 -15 1 287.53 10.45
 2 -15 1 295.56 10.15
 2 -15 2 0.76 0.88
 -2 -15 -3 431.38 13.62
 2 -15 3 490.01 14.1
 2 -15 4 51.62 4.63
 -2 -15 -4 40.76 3.97
 -2 -15 -5 9.08 1.72
 2 -15 5 8.15 1.8
 -2 -15 -6 1.91 0.72
 2 -15 6 2.18 0.91
 2 -15 6 3.05 1.16
 -2 -15 -7 176.45 6.35
 2 -15 7 162.45 8.02
 2 -15 8 7.9 1.58
 2 -15 9 162.59 6.19
 2 -16 -9 4.01 0.74
 2 -16 -8 52.1 2.94
 2 -16 -7 18.84 1.99
 2 -16 -7 21.12 2.06
 2 -16 -6 82.43 4.55
 2 -16 -6 86.89 4.75
 2 -16 -5 125.72 6.17
 2 -16 -4 0.7 0.59
 2 -16 -3 174.63 7.69
 2 -16 -2 285.07 10.11
 -2 -16 1 68.94 5.63
 2 -16 -1 75.54 5.2
 2 -16 0 472.1 13.24
 -2 -16 0 482.44 15.08
 2 -16 1 15.27 2.31
 -2 -16 -1 15.8 2.61
 -2 -16 -2 123.04 7.36
 2 -16 2 143.68 7.26
 -2 -16 -3 65.61 5.16
 2 -16 3 83.55 5.85
 2 -16 4 44.86 4.25
 -2 -16 -4 37.35 3.7
 2 -16 5 232.9 9.55
 -2 -16 -5 197.95 8
 -2 -16 -6 50.05 3.62
 2 -16 6 49.7 4.31
 2 -16 7 77.18 5.01
 -2 -16 -7 87.82 4.18
 2 -16 8 124.22 5.6
 2 -17 -8 3.1 0.65
 2 -17 -7 4.07 0.74
 2 -17 -7 3.22 0.7
 2 -17 -6 86.39 4.31
 2 -17 -6 88.64 4.41
 2 -17 -5 54.66 3.79
 2 -17 -5 53.83 3.55
 2 -17 -4 280.84 9.17
 2 -17 -3 0.3 0.31
 2 -17 -2 295.39 9.96
 -2 -17 1 45.71 4.42
 2 -17 -1 46.48 4.01
 2 -17 0 50.95 4.23
 -2 -17 0 59.56 5.13
 2 -17 1 26.28 3.06
 -2 -17 -1 28.46 3.47
 -2 -17 -2 130.17 7.33
 -2 -17 -3 0.58 0.39
 2 -17 3 2.02 1.32
 2 -17 4 380.08 11.54
 -2 -17 -4 322.46 10.5
 2 -17 5 6.8 1.7
 -2 -17 -5 4.28 1.14
 2 -17 6 397.53 11.12
 -2 -17 -6 381.94 9.32
 2 -17 7 10.2 1.63
 -2 -17 -7 20.97 1.87
 2 -17 8 111.84 4.32
 2 -18 -7 6.05 0.8
 2 -18 -7 7.68 1.02
 2 -18 -6 5.24 0.94
 2 -18 -6 6.11 0.99
 2 -18 -5 43.16 3.1
 2 -18 -5 43.63 2.94
 2 -18 -4 1.68 0.67
 2 -18 -4 1.3 0.45
 2 -18 -3 272.2 8.82
 2 -18 -2 42.92 3.59
 -2 -18 1 62.75 4.86
 2 -18 -1 68.77 4.63
 2 -18 0 115.07 6.07
 -2 -18 0 126.47 7.06
 -2 -18 -1 28.65 3.3
 -2 -18 -2 97.12 6
 -2 -18 -3 145.48 6.99
 -2 -18 -4 1.49 0.68
 -2 -18 -5 363.87 9.4
 -2 -18 -6 3.69 0.82
 2 -19 -6 5.08 0.77
 2 -19 -6 6.66 0.89
 2 -19 -5 5.77 0.95
 2 -19 -5 6.28 0.92
 2 -19 -4 12.95 1.64
 2 -19 -4 11.49 1.4
 2 -19 -3 11.21 1.63
 2 -19 -3 9.83 1.3
 2 -19 -2 67.92 4.17
 2 -19 -1 226.78 7.83
 -2 -19 0 10.04 1.84
 2 -19 0 8.61 1.56
 -2 -19 -1 354.7 10.83
 -2 -19 -2 47.52 3.84
 -2 -19 -3 48.88 3.67
 -2 -19 -4 106.55 5.06
 -2 -19 -5 21.77 2.05
 2 -20 -4 3.41 0.73
 2 -20 -4 3.65 0.65
 2 -20 -3 2.85 0.57
 2 -20 -3 2.57 0.7
 2 -20 -2 130.92 5.13
 2 -20 -1 1.94 0.62
 2 -20 0 399.64 9.02
 -2 -20 0 311.43 9
 -2 -20 -1 11.84 1.76
 -2 -20 -2 151.59 6.19
 -2 -20 -3 4.72 1.03
 -2 -20 -4 7.78 1.19
 -3 0 13 0.36 0.48
 -3 0 12 0.36 0.22
 -3 0 11 42.25 5.24
 -3 0 10 -0.32 0.97
 -3 0 10 0.29 0.36
 -3 0 9 195.87 11.62
 3 0 -8 0.22 0.22
 3 0 -7 237.01 8.51
 -3 0 6 0.7 0.51
 3 0 -6 -0.09 0.33
 -3 0 5 344.15 8.17
 3 0 -5 320.97 8.02
 -3 0 4 1.02 0.45
 3 0 -4 0.8 0.35
 3 0 -3 1505.01 16.04
 -3 0 3 1527.07 13.2
 3 0 -2 0.21 0.07
 -3 0 2 14 1.19
 3 0 -1 1050.04 7.03
 -3 0 1 894.63 10.81
 3 0 0 0.09 0.17
 3 0 0 0.43 0.13
 3 0 1 64.83 3
 3 0 1 63.49 2.46
 3 0 2 0.05 0.08
 3 0 2 0.18 0.22
 3 0 2 0.16 0.16
 3 0 3 1913.1 17.83
 3 0 3 1939.98 17.95
 3 0 4 0.28 0.17
 3 0 4 0.62 0.4
 3 0 5 49.35 3.3
 3 0 5 42.83 3.08
 3 0 6 0.32 0.3
 3 0 6 1.05 0.55
 3 0 7 156.65 6.87
 -3 0 -7 133.68 5.89
 3 0 8 -0.16 0.4
 3 0 9 513.39 15
 3 0 10 -0.31 0.48
 3 0 11 244.26 10
 3 0 12 -0.25 0.51
 -3 1 13 9.95 1.62
 -3 -1 13 10.55 1.73
 -3 -1 12 12.9 2.47
 -3 1 12 12.54 2.4
 -3 -1 12 12.86 2.37
 -3 -1 11 28.22 4.35
 -3 1 11 28.87 4.28
 -3 -1 10 54.18 6.44
 -3 -1 10 61.57 6.66
 -3 1 10 54.46 6.43
 -3 1 9 5.77 2.09
 -3 -1 9 5.15 1.67
 3 1 -8 146.28 6.94
 3 -1 -8 159.48 7.76
 3 -1 -7 8.36 1.61
 3 1 -7 8.27 1.61
 3 1 -6 122.3 5.5
 3 -1 -6 127.73 5.59
 -3 -1 6 128.84 6.05
 3 -1 -5 583.53 10.91
 3 1 -5 565.08 10.69
 -3 -1 5 571.42 11.19
 -3 1 5 566.02 9.37
 -3 -1 4 0.99 0.38
 -3 1 4 1.8 0.49
 3 -1 -4 0.82 0.37
 3 1 -4 2.25 0.67
 -3 -1 3 2275.5 18.01
 -3 1 3 2300.31 15.22
 3 -1 -3 2420.99 20.13
 3 1 -3 2396.38 21.43
 -3 -1 2 10.39 0.99
 3 -1 -2 10.2 1.13
 3 1 -1 107.07 2.12
 3 -1 -1 112.19 2.28
 3 -1 0 68.2 2.01
 3 1 0 70.56 1.96
 3 1 0 65.7 2.82
 3 -1 1 54.65 1.56
 3 -1 1 25.42 1.58
 3 1 1 41.98 2.37
 3 -1 1 40.75 2.31
 3 1 1 30.76 1.53
 3 -1 1 42.35 2.11
 3 -1 2 268.74 5.87
 3 -1 2 289.71 3.75
 3 -1 2 173.24 4.79
 3 1 2 198.12 4.62
 3 -1 2 261.6 6.18
 3 1 2 266.07 5.24
 3 -1 3 314.38 7.25
 3 1 3 298.13 6.34
 3 1 3 288.97 6.09
 3 -1 3 307.18 7.29
 3 1 4 486.65 9.16
 3 1 4 520.94 9.29
 3 -1 4 500.44 10.14
 3 -1 5 294.79 8.31
 3 -1 5 340.48 9.15
 3 1 5 326.17 8.06
 3 1 5 297.51 7.84
 3 -1 6 84.08 4.77
 3 1 6 94.98 4.78
 -3 1 -6 77.12 4.02
 3 1 6 87.93 4.62
 3 -1 7 26.73 2.89
 -3 1 -7 30.56 2.73
 -3 -1 -7 28.67 2.71
 3 1 7 31.54 2.91
 3 -1 8 107.63 6.64
 3 1 8 112.26 6.63
 3 1 9 2.88 1.07
 3 -1 9 3.21 1.13
 3 1 10 250.13 10.36
 3 -1 10 247.06 10.57
 3 -1 11 13.94 2.39
 3 1 11 14.56 2.4
 3 -1 12 72 4.87
 3 -1 13 27.31 2.34
 -3 2 13 1.39 0.54
 -3 -2 13 0.73 0.47
 -3 -2 12 109.89 7.1
 -3 2 12 110.28 6.95
 -3 -2 12 116.88 7.2
 -3 2 11 9.33 2.52
 -3 -2 11 9.29 2.5
 -3 2 10 33 5.09
 -3 -2 10 32.62 5.02
 -3 -2 9 10.32 2.64
 3 2 -8 22.97 2.73
 3 -2 -8 16.61 2.5
 3 -2 -7 19.85 2.42
 3 2 -7 19.51 2.33
 -3 -2 6 147.72 6.83
 3 2 -6 162.33 6.25
 3 -2 -6 149.05 5.91
 -3 -2 5 1.36 0.65
 -3 2 5 1.26 0.37
 3 2 -5 2.22 0.68
 3 -2 -5 1.42 0.57
 -3 -2 4 920.36 14.07
 -3 2 4 958.39 9.63
 3 -2 -4 932.67 12.19
 -3 -2 3 102.21 3.94
 -3 2 3 106.89 2.83
 3 -2 -3 107.89 3.71
 3 -2 -2 1439.65 13.83
 3 -2 -2 1434.41 11.6
 3 2 -1 423.88 5.33
 3 -2 -1 437.12 4.51
 3 2 -1 445.33 7.57
 -3 -2 1 436.56 6.84
 3 -2 0 62.29 2.31
 3 -2 0 60.52 1.62
 3 2 0 66.62 2.02
 3 2 0 66.44 2.88
 3 -2 1 9.99 1.1
 3 -2 1 10.64 0.7
 3 2 1 8.94 0.82
 3 2 1 12.52 1.3
 3 -2 1 12.54 1.32
 3 -2 1 11.8 1.14
 3 2 2 149.81 3.93
 3 -2 2 191.16 5.19
 -3 -2 -2 264.93 5.06
 3 -2 2 204.58 3.25
 3 -2 2 190.37 5.35
 3 -2 2 114.72 4.25
 3 2 2 195.38 4.32
 3 2 3 403.47 6.92
 3 -2 3 434.31 8.9
 3 -2 3 391.43 8.75
 3 2 3 421.52 7.32
 3 -2 3 432.66 4.84
 3 2 4 1053.18 12.72
 3 -2 4 1067.48 15.41
 3 2 5 0.48 0.35
 3 -2 5 0.9 0.56
 3 2 5 0.55 0.37
 -3 2 -6 818.56 13.28
 3 -2 6 776.92 15.27
 3 -2 7 39.03 3.6
 3 2 7 40.73 3.21
 -3 2 -7 36.56 2.9
 3 -2 8 0.7 0.53
 3 -2 9 213.87 9.83
 3 -2 10 24.6 3.33
 3 -2 11 121.64 7.17
 3 -2 12 112.38 6.19
 3 -2 13 -0.04 0.35
 -3 3 13 36.29 2.77
 -3 -3 13 40.85 3.11
 -3 -3 13 35.59 3.02
 -3 -3 12 6.52 1.68
 -3 3 12 6.9 1.65
 -3 -3 12 4.65 1.43
 -3 -3 11 81.38 7.04
 -3 3 11 84.23 7.09
 -3 -3 10 8.12 2.6
 -3 3 10 9.35 2.66
 -3 -3 9 0.41 0.7
 3 3 -8 54.56 4.15
 3 -3 -8 62.43 4.73
 3 3 -7 8.33 1.54
 3 -3 -7 6.43 1.35
 -3 -3 7 7.27 1.74
 3 3 -6 9.54 1.53
 3 -3 -6 6.62 1.24
 -3 -3 6 6.54 1.52
 -3 3 5 510.99 7.61
 3 -3 -5 472.29 9.38
 -3 3 4 23.55 1.33
 3 3 -4 25.2 2.34
 3 -3 -4 20.97 1.74
 3 -3 -3 1044.96 10.77
 -3 -3 3 1024.55 15.1
 -3 3 3 1209.36 12.98
 3 3 -3 1411.85 17.56
 3 -3 -3 1296.11 12.54
 -3 -3 2 22.52 1.85
 3 -3 -2 23.46 1.06
 3 -3 -1 227.57 3.33
 3 3 -1 222.86 4.37
 -3 -3 0 80.55 2.99
 3 3 0 71.62 2.88
 3 -3 1 47.9 1.72
 3 -3 1 51.9 1.94
 -3 3 -1 46.69 1.45
 3 -3 1 47.06 2.64
 3 -3 1 44.87 2.32
 3 -3 2 8.79 1.15
 3 3 2 7.48 0.84
 3 -3 2 12.4 1.03
 3 -3 2 12.49 0.94
 -3 3 -2 9.13 0.83
 3 -3 2 8.66 1.15
 3 -3 3 1984.74 13.14
 3 -3 3 2017.81 20.52
 3 3 3 1975.31 15.39
 3 3 4 101.55 3.57
 3 -3 4 103.2 4.84
 3 3 4 113.38 4.03
 -3 3 -5 1593.54 17.12
 3 3 5 1623.25 17.06
 3 -3 6 6.97 1.48
 3 3 6 7.51 1.21
 -3 3 -6 9.16 1.35
 3 3 7 353.02 9.45
 3 -3 7 329.81 10.77
 3 -3 8 265.99 10.66
 3 -3 9 45.02 4.48
 3 -3 10 3.11 1.18
 3 -3 11 47.36 4.5
 3 -3 12 0.22 0.32
 3 -3 13 97.11 4.57
 -3 -4 13 0.96 0.46
 -3 -4 13 2.07 0.75
 -3 -4 12 23.33 3.08
 -3 4 12 26.06 3.05
 -3 -4 12 28.26 3.57
 -3 -4 11 33.72 4.49
 -3 4 11 38.54 4.68
 -3 -4 11 38.81 5.15
 -3 -4 10 30.66 4.77
 -3 4 10 35.73 5.08
 -3 -4 9 275 15.07
 -3 -4 9 269.34 14.46
 3 -4 -8 25 2.97
 3 4 -7 181.73 7.5
 3 -4 -7 159.48 6.71
 -3 -4 7 159.53 8.76
 3 4 -6 18.4 2.28
 3 -4 -6 14.98 1.88
 -3 -4 6 13.04 2.27
 3 -4 -5 11.89 1.45
 -3 -4 5 9.51 1.78
 -3 4 4 333.45 5.11
 3 -4 -4 340.69 7.03
 3 -4 -3 92.82 2.25
 3 -4 -3 133.27 3.69
 -3 -4 2 91.53 4.33
 3 4 -2 99.41 4.07
 3 4 -2 95.31 2.99
 3 -4 -1 417.38 5.84
 -3 -4 1 417.91 8.36
 3 -4 -1 395.65 5.23
 3 4 -1 436.42 6.92
 3 4 -1 439.21 6.72
 3 -4 -1 404.45 5.12
 3 -4 0 8.36 0.81
 -3 -4 0 8.26 1.02
 3 -4 0 7.06 0.7
 3 -4 0 7.02 0.72
 3 -4 1 381.58 7.87
 -3 -4 -1 391.74 6.61
 -3 4 -1 400.32 5.25
 3 -4 1 374.16 5.71
 3 -4 1 357.25 5.48
 3 -4 1 352.01 6.76
 -3 -4 -2 351.27 5.76
 -3 4 -2 334.38 5.56
 3 -4 2 318 7.26
 3 -4 2 306.8 7.01
 3 -4 2 291.86 5.16
 3 -4 2 307.85 5.24
 3 -4 3 89.98 4.27
 3 -4 3 82.86 3.73
 -3 4 -3 89.68 3.18
 3 -4 3 91.33 3.01
 3 -4 3 90.27 2.86
 3 4 3 86.39 3.2
 3 -4 4 462.36 10.56
 3 4 4 479.78 8.02
 3 -4 4 470.4 6.76
 3 4 5 7.26 1.1
 3 -4 5 6.91 1.41
 3 -4 6 34.03 3.3
 3 4 6 38.13 2.76
 3 4 7 156.48 6.12
 3 -4 7 148.73 7.28
 3 -4 8 0.71 0.65
 3 -4 8 1.14 0.74
 3 -4 9 372.73 13.07
 3 -4 10 6.89 1.82
 3 -4 11 202.77 9.16
 3 -4 12 48.01 3.98
 3 -4 13 6.45 1.12
 -3 -5 13 1.28 0.62
 -3 -5 13 0.72 0.39
 -3 -5 12 2.67 1.05
 -3 -5 12 1.58 0.79
 -3 -5 11 1.25 1.22
 -3 -5 11 1.05 0.74
 -3 -5 10 118 9.08
 -3 5 10 136.12 9.52
 -3 -5 9 17.59 3.82
 -3 -5 8 523.88 20.64
 3 5 -7 0.92 0.61
 -3 -5 7 1.59 1
 3 5 -6 279.19 9.12
 -3 -5 6 190.19 9.2
 3 5 -5 0.92 0.48
 -3 -5 5 0.27 0.52
 -3 -5 4 28.15 3.04
 3 -5 -4 19.36 1.32
 3 -5 -3 49.86 1.66
 -3 -5 3 40.6 3.26
 3 -5 -2 625.42 6.43
 3 -5 -2 617.58 6.86
 3 -5 -1 1.98 0.4
 3 5 -1 2.61 0.59
 -3 -5 1 3.12 0.81
 3 -5 -1 1.78 0.41
 3 -5 -1 2.5 0.47
 -3 -5 0 808.74 11.7
 3 -5 0 794.72 8.9
 3 -5 1 4.01 0.57
 -3 5 -1 5.69 0.7
 3 -5 1 3.47 0.62
 3 -5 1 3.69 0.61
 3 -5 1 4.69 0.82
 3 -5 2 145.05 3.53
 3 -5 2 140.29 4.93
 3 -5 2 137.36 4.76
 -3 5 -2 146.11 3.95
 3 -5 2 127.25 3.63
 3 -5 2 140.01 3.94
 3 5 3 65.58 2.79
 3 -5 3 64.11 3.31
 3 -5 3 67.72 3.8
 3 -5 3 73.48 2.9
 3 -5 3 77.19 2.95
 -3 5 -3 66.53 2.99
 3 -5 4 56.94 3.74
 3 5 4 59.79 2.93
 3 -5 4 54.17 2.58
 3 -5 4 54.59 2.48
 3 5 5 10.01 1.31
 3 -5 5 9.39 1.63
 3 5 6 147.58 5.32
 3 -5 6 136.73 6.64
 3 5 7 29.21 2.58
 3 -5 8 727.36 17.8
 3 -5 8 757.35 17.37
 3 -5 9 82.92 5.74
 3 -5 9 75.69 5.84
 3 -5 10 366.04 12.81
 3 -5 11 2.75 1.06
 3 -5 12 49.64 3.97
 3 -5 13 0.88 0.39
 -3 -6 13 5.77 1.11
 -3 -6 12 23.05 2.73
 -3 -6 12 25.84 3.2
 -3 -6 11 29.93 3.87
 -3 -6 11 28.51 4.32
 -3 -6 10 29.05 4.37
 -3 -6 9 357.84 16.26
 -3 -6 8 -0.39 1.23
 -3 -6 8 0.57 0.54
 3 -6 -8 2.46 0.81
 3 6 -7 172.42 7.74
 -3 -6 7 135.89 8.73
 3 6 -6 167.83 7.44
 -3 -6 6 115.41 7.72
 -3 -6 5 8.67 1.91
 3 6 -5 10.53 1.9
 3 -6 -4 194.73 3.69
 3 6 -4 165.12 7.2
 -3 -6 3 199.3 7.85
 3 -6 -3 178.18 4.26
 3 -6 -3 158.55 3.22
 3 6 -3 140.89 6.22
 3 -6 -2 87.36 2.95
 3 -6 -2 91.67 2.8
 3 6 -2 98.96 4.62
 3 -6 -2 99.93 2.8
 -3 -6 1 742.66 12.56
 3 -6 -1 633.32 8.23
 3 6 -1 694.39 11.14
 3 -6 -1 705.51 8.86
 3 -6 -1 659.54 8.05
 3 -6 0 85.88 2.96
 3 -6 0 80.96 2.81
 -3 -6 0 90.81 3.92
 3 -6 0 91.06 3.27
 3 -6 1 914.89 9.71
 -3 -6 -1 1015.49 12.19
 -3 6 -1 1017.79 10.64
 3 -6 1 909.95 10.39
 3 -6 1 977.93 11.39
 3 -6 1 921.7 11.82
 3 -6 2 327.72 7.69
 3 -6 2 304.78 6.07
 3 -6 2 297.23 5.19
 -3 6 -2 336.34 6.35
 3 -6 2 331 7.6
 3 -6 2 315.37 6.34
 3 -6 3 336.85 8.66
 -3 6 -3 348.89 7.33
 3 -6 3 313.14 7.44
 3 -6 3 325.26 6.48
 3 -6 3 318.99 6.44
 3 -6 4 412.99 10.39
 3 6 4 442.26 8.3
 3 -6 4 426.95 7.94
 3 -6 4 402.24 7.41
 3 6 5 8.77 1.18
 3 -6 5 4.72 1.23
 3 -6 5 6.54 1.04
 3 -6 6 279.11 9.66
 3 6 6 299.4 7.57
 3 -6 7 132.42 7.22
 3 -6 7 140.96 7.39
 3 -6 8 142.48 7.79
 3 -6 8 147.03 7.7
 3 -6 9 288.39 11.35
 3 -6 9 314.11 11.27
 3 -6 10 12.8 2.41
 3 -6 10 14.76 2.39
 3 -6 11 46.36 4.22
 3 -6 12 69.42 4.53
 -3 -7 13 48.75 3.11
 -3 -7 13 42.51 2.83
 -3 -7 12 0.68 0.56
 -3 -7 12 0.33 0.33
 -3 -7 11 66.56 5.34
 -3 -7 11 72.97 6.49
 -3 -7 10 17.85 3.21
 -3 -7 10 20.85 4.16
 -3 -7 9 3.18 1.69
 3 -7 -9 5.43 1.33
 3 -7 -8 93.64 5.25
 -3 -7 8 81.31 7.63
 -3 -7 7 25.35 3.87
 3 7 -7 37.77 4.22
 3 7 -6 25.83 3.36
 -3 -7 6 20.73 3.32
 -3 -7 5 367.19 13.41
 3 7 -5 339.84 11.76
 3 -7 -4 16.42 1.07
 3 -7 -4 18.82 1.55
 -3 -7 4 20.34 2.89
 3 -7 -3 1213.89 12.42
 3 -7 -3 1189.2 10.58
 3 -7 -2 294.65 6.11
 3 -7 -2 286.35 5.49
 3 -7 -2 303.22 5.4
 -3 -7 1 850.98 14.33
 3 7 -1 750.97 12.52
 3 -7 -1 770.77 9.99
 3 -7 -1 812.28 10.33
 3 -7 -1 804.32 9.69
 3 -7 0 104.5 3.46
 3 -7 0 111.44 3.63
 3 -7 1 1.52 0.45
 3 -7 1 0.72 0.3
 -3 -7 -1 0.89 0.42
 3 -7 1 1.44 0.51
 3 -7 1 0.58 0.17
 3 -7 1 0.81 0.4
 3 -7 2 7.8 1.2
 -3 7 -2 8.38 1.07
 3 -7 2 6.2 0.82
 3 -7 2 7.21 1.15
 3 -7 2 7.07 0.97
 3 -7 2 5.9 0.89
 3 -7 3 616.64 7.95
 3 -7 3 596.2 11.63
 3 -7 3 580.17 10.31
 3 -7 3 588.7 9.29
 3 -7 3 586.33 9.4
 3 7 4 103.74 4
 3 -7 4 97.71 5.07
 3 -7 4 102.82 4.02
 3 -7 4 95.34 3.77
 3 -7 5 549.35 13.01
 3 -7 5 575.14 9.89
 3 7 5 573.34 9.86
 3 7 6 3.21 0.83
 3 -7 6 0.39 0.18
 3 -7 7 227.71 9.48
 3 -7 7 232.51 9.66
 3 -7 8 45.49 4.39
 3 -7 8 50.85 4.6
 3 -7 9 8.83 1.97
 3 -7 9 7.56 1.76
 3 -7 10 39.46 4.02
 3 -7 10 40.21 3.88
 3 -7 11 59.2 4.59
 3 -7 11 68.28 4.5
 3 -7 12 0.58 0.4
 -3 -8 12 35.57 3.39
 -3 -8 11 1.68 1.02
 -3 -8 11 1.58 0.82
 -3 -8 10 27.28 3.7
 -3 -8 10 33.05 4.91
 -3 -8 9 1.66 1.27
 -3 -8 9 0.7 0.76
 3 -8 -9 1.48 0.74
 3 -8 -8 3.45 0.96
 3 -8 -7 15.5 2.26
 -3 -8 6 47.55 5.35
 3 8 -6 52.9 5.04
 -3 -8 5 24.02 3.58
 3 8 -5 21.43 3.08
 3 -8 -4 629.61 7.07
 3 -8 -4 658.7 9.61
 3 -8 -3 53.57 2.29
 3 -8 -3 57.54 2.83
 -3 -8 2 887.65 16.82
 3 -8 -2 876.63 11.05
 3 -8 -2 859.25 10.15
 -3 -8 1 149.05 6.22
 3 8 -1 137.37 5.72
 3 -8 -1 106.61 3.88
 3 -8 -1 114.55 4.08
 3 -8 -1 117.89 3.87
 3 -8 0 31.38 2.08
 3 -8 0 36.64 2.39
 3 -8 0 35.16 2.2
 3 -8 1 41 2.29
 3 -8 1 59.83 3.43
 3 -8 1 48.09 2.62
 3 -8 1 48.01 2.77
 3 -8 1 53.82 2.91
 3 -8 2 256.59 6.97
 -3 8 -2 273.46 6.73
 3 -8 2 260.21 5.71
 3 -8 2 267.14 6.43
 3 -8 2 269.86 6.67
 3 8 3 145.46 4.75
 3 -8 3 159.26 6.07
 3 -8 3 155.42 5.01
 3 -8 3 148.59 4.97
 3 -8 4 400.81 10.51
 3 8 4 422.46 8.42
 3 -8 4 405.1 8.35
 3 -8 4 387.18 8.18
 3 -8 5 0.76 0.45
 3 8 5 0.71 0.3
 3 -8 5 0.67 0.61
 3 -8 6 301.56 10.42
 3 -8 6 326.04 11.18
 3 -8 7 29.82 3.43
 3 -8 7 31.26 3.56
 3 -8 8 85.52 5.97
 3 -8 8 87.38 6.03
 3 -8 9 21.64 3.07
 3 -8 9 20.86 2.96
 3 -8 10 44.77 4.03
 3 -8 10 39.3 3.93
 3 -8 11 18.36 2.43
 3 -8 12 95.52 4.65
 -3 -9 12 1.03 0.54
 -3 -9 12 0.46 0.39
 -3 -9 11 5.08 1.56
 3 -9 -10 100.81 4.88
 -3 -9 10 95.8 7.81
 -3 -9 9 9.82 2.86
 3 -9 -9 11.13 1.77
 3 -9 -8 65.38 4.56
 -3 -9 8 44.29 6.25
 3 -9 -7 0.23 0.46
 3 -9 -6 178.96 7.87
 -3 -9 5 1.86 1.1
 3 9 -5 0.9 0.66
 3 -9 -4 50.7 2.03
 3 -9 -4 52.99 2.8
 -3 -9 4 54.29 5.16
 3 -9 -3 9.22 1.06
 3 -9 -3 7.64 1.13
 -3 -9 2 330.39 11
 3 -9 -2 315.41 6.89
 3 -9 -2 296.66 7.01
 3 -9 -2 312.95 6.43
 -3 -9 1 474.4 11.98
 3 -9 -1 446.54 8.79
 3 -9 -1 393.87 8.07
 3 -9 -1 420.2 7.94
 3 -9 0 389.01 8.39
 3 -9 0 376.39 7.77
 3 -9 1 12.56 1.36
 3 -9 1 12.17 1.41
 3 -9 1 11.97 1.44
 3 -9 2 420.12 8.81
 3 -9 2 420.46 7.72
 3 -9 2 430.1 8.62
 3 -9 2 411.85 8.96
 3 -9 3 133.82 4.96
 3 -9 3 139.27 5.63
 3 9 3 132.46 4.78
 3 -9 3 133.88 4.85
 3 9 4 37.86 2.57
 3 -9 4 37.91 2.67
 3 -9 4 36.62 3.18
 3 -9 4 30.31 2.36
 3 -9 5 78.57 5.01
 3 9 5 93.02 4.27
 3 -9 5 85.63 4.17
 3 -9 6 12.62 2.22
 3 -9 6 10.71 1.97
 3 -9 7 111.24 6.54
 3 -9 7 115.34 6.89
 3 -9 8 270.45 10.4
 3 -9 8 272.62 10.76
 3 -9 9 1.8 0.99
 3 -9 9 1.61 0.87
 3 -9 10 148.8 7.29
 3 -9 10 152.56 7.26
 3 -9 11 6.05 1.33
 3 -9 12 37.72 2.71
 -3 -10 12 8.23 1.36
 -3 -10 11 43.66 4.09
 -3 -10 10 3.8 1.48
 3 -10 -10 3.16 0.92
 3 -10 -9 168.88 6.76
 -3 -10 9 164.77 10.86
 -3 -10 8 2.44 1.35
 3 -10 -8 3.89 1.12
 3 -10 -7 225.65 8.96
 -3 -10 7 237.14 14.13
 3 -10 -6 18.22 2.57
 3 -10 -6 20.13 2.73
 3 10 -5 23.46 3.38
 3 -10 -4 98.28 4.14
 -3 -10 4 120.09 8.1
 -3 -10 3 7.1 1.84
 3 -10 -3 5.07 0.81
 3 -10 -3 5.18 1
 3 10 -3 3.28 1.1
 3 -10 -2 0.89 0.39
 3 -10 -2 0.84 0.36
 3 -10 -2 0.42 0.3
 -3 -10 2 0.86 0.57
 3 10 -2 1.16 0.7
 -3 -10 1 629.8 14.19
 3 -10 -1 644.46 11.14
 3 -10 -1 621.5 10.3
 3 -10 0 18.67 1.9
 3 -10 0 18.39 1.8
 3 -10 0 17.95 1.77
 3 -10 1 611.42 10.1
 3 -10 1 633.86 10.84
 3 -10 1 647.39 11.47
 3 -10 2 75.01 3.38
 3 -10 2 77.71 3.84
 3 -10 2 79.12 3.98
 3 -10 3 371.95 9.32
 3 10 3 348.53 8.2
 3 -10 3 362.97 8.48
 3 -10 3 355.53 8.57
 3 -10 4 19.16 2.29
 3 10 4 23.47 2.07
 3 -10 4 23.03 2.16
 3 -10 4 22.12 2.11
 3 -10 5 162.37 7.86
 3 -10 6 10.55 2.12
 3 -10 7 522.66 13.97
 3 -10 7 510.68 14.7
 3 -10 8 3.09 1.06
 3 -10 8 3.78 1.34
 3 -10 9 580.96 14.59
 3 -10 9 575.71 14.89
 3 -10 10 0.45 0.47
 3 -10 10 1.05 0.66
 3 -10 11 122.37 5.4
 -3 -11 12 2.53 0.68
 -3 -11 11 26.96 2.94
 3 -11 -10 86.23 4.21
 -3 -11 10 81.09 6.22
 -3 -11 9 4.26 1.61
 3 -11 -9 4.51 1.07
 3 -11 -8 173.32 7.3
 -3 -11 8 107.48 8.88
 3 -11 -7 69.3 4.95
 -3 -11 7 71.42 7.3
 3 -11 -6 52.57 4.43
 3 -11 -6 56.95 4.52
 -3 -11 6 60.06 6.54
 3 -11 -5 350.88 11.5
 3 11 -4 6.89 1.76
 3 -11 -4 13.09 2.14
 3 -11 -3 195.51 5.15
 3 -11 -3 197.02 6.3
 3 -11 -2 48.72 2.92
 3 -11 -2 45.6 3
 3 -11 -1 1.81 0.55
 3 -11 -1 2.28 0.7
 3 -11 -1 1.47 0.47
 3 -11 0 425.2 9.58
 3 -11 0 409.32 8.9
 3 -11 1 26.78 2.19
 3 -11 1 27.3 2.32
 3 -11 1 25.83 2.3
 3 -11 2 297.59 7.1
 3 -11 2 304.76 7.93
 3 -11 2 297.96 8.07
 3 -11 3 70.68 3.91
 3 11 4 10.65 1.53
 3 -11 4 10.23 1.93
 3 -11 5 733.95 17.05
 3 -11 6 40.4 4.09
 3 -11 7 234.74 9.88
 3 -11 8 268.69 10.28
 3 -11 8 271.65 9.74
 3 -11 9 0.84 0.57
 3 -11 9 0.97 0.76
 3 -11 10 288.63 8.71
 3 -11 11 14.42 1.84
 -3 -12 11 10.57 1.62
 3 -12 -10 96.15 4.15
 -3 -12 10 96.53 6.11
 3 -12 -9 17.82 2.04
 -3 -12 9 12.7 2.51
 -3 -12 8 1.59 0.92
 3 -12 -8 2.43 0.94
 3 -12 -7 80.82 4.95
 3 -12 -7 74.6 5.04
 -3 -12 7 73.73 6.93
 3 -12 -6 58.42 4.61
 3 -12 -6 55.54 4.44
 3 -12 -5 6.17 1.52
 3 -12 -4 602.73 15.11
 3 -12 -3 12.3 2.14
 3 -12 -1 32.63 2.59
 3 -12 -1 31.74 2.56
 3 -12 -1 32.02 2.43
 3 -12 0 0.46 0.29
 3 -12 0 0.41 0.13
 3 -12 1 44.89 2.91
 3 -12 2 239.39 8.72
 3 -12 3 1.89 0.78
 3 -12 3 2.01 0.92
 3 -12 4 568.41 14.93
 3 -12 4 555.31 14.23
 3 -12 5 49.61 4.54
 3 -12 5 46.34 4.2
 3 -12 6 158.23 7.86
 3 -12 7 0.7 0.77
 3 -12 8 49.11 4.3
 3 -12 9 19.18 2.66
 3 -12 10 6.67 1.32
 3 -13 -10 6.49 1.04
 -3 -13 10 6.81 1.42
 3 -13 -9 37.95 2.81
 -3 -13 9 32.01 3.65
 -3 -13 8 7.04 1.87
 3 -13 -8 12.04 1.79
 3 -13 -7 83.82 4.91
 3 -13 -7 82.12 5.08
 -3 -13 7 79.28 6.56
 3 -13 -6 161.61 7.46
 3 -13 -6 153.6 7.25
 3 -13 -5 380.05 11.89
 3 -13 -4 2.82 1.08
 3 -13 -3 429.62 12.52
 3 -13 -2 114.82 6.38
 3 -13 -1 253.97 9.47
 3 -13 0 22.52 2.84
 3 -13 0 25.05 2.69
 3 -13 1 227.17 9.01
 3 -13 1 225.36 8.28
 3 -13 2 67.68 4.67
 3 -13 3 416.83 12.25
 3 -13 4 6.2 1.55
 3 -13 5 415.41 13.34
 3 -13 5 385.04 11.99
 -3 -13 -6 81.31 5.28
 3 -13 6 84.6 6.08
 3 -13 6 77.11 5.41
 3 -13 7 82.42 5.98
 3 -13 7 75.77 5.24
 3 -13 8 18.21 2.66
 3 -13 9 3.92 1.13
 3 -13 10 12.63 1.69
 3 -14 -10 14.81 1.34
 -3 -14 10 15.25 1.72
 3 -14 -9 73.02 3.61
 -3 -14 9 69.86 4.59
 3 -14 -8 6.97 1.26
 -3 -14 8 7.96 1.79
 3 -14 -7 131.11 6.08
 3 -14 -7 125.78 5.61
 3 -14 -6 19.16 2.46
 3 -14 -6 17.48 2.31
 3 -14 -5 26.51 3.06
 3 -14 -5 26.66 2.93
 3 -14 -4 67.04 4.91
 3 -14 -3 60.17 4.7
 3 -14 -2 135.18 6.96
 3 -14 -1 499.44 13.38
 3 -14 0 62.83 4.32
 3 -14 0 60.21 4.68
 3 -14 1 961.45 19.14
 3 -14 1 1094.41 18.79
 3 -14 2 51.38 4.14
 3 -14 3 278.65 10.02
 3 14 3 299.51 9.02
 3 -14 4 149.45 7.56
 3 -14 5 62.98 5.03
 -3 -14 -6 2.3 0.84
 3 -14 6 2.04 0.79
 -3 -14 -7 154.12 6.23
 3 -14 7 165.07 8.06
 3 -14 8 1.96 0.81
 3 -14 9 100.87 5.11
 3 -15 -9 0.84 0.46
 3 -15 -8 120.11 4.78
 3 -15 -7 5.2 1.05
 3 -15 -7 5.04 1.04
 3 -15 -6 138.71 6.19
 3 -15 -6 131.53 6.08
 3 -15 -5 0.83 0.6
 3 -15 -5 0.83 0.37
 3 -15 -4 6.33 1.51
 3 -15 -4 5.94 1.31
 3 -15 -3 0.79 0.55
 3 -15 -2 139.66 7.09
 3 -15 -1 6.48 1.54
 3 -15 0 237.97 9.27
 3 -15 1 28.22 3.02
 3 -15 1 23.23 2.82
 3 -15 2 930.02 17.85
 3 -15 3 4.87 1.38
 3 15 3 4.62 1.09
 3 -15 4 87.72 5.7
 -3 -15 -5 4.87 1.34
 3 -15 5 6.73 1.54
 -3 -15 -6 71.14 4.57
 3 -15 6 75.17 5.18
 -3 -15 -7 16.87 1.88
 3 -15 7 18.52 2.49
 3 -15 8 153.42 6.49
 3 -15 9 4.02 0.87
 3 -16 -9 37.25 2.04
 3 -16 -8 4.47 0.86
 3 -16 -7 85.62 3.76
 3 -16 -7 88.47 4.17
 3 -16 -6 39.31 3.03
 3 -16 -6 41.9 3.12
 3 -16 -5 8.62 1.56
 3 -16 -5 9.33 1.52
 3 -16 -4 63.05 4.41
 3 -16 -4 63.24 4.13
 3 -16 -3 17.79 2.42
 3 -16 -3 18.2 2.19
 3 -16 -2 59.99 4.48
 3 -16 -2 58.42 3.86
 3 -16 -1 156.91 7.28
 -3 -16 1 173.97 9.37
 3 -16 0 31.5 3.27
 3 -16 1 198.03 8.24
 3 -16 2 5.68 1.53
 -3 -16 -3 191.24 9.14
 3 -16 3 213.83 8.42
 -3 -16 -4 154.07 7.66
 3 -16 4 182.12 7.98
 -3 -16 -5 0.51 0.46
 3 -16 5 1.81 0.92
 -3 -16 -6 121.24 5.55
 3 -16 6 135.36 6.52
 -3 -16 -7 109.7 4.42
 3 -16 7 112.91 5.6
 3 -16 8 38.49 2.9
 3 -17 -8 0.61 0.33
 3 -17 -7 33.15 2.09
 3 -17 -7 37.97 2.44
 3 -17 -6 28.18 2.28
 3 -17 -6 33.59 2.48
 3 -17 -5 89.83 4.38
 3 -17 -5 93.82 4.68
 3 -17 -4 0.4 0.38
 3 -17 -4 0.31 0.29
 3 -17 -3 168.34 6.98
 3 -17 -3 160.39 6.19
 3 -17 -2 3.25 0.98
 -3 -17 1 113.07 7.07
 3 -17 -1 99.29 5.51
 3 -17 0 17.24 2.3
 -3 -17 0 27.42 3.55
 3 -17 1 13.7 2.06
 -3 -17 -1 20.36 2.99
 -3 -17 -2 16.97 2.68
 3 17 2 16.58 1.93
 -3 -17 -3 153.59 7.75
 3 -17 3 173.8 7.26
 3 -17 4 12.38 2.01
 -3 -17 -4 8 1.64
 -3 -17 -5 367.9 10.16
 3 -17 5 433.26 11.07
 3 -17 6 2.89 1.03
 -3 -17 -6 2.9 0.85
 3 -17 7 251.43 7.22
 3 -18 -7 36.02 2.05
 3 -18 -6 18.45 1.57
 3 -18 -6 22.45 1.8
 3 -18 -5 2.86 0.73
 3 -18 -5 2.61 0.66
 3 -18 -4 99.86 4.65
 3 -18 -4 110.08 4.53
 3 -18 -3 1.87 0.64
 3 -18 -3 0.84 0.24
 3 -18 -2 65.03 4.09
 3 -18 -1 84.62 4.74
 -3 -18 1 67.44 4.97
 3 -18 0 1.48 0.64
 -3 -18 0 1.06 0.7
 -3 -18 -1 136.25 7.31
 3 18 1 106.64 4.93
 -3 -18 -2 53.66 4.45
 -3 -18 -3 11.79 1.99
 -3 -18 -4 298.04 9.21
 -3 -18 -5 21.15 2.17
 -3 -18 -6 312.14 7.15
 3 -19 -5 11.52 1.2
 3 -19 -5 14.8 1.37
 3 -19 -4 7.78 1.12
 3 -19 -4 12.15 1.31
 3 -19 -3 46.29 2.95
 3 -19 -2 69.32 3.79
 3 -19 -1 22.1 2.16
 -3 -19 0 257.53 8.87
 3 19 0 285.57 7.49
 -3 -19 -1 5.56 1.32
 -3 -19 -2 176.22 7.2
 -3 -19 -3 72.67 4.38
 -3 -19 -4 8.67 1.37
 -3 -19 -5 102.03 4.16
 3 -20 -4 0.29 0.17
 3 -20 -3 24.29 1.83
 3 -20 -2 0.47 0.13
 3 -20 -1 272.88 6.66
 3 20 -1 164.03 4.74
 -3 -20 0 5.17 1.03
 -3 -20 -1 193.68 6.61
 -3 -20 -2 5.9 1.14
 -3 -20 -3 87.93 4.1
 -4 0 13 0.12 0.17
 -4 0 12 7.52 1.65
 -4 0 12 7.86 1.75
 -4 0 11 -0.09 0.4
 -4 0 10 126.79 8.66
 -4 0 9 0.03 0.58
 -4 0 8 186.21 10.19
 4 0 -8 181.92 9
 4 0 -7 0 0.16
 -4 0 6 465.09 10.49
 4 0 -6 441.96 10.4
 -4 0 5 0.2 0.24
 4 0 -5 0.74 0.46
 -4 0 4 522.99 8.77
 4 0 -4 552.9 10.63
 -4 0 3 0.16 0.11
 -4 0 2 894.84 10.15
 -4 0 1 0.52 0.36
 4 0 -1 0.23 0.16
 -4 0 0 752.31 12.29
 4 0 0 852.75 13.32
 4 0 1 0.26 0.17
 4 0 1 -0.02 0.1
 4 0 2 849.37 11.67
 4 0 2 895.97 14.19
 4 0 3 0.74 0.39
 4 0 3 0.09 0.16
 4 0 4 68.57 3.77
 4 0 4 65.44 4.06
 4 0 5 -0.14 0.4
 4 0 5 0.17 0.11
 4 0 6 44.12 3.48
 4 0 6 50.01 4.18
 -4 0 -7 0.59 0.33
 4 0 8 573.56 15.4
 4 0 9 -0.04 0.33
 4 0 10 311.85 11.12
 4 0 11 0.24 0.49
 4 0 12 81.53 4.32
 -4 -1 13 0.36 0.37
 -4 1 13 0.09 0.12
 -4 -1 12 33.57 3.57
 -4 1 12 34.13 3.6
 -4 -1 12 36.43 3.69
 -4 -1 11 26.93 3.89
 -4 1 11 25.7 3.7
 -4 -1 10 6.1 1.93
 -4 1 10 4.42 1.5
 -4 -1 9 73.1 6.78
 -4 1 9 75.32 6.53
 4 -1 -9 72.47 5.84
 -4 -1 8 6.78 2
 -4 1 8 7.56 2.07
 4 1 -8 5.41 1.38
 4 -1 -8 6.94 1.63
 4 1 -7 162.51 6.9
 4 -1 -7 163.33 6.8
 -4 1 6 43.3 3.04
 4 1 -6 37.99 3.1
 4 -1 -6 39.09 3
 -4 1 5 29.42 2.07
 4 1 -5 32.44 2.71
 4 -1 -5 32.34 2.54
 -4 -1 5 34.75 2.85
 -4 1 4 1117.31 12.04
 -4 -1 4 1132.73 13.92
 -4 -1 3 4.22 0.8
 -4 1 3 0.84 0.31
 -4 -1 2 266.65 5.33
 -4 1 2 276.79 5.27
 -4 1 1 59.49 3.39
 4 1 -1 62.48 3.61
 -4 -1 0 6.13 0.84
 4 -1 0 8.53 0.89
 4 1 0 9.36 0.82
 4 1 0 8.73 1.34
 4 -1 0 7.47 1.27
 4 -1 1 401.53 6.71
 -4 -1 -1 425.81 8.37
 4 -1 1 396.45 7.29
 4 1 1 401.7 6.68
 4 1 1 365.79 8.7
 4 -1 1 384.86 9.27
 4 -1 2 28.95 1.88
 4 1 2 26.96 1.93
 -4 -1 -2 27.99 2.4
 4 -1 2 27.1 2.2
 4 -1 2 27.41 2.42
 4 -1 2 27.22 2.11
 -4 -1 -3 375.5 8.75
 4 -1 3 206.77 6.92
 4 1 3 213.52 6.2
 4 1 3 303.37 7.04
 4 -1 3 306.84 7.62
 4 -1 4 149.73 5.75
 4 1 4 145.99 5.24
 4 -1 5 0.29 0.16
 4 1 5 0.34 0.33
 4 1 5 0.8 0.46
 4 -1 5 0.69 0.54
 4 -1 6 259 8.86
 4 1 6 278.85 9.56
 4 -1 7 94.01 6.1
 4 -1 7 95.01 5.57
 4 1 7 101.8 5.71
 4 -1 8 11.08 2.13
 4 1 8 10.34 1.99
 4 1 9 243.91 9.89
 4 -1 9 235.81 10
 4 1 10 1.43 0.7
 4 -1 10 1.37 0.71
 4 1 11 151.18 6.89
 4 -1 11 141.33 7
 4 -1 12 22.47 2.37
 -4 -2 13 46.77 3.17
 -4 2 13 48.32 3.07
 -4 -2 13 48.87 3.03
 -4 -2 12 3.43 1.21
 -4 -2 12 3.2 1.14
 -4 2 12 3.4 1.1
 -4 -2 11 73.96 6.25
 -4 2 11 81.35 6.49
 -4 -2 10 2.53 1.32
 -4 2 10 0.86 0.34
 -4 -2 10 2.51 1.68
 -4 2 9 39.95 4.67
 -4 -2 9 43.79 5.43
 -4 -2 8 26.83 4.05
 -4 2 8 23.99 3.48
 4 -2 -8 28.55 3.42
 4 -2 -7 4.98 1.12
 4 2 -7 5.47 1.29
 -4 -2 7 4.98 1.41
 4 2 -6 -0.05 0.13
 -4 -2 6 0.52 0.51
 -4 -2 5 125.69 5.71
 4 2 -5 122.13 5.46
 4 -2 -5 111.11 4.6
 -4 2 5 105.22 3.79
 -4 2 4 117.7 3.43
 4 -2 -4 131.45 4.74
 -4 -2 3 1414.88 15.68
 -4 2 3 1370.52 12.04
 -4 -2 2 49.79 2.63
 4 2 -2 62.59 1.72
 -4 -2 1 491.65 7.7
 4 2 -1 486.18 5.35
 -4 -2 0 0.84 0.3
 4 2 0 1.21 0.32
 4 2 0 0.97 0.42
 4 -2 0 1.69 0.48
 -4 -2 -1 25.43 1.8
 4 2 1 31.92 1.81
 4 -2 1 27.96 2.07
 4 2 1 27.61 2.37
 4 -2 1 24.37 2.23
 4 -2 2 693.04 7.51
 4 -2 2 610.95 11.2
 4 2 2 580.84 8.91
 4 -2 2 606.44 11.76
 -4 -2 -2 694.57 8.89
 4 -2 2 597.88 10.44
 4 -2 3 138.66 5.33
 4 -2 3 156.05 4.01
 -4 -2 -3 172.37 4.32
 4 2 3 102.07 4.1
 4 -2 3 91.91 4.79
 4 2 4 0.69 0.43
 4 -2 4 0.63 0.38
 4 2 5 1018.55 16.42
 4 -2 5 1004.49 16.98
 4 2 6 2.85 0.85
 4 -2 6 0.88 0.66
 4 2 7 178.25 7.49
 4 -2 7 180.42 8.5
 4 -2 8 77.2 5.7
 4 -2 9 1.71 0.94
 4 -2 10 133 7.34
 4 -2 11 61.49 4.67
 4 -2 12 6.02 1.24
 -4 -3 13 0.19 0.24
 -4 -3 13 0.27 0.34
 -4 3 13 0.24 0.18
 -4 -3 12 67.2 4.88
 -4 3 12 64.59 4.62
 -4 -3 12 69.96 5.14
 -4 -3 11 17.08 2.99
 -4 3 11 18.64 3.05
 -4 -3 10 50.55 5.79
 -4 -3 10 51.57 5.71
 -4 -3 9 39.79 5.26
 -4 -3 8 7.24 2.39
 -4 3 8 7.12 1.83
 4 -3 -8 6.13 1.55
 4 -3 -8 6.42 1.41
 4 3 -7 6.43 1.43
 4 -3 -7 5.03 1.09
 -4 -3 7 5.65 1.56
 4 3 -6 67.47 4.42
 4 -3 -6 61.15 3.63
 -4 3 5 18.22 1.45
 4 3 -5 23.61 2.51
 4 -3 -5 20.18 1.91
 -4 -3 5 26.28 2.78
 -4 3 4 510.94 7.05
 4 -3 -4 562.29 9.62
 -4 -3 3 91.7 4.4
 -4 3 3 79.08 3.05
 4 3 -2 432.82 8.96
 4 -3 -2 426.42 7.17
 -4 -3 1 530.59 9.07
 4 3 -1 546.86 10.3
 4 -3 -1 514.09 6.14
 4 -3 0 44.14 1.66
 4 3 0 53.25 2.06
 4 3 0 50.6 3.07
 4 -3 1 10.76 1.52
 4 -3 1 10.16 0.82
 4 3 1 12.45 1.13
 4 -3 2 663.19 6.78
 4 3 2 653.54 9.38
 4 -3 2 678.23 12.65
 4 -3 2 670.16 11.32
 4 -3 3 151.11 5.74
 4 -3 3 142.12 5.82
 4 -3 4 974.81 15.86
 4 3 4 855.58 13.18
 4 3 5 12.95 1.78
 4 -3 5 10.44 1.76
 4 3 6 710.49 14.53
 4 -3 6 660.94 14.78
 4 -3 7 618.94 16
 4 3 7 631.15 13.95
 4 3 7 662.53 15.24
 4 -3 8 409.32 13.27
 4 -3 9 31.17 3.7
 4 -3 10 -0.41 0.77
 4 -3 11 0.89 0.48
 4 -3 12 127.73 5.76
 -4 -4 13 8.93 1.28
 -4 -4 13 9.72 1.36
 -4 -4 12 0.64 0.62
 -4 -4 12 0.66 0.5
 -4 4 12 0.65 0.46
 -4 -4 11 30.29 3.88
 -4 4 11 32 3.83
 -4 -4 10 160.15 10.01
 -4 -4 9 48.95 6.01
 4 -4 -9 49.34 3.81
 -4 -4 8 153.12 10.61
 4 -4 -8 142.71 6.63
 4 4 -7 20.15 2.67
 -4 -4 7 22.48 3.28
 4 4 -6 87.6 5.19
 -4 -4 6 86.17 5.94
 -4 -4 5 30.05 3.3
 -4 4 4 70.61 2.7
 -4 4 3 235.83 6.79
 4 -4 -3 251.42 5.77
 4 -4 -2 546.19 6.6
 -4 -4 2 548.26 11.33
 4 -4 -1 119.99 2.81
 4 4 -1 119.09 4.48
 -4 -4 0 793.62 11.95
 4 -4 0 877.22 8.08
 4 -4 1 5.26 1.14
 4 -4 1 2.91 0.46
 4 4 1 5.29 0.75
 -4 -4 -1 6.66 1.01
 -4 -4 -2 383.77 7.52
 4 -4 2 363 5.45
 4 4 2 381.35 7.11
 4 -4 2 398.9 9.78
 4 -4 2 390.04 8.77
 4 -4 3 304.7 8.37
 4 -4 3 308.42 4.96
 4 -4 3 296.8 8.45
 4 -4 4 51.04 3.67
 4 4 4 48.57 3.1
 4 -4 5 144.38 6.59
 4 4 5 140.67 5.67
 4 -4 6 41.66 3.74
 4 4 6 44.11 3.52
 4 -4 7 14.47 2.48
 4 4 7 12.37 1.86
 4 -4 7 15.76 2.42
 4 -4 8 422.17 13.49
 4 4 8 405.37 11.02
 4 -4 9 95.26 6.39
 4 -4 10 344.16 11.79
 4 -4 11 39.72 3.69
 4 -4 12 66.82 4.06
 -4 -5 13 3.24 0.78
 -4 -5 13 2.97 0.67
 -4 -5 12 1.31 0.73
 -4 -5 12 0.44 0.28
 -4 -5 11 7.55 1.91
 -4 5 11 6.32 1.6
 -4 -5 11 10.05 2.47
 -4 -5 10 1.1 1.02
 -4 5 10 1.47 1.2
 -4 -5 9 430.38 18.23
 -4 -5 9 414.07 16.85
 4 -5 -9 396.71 11.06
 -4 -5 8 4.02 1.61
 4 -5 -8 7 1.55
 -4 -5 7 337.15 13.27
 -4 -5 6 7.58 1.94
 -4 -5 5 27.22 3.4
 -4 5 4 2.75 0.55
 -4 -5 4 3.44 1.13
 4 -5 -4 2.24 0.58
 4 -5 -3 10.3 1.03
 4 -5 -2 2.7 0.49
 -4 -5 2 2.18 0.68
 -4 -5 1 617.72 12.96
 4 -5 -1 977.02 8.8
 4 -5 0 2.85 0.49
 -4 -5 -1 985.47 14.08
 4 -5 1 885.49 9.62
 4 5 1 956.38 10.73
 4 -5 1 919.8 15.14
 4 -5 2 4.49 0.67
 4 -5 2 3.24 0.82
 4 5 2 3.04 0.64
 4 -5 2 3.64 0.94
 4 -5 3 226.21 7.35
 4 -5 3 211.17 4.63
 4 -5 3 213.95 7.27
 4 -5 4 7.78 1.44
 4 5 4 8.5 1.3
 4 5 5 7.02 1.26
 4 -5 5 6.57 1.41
 4 -5 6 24.33 2.95
 4 -5 7 449.61 13.59
 4 5 7 450.67 11.45
 4 -5 7 477.52 13.46
 4 -5 8 73.18 5.59
 4 5 8 69.91 4.45
 4 -5 8 81.1 5.47
 4 -5 9 521 14.87
 4 -5 10 -0.23 0.4
 4 -5 11 181.34 7.77
 4 -5 12 0.61 0.43
 -4 -6 13 8.58 1.05
 -4 -6 13 10.11 1.28
 -4 -6 12 -0.14 0.28
 -4 -6 12 0.53 0.46
 -4 -6 11 27.93 3.42
 -4 -6 11 32.72 4.17
 -4 -6 10 67.51 6.17
 4 -6 -10 62.32 4.05
 -4 -6 9 19.44 3.63
 4 -6 -9 21.85 2.64
 -4 -6 8 265.2 14.81
 4 -6 -8 261.87 9.22
 -4 -6 7 24.58 4.34
 4 -6 -7 22.75 2.7
 -4 -6 6 173.66 9.58
 -4 -6 5 40.72 4.43
 4 -6 -4 23.29 1.86
 -4 6 4 27.16 1.83
 -4 -6 4 22.79 3.19
 4 -6 -3 145.49 3.47
 -4 -6 3 89.86 5.79
 4 -6 -2 49.87 2.01
 -4 -6 2 41.49 3.6
 4 -6 -1 303.37 5.37
 -4 -6 0 1138.35 17.01
 4 -6 0 1121.64 11.51
 4 -6 0 1102.53 11.41
 4 -6 1 137.65 3.91
 4 -6 1 140.19 4
 4 -6 1 150.55 6.18
 4 -6 2 722.23 9.38
 4 -6 2 716.56 9.69
 4 -6 2 737.02 13.78
 4 -6 2 711.07 12.57
 4 -6 3 165.74 6.4
 4 -6 3 159.13 4.24
 4 -6 3 158.31 6.32
 4 -6 4 107.5 5.49
 4 6 4 98.09 4.34
 4 6 5 188.94 6.68
 4 -6 5 184.3 7.64
 4 -6 6 53.61 4.5
 4 6 6 54.59 3.83
 4 -6 6 58.41 4.65
 4 -6 7 266.06 10.42
 4 6 7 265.55 8.65
 4 -6 7 288.65 10.64
 4 -6 8 238.72 10.03
 4 6 8 239.75 8.12
 4 -6 9 2.59 0.98
 4 -6 9 2.26 1.04
 4 -6 10 101.32 6.16
 4 -6 11 24.17 2.74
 4 -6 12 25.79 2.31
 -4 -7 12 33.71 2.63
 -4 -7 12 38.24 3.34
 -4 -7 11 0.98 0.85
 -4 -7 11 -0.1 0.25
 -4 -7 10 63.97 5.72
 4 -7 -10 61.21 4
 -4 -7 9 17.15 3.32
 4 -7 -9 11.62 1.94
 -4 -7 8 4.34 1.72
 4 -7 -8 4.37 1.35
 -4 -7 7 114.36 9.78
 4 -7 -7 109.53 6.06
 -4 -7 6 153.96 9.68
 -4 -7 5 39.39 4.6
 4 -7 -4 361.27 6.65
 -4 -7 4 259.46 11.35
 4 -7 -3 61.3 2.33
 -4 -7 3 54.79 4.9
 -4 -7 2 1099.95 21.28
 4 -7 -2 1026.26 10.3
 -4 -7 1 4.28 1.17
 4 -7 -1 6.46 0.9
 4 -7 -1 5.53 0.82
 4 -7 0 108.33 3.67
 4 -7 0 102.26 3.41
 4 -7 1 25.96 1.88
 4 -7 1 22.12 1.66
 4 -7 1 23.16 2.45
 4 7 2 142.88 4.72
 4 -7 2 168.72 4.99
 4 -7 2 157.16 6.43
 4 -7 2 142.77 4.3
 4 -7 2 156.86 5.95
 4 -7 3 272.37 8.37
 4 -7 3 282.11 8.53
 4 -7 3 282.35 6.45
 4 -7 4 246.42 8.43
 4 7 4 242.07 7.2
 4 -7 5 0.81 0.55
 4 7 5 0.63 0.4
 4 -7 6 303.52 10.73
 4 7 6 303.28 9.1
 4 -7 6 320.81 11.21
 4 7 7 50.55 3.69
 4 -7 7 46.32 4.33
 4 -7 7 47.82 4.32
 4 7 8 148.87 6.27
 4 -7 8 166.69 8.01
 4 -7 8 154.65 7.93
 4 -7 9 33.91 3.65
 4 -7 9 39.64 3.79
 4 -7 10 6.64 1.5
 4 -7 11 1.55 0.66
 4 -7 12 47.22 2.91
 -4 -8 12 1.89 0.67
 -4 -8 12 1.02 0.35
 -4 -8 11 27.28 2.75
 -4 -8 11 34.01 3.84
 -4 -8 10 19.59 2.92
 4 -8 -10 22.28 2.37
 -4 -8 10 23.84 3.92
 4 -8 -9 14.85 2.18
 4 -8 -8 28.42 3.18
 4 -8 -7 23.33 2.87
 -4 -8 6 1.35 0.67
 4 -8 -6 2.9 0.95
 -4 -8 5 243.72 12.36
 -4 -8 4 0.07 0.59
 4 -8 -4 1.49 0.49
 4 -8 -3 438.14 6.58
 -4 -8 3 433.79 14.68
 4 -8 -2 105.59 3.49
 -4 -8 2 133.13 7.57
 4 -8 -1 91.64 3.69
 -4 -8 1 98.41 5.95
 4 -8 -1 100.97 3.7
 4 -8 -1 92.48 3.37
 4 -8 0 103.76 3.84
 4 -8 0 111.69 4.01
 4 -8 0 106.77 3.77
 4 -8 1 17.15 1.66
 4 -8 1 14.33 2
 4 -8 1 14.9 1.44
 4 8 2 73.03 3.54
 4 -8 2 77.77 4.61
 4 -8 2 77 3.5
 4 -8 2 68.48 3.18
 4 -8 2 72.3 4.07
 4 -8 3 139.22 4.74
 4 -8 3 133.4 4.52
 4 -8 3 138.82 6.03
 4 -8 4 20.2 2.43
 4 8 4 20.64 2.19
 4 -8 4 21.9 1.98
 4 8 5 294.74 8.7
 4 -8 5 293.39 10.19
 4 -8 5 320.13 11
 4 -8 6 9.35 1.87
 4 8 6 13.46 1.87
 4 -8 6 14.11 2.42
 4 -8 7 252.98 9.96
 4 8 7 241.94 8.04
 4 -8 7 269.09 10.24
 4 -8 8 22.34 2.93
 4 -8 8 25.36 3.14
 4 -8 9 0.74 0.24
 4 -8 10 41.77 3.69
 4 -8 11 72.02 4.23
 -4 -9 12 5.73 1.12
 -4 -9 11 30.36 3.33
 -4 -9 10 5.28 1.79
 4 -9 -10 5.3 1.17
 4 -9 -9 134.52 6.37
 -4 -9 9 134.01 9.97
 4 -9 -8 1.48 0.88
 4 -9 -7 55.39 4.48
 4 -9 -6 5.92 1.46
 4 -9 -6 6.12 1.46
 4 -9 -5 124.07 6.66
 4 -9 -4 30.74 1.8
 -4 -9 4 20.51 3.68
 4 -9 -3 14.46 1.24
 -4 -9 3 26.13 3.75
 4 -9 -2 77.25 3.65
 4 -9 -2 81.51 3.28
 -4 -9 2 76.39 5.96
 4 -9 -2 85.86 3.31
 4 -9 -1 319.42 7.04
 4 -9 -1 314.6 6.59
 4 -9 0 3.2 0.75
 4 -9 0 1.74 0.52
 4 -9 0 2.31 0.62
 4 -9 1 219.2 5.74
 4 -9 1 218.14 5.81
 4 9 2 14.1 1.66
 4 -9 2 10.85 1.4
 4 -9 2 11.32 1.39
 4 -9 3 161.33 5.35
 4 -9 3 149.71 4.98
 4 -9 3 159.95 6.55
 4 -9 4 94.06 5.91
 4 9 5 40.83 3.27
 4 -9 5 45.09 3.93
 4 -9 5 45.88 4.23
 4 9 6 252.85 8.22
 4 -9 6 268.07 10.31
 4 -9 6 246.07 9.51
 4 9 7 133.89 5.87
 4 -9 7 144.24 7.54
 4 -9 7 137.32 7.19
 4 -9 8 28.02 3.25
 4 -9 8 30.62 3.4
 4 -9 9 222.52 8.76
 4 -9 10 0.69 0.46
 4 -9 11 106.05 4.88
 4 -9 11 125.3 5.07
 -4 -10 12 3.36 0.76
 -4 -10 11 4.29 1.19
 4 -10 -10 74.02 4.05
 -4 -10 10 76.81 6.06
 -4 -10 9 4.69 1.79
 4 -10 -9 3 1.05
 4 -10 -8 216.43 8.45
 -4 -10 8 211.28 12.99
 4 -10 -7 5 1.33
 4 -10 -6 32 3.36
 4 -10 -6 33.68 3.51
 4 -10 -5 12.77 2.15
 4 -10 -5 15.17 2.34
 4 -10 -4 52.55 4.37
 4 -10 -4 49.3 4.09
 4 -10 -3 46.33 2.29
 -4 -10 3 65.9 6.34
 4 -10 -2 197.89 5.32
 4 -10 -2 194.99 6.03
 4 -10 -1 14.02 1.55
 -4 -10 1 16.18 2.71
 4 -10 -1 14.88 1.57
 4 -10 -1 12.95 1.42
 4 -10 0 301.34 7.53
 4 -10 0 289.92 6.98
 4 -10 1 24.51 1.96
 4 -10 1 25.02 2.2
 4 -10 1 22.27 1.94
 4 10 2 520.5 10.65
 4 -10 2 544.64 10.34
 4 10 3 29.5 2.97
 4 -10 3 27.36 2.71
 4 10 4 624.84 13.14
 4 10 5 0.99 0.5
 4 -10 5 2.59 1.17
 4 -10 6 131.88 6.72
 4 10 6 129.98 5.82
 4 -10 6 135.04 7.29
 4 -10 7 0.95 0.48
 4 -10 7 1.39 0.9
 4 -10 8 480.83 12.73
 4 -10 9 2.84 1
 4 -10 10 205.08 7.62
 4 -10 10 228.25 7.48
 4 -10 11 0.1 0.38
 -4 -11 11 13.75 1.81
 -4 -11 10 6.54 1.62
 4 -11 -10 7.41 1.23
 4 -11 -9 76.5 4.5
 -4 -11 9 79.11 6.51
 -4 -11 8 4.23 1.8
 4 -11 -8 5.53 1.45
 4 -11 -7 58.94 4.1
 4 -11 -7 61.84 4.65
 4 -11 -6 36.44 3.59
 4 -11 -6 39.04 3.78
 4 -11 -5 55.33 4.56
 4 -11 -5 51.41 4.33
 4 -11 -4 253.78 9.74
 4 -11 -4 250.1 9.32
 4 -11 -3 0.54 0.47
 4 -11 -3 0.99 0.37
 -4 -11 2 175.33 9.84
 4 -11 -2 143.28 7
 4 -11 -1 103.67 4.13
 4 -11 0 2.91 0.77
 4 -11 0 2.23 0.67
 4 -11 1 322.95 7.34
 4 -11 2 10.74 1.72
 4 -11 3 142.63 6.72
 4 11 3 163.02 7.07
 4 -11 4 666.23 15.19
 4 11 4 685.79 13.88
 4 -11 5 0.6 0.41
 4 11 5 1.01 0.56
 4 11 6 415.11 10.3
 4 -11 7 142.93 6.62
 4 -11 8 30.7 2.98
 4 -11 9 246.56 8.91
 4 -11 9 258.66 8.08
 4 -11 10 4.11 0.95
 4 -11 10 2.32 0.76
 -4 -12 10 -0.31 0.24
 4 -12 -10 0.23 0.2
 4 -12 -9 28.39 2.6
 -4 -12 9 25.01 3.31
 4 -12 -8 40.78 3.45
 -4 -12 8 37.4 4.53
 -4 -12 7 0.24 0.83
 4 -12 -7 0 0.48
 4 -12 -7 0.5 0.42
 4 -12 -6 6.04 1.44
 4 -12 -6 7.88 1.63
 4 -12 -5 257.31 9.75
 4 -12 -5 248.27 9.45
 4 -12 -4 5.32 1.47
 4 -12 -4 4.76 1.32
 4 -12 -3 354.25 11.42
 4 -12 -3 350.52 10.61
 4 -12 -2 2.84 1.05
 4 -12 -2 2.67 0.85
 4 -12 -1 71.35 5
 4 -12 0 21.89 2.37
 4 -12 0 17.47 2.43
 4 -12 1 41.87 3.39
 4 -12 1 37.77 3.57
 4 -12 2 0.58 0.3
 4 -12 3 503.79 12.78
 4 12 3 530.81 12.94
 4 -12 4 38.36 3.67
 4 12 4 38.51 3.26
 4 -12 5 286.5 10.29
 4 12 5 286.51 8.6
 4 -12 6 -0.32 0.63
 4 -12 7 183.42 8.21
 4 -12 8 4.41 1.1
 4 -12 9 7.3 1.39
 4 -12 10 0.19 0.26
 4 -13 -10 52.5 2.66
 -4 -13 10 52.19 3.27
 4 -13 -9 10.51 1.5
 -4 -13 9 9.14 1.67
 -4 -13 8 0.64 0.4
 4 -13 -8 0.98 0.73
 4 -13 -7 73.29 4.26
 4 -13 -7 81.87 4.95
 4 -13 -6 234.65 8.57
 4 -13 -6 244.1 8.89
 4 -13 -5 13.14 2.13
 4 -13 -5 13.14 2.04
 4 -13 -4 284.69 10.1
 4 -13 -4 273.65 9.56
 4 -13 -3 19.54 2.68
 4 -13 -3 18.9 2.38
 4 -13 -2 298.09 10.25
 4 -13 -2 292.73 9.17
 4 -13 -1 20.22 2.7
 4 -13 0 2.38 1.02
 4 -13 0 0.35 0.42
 4 -13 1 51.53 4.2
 4 -13 1 64.52 4.23
 4 -13 2 291.73 9.28
 4 13 3 28.69 3
 4 -13 3 27.28 2.92
 4 -13 4 469.69 12.58
 4 13 4 458.68 11.15
 4 -13 5 9.47 1.85
 4 13 5 8.71 1.49
 4 -13 6 208.57 8.56
 4 -13 7 12.68 2.02
 4 -13 8 46.32 3.67
 4 -13 9 50.2 3.39
 4 -14 -9 2.69 0.69
 4 -14 -8 166.4 6.02
 4 -14 -7 0.93 0.45
 4 -14 -7 1.28 0.77
 4 -14 -6 48.37 3.63
 4 -14 -6 50.76 3.8
 4 -14 -5 86.28 5.24
 4 -14 -5 83.31 4.99
 4 -14 -4 0.72 0.52
 4 -14 -4 0.23 0.45
 4 -14 -3 73.01 5
 4 -14 -3 65.92 4.38
 4 -14 -2 54.41 4.29
 4 -14 -1 115.76 6.23
 4 -14 0 457.77 12.45
 4 -14 1 0.47 0.26
 4 -14 1 2.58 1.1
 4 -14 2 508.28 12.46
 4 14 2 459.63 12.61
 4 -14 3 154.43 6.89
 4 14 3 148.14 6.62
 4 -14 4 15.63 2.29
 4 14 4 14.28 1.86
 4 -14 5 26.16 2.89
 -4 -14 -6 31.71 3.13
 4 -14 6 30.81 3.1
 4 -14 7 22.39 2.52
 4 -14 8 110.33 5.13
 4 -14 9 1.76 0.61
 4 -15 -9 75.57 3.1
 4 -15 -8 9.55 1.36
 4 -15 -7 186.72 5.79
 4 -15 -7 197.93 6.54
 4 -15 -6 1.46 0.59
 4 -15 -6 2.33 0.84
 4 -15 -5 26.49 2.75
 4 -15 -5 29.5 2.77
 4 -15 -4 2.1 0.85
 4 -15 -4 2.13 0.59
 4 -15 -3 1.44 0.66
 4 -15 -3 1.46 0.47
 4 -15 -2 4.49 1.18
 4 -15 -1 3.83 1.12
 4 -15 0 6.18 1.41
 4 -15 1 704.21 15.12
 4 -15 2 5.28 1.42
 4 15 2 3.13 1.07
 4 -15 3 322.3 9.94
 4 15 3 267.53 8.54
 4 -15 4 1.39 0.76
 4 15 4 0.62 0.42
 -4 -15 -5 0.25 0.24
 4 -15 5 2.5 0.97
 -4 -15 -6 10.2 1.65
 4 -15 6 10.67 1.72
 4 -15 7 67.95 4.07
 4 -15 8 6.22 1.14
 4 -16 -8 71.3 3.12
 4 -16 -7 24.15 1.87
 4 -16 -7 27.2 2.2
 4 -16 -6 36.52 2.65
 4 -16 -6 40.81 2.88
 4 -16 -5 53.16 3.53
 4 -16 -5 62.08 3.7
 4 -16 -4 -0.15 0.39
 4 -16 -4 0.12 0.25
 4 -16 -3 26.49 2.74
 4 -16 -3 29.45 2.58
 4 -16 -2 16.28 2.16
 4 -16 -1 49.46 3.77
 4 -16 0 108.97 5.62
 4 -16 1 11.35 1.85
 4 16 2 235.72 8.14
 4 -16 3 84.86 4.7
 4 16 3 62.06 3.81
 -4 -16 -4 55.08 4.53
 4 -16 4 59.45 3.93
 -4 -16 -5 115.45 5.95
 4 -16 5 121.22 5.6
 -4 -16 -6 25.01 2.37
 4 -16 6 24.47 2.4
 4 -16 7 76.47 3.82
 4 -17 -7 11.89 1.28
 4 -17 -6 89.41 3.63
 4 -17 -6 95.41 3.92
 4 -17 -5 3.72 0.85
 4 -17 -5 4.94 0.98
 4 -17 -4 147.21 5.67
 4 -17 -4 168.7 5.66
 4 -17 -3 1.86 0.58
 4 -17 -3 3.51 0.86
 4 -17 -2 137.3 5.85
 4 -17 -1 13.25 1.8
 -4 -17 1 7.59 1.76
 4 -17 0 5.48 1.18
 -4 -17 0 4.33 1.27
 -4 -17 -1 3.38 1.13
 4 17 1 3.6 0.99
 -4 -17 -2 70.85 5.48
 4 17 2 54.77 3.58
 -4 -17 -3 28.58 3.24
 4 17 3 21.21 2.01
 -4 -17 -4 258.81 9.07
 -4 -17 -5 1.05 0.52
 -4 -17 -6 323.23 7.53
 4 -18 -6 26.58 1.72
 4 -18 -6 30.47 1.89
 4 -18 -5 114.16 4.02
 4 -18 -5 122.2 4.12
 4 -18 -4 0.17 0.17
 4 -18 -4 0.41 0.21
 4 -18 -3 117.92 4.71
 4 -18 -2 18.92 1.96
 4 -18 -1 21.69 2.14
 -4 -18 1 17.81 2.36
 4 -18 0 106.48 4.85
 4 18 0 95.92 4.74
 -4 -18 -1 0.51 0.35
 4 18 1 0.79 0.4
 -4 -18 -2 34.95 3.42
 4 18 2 23.57 2.01
 -4 -18 -3 198.05 7.72
 -4 -18 -4 60.65 3.85
 -4 -18 -5 350.53 8.05
 4 -19 -4 63.87 2.85
 4 -19 -3 8.25 1.16
 4 -19 -2 42.93 2.64
 4 -19 -1 204.04 5.94
 4 19 -1 203.75 6.01
 4 -19 0 0.56 0.31
 -4 -19 0 0.4 0.21
 4 19 0 0.38 0.27
 -4 -19 -1 104.75 5.24
 4 19 1 128.3 4.28
 -4 -19 -2 14.08 1.86
 -4 -19 -3 99.63 4.63
 -5 0 13 0.36 0.2
 -5 0 12 -0.08 0.18
 -5 0 11 20.34 2.9
 -5 0 10 -0.28 0.52
 -5 0 9 158.03 8.99
 -5 0 8 0.18 0.79
 5 0 -8 -0.03 0.28
 5 0 -7 329.57 11.26
 -5 0 6 0.12 0.21
 -5 0 5 9.9 1.38
 -5 0 4 0.76 0.42
 -5 0 3 62.29 2.92
 -5 0 2 0.01 0.11
 -5 0 1 489.46 7.76
 5 0 -1 316.71 9.79
 -5 0 0 0.4 0.35
 5 0 0 0.27 0.33
 5 0 1 2213.46 19
 5 0 1 2088.97 26.3
 5 0 2 -0.35 0.37
 5 0 2 0.39 0.31
 -5 0 -3 223.7 7.52
 5 0 3 236.78 7.83
 5 0 4 -0.54 0.7
 5 0 5 1.45 0.56
 5 0 5 2.23 0.86
 5 0 6 -0.11 0.47
 5 0 6 0.9 0.87
 5 0 7 216.4 9.32
 5 0 8 0.54 0.74
 5 0 9 396.47 12.19
 5 0 10 0.33 0.27
 5 0 11 150.49 5.94
 -5 -1 13 6.23 1
 -5 1 13 5.29 0.92
 -5 -1 12 0.95 0.58
 -5 1 12 1.38 0.67
 -5 1 11 20.77 2.79
 -5 -1 11 20.55 2.89
 -5 1 11 20.38 2.88
 -5 -1 10 47.34 4.84
 -5 1 10 43.28 4.45
 -5 -1 9 8.94 2.21
 -5 1 9 9.71 2.29
 5 -1 -9 11.26 2.23
 -5 -1 8 128.72 8.21
 -5 1 8 117.13 7.36
 5 1 -8 116.79 7.24
 5 -1 -8 127.5 7.2
 5 -1 -7 9.48 1.7
 -5 -1 7 14.18 2.71
 5 1 -7 14.78 2.43
 5 -1 -7 13.26 2.29
 5 -1 -7 11.88 1.9
 -5 1 6 51.05 3.45
 -5 -1 5 216.07 7.21
 -5 1 5 177.58 5.43
 -5 -1 4 134.32 4.92
 -5 1 4 122.06 4.12
 -5 -1 3 264.03 6.44
 -5 1 3 229.13 5.2
 -5 1 2 58.26 2.66
 5 1 -2 50.8 3.92
 -5 -1 2 57.99 2.81
 -5 1 1 115.01 4.1
 -5 -1 1 105.45 3.64
 5 1 -1 89.19 4.91
 5 -1 -1 86.79 5.27
 -5 -1 0 716.7 10.12
 -5 1 0 473.96 10.67
 5 1 0 662.93 8.33
 5 1 0 627.39 13.86
 5 -1 0 536.61 12.47
 -5 -1 -1 1.04 0.45
 5 -1 1 0.19 0.38
 5 1 1 1.09 0.34
 5 1 1 0.56 0.52
 5 -1 1 0.11 0.34
 -5 -1 -2 533.48 8.61
 5 -1 2 544.67 10.88
 5 1 2 527.13 9.85
 -5 -1 -3 43.81 2.47
 5 -1 3 40.95 3.36
 5 1 3 35.82 2.86
 5 -1 4 12.44 2.06
 5 1 4 11.77 1.83
 5 -1 4 11.17 1.75
 5 1 5 39.6 3.82
 5 -1 5 47.46 3.76
 5 1 6 2.92 0.94
 5 1 6 3.32 1.1
 5 -1 6 2.12 0.91
 5 1 6 1.85 1
 5 -1 7 151.6 7.89
 5 1 7 154.63 7.73
 5 -1 8 156.02 7.99
 5 1 8 182.01 8.34
 5 1 9 10.37 1.93
 5 -1 9 10.66 2.02
 5 -1 10 203.1 8.16
 5 1 10 210.67 7.95
 5 -1 11 11.26 1.69
 -5 -2 13 0.14 0.24
 -5 2 13 0.15 0.22
 -5 -2 12 31.51 2.98
 -5 2 12 31.15 2.91
 -5 -2 12 32.03 3.07
 -5 2 11 2.56 0.94
 -5 -2 11 2.29 0.97
 -5 2 11 2.6 1.09
 -5 -2 10 90.97 6.84
 -5 2 10 90.06 6.29
 -5 -2 9 5.08 1.56
 -5 2 9 6.86 1.85
 5 -2 -9 5.71 1.37
 -5 -2 8 1.88 1.32
 -5 2 8 0.33 0.58
 5 -2 -8 0.33 0.45
 -5 -2 7 0.99 0.68
 5 -2 -7 2.19 0.91
 5 -2 -7 2.1 0.79
 -5 -2 6 36.87 3.35
 -5 -2 5 41.62 3.36
 -5 2 5 31.36 2.2
 -5 2 4 173.1 4.68
 -5 -2 4 209.13 6.85
 -5 -2 3 13.42 1.57
 -5 2 3 12.41 1.22
 -5 -2 2 413.24 8.21
 -5 2 2 418.47 7.54
 -5 -2 1 1.66 0.39
 -5 2 1 3.22 0.92
 -5 -2 0 124.14 4.03
 5 2 0 149.48 3.72
 5 2 0 152.45 6.7
 5 -2 0 125.83 6.28
 -5 -2 -1 265.11 5.95
 5 2 1 289.57 6.16
 5 2 1 280.13 9.2
 5 -2 1 272.66 9.55
 5 2 2 11.89 1.41
 5 -2 2 9.62 1.81
 5 2 3 0.98 0.44
 5 2 4 346.64 9.85
 5 -2 4 403.24 10.74
 5 -2 5 0.59 0.54
 5 2 5 0.71 0.21
 5 -2 6 326.86 11.56
 5 2 6 346.25 11.61
 5 2 7 70.99 5.28
 5 2 7 61.5 4.72
 5 -2 7 66.34 5.26
 5 -2 8 178.8 8.63
 5 -2 9 79.45 5.54
 5 -2 10 9.4 1.76
 5 -2 11 13.17 1.83
 -5 -3 13 21.16 1.74
 -5 -3 12 -0.29 0.25
 -5 3 12 -0.28 0.36
 -5 -3 11 34.22 3.67
 -5 3 11 34.41 3.61
 -5 -3 10 20.08 3.28
 -5 3 10 16.59 2.64
 -5 -3 9 24.31 3.76
 -5 3 9 22.15 3.15
 5 -3 -9 25.2 3.11
 -5 -3 8 28.94 4.09
 -5 3 8 27.97 3.47
 5 -3 -8 33.25 3.55
 5 -3 -8 26.6 2.94
 -5 -3 7 49.8 5.25
 5 3 -7 37.14 4.04
 5 -3 -7 48.32 4.2
 5 -3 -7 43.74 3.8
 -5 -3 6 14.69 2.29
 -5 3 5 206.33 5.29
 -5 -3 4 29.8 2.92
 -5 3 4 20.6 1.53
 -5 -3 3 100.35 4.77
 -5 3 3 93.64 3.3
 -5 3 2 31.26 2.76
 5 3 -2 27.85 2.81
 -5 -3 1 392.09 8.45
 5 3 -1 361.68 10.13
 -5 -3 0 143.11 4.87
 5 3 0 149.52 6.57
 5 -3 0 129.24 6.49
 -5 -3 -1 59.18 3.13
 5 3 1 56.13 2.58
 5 -3 1 58.88 4.52
 -5 -3 -2 281.99 6.69
 5 3 2 288.99 6.92
 5 3 3 415.64 9.23
 5 -3 3 427.93 10.78
 5 3 4 64.44 4.12
 5 -3 4 74.63 4.74
 5 3 5 532.75 13.23
 5 -3 5 633.38 14.32
 5 3 6 178.64 8.19
 5 3 6 163.07 7.9
 5 -3 6 178.41 8.57
 5 -3 7 850.84 19.11
 5 3 7 883.14 18.54
 5 3 7 831.81 18.07
 5 -3 8 66.78 5.27
 5 -3 9 118.24 6.75
 5 -3 10 12.03 1.97
 5 -3 11 63.11 4
 -5 -4 13 2.19 0.55
 -5 -4 12 16.18 1.99
 -5 4 12 16.51 1.89
 -5 -4 12 17.79 2.26
 -5 -4 11 17.9 2.61
 -5 4 11 16.39 2.4
 -5 -4 10 53.18 5.38
 -5 -4 10 49.71 4.94
 -5 -4 9 105.61 8.06
 -5 4 9 87.98 6.06
 5 -4 -9 93.77 5.83
 5 -4 -9 91.22 5.31
 -5 -4 8 2.52 1.12
 -5 4 8 4.35 1.49
 5 -4 -8 5.3 1.42
 5 -4 -8 4.76 1.23
 -5 -4 7 200.96 11.05
 5 -4 -7 181.72 7.93
 -5 -4 6 75.18 5.63
 -5 -4 5 126.11 6.63
 -5 -4 4 159.84 7.14
 -5 4 4 117.26 3.66
 -5 4 3 3.75 0.76
 -5 -4 3 3.43 1.02
 -5 -4 2 52.64 3.63
 -5 4 2 59.48 3.91
 5 -4 -2 52.52 2.78
 -5 -4 1 478.79 10.17
 5 4 -1 495.59 11.58
 5 4 0 1.82 0.45
 5 -4 0 2.19 0.56
 5 -4 0 1.31 0.61
 5 -4 1 1186.29 20.42
 5 -4 1 1146.65 11.57
 5 -4 2 72.12 2.78
 5 4 2 67.48 3.19
 5 -4 2 72.1 4.98
 5 4 3 326.11 8.22
 5 -4 3 329.71 9.64
 5 4 4 83.29 4.53
 5 -4 4 96.7 5.48
 5 -4 5 42.57 3.76
 5 -4 6 69.94 5.37
 5 4 6 70.62 5.05
 5 4 6 66.46 5.14
 5 4 7 142.23 7.29
 5 -4 7 130.56 7.4
 5 4 7 139.67 7.47
 5 -4 8 213.66 9.4
 5 -4 9 438.71 13
 5 -4 10 2.7 0.92
 5 -4 11 197.27 7
 -5 -5 12 1.1 0.62
 -5 -5 12 1.26 0.56
 -5 -5 11 0.87 0.58
 -5 5 11 0.83 0.5
 -5 -5 10 54.97 5.11
 -5 -5 9 1.47 0.83
 5 -5 -9 2.87 0.88
 5 -5 -9 4.22 1.23
 -5 -5 8 273.74 13.5
 -5 5 8 240.33 9.77
 5 -5 -8 266.41 9.67
 5 -5 -8 260.84 9.57
 -5 -5 7 13.85 3.02
 5 -5 -7 14.22 2.29
 -5 -5 6 242.11 12.16
 5 -5 -6 228.73 8.88
 -5 -5 5 32.38 3.8
 -5 5 4 56.71 2.76
 -5 -5 4 64.1 4.83
 -5 -5 3 1.7 0.81
 -5 5 3 1.67 0.69
 5 -5 -3 0.45 0.32
 -5 -5 2 99.48 5.65
 5 -5 -2 82.51 3.74
 5 -5 -1 1.62 0.5
 -5 -5 1 0.2 0.39
 5 5 -1 1.31 0.38
 -5 -5 0 714.68 13.96
 5 -5 0 756.12 8.62
 5 -5 0 714 16.3
 5 -5 1 0.74 0.34
 -5 -5 -1 -0.06 0.47
 5 5 1 0.07 0.15
 5 -5 1 -0.16 0.51
 5 -5 2 919.83 9.73
 5 -5 2 1005.76 19.05
 5 -5 3 4.23 0.66
 5 -5 3 2.55 0.95
 5 5 3 3.13 0.75
 5 -5 3 2.55 0.83
 5 5 4 89.61 4.75
 5 -5 4 102.12 5.76
 5 -5 5 3.89 1.13
 5 5 5 4.5 1.3
 5 5 5 5.46 1.39
 5 -5 6 220.83 9.52
 5 5 6 233.59 9.13
 5 5 6 233.64 9.88
 5 5 7 66.62 4.92
 5 -5 7 65.33 5.2
 5 5 8 378.16 11.31
 5 -5 8 371.17 12.3
 5 -5 9 4.75 1.32
 5 -5 10 337.08 10.29
 5 -5 11 4.23 1.04
 -5 -6 12 10.79 1.39
 -5 -6 12 11.43 1.67
 -5 -6 11 6.66 1.44
 -5 -6 11 8.4 1.91
 -5 -6 10 18.99 2.87
 5 -6 -10 18.56 2.11
 -5 -6 9 38.66 4.99
 -5 -6 9 32.98 4.23
 5 -6 -9 38.76 3.54
 -5 -6 8 10.22 2.72
 5 -6 -8 10.36 1.89
 5 -6 -8 10.62 2.03
 -5 -6 7 188.63 11.61
 5 -6 -7 182.18 8.27
 -5 -6 6 4.44 1.48
 5 -6 -6 7.7 1.79
 -5 -6 5 227.97 10.56
 -5 6 4 25.36 1.76
 -5 -6 4 37.27 4.2
 -5 6 3 5.01 1.29
 5 -6 -3 4.24 0.96
 5 -6 -2 223.57 5.42
 -5 -6 1 363.64 11.19
 5 -6 -1 468.77 6.95
 5 -6 0 16.48 1.29
 5 6 0 16.61 1.39
 5 -6 0 13.03 2.21
 5 -6 1 677.18 8.52
 5 -6 1 681.52 15.71
 5 6 2 122.35 4.61
 5 -6 2 110.89 6.34
 5 -6 3 335.14 5.89
 5 6 3 351.94 8.48
 5 -6 3 356.66 11.3
 5 -6 3 361.7 10.51
 5 6 4 76.04 4.45
 5 -6 4 82.25 5.23
 5 -6 5 1.15 0.58
 5 6 5 1.98 0.73
 5 6 5 2.61 1.02
 5 -6 6 307.75 11.09
 5 6 6 318.01 10.61
 5 6 6 328.27 12.04
 5 -6 7 208.03 9.16
 5 6 7 225.07 8.91
 5 6 8 24.68 2.84
 5 -6 8 24.51 3.05
 5 -6 9 109.69 6.2
 5 -6 10 1.57 0.64
 5 -6 11 89.57 4.37
 -5 -7 12 0.74 0.43
 -5 -7 12 0.58 0.25
 -5 -7 11 41.47 3.25
 -5 -7 11 50.51 4.26
 -5 -7 10 0.29 0.39
 5 -7 -10 0.44 0.43
 -5 -7 9 12.88 2.57
 5 -7 -9 15.86 2.27
 -5 -7 8 8.89 2.43
 5 -7 -8 7.98 1.55
 5 -7 -8 7.9 1.76
 -5 -7 7 55.09 6.42
 5 -7 -7 60.86 4.87
 -5 -7 6 75.66 7.47
 5 -7 -6 72.61 5.2
 5 -7 -5 175 7.72
 5 -7 -4 13.6 1.58
 -5 -7 4 11.48 2.47
 -5 7 3 639.19 13.87
 -5 -7 3 673.74 18.79
 5 -7 -2 5.26 0.82
 -5 -7 2 3.41 1.26
 5 -7 -1 189.28 4.59
 -5 -7 1 106.77 6.52
 5 -7 0 4.21 0.71
 -5 -7 0 4.04 1.22
 5 7 0 3.81 0.74
 5 -7 0 2.57 0.93
 5 -7 1 1.7 0.42
 5 7 1 1.52 0.5
 5 -7 1 1.42 0.69
 5 7 2 189.5 5.85
 5 -7 2 180.19 8.18
 5 -7 3 78.39 2.92
 5 7 3 98.63 4.69
 5 -7 4 23.75 2.85
 5 7 4 20.2 2.47
 5 7 4 21.7 3.07
 5 7 5 348.61 10.89
 5 -7 5 348.89 11.31
 5 -7 6 40.89 3.98
 5 7 6 47.78 4.06
 5 -7 7 267.81 10.17
 5 7 7 281.93 9.82
 5 -7 8 30.02 3.36
 5 7 8 33.99 3.17
 5 -7 9 10.34 1.8
 5 -7 10 2.19 0.81
 5 -7 11 18.06 1.88
 -5 -8 12 30.14 2.33
 -5 -8 11 5.32 1.34
 5 -8 -10 25.55 2.47
 -5 -8 10 26.98 3.68
 5 -8 -9 73.87 4.83
 5 -8 -8 0.86 0.71
 5 -8 -8 1.35 0.82
 -5 -8 7 19.35 3.85
 5 -8 -7 23.95 3.09
 5 -8 -6 209.38 8.29
 -5 -8 6 238.88 13.6
 5 -8 -6 225.75 9.25
 5 -8 -5 0.26 0.26
 5 -8 -5 2.14 1
 5 -8 -4 292.35 7.58
 5 -8 -3 22.38 1.84
 -5 -8 3 16.68 3.06
 5 -8 -2 188.19 4.76
 -5 -8 2 103.59 7.27
 5 -8 -1 92.29 3.41
 -5 -8 1 79.72 6.1
 5 -8 0 1.29 0.33
 5 8 0 2.76 0.66
 5 -8 0 1.69 0.74
 5 -8 1 73.8 3.13
 5 8 1 91.25 3.84
 5 -8 1 82.85 5.71
 5 -8 2 8.35 1.01
 5 8 2 13.99 1.65
 5 -8 2 12.39 2.17
 5 -8 3 14.52 1.31
 5 8 3 16.56 2.26
 5 -8 4 165.62 7.32
 5 8 4 166.65 7.17
 5 -8 5 1.99 0.91
 5 8 5 1.03 0.5
 5 -8 6 449.75 12.81
 5 8 6 485.25 12.9
 5 -8 7 2.32 0.9
 5 8 7 3.65 1.1
 5 -8 8 51.23 4.11
 5 8 8 47.41 3.65
 5 -8 9 50 3.79
 5 -8 10 13.5 1.77
 5 -8 11 11.5 1.41
 -5 -9 11 16.51 2.11
 5 -9 -10 36.3 2.83
 -5 -9 10 38.9 4.05
 -5 -9 9 6.08 1.96
 5 -9 -9 4.5 1.24
 5 -9 -8 171.47 7.88
 5 -9 -7 13.31 2.36
 5 -9 -6 107.55 6.02
 5 -9 -6 106.42 6.37
 5 -9 -5 52.21 4.32
 5 -9 -5 60.7 4.7
 5 -9 -4 1.18 0.58
 5 -9 -4 2.15 0.95
 5 -9 -3 110.39 6.18
 5 -9 -2 69.44 3.03
 -5 -9 2 53.01 5.52
 5 -9 -1 6.69 0.97
 -5 -9 1 5.97 1.88
 5 -9 0 255.26 5.94
 5 -9 0 251.75 10.21
 5 -9 1 9.33 1.15
 5 9 1 12.57 1.53
 5 9 2 116.34 6.03
 5 9 2 121.51 7.2
 5 -9 3 2.82 0.91
 5 -9 3 1.33 0.35
 5 9 3 1.79 0.74
 5 9 3 1.82 1.01
 5 -9 4 129.59 6.2
 5 9 4 139.76 6.67
 5 -9 4 135.97 6.46
 5 -9 5 267.15 9.33
 5 9 5 283.09 9.77
 5 9 6 24.24 2.82
 5 -9 6 19.75 2.55
 5 9 7 125.21 6.21
 5 -9 7 120.99 6.33
 5 9 8 153.06 6.28
 5 -9 8 145.58 6.65
 5 -9 9 14.33 1.88
 5 -9 9 16.49 2.05
 5 -9 10 187.03 6.02
 5 -9 10 194.75 6.41
 -5 -10 11 12.73 1.64
 -5 -10 10 -0.23 0.58
 5 -10 -10 -0.05 0.22
 5 -10 -9 109.42 5.54
 -5 -10 9 102.44 7.12
 5 -10 -8 9.97 1.93
 -5 -10 8 13.7 3.08
 5 -10 -7 138.86 7.15
 5 -10 -6 1.03 0.73
 5 -10 -6 1.6 0.98
 5 -10 -5 42.45 3.89
 5 -10 -5 44.42 4
 5 -10 -4 -0.01 0.4
 5 -10 -4 0.95 0.68
 5 -10 -3 7.52 1.62
 5 -10 -3 9.21 1.72
 5 -10 -2 51.45 4.11
 5 -10 -1 150.5 6.99
 5 -10 0 23.04 2.74
 5 -10 1 553.22 13.84
 5 10 2 7.82 1.89
 5 -10 2 4.72 1.1
 5 10 2 8.08 1.67
 5 -10 3 775.19 14.97
 5 10 3 724.35 15.53
 5 -10 4 0.14 0.49
 5 -10 4 1.33 0.69
 5 10 4 2.21 0.88
 5 -10 5 0.14 0.32
 5 -10 5 0.4 0.15
 5 10 5 0.75 0.46
 5 -10 6 1.59 0.54
 5 -10 6 2.8 0.98
 5 -10 7 216.43 7.91
 5 -10 7 214.96 8.16
 5 -10 8 3.78 0.92
 5 -10 8 4.58 1.12
 5 -10 9 167.38 6.27
 5 -10 9 175.14 6.3
 5 -10 10 0.66 0.31
 5 -10 10 0.7 0.46
 5 -11 -10 15.91 1.63
 -5 -11 10 15.11 1.99
 -5 -11 9 1.25 0.73
 5 -11 -9 1.85 0.74
 5 -11 -8 25.8 2.88
 -5 -11 8 23.8 3.6
 -5 -11 7 10.04 2.67
 5 -11 -7 8.76 1.6
 5 -11 -7 11.05 2.07
 5 -11 -6 147.22 6.89
 5 -11 -6 148.08 7.27
 5 -11 -5 82.52 5.33
 5 -11 -5 85.53 5.48
 5 -11 -4 2.25 0.83
 5 -11 -4 3.43 1.18
 5 -11 -3 139.48 6.92
 5 -11 -3 148.3 6.7
 5 -11 -2 27.92 3.08
 5 -11 -1 104.38 5.82
 5 -11 0 195.91 8.07
 5 -11 0 190.55 6.64
 5 -11 1 2.07 0.89
 5 -11 1 1.62 0.7
 5 -11 2 199.93 7.25
 5 11 2 214.8 8.58
 5 -11 3 344.42 9.85
 5 11 3 328.68 10.51
 5 -11 4 17.06 2.27
 5 11 4 19.29 2.5
 5 -11 5 474.17 12.22
 5 11 5 501.85 12.76
 5 -11 6 26.63 2.86
 5 11 6 33.51 3.19
 5 -11 6 29.08 2.8
 5 -11 7 128.24 5.71
 5 -11 7 124.08 6
 5 11 7 133.23 5.88
 5 -11 8 154.36 6.29
 5 -11 8 161.97 6.12
 5 -11 9 9.22 1.33
 5 -11 9 9.74 1.34
 5 -12 -10 34.34 2.17
 -5 -12 10 35 2.53
 -5 -12 9 6.62 1.39
 5 -12 -9 8.9 1.4
 5 -12 -8 45.93 3.6
 -5 -12 8 41.44 4.06
 5 -12 -7 4.42 1.13
 5 -12 -7 5.56 1.39
 5 -12 -6 102.53 5.57
 5 -12 -6 105.05 5.93
 5 -12 -5 29.63 3.12
 5 -12 -5 33.17 3.36
 5 -12 -4 313.18 10.31
 5 -12 -4 333.52 10.28
 5 -12 -3 1.43 0.59
 5 -12 -3 2.3 0.95
 5 -12 -2 191.62 7.91
 5 -12 -1 -0.01 0.46
 5 -12 0 67.21 4.68
 5 -12 1 2.69 0.98
 5 -12 1 1.01 0.62
 5 -12 2 192.24 7.17
 5 12 2 202.64 8.34
 5 -12 3 23.31 2.55
 5 12 3 22.78 2.77
 5 -12 4 285.91 9.04
 5 12 4 293.99 9.6
 5 -12 5 8.08 1.52
 5 12 5 8.76 1.66
 5 -12 6 352.03 10.01
 5 12 6 382.36 10.33
 5 -12 7 2.39 0.81
 5 -12 8 117.27 5.05
 5 -12 9 3.17 0.72
 5 -13 -9 25.96 2.13
 5 -13 -8 74.42 4.19
 5 -13 -7 22.62 2.31
 5 -13 -7 21.43 2.49
 5 -13 -6 20.11 2.4
 5 -13 -6 23.56 2.68
 5 -13 -5 228.67 8.37
 5 -13 -5 246.2 8.64
 5 -13 -4 4.77 1.27
 5 -13 -4 5.68 1.4
 5 -13 -3 410.8 11.56
 5 -13 -3 463.1 11.4
 5 -13 -2 0.75 0.24
 5 -13 -1 69.44 4.67
 5 -13 0 74.22 4.87
 5 -13 1 1.59 0.75
 5 -13 1 2.65 1.04
 5 -13 2 23.88 2.52
 5 13 2 23.03 2.84
 5 -13 3 325.78 9.35
 5 13 3 302.89 9.83
 5 -13 4 9.09 1.61
 5 13 4 8.27 1.59
 5 -13 5 318.06 9.14
 5 13 5 334.81 9.81
 5 -13 6 7.35 1.36
 5 13 6 8.64 1.45
 5 -13 7 170.65 6.14
 5 -13 8 36.86 2.56
 5 -14 -9 88.42 3.41
 5 -14 -8 13.78 1.67
 5 -14 -7 82.19 3.89
 5 -14 -7 85.5 4.48
 5 -14 -6 6.85 1.35
 5 -14 -6 7.29 1.43
 5 -14 -5 12.92 1.91
 5 -14 -5 14.71 2
 5 -14 -4 109.82 5.73
 5 -14 -4 117.47 5.61
 5 -14 -3 4.48 1.21
 5 -14 -3 7.89 1.53
 5 -14 -2 116.55 5.91
 5 -14 -1 233.52 8.37
 5 -14 0 67.75 4.54
 5 -14 1 442.63 11.78
 5 14 1 427.82 12.07
 5 -14 2 9.18 1.56
 5 14 2 8.26 1.65
 5 -14 3 87.23 4.67
 5 14 3 73.96 4.67
 5 -14 4 30.39 2.76
 5 14 4 34.11 3.11
 5 -14 5 8.48 1.42
 5 14 5 8.12 1.45
 -5 -14 -6 98.15 5.24
 5 -14 6 87.96 4.35
 5 -14 7 24.17 2.11
 5 -15 -8 110.27 4.01
 5 -15 -7 6.03 0.97
 5 -15 -7 7.06 1.18
 5 -15 -6 90.59 4.27
 5 -15 -6 93.23 4.5
 5 -15 -5 1.99 0.77
 5 -15 -5 2.09 0.77
 5 -15 -4 4.87 1.19
 5 -15 -4 5.89 1.23
 5 -15 -3 1.39 0.62
 5 -15 -3 2.57 0.86
 5 -15 -2 3.27 0.91
 5 -15 -1 10.08 1.69
 5 -15 0 264.75 8.62
 5 -15 1 19.35 2.42
 5 15 1 19.97 2.49
 5 15 2 319.69 9.66
 5 -15 3 10.65 1.6
 5 15 3 8.17 1.52
 5 -15 4 44.69 3.1
 5 15 4 43.5 3.32
 -5 -15 -5 -0.19 0.69
 5 -15 5 0.45 0.36
 5 15 5 0.78 0.37
 -5 -15 -6 1.62 0.59
 5 -15 6 1.53 0.6
 5 -15 7 2.21 0.69
 5 -16 -7 30.05 1.8
 5 -16 -7 32.44 2.14
 5 -16 -6 40.76 2.53
 5 -16 -6 40.48 2.64
 5 -16 -5 17.19 1.88
 5 -16 -5 16.93 1.8
 5 -16 -4 67.83 3.86
 5 -16 -4 68.93 3.66
 5 -16 -3 4.14 1.01
 5 -16 -2 63.69 3.93
 5 -16 -1 77.33 4.35
 5 -16 0 62.14 3.97
 5 16 0 70.55 4.42
 5 -16 1 157.58 6.24
 5 16 1 138.58 6.11
 5 16 2 38.09 3.09
 5 16 3 82.39 4.41
 -5 -16 -4 109.47 6.05
 5 16 4 99.3 4.56
 -5 -16 -5 1.91 0.66
 5 -17 -6 2.22 0.54
 5 -17 -6 2.36 0.58
 5 -17 -5 148.67 4.69
 5 -17 -5 141.38 4.51
 5 -17 -4 0.55 0.39
 5 -17 -4 0.84 0.36
 5 -17 -3 230.3 6.68
 5 -17 -2 4.61 1.03
 5 -17 -1 54.53 3.4
 -5 -17 1 53.41 4.26
 5 -17 0 13.47 1.68
 5 17 0 15.47 1.89
 -5 -17 -1 -0.49 0.8
 5 17 1 0.42 0.37
 -5 -17 -2 9.14 1.76
 5 17 2 9.82 1.42
 -5 -17 -3 123.43 6.24
 5 17 3 109.91 4.6
 -5 -17 -4 11.21 1.69
 -5 -17 -5 306.38 7.62
 5 -18 -5 6.58 0.87
 5 -18 -4 139.17 4.27
 5 -18 -3 6.73 1.03
 5 -18 -2 76.4 3.56
 5 18 -2 92.4 3.95
 5 -18 -1 26.36 2.11
 -5 -18 1 27.42 2.45
 5 18 -1 29.85 2.29
 -5 -18 0 19.92 2.33
 5 -18 0 22.13 1.91
 5 18 0 21.29 1.96
 -5 -18 -1 10.6 1.72
 5 18 1 17.5 1.72
 -5 -18 -2 27.29 2.68
 5 18 2 31.18 2.23
 -5 -18 -3 71.57 4.03
 5 19 -2 80.36 3.02
 5 19 -1 6.59 0.9
 5 19 0 93.49 3.37
 -6 0 12 1.28 0.54
 -6 0 11 -0.24 0.45
 -6 0 11 0.1 0.24
 -6 0 10 31.02 3.48
 -6 0 9 0.05 0.29
 -6 0 8 284.51 11.32
 6 0 -8 289.94 10.85
 6 0 -7 -0.22 0.32
 6 0 -6 72.3 5.13
 -6 0 5 0.2 0.34
 -6 0 4 0.69 0.43
 -6 0 3 0.75 0.43
 -6 0 2 52.7 2.81
 6 0 -2 70.71 5.2
 -6 0 1 0.31 0.18
 6 0 -1 0.27 0.37
 -6 0 0 1029.43 13.35
 6 0 0 883.16 19.85
 -6 0 -1 0.67 0.33
 6 0 1 0.4 0.41
 -6 0 -2 463.1 8.5
 6 0 3 -0.14 0.51
 6 0 4 67.31 4.96
 6 0 5 0.15 0.39
 6 0 5 0.25 0.22
 6 0 5 0.15 0.71
 6 0 6 146.9 7.43
 6 0 6 171.24 8.36
 6 0 7 0.22 0.17
 6 0 8 194.92 8.08
 6 0 9 0.48 0.4
 6 0 10 210.9 7.02
 -6 -1 12 6.39 1.14
 -6 1 12 6.53 1.16
 -6 1 11 2.26 0.82
 -6 -1 11 2.52 0.83
 -6 1 11 3.01 0.98
 -6 -1 10 15.77 2.54
 -6 1 10 12.57 2.2
 -6 -1 9 89.62 6.36
 -6 1 9 85.08 5.91
 6 -1 -9 92.74 5.9
 -6 -1 8 2.47 1.23
 -6 1 8 2.47 1.15
 6 1 -8 1.91 0.75
 6 -1 -8 2.55 1.03
 -6 -1 7 88.5 6.32
 6 1 -7 84.7 5.88
 6 -1 -7 93.89 5.96
 6 1 -6 176.41 8.17
 6 -1 -6 192.55 8.38
 -6 -1 5 101.56 5.18
 -6 1 5 85.34 4.04
 -6 -1 4 97.05 4.45
 -6 1 4 87.84 3.88
 -6 -1 3 4.55 0.96
 -6 1 3 4.3 0.79
 6 1 -3 6.92 1.66
 -6 -1 2 29.1 2.27
 -6 1 2 30.27 2.09
 6 1 -2 26.34 3.12
 6 -1 -2 30.6 3.54
 -6 -1 1 138.81 4.66
 6 1 -1 137.45 7.53
 6 -1 -1 132.54 7.06
 -6 -1 0 25.29 1.94
 -6 1 0 28.85 2.18
 6 1 0 25.68 3.28
 6 -1 0 22.36 3.17
 -6 -1 -1 399.25 7.74
 -6 1 -1 412.57 8.96
 6 1 1 430.61 13.75
 6 -1 1 428.92 13.77
 -6 -1 -2 9.51 1.21
 -6 1 -2 11.74 1.76
 6 1 2 7.87 1.29
 -6 1 -3 144.09 6.08
 6 1 3 156.09 6.65
 6 -1 4 99.95 6.03
 6 1 4 92.06 5.65
 6 1 5 3.17 1.43
 6 -1 5 2.13 0.94
 6 1 5 3.02 1.05
 6 -1 5 3.34 1.15
 6 1 5 2.86 1.01
 6 1 6 105.71 6.12
 6 -1 6 106.66 6.42
 6 1 6 101.04 6.98
 6 1 6 101.07 6.53
 6 -1 7 60.52 4.75
 6 1 7 61.89 4.6
 6 1 7 62.32 4.87
 6 1 8 33.26 3.25
 6 -1 8 32.22 3.34
 6 1 9 195.47 7.34
 6 -1 9 180.37 7.3
 6 -1 10 1.09 0.6
 -6 -2 12 0.52 0.34
 -6 -2 12 0.23 0.2
 -6 2 12 0.13 0.1
 -6 2 11 34.01 3.02
 -6 -2 11 35.13 3.25
 -6 2 11 36.41 3.25
 -6 -2 10 6.26 1.61
 -6 2 10 6.12 1.45
 -6 -2 9 19.45 3.02
 -6 2 9 21.63 2.98
 6 -2 -9 21 2.75
 -6 -2 8 13.47 2.58
 -6 2 8 10.51 2.06
 6 -2 -8 11 1.99
 -6 -2 7 8.23 2.02
 6 2 -7 5.98 1.56
 6 -2 -7 7.42 1.71
 6 2 -6 50.57 4.47
 6 -2 -6 53.46 4.41
 6 -2 -6 49.33 4.08
 -6 -2 5 149.45 6.61
 -6 2 5 130.59 4.88
 -6 -2 4 8.28 1.42
 -6 2 4 7.79 1.11
 -6 -2 3 195.37 6.44
 -6 2 3 187.9 5.23
 -6 -2 2 4.75 1.01
 -6 2 2 4.51 0.93
 6 2 -2 4.31 1.32
 -6 -2 1 91.35 4.06
 -6 2 1 100.07 4.1
 6 -2 -1 89.71 6.07
 -6 -2 0 275.09 6.93
 -6 2 0 287.95 8.73
 6 2 0 267.56 10.63
 -6 -2 -1 56.42 3.08
 -6 2 -1 54.45 4.19
 -6 -2 -2 15.32 1.57
 -6 2 -2 21.04 2.67
 6 2 2 19.37 2.07
 6 -2 2 16.45 2.76
 6 2 3 330.57 9.37
 6 2 4 6.56 1.83
 6 -2 4 6.01 1.54
 6 2 4 2.88 1.07
 6 -2 5 362.05 11.91
 6 2 5 374.83 11.14
 6 2 5 373.61 13.23
 6 2 6 0.79 0.66
 6 -2 6 2.21 0.95
 6 2 6 0.86 0.66
 6 -2 7 201.86 8.77
 6 2 7 209.21 9.14
 6 -2 8 55.17 4.37
 6 -2 9 22.59 2.58
 6 -2 10 18.31 2.1
 -6 -3 12 19.2 1.89
 -6 3 12 19.55 1.82
 -6 -3 12 21.29 2.09
 -6 3 11 -0.18 0.18
 -6 -3 11 0.81 0.61
 -6 3 11 0.55 0.42
 -6 -3 10 26.24 3.27
 -6 3 10 22.14 2.7
 -6 -3 9 4.41 1.57
 -6 3 9 4.86 1.31
 6 -3 -9 5.24 1.24
 -6 -3 8 1.07 0.87
 -6 3 8 1.49 0.97
 6 -3 -8 1.88 0.74
 -6 -3 7 21.58 3.28
 6 -3 -7 23.85 2.94
 6 -3 -7 20.62 2.68
 6 3 -6 151.84 7.98
 6 -3 -6 166.75 7.68
 -6 3 5 21.25 1.93
 6 3 -5 27.34 3.24
 6 -3 -5 33.06 3.35
 -6 -3 4 139.08 6.55
 -6 3 4 105.13 4.05
 -6 -3 3 0.28 0.26
 -6 3 3 0.41 0.31
 -6 -3 2 235.43 7.27
 -6 3 2 262.62 6.52
 -6 -3 1 0.53 0.38
 6 3 -1 -0.16 0.39
 6 -3 -1 -0.2 0.42
 -6 -3 0 20.12 2.01
 -6 3 0 24.46 3
 6 -3 0 19.03 2.94
 -6 -3 -1 156.25 5.54
 6 3 1 171.24 5.09
 6 -3 1 165.07 8.84
 6 3 2 152.07 5.45
 6 -3 2 143.59 8.25
 6 3 3 268.27 8.4
 6 -3 4 421.8 12.69
 6 3 4 423.73 14.55
 6 -3 5 116.11 6.77
 6 3 5 100.87 6.59
 6 3 5 122.86 7.65
 6 3 6 847.68 19.82
 6 3 6 890.73 20.21
 6 -3 6 880.91 18.91
 6 -3 7 27.44 3.26
 6 3 7 25.73 3.37
 6 3 7 26.2 3.28
 6 -3 8 375.92 11.48
 6 -3 9 10.13 1.72
 6 -3 10 2.3 0.75
 6 -3 11 86.28 3.89
 -6 -4 12 0.48 0.24
 -6 -4 12 0.61 0.34
 -6 4 12 0.48 0.26
 -6 -4 11 28.7 2.77
 -6 4 11 26.99 2.61
 -6 -4 10 4.61 1.36
 -6 4 10 5.7 1.33
 -6 -4 10 5.95 1.52
 -6 -4 9 18 2.97
 -6 4 9 18.34 2.55
 6 -4 -9 19.07 2.5
 -6 -4 8 112.64 7.75
 -6 4 8 99.72 6.13
 6 -4 -8 106.15 6.06
 6 -4 -8 106.1 6
 -6 -4 7 1.96 1.08
 6 -4 -7 3.38 1.19
 6 -4 -7 2.68 0.97
 -6 -4 6 201.52 10.23
 6 -4 -6 189 8.31
 -6 -4 5 141.75 8.25
 6 -4 -5 122.71 5.86
 6 -4 -5 128.83 6.73
 -6 -4 4 45.75 3.93
 -6 4 4 33.41 2.19
 -6 -4 3 78.53 5.07
 -6 4 3 81.61 3.81
 -6 -4 2 31.64 3.02
 -6 4 2 37.38 2.85
 -6 -4 1 118.91 5.58
 -6 4 1 119 6.57
 6 -4 -1 115.75 7.08
 -6 -4 0 429.43 10.09
 6 -4 0 346.17 12.23
 -6 -4 -1 3.61 0.9
 6 4 1 5.86 1.01
 6 -4 1 4.06 1.43
 6 4 2 739.34 12.13
 6 -4 2 731.96 18.69
 6 4 3 31.65 2.76
 6 -4 4 247.3 9.64
 6 4 4 241.97 11.03
 6 4 5 23.36 3.17
 6 -4 5 27.38 3.28
 6 4 5 25.03 3.52
 6 -4 6 1.54 0.85
 6 4 6 1.65 1.04
 6 4 6 1.21 0.79
 6 -4 7 418.89 12.57
 6 4 7 455.98 14.08
 6 -4 8 192.7 8.09
 6 -4 9 18.01 2.26
 6 -4 10 283 8.14
 -6 -5 12 0.1 0.27
 -6 -5 12 0.19 0.19
 -6 -5 11 1.88 0.75
 -6 5 11 2.56 0.77
 -6 -5 10 0.11 0.22
 -6 -5 9 66.79 5.78
 -6 5 9 58.35 4.42
 6 -5 -9 65.87 4.45
 -6 5 8 8.15 1.75
 -6 -5 8 9.12 2.25
 6 -5 -8 7.97 1.68
 6 -5 -8 8.36 1.74
 -6 -5 7 149.81 9.25
 6 -5 -7 152.45 7.58
 -6 -5 6 1.25 0.98
 6 -5 -6 0.83 0.83
 6 -5 -5 150.83 6.77
 -6 -5 5 160.26 9.21
 6 -5 -5 157.01 7.58
 -6 5 4 3.12 0.68
 -6 -5 3 9.95 1.86
 -6 5 3 9.76 1.31
 -6 -5 2 2.11 0.79
 -6 5 2 3.33 1.09
 6 -5 -1 314.28 7.97
 -6 -5 1 288.83 10.04
 -6 -5 0 4.29 1.17
 6 -5 0 3.97 1.36
 6 -5 0 5.45 1.13
 6 5 1 904.24 11.82
 6 -5 1 896.54 21.08
 6 -5 2 -0.09 0.17
 6 5 2 0.79 0.44
 6 -5 2 -0.37 0.65
 6 -5 3 382.78 11.57
 6 5 3 383.81 14.08
 6 5 4 2.63 1.21
 6 -5 4 3.17 1.06
 6 5 4 2.54 1.19
 6 -5 5 1.04 0.82
 6 5 5 0.93 0.76
 6 5 5 0.77 0.31
 6 5 6 11.3 2.22
 6 5 6 12.82 2.47
 6 -5 6 10.23 2
 6 -5 7 99.18 6.01
 6 5 7 119.38 7.04
 6 -5 8 5.61 1.31
 6 -5 9 300.11 9.15
 6 -5 10 5.42 1.11
 -6 -6 12 0.77 0.39
 -6 -6 11 11.93 1.59
 -6 -6 11 16.55 2.21
 -6 -6 10 5.08 1.23
 -6 -6 9 1.38 0.94
 -6 -6 9 0.97 0.71
 6 -6 -9 1.21 0.66
 6 -6 -9 0.31 0.4
 -6 -6 8 46.04 5.11
 -6 6 8 41.74 3.78
 6 -6 -8 46.13 3.82
 6 -6 -8 47.46 4.1
 -6 -6 7 53.43 5.7
 6 -6 -7 54.32 4.63
 -6 -6 6 199.75 10.99
 6 -6 -6 191.6 8.62
 6 -6 -5 10.05 1.92
 -6 -6 5 16.32 3.05
 6 -6 -5 12.03 2.14
 6 -6 -4 114.38 6.03
 6 -6 -4 106.77 6.13
 -6 6 3 92.11 4.23
 -6 6 2 18.33 2.84
 -6 -6 1 17.06 2.53
 6 -6 -1 8 1.4
 6 -6 -1 13.2 2.51
 6 -6 0 336.06 8.84
 6 -6 0 308.69 11.98
 6 -6 1 32.79 2.64
 6 6 1 41.32 2.59
 6 -6 1 41.21 4.57
 6 -6 2 364.22 11.06
 6 6 2 344.95 9.89
 6 6 2 372.5 13.88
 6 6 3 85.44 5.3
 6 -6 3 95.5 5.75
 6 6 3 95.47 7.04
 6 6 4 90.39 6.82
 6 -6 4 87.77 5.63
 6 -6 5 244.04 9.5
 6 6 5 222.04 9.58
 6 6 5 254.97 11.4
 6 -6 6 26.93 3.15
 6 6 6 31.51 3.61
 6 6 6 35.79 4.16
 6 -6 7 57 4.46
 6 6 7 63.52 5.06
 6 -6 8 78.02 4.9
 6 -6 9 15.8 2.03
 6 -6 10 136.37 5.34
 -6 -7 11 0.41 0.47
 -6 -7 10 27.23 2.68
 -6 -7 9 0.21 0.41
 6 -7 -9 0.64 0.42
 6 -7 -9 0.11 0.29
 -6 -7 8 0.56 0.85
 6 -7 -8 0.67 0.5
 6 -7 -8 0.45 0.57
 -6 -7 7 3.98 1.23
 6 -7 -7 4.96 1.52
 6 -7 -6 143.33 6.72
 -6 -7 6 152.95 9.87
 6 -7 -6 153.56 7.83
 6 -7 -5 21.14 2.73
 -6 -7 5 22.61 3.69
 6 -7 -5 22.05 2.91
 6 -7 -4 436.74 12.29
 6 -7 -4 425.58 12.32
 6 -7 -3 0.56 0.81
 6 -7 -3 1.29 0.82
 6 -7 -2 364.9 10.97
 -6 -7 1 11.94 2.36
 6 -7 1 92.98 5.78
 6 7 1 88.22 4.85
 6 -7 1 76.88 5.03
 6 7 1 75.06 6.16
 6 -7 2 48.82 4.25
 6 7 2 48.31 3.75
 6 7 2 52.17 5.18
 6 -7 2 43.73 3.83
 6 -7 3 22.82 2.82
 6 7 3 21.4 2.62
 6 -7 4 228.23 8.89
 6 7 4 247.52 11.37
 6 -7 5 0.91 0.71
 6 7 5 1.03 0.75
 6 -7 6 391.45 11.57
 6 7 6 428.26 13.16
 6 -7 7 25.41 2.84
 6 7 7 28.99 3.31
 6 -7 8 76.41 4.65
 6 -7 9 6.33 1.23
 6 -7 10 0.99 0.39
 -6 -8 11 37.14 2.8
 -6 -8 10 18 2.49
 6 -8 -9 12.43 1.66
 6 -8 -9 12.55 1.89
 6 -8 -8 52.32 3.83
 6 -8 -8 55.52 4.42
 -6 -8 7 18.35 3.36
 6 -8 -7 18.41 2.76
 6 -8 -6 28.86 3.13
 -6 -8 6 29.67 4.37
 6 -8 -6 27.43 3.35
 6 -8 -5 347.58 11.1
 6 -8 -5 327.39 11.2
 6 -8 -4 33.81 3.54
 6 -8 -4 33.75 3.49
 6 -8 -3 208.67 8.58
 6 -8 -3 208.03 8.33
 6 -8 -2 1.41 0.93
 6 -8 -1 54.46 4.35
 6 -8 0 168.83 7.73
 6 8 0 162.44 6.56
 6 -8 1 10.51 1.99
 6 8 1 7.35 1.88
 6 -8 1 6.97 1.53
 6 8 1 9.04 1.62
 6 8 2 60.15 4.25
 6 8 2 58.41 5.5
 6 -8 2 70.02 5.1
 6 -8 2 60.67 4.48
 6 8 3 49.3 4.04
 6 8 3 60.16 5.58
 6 -8 3 50.78 4.11
 6 -8 4 3.51 1.09
 6 8 4 3.53 1.14
 6 8 4 5.93 1.74
 6 -8 5 410.07 11.68
 6 8 5 416.85 12.92
 6 -8 6 2.1 0.91
 6 8 6 3.18 1.22
 6 8 7 179.35 8.03
 6 -8 7 155.3 6.76
 6 -8 8 34.32 2.99
 6 -8 9 3.61 0.92
 6 -8 10 17.12 1.7
 -6 -9 11 5.3 0.95
 -6 -9 10 15.45 2.09
 6 -9 -9 35.13 3.04
 -6 -9 9 34.28 3.76
 6 -9 -8 1.44 0.71
 6 -9 -8 0.82 0.63
 6 -9 -7 266.44 10.02
 6 -9 -6 6.39 1.53
 6 -9 -6 5.88 1.53
 6 -9 -5 55.88 4.44
 6 -9 -5 51.89 4.41
 6 -9 -4 192.36 8.27
 6 -9 -4 184.16 8.06
 6 -9 -3 27.63 3.14
 6 -9 -3 27.94 3.05
 6 -9 -2 35.53 3.56
 6 -9 -1 71.15 5.03
 6 -9 0 5.66 1.49
 6 9 0 4.98 1.25
 6 -9 1 237.99 9.38
 6 9 1 224.31 8.05
 6 -9 2 45.91 4.14
 6 9 2 42.96 3.69
 6 -9 2 39.65 3.58
 6 9 2 40.4 4.57
 6 -9 3 152.27 6.98
 6 9 3 135.03 6.76
 6 9 3 158.16 9.13
 6 9 4 140.95 7.3
 6 -9 4 154.16 6.97
 6 -9 5 3.68 1.11
 6 9 5 3.2 1.06
 6 -9 6 151.65 6.68
 6 9 6 174.06 8
 6 -9 7 66.53 4.24
 6 9 7 70.37 4.82
 6 -9 8 44.48 3.24
 6 -9 9 184.45 6.07
 -6 -10 10 28.14 2.49
 -6 -10 9 1.57 0.81
 6 -10 -9 0.52 0.23
 6 -10 -8 49.68 3.33
 6 -10 -8 53.13 4.05
 -6 -10 8 52.49 4.86
 6 -10 -7 -0.09 0.27
 6 -10 -7 0.5 0.73
 6 -10 -6 191.76 7.83
 6 -10 -6 195.32 8.54
 6 -10 -5 3.23 1.07
 6 -10 -5 1.59 0.65
 6 -10 -4 5.63 1.48
 6 -10 -4 4.89 1.4
 6 -10 -3 0.25 0.41
 6 -10 -3 0.29 0.41
 6 -10 -2 91.48 5.68
 6 -10 -1 42.69 3.85
 6 -10 0 247.98 9.27
 6 10 0 252.7 8.57
 6 -10 1 12.75 2.18
 6 10 1 14.77 2.12
 6 10 2 876.71 16.87
 6 10 2 777.58 20.17
 6 -10 3 1.47 0.71
 6 10 3 0.76 0.44
 6 10 4 51.31 4.32
 6 -10 4 61.72 4.3
 6 -10 5 1.8 0.75
 6 10 5 3.1 1.05
 6 -10 6 64.07 4.16
 6 10 6 68.29 4.84
 6 -10 7 0.64 0.42
 6 10 7 0.08 0.26
 6 -10 8 102.39 4.7
 6 -10 9 3.04 0.76
 -6 -11 9 4.37 1.04
 6 -11 -9 5.02 1.03
 6 -11 -8 -0.1 0.16
 6 -11 -8 -0.16 0.39
 6 -11 -7 77.01 4.27
 6 -11 -7 76.92 4.96
 6 -11 -6 21.73 2.59
 6 -11 -6 20.18 2.66
 6 -11 -5 53.06 4.23
 6 -11 -5 45.66 3.94
 6 -11 -4 89.79 5.53
 6 -11 -4 91.51 5.46
 6 -11 -3 10.14 1.96
 6 -11 -3 12.11 1.95
 6 -11 -2 84.59 5.36
 6 -11 -1 188.61 7.91
 6 -11 0 161.63 7.38
 6 11 0 167.04 7
 6 -11 1 188.21 8.11
 6 11 1 180.63 7.4
 6 11 2 98.75 5.61
 6 11 3 74.2 4.97
 6 11 4 319.67 10.66
 6 -11 5 0.69 0.2
 6 11 5 0.82 0.76
 6 11 6 209.12 8.16
 6 -11 6 211.55 7.25
 6 -11 7 70.72 3.96
 6 11 7 70.58 4.32
 6 -11 8 91.88 4.18
 6 -12 -9 47.4 2.75
 6 -12 -8 1.35 0.61
 6 -12 -7 0.9 0.47
 6 -12 -7 1.49 0.71
 6 -12 -6 7.47 1.5
 6 -12 -6 8.94 1.65
 6 -12 -5 130.79 6.32
 6 -12 -5 121.77 6.14
 6 -12 -4 9.09 1.83
 6 -12 -4 11.54 1.93
 6 -12 -3 269.15 9.27
 6 -12 -3 266.67 8.76
 6 -12 -2 11.05 2.05
 6 -12 -1 206.58 8.09
 6 -12 0 5.72 1.44
 6 12 0 7.59 1.58
 6 -12 1 0.34 0.32
 6 12 1 0.28 0.43
 6 12 2 13.57 2.06
 6 12 3 84.96 5.21
 6 12 4 2.64 0.99
 6 -12 5 360.39 8.44
 6 12 5 377.58 11.08
 6 -12 6 4.25 0.89
 6 12 6 5.24 1.22
 6 12 7 322.34 8.38
 6 -13 -8 0.09 0.26
 6 -13 -7 27.73 2.17
 6 -13 -7 32.25 2.72
 6 -13 -6 21.33 2.29
 6 -13 -6 20.39 2.32
 6 -13 -5 0.81 0.58
 6 -13 -5 0.4 0.38
 6 -13 -4 245.19 8.53
 6 -13 -4 222.69 7.74
 6 -13 -3 -0.11 0.2
 6 -13 -2 249.93 8.71
 6 -13 -1 14.94 2.13
 6 -13 0 37.32 3.35
 6 13 0 39.69 3.38
 6 -13 1 32.78 3.14
 6 13 1 33.43 3.13
 6 13 2 29.51 2.94
 6 -13 3 23.56 2.15
 6 13 3 20.21 2.48
 6 -13 4 197.38 5.99
 6 13 4 188.81 7.64
 6 -13 5 24.24 2.05
 6 13 5 22.68 2.54
 6 -13 6 269.61 6.26
 6 13 6 286.61 8.34
 6 -14 -8 44.56 2.45
 6 -14 -7 -0.13 0.12
 6 -14 -7 -0.07 0.13
 6 -14 -6 41.11 2.87
 6 -14 -6 39.92 2.91
 6 -14 -5 4.13 1.1
 6 -14 -5 3.76 0.97
 6 -14 -4 7.07 1.45
 6 -14 -4 6.76 1.27
 6 -14 -3 83.33 4.74
 6 -14 -2 118.2 5.68
 6 -14 -1 136.04 6.06
 6 14 -1 151.3 6.23
 6 -14 0 257.9 8.36
 6 14 0 277.72 8.59
 6 -14 1 8.22 1.48
 6 14 1 9.82 1.67
 6 14 2 108.88 5.42
 6 14 3 0.88 0.58
 6 14 4 42.77 3.42
 6 -14 5 77.88 3.29
 6 14 5 83.14 4.51
 -6 -14 -6 0.41 0.31
 6 14 6 0.98 0.44
 6 -15 -7 61.31 2.82
 6 -15 -6 4.75 0.86
 6 -15 -6 4.31 0.82
 6 -15 -5 38.83 2.78
 6 -15 -5 34.39 2.48
 6 -15 -4 14.49 1.8
 6 -15 -4 14.86 1.66
 6 -15 -3 27.88 2.57
 6 -15 -2 14.32 1.91
 6 -15 -1 157.83 6.14
 6 15 -1 178.04 6.41
 6 -15 0 9.75 1.59
 6 15 0 11.45 1.67
 6 -15 1 239.57 7.35
 6 15 1 250.22 7.81
 6 15 2 16.29 2
 6 15 3 81.14 4.5
 6 15 4 4.94 1.08
 -6 -15 -5 19.4 2.12
 6 15 5 19.91 1.92
 6 -16 -6 22.95 1.59
 6 -16 -5 34.28 2.2
 6 16 -5 35.24 2.02
 6 -16 -5 30.03 1.93
 6 -16 -4 6.15 1.11
 6 16 -4 6.77 1
 6 -16 -3 92.13 4.14
 6 16 -3 101.37 4.09
 6 -16 -2 46.37 3.02
 6 16 -2 55.28 3.18
 6 -16 -1 92.22 4.31
 6 16 -1 102.93 4.45
 6 -16 0 94.34 4.32
 6 16 0 111.46 4.75
 6 16 1 3.23 0.88
 6 16 2 90.23 4.39
 6 16 3 58.54 3.48
 -6 -16 -4 22.9 2.33
 6 16 4 26.1 2.16
 6 -17 -4 160.68 4.52
 6 17 -4 181.12 4.34
 6 -17 -3 4.56 0.84
 6 17 -3 4.34 0.79
 6 -17 -2 127.81 4.41
 6 17 -2 138.09 4.45
 6 -17 -1 9.32 1.21
 -6 -17 1 12.21 1.62
 6 17 -1 12.74 1.41
 -6 -17 0 20.87 2.31
 6 17 0 20.08 1.8
 6 -17 0 18.42 1.64
 -6 -17 -1 17.99 2.16
 6 17 1 20.18 1.85
 -6 -17 -2 6.33 1.25
 6 17 2 9.82 1.3
 -6 -17 -3 8.17 1.29
 6 18 -2 9.38 1
 6 18 -1 69.66 2.82
 6 18 0 8.79 1.04
 -7 0 11 2.55 0.75
 -7 0 10 0.09 0.27
 -7 0 9 71.46 5.13
 -7 0 8 0.19 0.35
 7 0 -8 -0.29 0.45
 -7 0 7 174.32 8.56
 7 0 -7 171.26 8.06
 7 0 -6 0.2 0.47
 7 0 -5 31.51 3.44
 7 0 -4 0.52 0.71
 7 0 -4 3.53 1.25
 7 0 -3 1.26 0.75
 7 0 -3 3.22 1.22
 7 0 -2 0.04 0.84
 7 0 -1 366.67 13.89
 7 0 0 0.05 0.25
 7 0 0 -0.14 0.3
 7 0 1 260.04 10.62
 7 0 1 190.97 10.72
 7 0 2 0.24 0.43
 7 0 2 0.11 0.68
 7 0 2 -0.4 0.57
 7 0 3 305.8 11.4
 7 0 3 285.21 10.73
 7 0 3 272.16 13.12
 7 0 4 -0.12 0.72
 7 0 4 0.74 0.73
 7 0 4 0.09 0.83
 7 0 5 2.16 1.14
 7 0 5 2.04 0.94
 7 0 6 0.43 0.33
 7 0 6 0.39 0.55
 7 0 7 95.66 5.62
 7 0 8 0.84 0.63
 7 0 9 183.41 6.57
 -7 -1 11 5.2 1.1
 -7 1 11 5.55 1.1
 -7 -1 10 13.01 2.02
 -7 1 10 11.93 1.85
 -7 -1 9 13.53 2.26
 -7 1 9 14.27 2.24
 -7 -1 8 66.26 5.24
 -7 1 8 62.34 4.94
 7 -1 -8 66.29 4.89
 -7 -1 7 26.29 3.4
 7 1 -7 23.25 3
 7 -1 -7 23.59 2.96
 7 1 -6 172.35 8.18
 7 -1 -6 183.53 8.22
 7 1 -5 77.17 5.38
 7 -1 -5 84.08 5.58
 7 1 -4 10.53 2.17
 7 -1 -4 10.76 2.07
 7 1 -4 8.27 1.75
 7 1 -3 104.03 6.89
 7 -1 -3 111.8 7.09
 7 1 -3 110.24 6.23
 7 -1 -2 36.8 4.19
 7 1 -2 34.96 4.11
 7 -1 -1 38.46 4.26
 7 1 -1 52 5.13
 7 -1 0 165.93 9.42
 7 -1 0 161.08 8.6
 7 1 0 158.31 9.63
 7 1 1 2.92 1.19
 7 -1 1 3.67 1.19
 7 1 1 1.66 0.61
 7 -1 1 2.2 1.08
 7 -1 2 245.28 10.31
 7 1 2 237.66 8.89
 7 1 2 229.85 9.82
 7 1 2 208.98 11.59
 7 -1 2 208.9 11.29
 7 1 3 38.5 4.04
 7 -1 3 43.66 4.19
 7 1 3 37.45 3.81
 7 1 3 44.14 5.34
 7 -1 3 42.56 4.25
 7 -1 3 41.72 5.08
 7 -1 4 118.29 6.94
 7 1 4 117.72 7.25
 7 1 4 120.97 8.56
 7 -1 4 125.29 8.61
 7 1 4 114.97 6.81
 7 -1 5 219.04 9.27
 7 1 5 191.81 9.59
 7 1 5 212.52 9
 7 1 5 218.62 10.8
 7 -1 5 217.32 10.65
 7 1 6 5.76 1.66
 7 -1 6 6.75 1.63
 7 1 6 4.31 1.27
 7 -1 6 4.36 1.35
 7 -1 7 76.16 4.99
 7 1 7 82.11 5.12
 7 1 7 84.8 5.79
 7 1 8 126.68 5.92
 7 -1 8 115.55 5.72
 7 -1 9 20.42 2.18
 -7 -2 11 2.43 0.73
 -7 2 11 2.39 0.74
 -7 -2 10 18.34 2.4
 -7 2 10 15.45 2.08
 -7 -2 9 7.06 1.65
 -7 2 9 6.62 1.51
 7 -2 -9 6.59 1.43
 -7 2 8 8.47 1.86
 -7 -2 8 8.55 1.94
 7 -2 -8 8.61 1.7
 -7 -2 7 0.22 0.54
 7 2 -7 0.07 0.71
 7 -2 -7 0.04 0.26
 7 2 -6 43.74 4.17
 7 -2 -6 48.07 4.22
 7 2 -5 3.72 1.11
 7 -2 -5 5.53 1.54
 7 -2 -4 198.32 7.88
 7 2 -4 213.62 8.97
 7 2 -3 3.51 1.19
 7 -2 -3 2.21 0.84
 7 2 -3 4.37 1.2
 7 -2 -2 221.87 8.79
 7 -2 -2 251.28 10.87
 7 2 -2 257.26 11.44
 7 -2 -1 75.2 5.09
 7 -2 -1 78.04 6.24
 7 -2 -1 69.8 5.63
 7 2 -1 82.33 6.78
 7 -2 0 147.02 8.84
 7 -2 0 148.49 8.24
 7 2 0 145.03 7.94
 7 2 0 126.66 8.63
 7 -2 1 56.22 5
 7 2 1 47.83 4.53
 7 2 1 40.85 5.05
 7 -2 1 43.1 4.96
 7 -2 2 40.05 4.23
 7 2 2 37.71 3.98
 7 2 2 39.91 3.6
 7 2 2 39.77 5.09
 7 -2 2 37.92 4.74
 7 2 3 24.98 3.15
 7 2 3 27.44 3.28
 7 -2 3 23.73 3.23
 7 2 3 30.16 4.46
 7 -2 3 25.15 3.88
 7 2 4 310.43 11.67
 7 -2 4 310.41 11.46
 7 2 4 331.96 14.2
 7 2 4 335.78 11.41
 7 -2 4 324.3 13.66
 7 2 5 1.75 1.22
 7 -2 5 1.75 1.28
 7 2 5 1.54 0.89
 7 -2 5 1.25 0.82
 7 2 5 0.66 0.41
 7 -2 6 385.84 11.9
 7 2 6 391.7 13.76
 7 -2 7 17.77 2.41
 7 2 7 23.59 3.17
 7 -2 8 91.72 5.09
 7 -2 9 21.16 2.24
 -7 -3 11 15.94 1.76
 -7 3 11 13.95 1.68
 -7 -3 10 0.08 0.35
 -7 3 10 0.3 0.23
 -7 -3 9 11.04 2.1
 -7 3 9 11.53 1.94
 7 -3 -9 11.03 1.81
 -7 -3 8 1.33 0.56
 -7 3 8 2.16 0.94
 7 -3 -8 1.73 0.74
 -7 -3 7 11.04 2.28
 7 -3 -7 9.57 1.84
 -7 -3 6 11.28 2.34
 7 -3 -6 12.32 2.16
 7 3 -6 10.43 2
 7 -3 -5 68.9 4.54
 7 3 -5 70.24 5.35
 7 -3 -4 13.1 2.06
 7 3 -4 14.24 2.3
 7 -3 -3 280.11 9.63
 7 3 -3 268.4 10.03
 7 -3 -2 15.84 2.32
 7 3 -2 19 3.1
 7 -3 -1 202.4 8.6
 7 -3 -1 174.62 8.9
 7 3 -1 190.3 10.36
 7 -3 0 34.36 4.28
 7 -3 0 31.2 3.42
 7 -3 0 29.64 3.71
 7 3 0 26.33 3.98
 7 3 1 0.91 1
 7 3 1 0.01 0.46
 7 -3 1 1.39 0.84
 7 3 1 1.56 0.75
 7 -3 1 0.41 0.61
 7 3 2 171.77 7.42
 7 -3 2 180.97 8.94
 7 3 2 167.83 10.61
 7 -3 3 166.64 8.45
 7 3 3 151.81 7.6
 7 3 3 154.29 9.99
 7 -3 3 150.9 9.38
 7 3 4 1.72 1.49
 7 -3 4 0.55 1.08
 7 -3 4 1.06 0.87
 7 3 4 0.66 0.57
 7 -3 5 708.43 16.77
 7 3 5 754.94 20.37
 7 -3 6 11.45 2.07
 7 3 6 8.99 1.95
 7 3 6 12.42 2.52
 7 -3 7 471.36 12.46
 7 -3 8 1.81 0.68
 7 -3 9 35.23 2.84
 -7 -4 11 0.3 0.28
 -7 4 11 -0.09 0.18
 -7 4 10 11.86 1.66
 -7 -4 10 13.86 1.91
 -7 -4 9 11.49 2.11
 -7 4 9 10.96 1.84
 7 -4 -9 9.92 1.64
 -7 -4 8 3.78 1.44
 -7 4 8 2.38 0.94
 7 -4 -8 3.46 1.05
 -7 -4 7 116.45 7.36
 7 -4 -7 124.52 6.57
 -7 -4 6 3.13 1.29
 7 -4 -6 1.96 0.91
 -7 -4 5 42.96 4.47
 7 -4 -5 36.13 3.38
 7 4 -4 66.92 5.22
 7 -4 -4 76.56 4.9
 7 -4 -3 2.33 0.92
 7 4 -2 90.87 6.93
 7 -4 -2 91.59 5.52
 7 -4 -1 54.41 4.98
 7 -4 -1 61.25 4.69
 7 4 -1 60.7 5.95
 7 -4 0 55.37 5.35
 7 -4 0 52.37 4.91
 7 4 0 55.03 3.53
 7 -4 0 56.27 4.6
 7 4 0 40.11 5.03
 7 -4 1 301.18 12.79
 7 -4 1 336.13 11.45
 7 4 1 345.38 9.68
 7 4 1 273.23 13.41
 7 -4 1 368.83 12.69
 7 -4 2 6.61 1.83
 7 4 2 7.64 2.32
 7 -4 2 4.39 1.59
 7 4 2 6.49 1.46
 7 -4 3 434.63 13.71
 7 4 3 413.33 12.33
 7 4 3 415.68 16.18
 7 -4 3 411.04 15.29
 7 -4 4 12.92 2.42
 7 4 4 18.88 2.78
 7 4 4 22.63 3.69
 7 -4 4 20.97 3.36
 7 -4 5 142.05 7.45
 7 4 5 124.29 7.51
 7 4 5 153.03 9.23
 7 -4 6 266.87 9.81
 7 4 6 232.62 10.35
 7 -4 7 35.4 3.34
 7 -4 8 60.19 4.02
 7 -4 9 187.43 6.47
 -7 -5 11 0.08 0.27
 -7 -5 11 0.11 0.16
 -7 -5 10 12.55 1.73
 -7 -5 9 -0.38 0.61
 -7 5 9 0.35 0.32
 7 -5 -9 0.1 0.38
 -7 -5 8 45.07 4.45
 -7 5 8 37.27 3.52
 7 -5 -8 43.68 3.63
 -7 -5 7 3.4 1.37
 7 -5 -7 4.79 1.32
 7 -5 -6 115.98 5.73
 -7 -5 6 120.57 7.69
 7 -5 -5 27.52 2.97
 -7 -5 5 30.54 3.85
 7 -5 -5 28.63 3.19
 7 -5 -4 30.93 3.28
 7 -5 -4 35.7 3.45
 7 -5 -3 24.69 2.87
 7 -5 -2 16.69 2.41
 7 5 -1 1.05 0.88
 7 -5 -1 0 0.36
 7 -5 -1 0.11 0.32
 7 -5 0 253.28 11.35
 7 -5 0 251.81 9.64
 7 -5 0 222.48 10.07
 7 5 0 230.89 7.25
 7 5 1 -0.15 0.56
 7 -5 1 -0.01 0.29
 7 -5 1 0.48 0.5
 7 -5 1 0.38 0.52
 7 5 1 0.35 0.26
 7 -5 2 405.96 13.15
 7 5 2 392.15 11.06
 7 5 2 335.3 14.66
 7 -5 2 330.15 13.51
 7 5 3 1.76 1.41
 7 -5 3 2.14 1.07
 7 -5 3 0.57 0.71
 7 5 3 2.64 1.11
 7 5 4 47.48 4.4
 7 -5 4 51.76 4.56
 7 5 4 52.21 5.54
 7 -5 5 21.63 2.9
 7 5 5 19.06 2.9
 7 5 5 23.25 3.6
 7 -5 6 0.39 0.35
 7 5 6 -0.33 0.68
 7 -5 7 9.29 1.73
 7 -5 8 125.21 5.7
 7 -5 9 7.64 1.29
 -7 -6 11 0.33 0.26
 -7 -6 10 3.34 0.81
 -7 6 10 3.28 0.83
 -7 6 9 17.35 2.05
 7 -6 -9 18.85 2.1
 -7 -6 9 18.35 2.26
 -7 -6 8 0.04 0.55
 -7 6 8 0.23 0.41
 7 -6 -8 0.03 0.25
 -7 -6 7 56.44 5.21
 7 -6 -7 64.39 4.6
 -7 -6 6 34.06 4.12
 7 -6 -6 30.45 2.98
 7 -6 -6 30.8 3.38
 -7 -6 5 108.7 7.4
 7 -6 -5 91.93 5.79
 7 -6 -5 101.99 5.66
 7 -6 -4 157.26 7.42
 7 -6 -4 165.56 7.46
 7 -6 -3 2.44 0.97
 7 -6 -3 1.45 0.67
 7 -6 -2 10.72 1.96
 7 6 -1 70.3 3.81
 7 -6 -1 80.39 5.25
 7 6 -1 71.65 6.43
 7 6 0 9.29 2.27
 7 -6 0 8.29 1.93
 7 6 0 8.84 1.49
 7 -6 0 10.81 1.99
 7 -6 0 12.32 2.58
 7 -6 1 162.88 9.23
 7 -6 1 191.51 9.04
 7 6 1 178.64 6.88
 7 -6 1 188.37 8.42
 7 -6 2 11.74 2.13
 7 6 2 13.99 2.91
 7 6 2 14.94 2.17
 7 -6 2 14.74 2.5
 7 -6 2 13.18 2.66
 7 6 3 190.06 8.28
 7 6 3 180.34 10.46
 7 -6 3 197.14 8.92
 7 -6 4 277.04 10.4
 7 6 4 270.35 10.39
 7 6 4 298.68 13.33
 7 -6 5 0.58 0.22
 7 6 5 0.9 0.72
 7 6 5 0.83 0.89
 7 -6 6 58.27 4.35
 7 6 6 52.45 4.72
 7 -6 7 9.34 1.66
 7 6 7 11.04 2.02
 7 -6 8 51.6 3.55
 7 -6 9 135.51 5.22
 -7 -7 10 0.14 0.33
 7 -7 -9 10.29 1.5
 -7 -7 8 3.81 1.25
 -7 7 8 2.79 0.95
 7 -7 -8 4.09 1.12
 -7 -7 7 1.78 1.07
 7 -7 -7 3.42 1.18
 7 -7 -7 1.78 0.79
 7 -7 -6 0.77 0.63
 -7 -7 6 0.31 0.44
 7 -7 -6 -0.33 0.8
 7 -7 -5 265.4 9.28
 7 -7 -5 249.45 9.54
 7 -7 -4 4.08 1.24
 7 -7 -4 1.8 0.77
 7 -7 -3 333.67 10.6
 7 -7 -3 289.82 9.82
 7 -7 -2 1.85 0.88
 7 7 -1 89.93 4.46
 7 -7 -1 99.85 5.92
 7 -7 0 26.09 3.65
 7 -7 0 20.43 3.01
 7 7 0 24.3 2.42
 7 -7 0 26.11 3.07
 7 7 0 14.66 2.84
 7 -7 1 23.53 3.53
 7 -7 1 27.78 3.43
 7 7 1 26.61 2.66
 7 -7 1 27.21 3.2
 7 7 1 15.6 3.06
 7 -7 2 9.62 1.9
 7 -7 2 8.7 1.92
 7 7 2 9.22 2.26
 7 -7 2 9.98 2.28
 7 7 2 8.87 1.62
 7 -7 3 175.24 8.25
 7 7 3 180.9 8.05
 7 7 3 167.35 10.01
 7 7 4 4.64 1.63
 7 -7 4 3.77 1.28
 7 7 4 2.35 1.04
 7 -7 5 339.15 10.83
 7 7 5 306.4 11.27
 7 -7 6 1.59 0.81
 7 7 6 1.01 0.58
 7 -7 7 147.99 6.31
 7 7 7 152.55 7.41
 7 -7 8 6.91 1.26
 7 -7 9 48.73 2.99
 -7 -8 10 20.86 2.07
 7 -8 -9 7.07 1.16
 7 -8 -8 3.26 0.97
 7 -8 -7 32.05 3.1
 7 -8 -7 27.45 3.04
 7 -8 -6 47.21 3.7
 7 -8 -6 47.85 4.11
 7 -8 -5 17.09 2.38
 7 -8 -5 14.73 2.33
 7 -8 -4 191.98 8.13
 7 -8 -4 169.7 7.58
 7 -8 -3 2.95 1.11
 7 -8 -3 2.42 0.83
 7 -8 -2 109.84 6.13
 7 8 -2 95.91 4.48
 7 -8 -1 20.86 2.73
 7 8 -1 20.33 2.14
 7 -8 0 46.88 4.08
 7 8 0 43.76 3.26
 7 -8 0 48.14 4.86
 7 8 0 35.68 4.34
 7 -8 0 34.12 3.88
 7 -8 1 80.15 6.38
 7 8 1 84.87 4.75
 7 -8 1 77.79 5.69
 7 -8 1 89.23 5.57
 7 8 2 1.67 1.12
 7 -8 2 1.01 0.8
 7 -8 2 1.76 0.71
 7 8 2 1.01 0.44
 7 8 3 5.24 1.75
 7 -8 3 6.36 1.54
 7 8 3 6.56 1.38
 7 -8 4 315.39 10.51
 7 8 4 328.78 11.22
 7 8 4 334.43 13.85
 7 -8 5 0.37 0.46
 7 8 5 0.44 0.48
 7 -8 6 198.07 7.58
 7 8 6 189.23 8.5
 7 -8 7 16.72 2.03
 7 8 7 15.62 2.27
 7 -8 8 57.38 3.46
 -7 -9 9 4.76 1.07
 7 -9 -9 4.97 0.89
 7 -9 -8 69.07 3.82
 7 -9 -7 3.45 1.08
 7 -9 -7 2.34 0.84
 7 -9 -6 100.57 5.32
 7 -9 -6 95.51 5.67
 7 -9 -5 38.64 3.5
 7 -9 -5 33.06 3.31
 7 -9 -4 13.6 2.17
 7 -9 -4 11.32 1.86
 7 -9 -3 75.8 5.11
 7 9 -3 68.48 3.75
 7 -9 -3 65.86 4.48
 7 -9 -2 67.4 4.76
 7 9 -2 58.14 3.56
 7 -9 -1 42.85 3.76
 7 9 -1 40.71 3.08
 7 -9 0 58.34 5.24
 7 -9 0 58.97 4.42
 7 9 0 55.8 3.72
 7 -9 1 46.68 4.63
 7 -9 1 49.33 4.05
 7 9 1 50.1 3.63
 7 -9 1 37.28 3.85
 7 -9 2 213.78 8.48
 7 9 2 226.19 8.24
 7 -9 2 209.19 8.81
 7 -9 3 58.34 4.5
 7 9 3 65.98 4.72
 7 9 3 55.76 5.58
 7 -9 4 38.61 3.55
 7 9 4 39.71 3.85
 7 -9 5 148.59 6.66
 7 9 5 150.64 7.5
 7 -9 6 16.51 2.07
 7 9 6 17.12 2.47
 7 -9 7 54.36 3.54
 7 9 7 55.04 4.05
 7 -9 8 110.58 4.59
 7 -10 -8 0.78 0.45
 7 -10 -7 62.83 3.57
 7 -10 -7 66.75 4.3
 7 -10 -6 1.93 0.84
 7 -10 -6 1.32 0.68
 7 -10 -5 74.02 4.75
 7 -10 -5 61.54 4.34
 7 -10 -4 1.2 0.67
 7 -10 -4 1.28 0.62
 7 -10 -3 2.35 0.99
 7 10 -3 2.5 0.79
 7 -10 -3 1.4 0.47
 7 -10 -2 0.2 0.36
 7 10 -2 0.56 0.52
 7 -10 -1 165.47 7.27
 7 10 -1 157.28 6.03
 7 -10 0 10.82 2.22
 7 -10 0 8.39 1.72
 7 10 0 8.75 1.49
 7 -10 1 606.46 14.05
 7 10 1 608.39 12.75
 7 -10 2 10.21 1.9
 7 -10 2 11.31 1.9
 7 10 2 6.61 1.77
 7 10 2 13.93 2.03
 7 10 3 189.42 7.88
 7 -10 3 183.57 7.82
 7 -10 4 -0.18 0.35
 7 10 4 0.67 0.65
 7 -10 5 1.4 0.64
 7 10 5 1.03 0.56
 7 -10 6 0.07 0.13
 7 10 6 -0.22 0.31
 7 -10 7 25.53 2.29
 7 10 7 27.49 2.67
 7 -11 -8 46.03 2.57
 7 -11 -7 0.89 0.36
 7 -11 -7 1.71 0.67
 7 -11 -7 0.81 0.33
 7 -11 -6 27.68 2.58
 7 -11 -6 28.64 2.77
 7 -11 -5 37.46 3.26
 7 -11 -5 32.8 3
 7 -11 -4 7.83 1.63
 7 11 -4 8.57 1.27
 7 -11 -4 6.84 1.33
 7 -11 -3 54.83 4.14
 7 11 -3 54.12 3.3
 7 -11 -2 38.68 3.47
 7 11 -2 38.77 2.89
 7 -11 -1 106.18 5.68
 7 11 -1 101.35 4.82
 7 -11 0 226.97 8.2
 7 11 0 231.64 7.48
 7 -11 1 0.58 0.49
 7 11 1 0.77 0.5
 7 11 2 92.11 5.11
 7 11 3 124.37 6.23
 7 11 4 42.45 3.71
 7 -11 4 36.53 3.21
 7 -11 5 177.35 6.65
 7 11 5 181.62 7.56
 7 -11 6 5.24 1.12
 7 11 6 6.07 1.3
 7 -12 -7 7.25 1.12
 7 -12 -7 6.25 0.98
 7 -12 -6 18 1.99
 7 -12 -6 20 2.03
 7 -12 -5 3.77 1.01
 7 -12 -5 3.56 0.95
 7 -12 -4 77.36 4.68
 7 12 -4 79.19 3.74
 7 -12 -3 1.21 0.7
 7 12 -3 0.74 0.46
 7 -12 -2 207.65 7.69
 7 12 -2 213.09 6.6
 7 -12 -1 10.15 1.74
 7 -12 -1 10.17 1.84
 7 12 -1 11.67 1.6
 7 -12 0 35.65 3.08
 7 12 0 35.81 2.9
 7 -12 1 23.48 2.49
 7 12 1 28.32 2.66
 7 12 2 0.31 0.23
 7 12 3 2.74 0.81
 7 12 4 133.46 6.26
 7 12 5 0.71 0.47
 7 12 6 325.78 8.76
 7 -13 -7 1.41 0.39
 7 -13 -6 6.62 1.06
 7 -13 -6 7.09 1.13
 7 -13 -5 38.55 2.88
 7 -13 -5 32.68 2.49
 7 -13 -4 1.12 0.57
 7 13 -4 1.86 0.59
 7 -13 -4 0.83 0.3
 7 -13 -3 98.33 4.91
 7 13 -3 99.31 4.16
 7 -13 -2 10.55 1.68
 7 13 -2 11.9 1.54
 7 -13 -1 126.1 5.52
 7 13 -1 135.45 5.27
 7 -13 0 14.51 1.87
 7 13 0 17.47 1.96
 7 -13 1 1.04 0.5
 7 13 1 0.81 0.44
 7 13 2 35.06 2.94
 7 13 3 50.25 3.64
 7 13 4 34.8 3.03
 7 13 5 149.68 5.93
 7 -14 -6 -0.12 0.09
 7 -14 -6 0.75 0.42
 7 -14 -5 37.79 2.49
 7 14 -5 38.8 2.01
 7 -14 -4 3.68 0.9
 7 14 -4 4.56 0.79
 7 -14 -3 15.46 1.79
 7 14 -3 17.24 1.64
 7 -14 -2 72.19 3.92
 7 14 -2 80.69 3.69
 7 -14 -1 130.58 5.23
 7 14 -1 145.88 5.14
 7 -14 0 29.35 2.48
 7 14 0 31.94 2.49
 7 -14 1 118.76 4.8
 7 14 1 135.94 5.33
 7 14 2 7.92 1.29
 7 14 3 93.77 4.63
 7 14 4 23.99 2.3
 7 -15 -5 6.35 0.98
 7 -15 -4 66.35 3.1
 7 15 -4 65.99 2.64
 7 -15 -3 23.74 2
 7 15 -3 24.33 1.78
 7 -15 -2 18.36 1.79
 7 15 -2 20.81 1.74
 7 -15 -1 0.68 0.33
 7 15 -1 -0.06 0.14
 7 15 0 217.44 6.08
 7 -15 0 186.35 5.62
 7 15 1 6.87 1.12
 7 15 2 128.67 4.98
 7 15 3 6.47 1.13
 -7 -15 -4 45.82 2.96
 7 -16 -4 26.41 1.69
 7 -16 -3 2.72 0.61
 7 16 -3 2.63 0.52
 7 16 -2 105.2 3.46
 7 -16 -2 92.37 3.49
 7 -16 -1 33.65 2.13
 7 16 -1 41.09 2.3
 7 16 0 6.36 0.97
 7 16 1 100.37 3.89
 -7 -16 -2 15.4 1.75
 7 16 2 19.07 1.7
 -8 0 10 19.44 2.1
 -8 0 9 0.01 0.28
 -8 0 8 46.31 4.03
 -8 0 7 0.48 0.54
 8 0 -7 -0.25 0.63
 8 0 -6 106.72 6.23
 8 0 -5 0.15 0.4
 8 0 -5 -0.27 0.62
 8 0 -4 1.09 0.91
 8 0 -4 1.82 0.7
 8 0 -3 0.18 0.66
 8 0 -3 -0.02 0.22
 8 0 -2 117.56 7.86
 8 0 -1 -0.37 0.43
 8 0 0 123.54 8.74
 8 0 1 0.33 0.87
 8 0 1 -0.33 0.65
 8 0 2 244.24 11.48
 8 0 2 225.34 12.46
 8 0 3 -0.27 0.37
 8 0 3 -0.26 0.28
 8 0 4 48.82 4.76
 8 0 4 46.62 5.38
 8 0 5 0.44 0.79
 8 0 5 0.88 0.86
 8 0 6 8.46 1.87
 8 0 6 6.63 1.47
 8 0 7 0.34 0.4
 8 0 8 80.75 4.31
 -8 -1 10 7.33 1.31
 -8 1 10 6.14 1.16
 -8 -1 9 13.62 2.04
 -8 1 9 13.57 1.99
 -8 -1 8 -0.1 0.31
 -8 1 8 0.68 0.58
 8 -1 -8 0.64 0.46
 -8 -1 7 107.46 6.5
 -8 1 7 111.55 6.53
 8 -1 -7 106.77 6.05
 -8 -1 6 18.41 2.78
 8 1 -6 13.12 2.17
 8 -1 -6 17.67 2.54
 8 -1 -5 75.57 5.61
 8 1 -5 64.51 4.88
 8 -1 -5 72.5 5.11
 8 -1 -4 80.93 5.98
 8 1 -4 77.83 5.33
 8 -1 -4 82.27 5.43
 8 1 -4 89.07 6.3
 8 -1 -3 12.15 2.41
 8 1 -3 11.6 2.4
 8 1 -3 12 1.99
 8 -1 -3 13.77 2.24
 8 -1 -2 53.01 5.19
 8 1 -2 54.89 5.46
 8 1 -1 50.91 5.51
 8 -1 -1 46.58 5.13
 8 1 0 33.77 4.6
 8 -1 0 36.34 4.73
 8 -1 1 133.03 8.68
 8 1 1 139.1 8.63
 8 1 1 147.93 10.01
 8 -1 1 149.69 9.91
 8 1 2 3.02 1.51
 8 1 2 1.64 0.92
 8 -1 2 3.15 1.35
 8 -1 2 4.08 1.69
 8 1 2 2.2 0.75
 8 1 3 157.15 7.44
 8 1 3 138.7 9.75
 8 -1 3 141.37 9.68
 8 1 3 152.4 8.69
 8 1 4 100.65 6.75
 8 -1 4 101.7 6.78
 8 1 4 99.54 7.79
 8 -1 4 101.48 7.77
 8 -1 5 19.58 2.86
 8 1 5 21.74 3.02
 8 1 5 18.8 3.17
 8 -1 5 17.6 2.96
 8 1 6 87.87 5.49
 8 -1 6 89.89 5.53
 8 1 6 93.8 6.42
 8 -1 6 91.01 6
 8 -1 7 48.69 3.72
 8 -1 8 36.4 2.92
 -8 -2 10 3.13 0.83
 -8 2 10 3.02 0.78
 -8 -2 10 3.34 0.84
 -8 -2 9 11.32 1.89
 -8 2 9 10.7 1.73
 -8 -2 8 1.15 0.78
 -8 2 8 0.36 0.51
 8 -2 -8 0.65 0.18
 -8 -2 7 2.97 1.15
 8 -2 -7 1.85 0.74
 8 -2 -6 9.74 1.94
 -8 -2 6 8.33 1.91
 8 -2 -6 7.63 1.63
 8 -2 -5 88.46 5.95
 8 2 -5 78.67 5.45
 8 -2 -5 87.74 5.64
 8 -2 -4 13.83 2.49
 8 2 -4 12.33 2.09
 8 -2 -4 17.12 2.52
 8 -2 -3 179.13 9.07
 8 -2 -3 202.68 8.53
 8 2 -3 197.59 9.93
 8 -2 -2 87.51 6.59
 8 2 -2 100.35 7.47
 8 -2 -1 261.43 11.87
 8 2 -1 285.71 13.1
 8 -2 0 45.1 5.48
 8 2 0 34.65 4.81
 8 -2 0 36.41 4.6
 8 2 1 10.32 2.68
 8 -2 1 10.37 2.46
 8 -2 1 11.27 2.71
 8 -2 2 37.06 4.54
 8 2 2 28.52 3.8
 8 2 2 33.63 3.24
 8 2 2 26.73 4.35
 8 -2 2 27.34 4.27
 8 -2 3 120.82 7.77
 8 2 3 113.89 6.33
 8 2 3 87.17 6.47
 8 2 3 106.21 8.45
 8 -2 3 106.17 8.27
 8 -2 4 14.52 2.56
 8 2 4 11.53 2.6
 8 2 4 10.7 2.15
 8 2 4 12.73 2.18
 8 -2 4 13.11 2.82
 8 2 5 260.98 10.06
 8 -2 5 283.16 10.64
 8 2 5 289.11 12.49
 8 -2 5 269.25 11.28
 8 2 6 2.5 1.23
 8 -2 6 1.37 0.75
 8 -2 7 159.31 6.69
 8 -2 8 18.43 2.06
 -8 3 10 11.54 1.47
 -8 -3 10 11.38 1.48
 -8 -3 9 0.93 0.42
 -8 3 9 0.89 0.5
 -8 -3 8 0.21 0.37
 -8 3 8 0.05 0.21
 8 -3 -8 -0.71 0.53
 8 -3 -7 1.84 0.67
 -8 -3 7 1.67 0.87
 8 -3 -7 0.83 0.35
 8 -3 -6 2.46 1.03
 -8 -3 6 1.61 0.88
 8 -3 -6 2.23 0.8
 8 -3 -5 6.86 1.64
 -8 -3 5 7.51 1.8
 8 -3 -5 5.91 1.52
 8 -3 -4 144.31 7.87
 8 -3 -4 165.62 7.85
 8 3 -3 0.49 0.45
 8 -3 -3 0.79 0.88
 8 -3 -2 272.93 11.51
 8 3 -2 309.03 13.14
 8 3 -1 1.83 1.64
 8 -3 -1 1.6 0.92
 8 -3 0 39.61 4.79
 8 3 0 45.89 5.54
 8 -3 0 41.9 4.93
 8 -3 1 51.86 5.4
 8 3 1 56.13 3.87
 8 3 1 58.73 6.37
 8 -3 1 59.32 6.02
 8 3 2 2.63 1.48
 8 -3 2 1.82 0.97
 8 -3 2 1.8 0.81
 8 3 2 2.38 0.93
 8 3 3 0.37 0.41
 8 -3 3 1.02 0.55
 8 -3 3 1.13 0.8
 8 3 3 2.74 1.05
 8 -3 4 392.33 13.2
 8 3 4 376.55 11.99
 8 3 4 367.74 15.01
 8 -3 4 372.08 14.38
 8 3 5 2.55 1.33
 8 -3 5 3 1.22
 8 -3 5 2.36 1.07
 8 3 5 2.71 0.96
 8 -3 6 506 13.07
 8 3 6 529.91 15.71
 8 -3 7 0.18 0.29
 8 -3 8 119.56 5.17
 -8 4 10 4 0.83
 -8 -4 10 4.43 0.89
 -8 4 9 6.43 1.25
 -8 -4 9 5.25 1.2
 -8 -4 8 26.66 3.01
 -8 4 8 29.37 2.99
 8 -4 -8 28.23 2.78
 8 -4 -7 1.17 0.72
 -8 -4 7 1.45 0.75
 8 -4 -7 0.33 0.51
 -8 -4 6 31.9 3.59
 8 -4 -6 34.32 3.46
 -8 -4 5 0.84 0.81
 8 -4 -5 0.56 0.25
 8 -4 -4 14.09 2.49
 -8 -4 4 12.77 2.27
 8 -4 -3 110.17 7.03
 8 -4 -2 27.97 3.66
 8 4 -2 31.31 4.22
 8 -4 -1 69.07 5.92
 8 4 -1 77.62 6.89
 8 -4 0 77.19 6.56
 8 4 0 85.98 7.48
 8 -4 0 75.39 6.44
 8 4 1 1.38 0.91
 8 -4 1 1.03 0.74
 8 -4 1 1.42 0.98
 8 4 1 0.77 0.42
 8 4 2 208.84 7.95
 8 4 2 179.98 11.08
 8 -4 2 192.47 10.75
 8 4 3 2.43 0.96
 8 -4 3 1.71 0.85
 8 -4 3 3.29 1.33
 8 4 3 2.63 0.86
 8 -4 4 293.73 11.34
 8 4 4 289.29 10.43
 8 4 4 255.96 12.46
 8 -4 4 276.2 11.96
 8 -4 5 234.55 9.51
 8 4 5 244.26 9.66
 8 4 5 236.8 11.34
 8 4 6 2.76 1.13
 8 -4 6 3.1 1.02
 8 -4 7 92.64 4.99
 8 -4 8 90.41 4.42
 -8 5 9 15.34 1.86
 8 -5 -9 18.02 1.9
 -8 -5 9 15.94 1.81
 8 -5 -8 0.3 0.39
 -8 -5 8 0.29 0.16
 -8 5 8 0.28 0.48
 8 -5 -8 0.05 0.24
 -8 -5 7 42.73 3.99
 8 -5 -7 44.71 3.68
 -8 -5 6 6.19 1.62
 8 -5 -6 7.38 1.62
 -8 -5 5 41.88 4.11
 8 -5 -4 10.63 1.88
 8 -5 -3 1.24 1.05
 8 -5 -3 -0.08 0.46
 8 -5 -2 0.46 0.61
 8 -5 -2 -0.33 0.55
 8 -5 -1 124.66 7.84
 8 5 -1 141.32 9.11
 8 5 0 0.2 0.56
 8 -5 0 0.22 0.43
 8 5 0 1.14 0.62
 8 5 1 127.8 5.85
 8 5 1 128.86 9.14
 8 -5 1 115.51 7.83
 8 -5 1 127.34 8.42
 8 5 2 0.41 0.38
 8 -5 2 2.12 1.11
 8 -5 2 0.72 0.64
 8 5 2 2.29 0.8
 8 -5 3 124.55 7.62
 8 5 3 122.64 6.4
 8 5 3 100.64 7.96
 8 -5 3 105.19 7.61
 8 5 4 3.53 1.58
 8 -5 4 6.76 1.73
 8 5 4 4.25 1.23
 8 -5 5 67.44 4.91
 8 5 5 72.71 5.2
 8 5 5 72.3 6.2
 8 -5 6 13.1 2.04
 8 -5 7 25.81 2.57
 8 -5 8 7.35 1.24
 -8 6 9 0.73 0.38
 8 -6 -9 0.27 0.14
 -8 -6 8 33.91 3.21
 -8 6 8 35.99 3.03
 8 -6 -8 39.19 3.07
 -8 -6 7 0.62 0.47
 8 -6 -7 0.54 0.49
 -8 -6 6 50.71 4.39
 8 -6 -6 58.81 4.41
 8 -6 -5 56.12 4.06
 8 -6 -4 7.74 1.6
 8 -6 -3 103.16 5.83
 8 -6 -2 18.37 2.53
 8 -6 -2 20.61 3.05
 8 -6 -1 11.51 2.41
 8 -6 -1 8.85 1.8
 8 6 -1 14.21 2.77
 8 -6 0 84.4 6.53
 8 6 0 78.23 4.23
 8 6 0 94.18 7.43
 8 6 1 -0.57 0.91
 8 -6 1 -0.36 0.74
 8 -6 1 0.33 0.54
 8 6 1 0.89 0.56
 8 -6 2 124.11 7.75
 8 6 2 133.21 6.26
 8 6 2 103.68 7.98
 8 -6 2 110.38 7.7
 8 -6 3 96.48 6.48
 8 6 3 85.13 5.26
 8 6 3 66.39 6.35
 8 -6 3 76.26 6.23
 8 -6 4 52.67 4.54
 8 6 4 59.26 4.54
 8 6 4 47.16 5.21
 8 -6 5 74.81 5.02
 8 6 5 70.89 5.04
 8 6 5 68.83 6.03
 8 -6 6 2.75 0.92
 8 6 6 0.71 0.25
 8 -6 7 94.32 4.77
 8 -6 8 51.12 3.09
 8 -7 -9 4.08 0.77
 8 -7 -8 6.71 1.33
 -8 7 8 4.36 1.03
 8 -7 -8 4.34 0.97
 -8 -7 7 4.05 1.15
 8 -7 -7 5.99 1.3
 8 -7 -6 39.68 3.56
 8 -7 -5 0.17 0.21
 8 -7 -4 177.31 7.46
 8 -7 -3 4.78 1.3
 8 -7 -2 229.38 8.65
 8 -7 -2 250.54 10.45
 8 -7 -1 2.28 1.03
 8 -7 -1 1.32 0.65
 8 7 -1 1.29 0.42
 8 -7 0 61.32 5.42
 8 -7 0 52.03 4.12
 8 7 0 53.83 3.52
 8 7 0 65.79 5.92
 8 7 1 5.51 1.75
 8 -7 1 4.92 1.64
 8 -7 1 5.29 1.54
 8 7 1 4.74 1.08
 8 7 2 17.24 2.23
 8 -7 2 13.89 2.47
 8 7 2 14.26 2.84
 8 -7 2 13.47 2.56
 8 7 3 1.34 0.58
 8 -7 3 2.85 1.13
 8 7 3 3.36 1.05
 8 -7 4 220.09 8.97
 8 7 4 236.3 8.92
 8 -7 5 2.59 0.93
 8 7 5 2.93 0.91
 8 -7 6 214.53 7.51
 8 7 6 215.12 8.23
 8 -7 7 -0.13 0.23
 8 -8 -8 5.6 1.04
 8 -8 -7 1.8 0.73
 8 -8 -6 3.76 1.01
 8 -8 -6 7.97 1.56
 8 -8 -5 33.06 3.06
 8 -8 -4 12.76 1.99
 8 -8 -3 91.86 5.36
 8 -8 -2 16.44 2.33
 8 -8 -2 20.43 2.91
 8 -8 -1 119.87 6.13
 8 8 -1 110.38 4.7
 8 -8 0 80.67 6.03
 8 -8 0 69.79 4.66
 8 8 0 72.35 4.01
 8 8 1 15.61 2
 8 8 1 18.68 3.11
 8 -8 1 18.12 2.91
 8 8 2 3.15 1.22
 8 -8 2 1.36 0.59
 8 8 2 3.48 1
 8 -8 3 119.27 6.74
 8 8 3 116.93 7.91
 8 -8 4 17.37 2.42
 8 8 4 19.82 2.52
 8 -8 5 169.49 7.03
 8 8 5 199.77 7.96
 8 -8 6 12.46 1.76
 8 8 6 14.22 2.03
 8 -8 7 82.68 4.08
 8 -9 -8 9.28 1.36
 8 -9 -8 6.92 1.05
 -8 9 7 40.7 2.84
 8 -9 -7 41.83 2.99
 8 -9 -6 2.92 0.82
 8 -9 -6 4.67 1.19
 8 -9 -5 28.05 2.76
 8 -9 -4 24.28 2.72
 8 -9 -3 0.4 0.44
 8 -9 -2 37.41 3.34
 8 -9 -2 46.54 4.22
 8 9 -2 38.59 2.58
 8 -9 -1 34.15 3.72
 8 -9 -1 27.43 2.83
 8 9 -1 28.93 2.37
 8 -9 0 112.67 5.74
 8 9 0 112.85 4.96
 8 9 1 132.89 5.66
 8 -9 1 126.05 7.29
 8 -9 2 14.4 2.45
 8 9 2 17.59 2.18
 8 9 2 18.07 2.98
 8 -9 3 101.02 5.87
 8 9 3 142 6.41
 8 -9 4 86.97 5.16
 8 9 4 114.42 5.82
 8 -9 5 3.01 0.91
 8 9 5 3.2 0.96
 8 -9 6 27.29 2.47
 8 9 6 34.86 2.97
 8 -10 -8 59.64 3.09
 8 -10 -7 1.1 0.54
 8 -10 -6 51.18 3.16
 8 -10 -6 66.04 3.93
 8 -10 -5 2.32 0.82
 8 -10 -4 14.26 1.99
 8 -10 -3 1.83 0.73
 8 -10 -2 6.21 1.5
 8 -10 -2 5.14 1.26
 8 10 -2 6.67 1.07
 8 -10 -1 0.64 0.41
 8 -10 -1 -0.18 0.34
 8 10 -1 0.3 0.28
 8 -10 0 289.05 8.8
 8 10 0 310.04 8.09
 8 10 1 7.54 1.33
 8 10 2 305.96 8.8
 8 -10 3 21.29 2.95
 8 10 3 9.72 1.66
 8 -10 4 47.12 3.54
 8 10 4 69.56 4.33
 8 -10 5 1.29 0.71
 8 10 5 0.84 0.47
 8 -10 6 4.09 1.01
 8 -11 -7 45.49 2.56
 8 -11 -6 6.26 1.04
 8 -11 -6 7.68 1.24
 8 -11 -5 13.19 1.71
 8 -11 -4 21.57 2.28
 8 -11 -3 0.57 0.48
 8 -11 -3 -0.07 0.19
 8 -11 -2 68.91 4.6
 8 -11 -2 64.3 3.99
 8 11 -2 63.66 3.19
 8 -11 -1 55.33 4.21
 8 -11 -1 42.37 3.21
 8 11 -1 50.45 2.98
 8 -11 0 6.95 1.29
 8 -11 0 7.57 1.62
 8 11 0 7.43 1.23
 8 11 1 104.43 4.72
 8 11 2 6.45 1.27
 8 11 3 100.22 4.93
 8 11 4 81.56 4.43
 8 11 5 14.64 1.8
 8 -12 -6 8.36 1.23
 8 -12 -6 9.89 1.23
 8 -12 -5 20.81 1.9
 8 -12 -5 22.66 2.18
 8 -12 -4 0.18 0.22
 8 -12 -4 0.48 0.32
 8 -12 -3 96.33 4.87
 8 -12 -3 89.35 4.32
 8 12 -3 90.29 3.43
 8 -12 -2 0.75 0.45
 8 -12 -2 0.32 0.3
 8 12 -2 0.49 0.29
 8 -12 -1 50.45 3.27
 8 12 -1 55.86 3.03
 8 -12 0 10.16 1.45
 8 12 0 14.87 1.64
 8 12 1 24.4 2.18
 8 12 2 0.17 0.19
 8 12 3 22.19 2.19
 8 12 4 2.39 0.72
 8 12 5 192.1 5.89
 8 -13 -5 4.3 0.83
 8 -13 -5 5.93 0.98
 8 -13 -4 40.7 2.73
 8 -13 -4 38.57 2.46
 8 -13 -3 0.25 0.15
 8 -13 -3 0.31 0.16
 8 13 -3 0.43 0.23
 8 -13 -2 64.12 3.67
 8 -13 -2 56.52 3.16
 8 13 -2 56.71 2.73
 8 -13 -1 12.61 1.5
 8 13 -1 15.11 1.5
 8 13 0 23.18 1.93
 8 13 1 22.68 2
 8 13 2 11.05 1.43
 8 13 3 42.39 2.77
 8 13 4 53.51 2.97
 8 -14 -4 0.46 0.2
 8 -14 -3 23.98 1.78
 8 -14 -2 20.3 1.68
 8 14 -2 23.29 1.6
 8 -14 -1 16.92 1.53
 8 14 -1 20.52 1.62
 8 14 0 93.82 3.6
 8 14 1 11.05 1.28
 8 14 2 122.23 4.33
 -9 0 9 34.35 2.79
 -9 0 8 0.17 0.43
 -9 0 7 40.15 3.67
 -9 0 6 0.24 0.63
 9 0 -5 62.06 4.44
 9 0 -5 88.34 5.54
 9 0 -4 0.38 0.3
 9 0 -4 0.04 0.64
 9 0 -3 9.05 2.09
 9 0 -2 -0.53 0.65
 9 0 -1 88.53 6.93
 9 0 0 1.75 1.23
 9 0 1 177.7 10.4
 9 0 2 0.57 0.8
 9 0 3 150.62 9.21
 9 0 4 17.75 3.38
 9 0 4 -0.39 0.67
 9 0 5 29.66 3.49
 9 0 5 10.31 1.99
 9 0 6 0.19 0.31
 -9 -1 9 0.75 0.38
 -9 1 9 1.24 0.57
 -9 -1 8 46.31 3.64
 -9 1 8 46.4 3.66
 -9 -1 7 0.84 0.55
 -9 1 7 0.77 0.56
 -9 -1 6 50.64 4.26
 -9 1 6 54.16 4.48
 9 -1 -6 41.75 3.56
 9 -1 -5 6.57 1.56
 -9 -1 5 6.17 1.56
 9 -1 -5 6.09 1.37
 9 1 -4 20.92 2.56
 9 -1 -4 23.14 2.67
 9 1 -4 31.72 3.58
 9 -1 -4 26.16 3.23
 9 -1 -3 63.69 4.4
 9 1 -3 81.46 6.08
 9 -1 -3 78.28 5.9
 9 1 -2 9.83 2.33
 9 -1 -2 8.84 2.13
 9 1 -1 25.85 3.8
 9 -1 -1 21.69 3.37
 9 1 0 117.51 8.36
 9 -1 0 121.28 8.31
 9 1 1 9.64 2.52
 9 -1 1 9.7 2.5
 9 1 2 175.85 10.36
 9 -1 2 178.96 10.32
 9 -1 3 31.89 4.12
 9 1 3 25.01 3.71
 9 -1 3 22.51 3.52
 9 -1 4 73.02 5.47
 9 1 4 63.54 5.61
 9 -1 4 64.97 5.54
 9 -1 5 58.09 4.41
 9 1 5 59.66 4.96
 9 -1 5 57.51 4.66
 9 -1 6 3.14 1.16
 -9 -2 9 0.2 0.27
 -9 2 9 0.22 0.22
 -9 -2 8 6.04 1.34
 -9 2 8 6.24 1.38
 -9 -2 7 8.49 1.66
 -9 2 7 9.77 1.78
 9 -2 -7 8.18 1.46
 9 -2 -6 1.43 0.7
 -9 -2 6 1.87 0.81
 9 -2 -6 2.51 0.85
 -9 -2 5 9.84 1.89
 9 -2 -5 9.66 1.71
 9 -2 -5 10.46 1.99
 9 -2 -4 69.05 4.64
 9 -2 -4 76.08 5.53
 9 2 -3 1.45 1.06
 9 -2 -3 1.05 0.81
 9 -2 -3 0.3 0.18
 9 2 -2 246.9 11.09
 9 -2 -2 223.09 10.3
 9 -2 -1 11.02 2.47
 9 2 -1 12.54 2.7
 9 2 0 60.42 6
 9 -2 0 55.19 5.49
 9 2 1 54.31 5.83
 9 -2 1 51.75 5.45
 9 2 2 2.14 1.23
 9 -2 2 3.1 1.49
 9 2 3 10.55 2.38
 9 -2 3 10.41 2.43
 9 -2 3 10.64 2.3
 9 -2 4 106.63 6.61
 9 2 4 110.42 7.4
 9 -2 4 106.1 6.86
 9 2 5 7.56 1.8
 9 -2 5 6.82 1.53
 9 -2 5 5.56 1.36
 9 -2 6 135.66 6.05
 -9 3 9 1.24 0.46
 -9 -3 8 -0.2 0.34
 -9 3 8 -0.23 0.39
 -9 -3 7 0.86 0.43
 -9 3 7 1.67 0.83
 9 -3 -7 1.47 0.57
 9 -3 -6 0.79 0.57
 -9 -3 6 0.72 0.59
 9 -3 -6 0.36 0.43
 9 -3 -5 27.12 3.08
 -9 -3 5 26.18 3
 9 -3 -5 25 2.75
 9 -3 -4 5.11 1.5
 -9 -3 4 2.87 1.01
 9 -3 -4 2.34 0.89
 9 -3 -3 130.77 6.33
 9 -3 -3 128.39 7.37
 9 3 -2 7.09 1.91
 9 -3 -2 7.06 1.86
 9 3 -1 135.17 8.48
 9 -3 -1 110.34 7.4
 9 3 0 21.77 3.64
 9 -3 0 18.89 3.21
 9 3 1 27.51 4.04
 9 -3 1 25.04 3.77
 9 3 2 -0.63 0.28
 9 -3 2 0.43 0.53
 9 3 2 0.86 0.39
 9 -3 3 57.46 5.23
 9 3 3 56.35 3.79
 9 3 3 61.54 5.78
 9 -3 3 62.19 5.63
 9 3 4 0.3 0.29
 9 -3 4 -0.07 0.24
 9 -3 4 0.08 0.37
 9 -3 5 203.62 8.27
 9 3 5 234.84 9.9
 9 -3 6 3.02 1
 -9 -4 8 0.22 0.13
 -9 4 8 0.63 0.34
 -9 -4 7 10.58 1.74
 -9 4 7 13.38 2.05
 9 -4 -7 11.14 1.66
 9 -4 -7 13.37 1.79
 9 -4 -6 3.23 1.03
 -9 -4 6 2.81 0.93
 9 -4 -6 1.35 0.55
 9 -4 -5 21.4 2.71
 -9 -4 5 20.03 2.52
 9 -4 -5 18.9 2.38
 9 -4 -4 13.18 2.24
 9 -4 -4 15.97 2.23
 9 -4 -3 0.06 0.56
 9 -4 -3 0.74 0.72
 9 -4 -2 45.88 3.67
 9 4 -2 50.95 4.83
 9 -4 -2 40.27 4.25
 9 4 -1 53.81 5.21
 9 -4 -1 45.83 4.73
 9 4 0 18.51 3.23
 9 -4 0 16.37 2.87
 9 4 1 124.32 8.26
 9 -4 1 117.36 7.81
 9 4 2 10.43 2.38
 9 4 2 10.07 1.55
 9 -4 2 12.63 2.57
 9 -4 3 207.89 9.71
 9 4 3 224.94 7.55
 9 4 3 230.47 10.98
 9 -4 3 207.04 9.89
 9 -4 4 39.35 3.94
 9 4 4 49.25 4.83
 9 -4 4 41.9 3.95
 9 -4 5 46.13 3.85
 9 4 5 49.43 4.52
 9 -4 6 56.42 3.81
 -9 5 8 26.2 2.45
 9 -5 -8 25.11 2.17
 9 -5 -7 2.06 0.73
 -9 -5 7 0.96 0.59
 -9 5 7 1.55 0.68
 9 -5 -7 0.81 0.46
 9 -5 -6 45.32 3.64
 -9 -5 6 37.37 3.23
 9 -5 -6 42.23 3.37
 9 -5 -5 0.98 0.71
 9 -5 -5 1.05 0.69
 9 -5 -4 11.06 2.04
 9 -5 -4 10.67 1.84
 9 -5 -3 10.82 2.1
 9 -5 -3 10.95 1.89
 9 -5 -2 20.84 2.5
 9 5 -2 23.63 3.14
 9 -5 -2 13.93 2.48
 9 5 -1 4.53 1.53
 9 -5 -1 5.17 1.57
 9 5 0 109.34 7.34
 9 -5 0 98.03 6.81
 9 5 1 2.74 1.23
 9 -5 1 3.12 1.29
 9 5 1 2.32 0.67
 9 5 2 79.32 4.32
 9 5 2 90.21 6.82
 9 -5 2 86.92 6.46
 9 5 3 0.05 0.47
 9 -5 3 -0.66 0.62
 9 -5 3 0.76 0.97
 9 5 3 0.33 0.29
 9 5 4 114.56 5.34
 9 5 4 112.63 7.14
 9 -5 5 5.41 1.29
 9 -5 6 5.56 1.28
 -9 6 8 2.35 0.68
 9 -6 -8 2.52 0.61
 9 -6 -7 52.67 3.42
 -9 6 7 45.96 3.46
 9 -6 -7 42.04 3.03
 9 -6 -6 3.62 1.03
 9 -6 -6 3.8 0.99
 9 -6 -5 17.77 2.37
 9 -6 -5 16.35 2.17
 9 -6 -4 29.09 3.19
 9 -6 -4 34.32 3.21
 9 -6 -3 0.75 0.64
 9 -6 -2 67.52 5.14
 9 6 -1 26.31 3.29
 9 -6 -1 19.87 2.89
 9 6 0 29.37 3.63
 9 -6 0 24.38 3.29
 9 6 1 115.45 7.39
 9 -6 1 102.93 6.8
 9 6 2 24.42 2.38
 9 6 2 30.04 3.79
 9 -6 2 27.29 3.46
 9 -6 3 64.68 5.21
 9 6 3 53.73 3.57
 9 6 3 57.45 5.15
 9 -6 3 47.36 4.21
 9 -6 4 12.08 2.03
 9 6 4 9.7 2.01
 9 6 4 9.96 1.54
 9 -6 5 19.61 2.39
 9 -6 6 84.13 4.27
 9 -7 -8 4.37 0.79
 9 -7 -7 1.7 0.59
 -9 7 7 2.23 0.75
 9 -7 -7 1.86 0.65
 9 -7 -6 1.64 0.67
 9 -7 -6 1.76 0.69
 9 -7 -5 37.65 3.31
 9 -7 -5 41.48 3.32
 9 -7 -4 2.58 0.98
 9 -7 -4 2.41 0.97
 9 -7 -3 132.07 6.72
 9 -7 -2 1.38 0.91
 9 -7 -1 157.56 7.82
 9 7 0 0.32 0.45
 9 -7 0 0.34 0.24
 9 7 1 0.48 0.62
 9 -7 1 0.98 0.72
 9 7 1 1.01 0.44
 9 7 2 3.41 1.2
 9 -7 2 2.98 0.95
 9 7 2 3.41 0.88
 9 7 3 60.59 3.7
 9 7 3 77.66 5.76
 9 -7 4 34.15 3.55
 9 7 4 5.71 1.1
 9 -7 5 148.8 6
 9 -8 -7 3.7 0.8
 9 -8 -7 3.07 0.72
 9 -8 -6 7.7 1.34
 9 -8 -6 8.83 1.38
 9 -8 -5 5.64 1.28
 9 -8 -5 7.46 1.38
 9 -8 -4 26.58 2.78
 9 -8 -4 33.5 3.03
 9 -8 -3 0.46 0.49
 9 -8 -2 97.93 5.7
 9 -8 -1 41.2 3.82
 9 8 0 50.66 3.03
 9 -8 0 54.17 4.44
 9 8 1 6.45 1.54
 9 -8 1 5.42 1.38
 9 8 1 5.75 1.04
 9 8 2 18.73 1.95
 9 8 2 23.98 3
 9 8 3 16.14 1.86
 9 8 4 95.82 4.43
 9 -9 -6 29.12 2.4
 -9 9 6 32.7 2.48
 9 -9 -6 31.47 2.38
 9 -9 -5 7.9 1.41
 9 -9 -5 11.34 1.56
 9 -9 -4 4.45 1.05
 9 -9 -4 6.9 1.31
 9 -9 -3 15.54 2.07
 9 -9 -2 0.86 0.54
 9 -9 -1 111.17 5.88
 9 9 0 55.87 3.08
 9 -9 0 64.56 4.51
 9 -9 1 2.71 1.05
 9 9 1 1.55 0.54
 9 9 2 117.63 4.71
 9 9 3 38.78 2.71
 9 9 4 49.86 3
 9 -10 -6 0.98 0.42
 9 -10 -6 0.5 0.28
 9 -10 -5 33.23 2.55
 9 -10 -5 37.03 2.56
 9 -10 -4 0.29 0.31
 9 -10 -4 1.29 0.61
 9 -10 -3 3.76 1.01
 9 -10 -2 0.4 0.32
 9 10 -1 77.83 3.3
 9 -10 -1 78.07 4.57
 9 -10 0 0.5 0.3
 9 10 0 1.14 0.45
 9 10 1 169.68 5.29
 9 10 2 4.33 0.89
 9 10 3 139.14 4.86
 9 10 4 0.72 0.26
 9 -11 -5 7.54 1.13
 9 -11 -5 8.93 1.14
 9 -11 -4 8.81 1.29
 9 -11 -4 12.27 1.44
 9 -11 -3 34.87 2.63
 9 -11 -2 7.6 1.26
 9 11 -1 17.27 1.47
 9 -11 -1 18.9 2
 9 11 0 22.56 1.76
 9 11 1 0.79 0.4
 9 11 2 91.1 3.64
 9 11 3 12.44 1.32
 -10 0 7 0.07 0.32
 -10 0 6 39.9 3.39
 -10 0 5 0.57 0.64
 -10 0 4 11.42 1.88
 10 0 -4 10.99 1.77
 10 0 -3 -0.29 0.39
 10 0 -2 0.67 0.48
 10 0 -1 0.44 0.49
 10 0 0 122.61 7.16
 10 0 1 -0.08 0.35
 10 0 2 134.45 7.15
 10 0 3 0.37 0.44
 10 0 4 57.82 4
 -10 -1 7 31.36 2.74
 -10 1 7 36.01 3.08
 -10 -1 6 3.64 1.01
 -10 1 6 3.89 1.1
 -10 -1 5 25.77 2.71
 -10 1 5 30.41 3.15
 10 -1 -5 24.99 2.51
 10 1 -4 7.69 1.44
 -10 -1 4 9.9 1.68
 10 -1 -4 9.55 1.73
 -10 -1 3 20.23 2.34
 10 1 -3 21.34 2.65
 10 -1 -3 18.49 2.47
 10 1 -2 25.96 3.12
 10 -1 -2 24.74 3.07
 10 1 -1 25.6 3.22
 10 -1 -1 25.04 3.19
 10 1 0 20.87 2.96
 10 -1 0 19.39 2.84
 10 1 1 138.43 7.45
 10 -1 1 128.16 7.27
 10 1 2 3.15 1.23
 10 -1 2 4.59 1.33
 10 1 3 107.07 6.05
 10 -1 3 102.49 5.8
 10 1 4 20.61 2.44
 10 -1 4 21.85 2.38
 -10 2 7 1.16 0.58
 -10 -2 6 11.54 1.67
 -10 2 6 14.55 2.13
 -10 -2 5 10.37 1.67
 -10 2 5 13.24 2.16
 10 -2 -5 10.8 1.66
 10 -2 -4 2.19 0.85
 -10 -2 4 1.96 0.7
 10 -2 -4 1.33 0.31
 10 2 -3 85.15 5.1
 10 -2 -3 82.95 5.26
 10 2 -2 0.11 0.22
 10 -2 -2 -0.15 0.45
 10 2 -1 87.51 5.76
 10 -2 -1 84.74 5.73
 10 2 0 10.39 2.05
 10 -2 0 10.66 2.09
 10 2 1 2.68 1.01
 10 -2 1 3.27 1.08
 10 2 2 22.4 2.88
 10 -2 2 20.89 2.73
 10 2 3 23.04 2.81
 10 -2 3 17.29 2.32
 10 2 4 16.76 2.19
 10 -2 4 15.61 1.97
 -10 3 7 3.67 1
 -10 -3 6 4.44 0.97
 -10 3 6 6.29 1.4
 10 -3 -5 -0.35 0.26
 10 -3 -5 -0.17 0.36
 10 -3 -4 40.91 2.91
 10 -3 -4 53.2 3.96
 10 -3 -3 0.11 0.2
 10 3 -2 60.49 4.37
 10 -3 -2 62.66 4.68
 10 3 -1 16.93 2.44
 10 -3 -1 16.48 2.48
 10 3 0 42.56 3.96
 10 -3 0 47.24 4.26
 10 3 1 3.71 1.18
 10 -3 1 3.58 1.2
 10 3 2 2.64 1.07
 10 -3 2 0.62 0.21
 10 3 3 0.76 0.51
 10 -3 3 1.24 0.66
 10 3 4 91.02 5.06
 -10 4 6 17.7 2.31
 10 -4 -6 12.82 1.57
 10 -4 -5 7.3 1.18
 10 -4 -5 10.36 1.59
 10 -4 -4 7.41 1.46
 10 -4 -4 5.23 1
 10 -4 -3 24.91 2.81
 10 4 -2 8.34 1.51
 10 -4 -2 6.42 1.48
 10 4 -1 6.83 1.49
 10 -4 -1 6.79 1.57
 10 4 0 63.65 4.62
 10 -4 0 57.01 4.54
 10 4 1 30.68 3.24
 10 -4 1 28.21 3.15
 10 4 2 178.67 7.76
 10 -4 2 167.28 7.27
 10 4 3 15.14 2.18
 10 -4 3 12.58 1.77
 -10 5 6 0.36 0.32
 10 -5 -6 0.03 0.3
 10 -5 -5 21.04 1.98
 10 -5 -5 25.48 2.44
 10 -5 -4 0.8 0.36
 10 -5 -4 -0.05 0.16
 10 -5 -3 0.8 0.53
 10 -5 -3 -0.02 0.39
 10 -5 -2 6.55 1.46
 10 5 -1 35.14 3.09
 10 -5 -1 31.63 3.23
 10 5 0 2.17 0.99
 10 -5 0 3.52 1.06
 10 5 1 63.69 4.49
 10 -5 1 59.3 4.37
 10 5 2 2.71 0.95
 10 -5 2 2.5 0.86
 10 5 3 121.06 5.9
 10 -6 -5 4.65 1
 10 -6 -5 3.75 0.82
 10 -6 -4 3.76 0.95
 10 -6 -4 3.77 0.82
 10 -6 -3 17.68 1.72
 10 -6 -3 18.76 2.24
 10 -6 -2 1.63 0.76
 10 -6 -1 38.94 3.4
 10 6 0 61.58 4.01
 10 -6 0 54.87 4.06
 10 6 1 1.11 0.64
 10 -6 1 1.94 0.64
 10 6 2 78.77 4.64
 10 -6 2 59.93 3.7
 10 -7 -5 4.1 0.91
 10 -7 -5 3.91 0.75
 10 -7 -4 45.04 2.65
 10 -7 -4 50.5 3.31
 10 -7 -3 -0.28 0.23
 10 -7 -3 0.08 0.17
 10 -7 -2 94.58 4.89
 10 -7 -1 0.76 0.5
 10 7 0 34.3 2.69
 10 -7 0 27.16 2.63
 10 -7 1 3.26 0.85
 10 -8 -4 0.95 0.36
 10 -8 -3 38.24 2.81
 10 -8 -2 11.67 1.61
 10 -8 -1 57.86 3.6
 10 -8 0 2.93 0.82
 10 -9 -3 2.66 0.67
 10 -9 -2 55.4 3.11
 11 0 -2 0.29 0.28
 11 0 -1 5.66 1.04
 11 0 0 -0.07 0.18
 11 0 1 73.78 3.68
 11 -1 -2 0.25 0.14
 11 1 -1 14.95 1.7
 11 -1 -1 13.67 1.67
 11 1 0 32.09 2.49
 11 -1 0 34.49 2.61
 11 1 1 1.47 0.56
 11 -1 1 0.86 0.38
 11 -2 -2 40.75 2.82
 11 -2 -1 0.8 0.31
 11 2 0 19.72 1.9
 11 -2 0 17.61 1.85
 11 -3 -2 2.28 0.66
 11 -3 -1 44.51 2.94
 11 -3 0 4.52 0.89

_iucr_refine_instructions_details
;

    ya327.res created by SHELXL-2014/7

TITL ya327_a.res in P2(1)/n
CELL 1.54184 9.0162 17.4431 11.6043 90 95.066 90
ZERR 4 0.0002 0.0004 0.0003 0 0.002 0
LATT 1
SYMM 0.5-X,0.5+Y,0.5-Z
SFAC C H N O Y
UNIT 56 60 4 28 4
DFIX 2.2 0.01 Y1 O7A Y1 O7
DFIX 1.3 0.01 O7A C11A O7 C11
DFIX 1.45 0.01 C12A C11A N1A C11A N1A C15A N1A C14A N1 C15 N1 C14 N1 C11
DFIX 1.45 0.01 C9 C10 C9 C10A
SIMU 0.01 0.02 2 O7 C11 C12 N1 C14 C15 O7A C11A C12A N1A C14A C15A
RIGU 0.01 0.01 C14 C11 C15 C12 N1
RIGU 0.01 0.01 O7 C11 C12 N1 C14 C15 O7A C11A C12A N1A C14A C15A
ISOR 0.01 0.02 C14 N1 C15 C12 C11
ISOR 0.01 0.02 O7 C11 C12 N1 C14 C15 O7A C11A C12A N1A C14A C15A
ISOR 0.01 0.02 C10 C10A
EADP C10 C10A
 
L.S. 20
PLAN  9
SIZE 0.22 0.2 0.18
BOND $H
HTAB
fmap 2
acta
ABIN
REM <olex2.extras>
REM <HklSrc "%.\\YA327.hkl">
REM </olex2.extras>
 
WGHT    0.112000    2.549300
FVAR       0.31602   0.40265   0.56163
Y1    5    0.989786    0.398600    0.557162    11.00000    0.03015    0.00859 =
         0.03049    0.00283   -0.01717   -0.00211
O1    4    0.839547    0.413053    0.388560    11.00000    0.06045    0.01682 =
         0.04236    0.00823   -0.03489   -0.00519
O2    4    0.836446    0.534138    0.323821    11.00000    0.05243    0.01308 =
         0.04396    0.00290   -0.03224   -0.00749
O3    4    0.594173    0.208207    0.162455    11.00000    0.06044    0.01094 =
         0.04280   -0.00011   -0.02942    0.00029
O4    4    0.444289    0.233998    0.008060    11.00000    0.07733    0.01347 =
         0.05497   -0.00076   -0.04528   -0.00098
O5    4    0.881868    0.516049    0.574714    11.00000    0.04026    0.02051 =
         0.04725    0.00438    0.00399    0.00941
O6    4    0.808518    0.633448    0.555338    11.00000    0.08037    0.03297 =
         0.07092    0.00104    0.01710    0.02742
PART 1
O7    4    0.788134    0.364499    0.643035    21.00000    0.05926    0.04112 =
         0.07756    0.02286    0.01567   -0.01851
PART 0
C1    1    0.797746    0.464926    0.318384    11.00000    0.03998    0.01494 =
         0.03456    0.00425   -0.02169   -0.00270
C2    1    0.692162    0.440597    0.216825    11.00000    0.03357    0.01320 =
         0.02942   -0.00125   -0.01548   -0.00329
C3    1    0.658200    0.363242    0.203472    11.00000    0.03291    0.01150 =
         0.02974    0.00084   -0.01523   -0.00054
AFIX  43
H3    2    0.699005    0.327642    0.256887    11.00000   -1.20000
AFIX   0
C4    1    0.562618    0.339429    0.109519    11.00000    0.03803    0.01302 =
         0.03267   -0.00030   -0.01731    0.00093
C5    1    0.501006    0.393629    0.031439    11.00000    0.04481    0.01302 =
         0.03435   -0.00228   -0.02610   -0.00167
AFIX  43
H5    2    0.436043    0.377363   -0.030440    11.00000   -1.20000
AFIX   0
C6    1    0.533164    0.470834    0.042806    11.00000    0.03441    0.01460 =
         0.02730    0.00148   -0.01771    0.00176
C7    1    0.630661    0.493633    0.137324    11.00000    0.03618    0.00921 =
         0.03565    0.00186   -0.02030   -0.00408
AFIX  43
H7    2    0.654559    0.545239    0.146922    11.00000   -1.20000
AFIX   0
C8    1    0.530607    0.255783    0.092117    11.00000    0.04653    0.01118 =
         0.03672   -0.00107   -0.02092    0.00329
C9    1    0.795109    0.569889    0.600114    11.00000    0.05863    0.04475 =
         0.06569   -0.00265    0.01238    0.02623
PART 1
C10   1    0.668915    0.548550    0.666818    31.00000    0.09010    0.08975 =
         0.08904   -0.00717    0.04165    0.02618
AFIX   3
H10A  2    0.580065    0.544960    0.615028    31.00000   -1.50000
H10B  2    0.656035    0.587190    0.723998    31.00000   -1.50000
H10C  2    0.688095    0.500050    0.704318    31.00000   -1.50000
AFIX   0
C11   1    0.711647    0.337455    0.723501    21.00000    0.06095    0.05319 =
         0.07883    0.01969    0.01315   -0.00413
C12   1    0.784204    0.285491    0.817570    21.00000    0.08191    0.06861 =
         0.08680    0.02758    0.01486    0.01095
AFIX   3
H12A  2    0.850754    0.248511    0.788960    21.00000   -1.50000
H12B  2    0.706644    0.259421    0.853540    21.00000   -1.50000
H12C  2    0.838364    0.317961    0.873270    21.00000   -1.50000
AFIX   0
N1    3    0.603128    0.294108    0.653675    21.00000    0.06392    0.07072 =
         0.09172    0.01097    0.00889   -0.00522
C14   1    0.573174    0.303930    0.529356    21.00000    0.06891    0.09944 =
         0.09351    0.01293   -0.00817   -0.01316
AFIX   3
H14A  2    0.612964    0.353150    0.511526    21.00000   -1.50000
H14B  2    0.467474    0.303800    0.509726    21.00000   -1.50000
H14C  2    0.618555    0.265030    0.485676    21.00000   -1.50000
AFIX   0
C15   1    0.510765    0.239093    0.708067    21.00000    0.07497    0.08422 =
         0.11012    0.00676    0.01698   -0.02066
AFIX   3
H15A  2    0.556634    0.189753    0.720577    21.00000   -1.50000
H15B  2    0.421275    0.233743    0.657397    21.00000   -1.50000
H15C  2    0.486915    0.259903    0.780737    21.00000   -1.50000
AFIX   0
PART 0
PART 2
O7A   4    0.803278    0.377788    0.670080   -21.00000    0.05687    0.04613 =
         0.06012    0.02106    0.00664   -0.01399
C11A  1    0.730054    0.324013    0.713280   -21.00000    0.06506    0.05156 =
         0.08098    0.01871    0.01435   -0.00814
C12A  1    0.750856    0.312386    0.837682   -21.00000    0.10216    0.08056 =
         0.08346    0.01828    0.02072   -0.00183
AFIX   3
H12D  2    0.853676    0.315206    0.867032   -21.00000   -1.50000
H12E  2    0.710876    0.263506    0.857012   -21.00000   -1.50000
H12F  2    0.696056    0.352456    0.871552   -21.00000   -1.50000
AFIX   0
N1A   3    0.578892    0.317537    0.675147   -21.00000    0.06638    0.06989 =
         0.09164    0.00254    0.01226   -0.00966
C14A  1    0.536471    0.352399    0.563315   -21.00000    0.08432    0.10513 =
         0.10249    0.01293   -0.00084   -0.01122
AFIX   3
H14D  2    0.590561    0.399439    0.557515   -21.00000   -1.50000
H14E  2    0.431641    0.363059    0.558095   -21.00000   -1.50000
H14F  2    0.557921    0.318729    0.501455   -21.00000   -1.50000
AFIX   0
C15A  1    0.471907    0.268178    0.723766   -21.00000    0.06670    0.08575 =
         0.11464    0.00110    0.02736   -0.02253
AFIX   3
H15D  2    0.430317    0.231448    0.668416   -21.00000   -1.50000
H15E  2    0.393907    0.300018    0.748576   -21.00000   -1.50000
H15F  2    0.520327    0.241828    0.789276   -21.00000   -1.50000
AFIX   0
C10A  1    0.717605    0.566102    0.705984   -31.00000    0.09010    0.08975 =
         0.08904   -0.00717    0.04165    0.02618
AFIX   3
H10D  2    0.757635    0.524442    0.753035   -31.00000   -1.50000
H10E  2    0.613095    0.557952    0.686565   -31.00000   -1.50000
H10F  2    0.732145    0.613332    0.747945   -31.00000   -1.50000
AFIX   0
HKLF 4
 
REM  ya327_a.res in P2(1)/n
REM R1 =  0.0587 for    3287 Fo > 4sig(Fo)  and  0.0606 for all    3516 data
REM    267 parameters refined using    319 restraints
 
END  
     
WGHT      0.1119      2.5690 

REM Instructions for potential hydrogen bonds
HTAB C10 O7
EQIV $1 -x+3/2, y-1/2, -z+3/2
HTAB C12 O6_$1
HTAB C12A O6_$1
EQIV $2 -x+1, -y+1, -z+1
HTAB C14A O6_$2

REM Highest difference peak  1.175,  deepest hole -1.383,  1-sigma level  0.147
Q1    1   0.9047  0.3998  0.6068  11.00000  0.05    1.17
Q2    1   0.9502  0.5392  0.4855  11.00000  0.05    1.06
Q3    1   1.0919  0.3989  0.5045  11.00000  0.05    0.95
Q4    1   1.0402  0.3343  0.5229  11.00000  0.05    0.90
Q5    1   0.9367  0.3327  0.5832  11.00000  0.05    0.82
Q6    1   0.9460  0.4160  0.7724  11.00000  0.05    0.79
Q7    1   0.7283  0.2094  0.4041  11.00000  0.05    0.75
Q8    1   0.9314  0.4597  0.5869  11.00000  0.05    0.73
Q9    1   0.6761  0.2188  0.4198  11.00000  0.05    0.70

  REM The information below was added by Olex2.
  REM
  REM R1 = 0.0587 for 3287 Fo > 4sig(Fo) and 0.0606 for all 7544 data
  REM n/a parameters refined using n/a restraints
  REM Highest difference peak 1.17, deepest hole -1.38
  REM Mean Shift 0, Max Shift 0.000.

  REM +++ Tabular Listing of Refinement Information +++
  REM R1_all = 0.0606
  REM R1_gt = 0.0587
  REM wR_ref = 0.1658
  REM GOOF = 1.083
  REM Shift_max = 0.000
  REM Shift_mean = 0
  REM Reflections_all = 7544
  REM Reflections_gt = 3287
  REM Parameters = n/a
  REM Hole = -1.38
  REM Peak = 1.17
  REM Flack = n/a

  
;
_olex2_submission_special_instructions 'No special instructions were received'
